# Supplementary material
Source: PubMed Central journal article supplement (PMC11620753)
Supplement: NIHMS2037076-supplement-Supporting_Information.pdf [file NIHMS2037076-supplement-Supporting_Information.pdf]

**Supporting information of**  
**Remote Hydroamination of Disubstituted Alkenes by a Combination of Isomerization and**  
**Regioselective N-H Addition**

Senjie Ma, Haoyu Fan, Craig S. Day, Yumeng Xi, and John F. Hartwig\*

Department of Chemistry, University of California, Berkeley, California 94720, United States.  
Department of Chemistry, University of California, Berkeley, and Division of Chemical Sciences,  
Lawrence Berkeley National Laboratory, CA 94720, United States

email: [jhartwig@berkeley.edu](mailto:hartwig@berkeley.edu)

Table of Contents

|                                                                                |            |
|--------------------------------------------------------------------------------|------------|
| <b>1. General Information</b> .....                                            | <b>3</b>   |
| 1.1 General Experimental Procedures.....                                       | 3          |
| 1.2 Reagents and Solvents .....                                                | 3          |
| 1.3 Chromatography and Data Analysis .....                                     | 3          |
| 1.4 Naming of Compounds .....                                                  | 4          |
| <b>2. General Procedures for the Remote Hydroamination of Alkenes</b> .....    | <b>5</b>   |
| <b>3. Reaction Development for the Remote Hydroamination of Alkenes</b> .....  | <b>6</b>   |
| <b>4. Investigation of Other N-H donors for Remote Hydroamination</b> .....    | <b>9</b>   |
| <b>5. Investigation for the Possibility of Reversible Hydroamination</b> ..... | <b>10</b>  |
| <b>6. Synthesis of Substrates and DIP-Ad-SEGPHOS</b> .....                     | <b>11</b>  |
| 6.1 Alkene Substrates.....                                                     | 11         |
| 6.2 Aminopyridine Substrates.....                                              | 19         |
| 6.3 DIP-Ad-SEGPHOS Synthesis .....                                             | 25         |
| <b>7. Scope of Hydroamination</b> .....                                        | <b>29</b>  |
| <b>8. Product Derivatization by S<sub>N</sub>Ar</b> .....                      | <b>58</b>  |
| <b>9. NMR Spectra</b> .....                                                    | <b>63</b>  |
| <b>10. References</b> .....                                                    | <b>251</b> |

## 1. General Information

### 1.1 General Experimental Procedures

All manipulations were performed in a nitrogen-filled glovebox or on a Schlenk manifold unless otherwise noted. Glassware was dried at 150 °C for at least 4 h before use. All liquid alkenes were stored over 4 Å molecular sieves in the glovebox for at least 12 h prior to use. All solid alkenes were used as received without further purification. All aminopyridines were purified by column chromatography to remove oxidized impurities prior to use. All catalytic reactions were assembled in a nitrogen-filled glovebox with oven-dried glassware and were stirred with Teflon-coated magnetic stirring bars.

### 1.2 Reagents and Solvents

DCM, Et<sub>2</sub>O, THF, and hexanes were collected from a solvent purification system containing a 0.33 m column of activated alumina under nitrogen and stored over 4 Å molecular sieves for at least 12 h prior to use. Anhydrous 1,4-dioxane was purchased from Acros, stored in a glovebox, and stored over 4 Å molecular sieves for at least 12 h prior to use. Phosphine ligands were used as received from Takasago or Strem. Aminopyridines was purchased from Aldrich, columned with ethyl acetate/hexanes, and stored in a glovebox. [Ir(coe)<sub>2</sub>Cl]<sub>2</sub> was used as received from Strem.

### 1.3 Chromatography and Data Analysis

**Flash column chromatography** was carried out with a Teledyne Isco CombiFlash Rf system using RediSep Rf Gold columns.

**<sup>1</sup>H, <sup>13</sup>C and <sup>19</sup>F NMR Spectra** were recorded on a Bruker 500 or 600 MHz spectrometer. <sup>1</sup>H chemical shifts are reported in parts per million, relative residual protiated solvent as a reference. <sup>13</sup>C chemical shifts are reported in parts per million, relative to the deuterated solvent as a reference. <sup>19</sup>F chemical shifts were reported in parts per million, relative to an external standard of CFCl<sub>3</sub>. <sup>31</sup>P chemical shifts were reported in parts per million, relative to an 85% H<sub>3</sub>PO<sub>4</sub> external standard.

**High-resolution mass spectral (HRMS)** data were obtained with PerkinElmer AxION 2 TOF (ESI and APCI), Thermo LTQ-FTICR (ESI) and Waters Autospec Premier (EI) mass spectrometers at the QB3/Chemistry Mass Spectrometry Facility at UC Berkeley at the LBNL Catalysis Facility.

**Gas Chromatography (GC)** was performed on an Agilent 7890 GC with an FID detector.

**Liquid Chromatography (LC)** was performed on a Waters ACQUITY UPLC System with a UV detector.

*[Return to table of contents]*

#### **1.4 Naming of Compounds**

Compound names are those generated by ChemDraw 16.0 software (PerkinElmer), following the IUPAC nomenclature.

## 2. General Procedures for the Remote Hydroamination of Alkenes

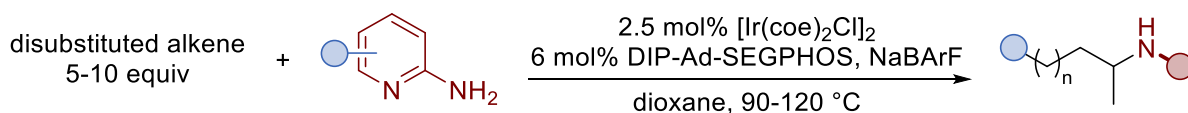

**Condition A:** In a nitrogen-filled glovebox, a 1-dram vial was charged sequentially with  $[\text{Ir}(\text{coe})_2\text{Cl}]_2$  (2.3 mg, 2.5  $\mu\text{mol}$ , 2.5 mol%), aminopyridine (0.10 mmol, 1.0 equiv), DIP-Ad-SEGPHOS (7.3 mg, 6.0  $\mu\text{mol}$ , 6.0 mol%), sodium tetrakis[3,5-bis(trifluoromethyl)phenyl]borate (5.4 mg, 6.0  $\mu\text{mol}$ , 6.0 mol%), alkene (0.50 to 1.0 mmol, 5.0 to 10 equiv) 1,4-dioxane (0.2 mL), and a magnetic stir bar. The vial was capped and removed from the glovebox. The reaction was heated at 90 to 120  $^\circ\text{C}$  in an aluminium heating block. The ratio between the product and aminopyridine was monitored by  $^1\text{H}$  NMR spectroscopy periodically, and the reaction was diluted with 1 mL of DCM after this ratio was great than 10:1 or this ratio remained unchanged for two consecutive aliquots. The last aliquot was analyzed by GC or LC to determine the regioselectivity of the reaction. The crude material was concentrated in vacuo and purified by flash column chromatography to afford the product.

### 3. Reaction Development for the Remote Hydroamination of Alkenes

In a nitrogen-filled glovebox, a 1-dram vial was charged sequentially with  $[\text{Ir}(\text{coe})_2\text{Cl}]_2$  (2.3 mg, 2.5  $\mu\text{mol}$ , 2.5 mol%), aminopyridine (0.10 mmol, 1.0 equiv), ligand (6.0  $\mu\text{mol}$ , 6.0 mol%), additive (6.0  $\mu\text{mol}$ , 6.0 mol%), 1,3,5-trimethoxybenzene (5.6 mg, 0.033 mmol), cis-4-octene (**1a**) (16 to 78  $\mu\text{L}$ , 0.10 to 0.50 mmol, 1.0 to 5.0 equiv) solvent (0.2 mL), and a magnetic stir bar. The vial was capped and removed from the glovebox. The reaction was heated at the designated temperature in an aluminium heating block. An aliquot (5  $\mu\text{L}$ ) was then taken from the reaction and analyzed by  $^1\text{H}$  NMR spectroscopy and GC.

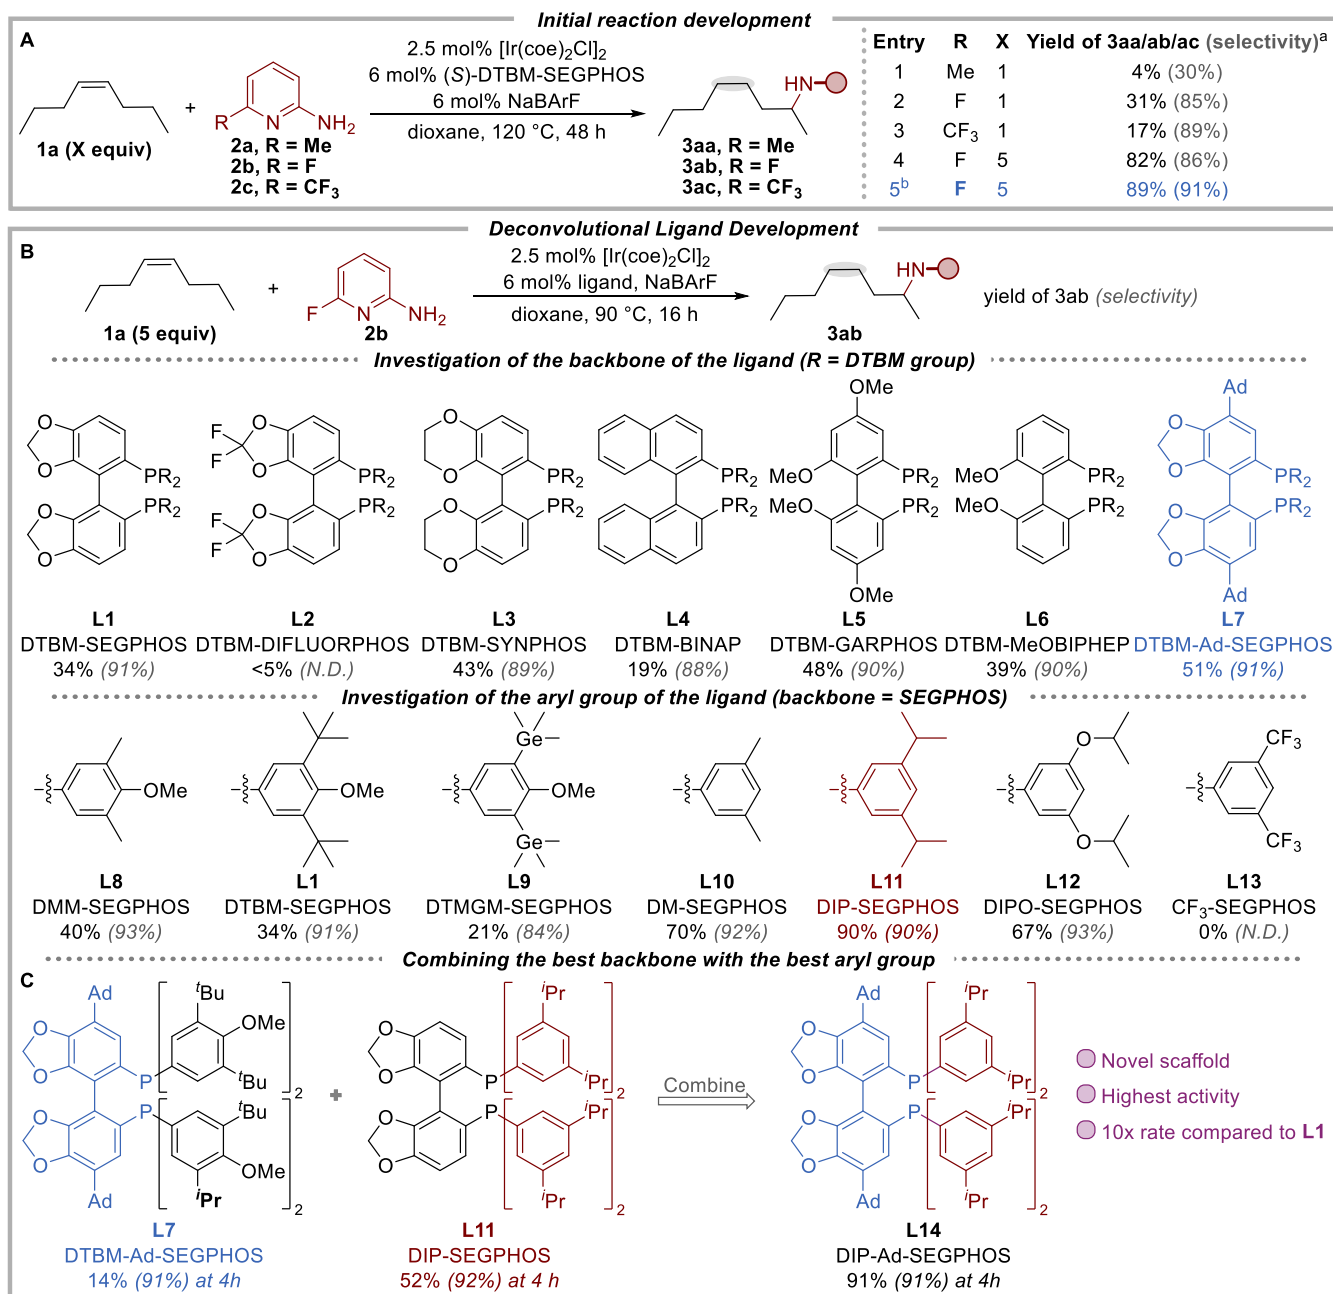

**Figure S1.** (A) Identification of suitable aminopyridine of the remote hydroamination of *cis*-4-octene. (B) Investigation effect of backbones and aryl fragments of the bisphosphine ligand on the remote hydroamination of *cis*-4-octene. (C) Identification of suitable ligand for the remote hydroamination of *cis*-4-octene. <sup>a</sup>Yield represents the yield of 2-amine with respect to 2-aminopyridine as the limiting reagent. selectivity = 2-amine/all amines. <sup>b</sup>The reaction was performed at 90 °C for 72 h.

[Return to table of contents]

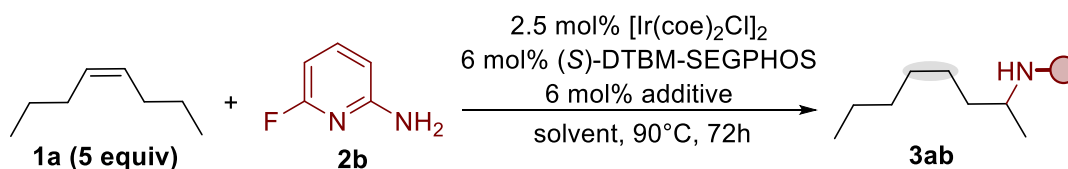

| Entry | solvent           | Additive            | Yield of <b>3ab</b> (selectivity) <sup>a</sup> |
|-------|-------------------|---------------------|------------------------------------------------|
| 1     | dioxane           | NaBARf              | 89% (91%)                                      |
| 2     | dioxane           | NaN Tf <sub>2</sub> | 7% (92%)                                       |
| 3     | dioxane           | NaOTf               | 0% (N.D.)                                      |
| 4     | PhF               | NaBARf              | 83% (88%)                                      |
| 5     | PhCl              | NaBARf              | 82% (88%)                                      |
| 6     | PhCF <sub>3</sub> | NaBARf              | 83% (85%)                                      |
| 7     | THF               | NaBARf              | 13% (89%)                                      |
| 8     | 2-Me-THF          | NaBARf              | 14% (89%)                                      |
| 9     | DME               | NaBARf              | 7% (85%)                                       |
| 10    | CPME              | NaBARf              | 23% (89%)                                      |

**Figure S2.** Investigation of the reaction conditions for the remote hydroamination of *cis*-4-octene.

<sup>a</sup>Yield represents the yield of 2-amine with respect to 2-aminopyridine as the limiting reagent.

selectivity = 2-amine/all amines.



## 4. Investigation of Other N-H donors for Remote Hydroamination

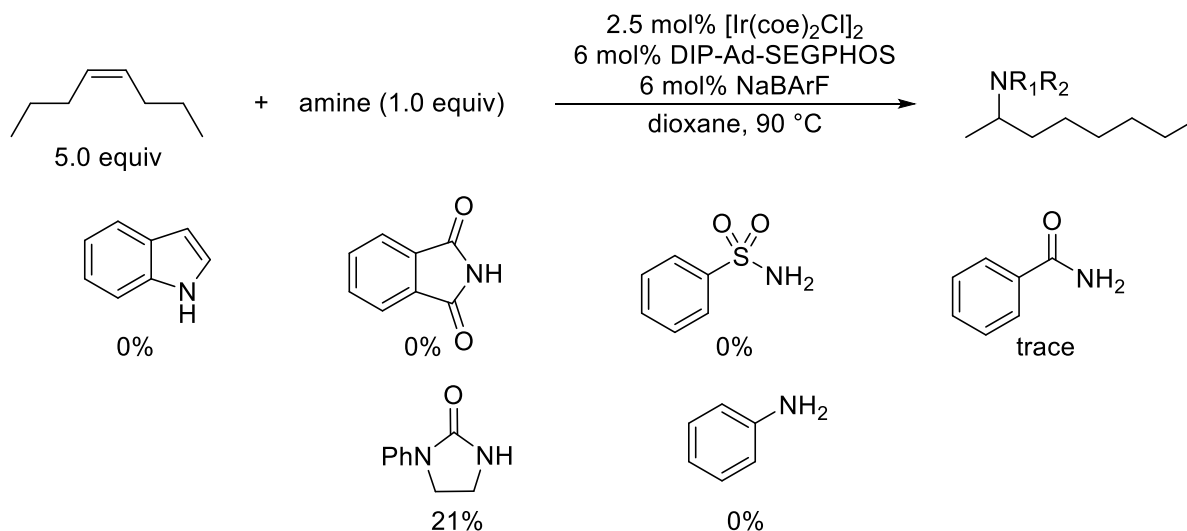

In a nitrogen-filled glovebox, a 1-dram vial was charged sequentially with  $[\text{Ir}(\text{coe})_2\text{Cl}]_2$  (2.3 mg, 2.5  $\mu\text{mol}$ , 2.5 mol%), aminopyridine (0.10 mmol, 1.0 equiv), DIP-Ad-SEGPHOS (7.3 mg, 6.0  $\mu\text{mol}$ , 6.0 mol%), sodium tetrakis[3,5-bis(trifluoromethyl)phenyl]borate (5.4 mg, 6.0  $\mu\text{mol}$ , 6.0 mol%), *cis*-4-octene (78  $\mu\text{L}$ , 0.50 mmol, 5.0 equiv) 1,4-dioxane (0.2 mL), and a magnetic stir bar. The vial was capped and removed from the glovebox. The reaction was heated at 90 °C in an aluminium heating block for 48 h. The crude material was analyzed by  $^1\text{H}$  NMR, concentrated in vacuo, and purified by flash column chromatography to afford the product.

## 5. Investigation for the Possibility of Reversible Hydroamination

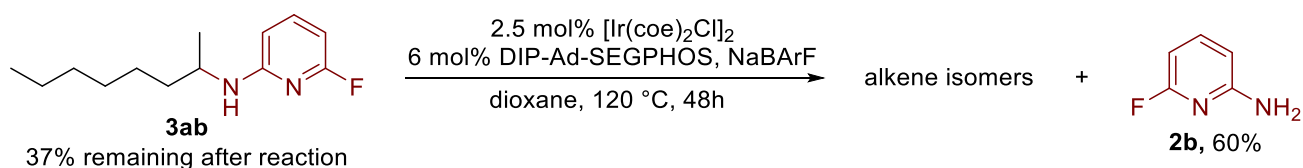

In a nitrogen-filled glovebox, a 1-dram vial was charged sequentially with  $[\text{Ir}(\text{coe})_2\text{Cl}]_2$  (2.3 mg, 2.5  $\mu\text{mol}$ , 2.5 mol%), aminopyridine 6-fluoro-N-(octan-2-yl)pyridin-2-amine (**3ab**) (22 mg, 0.10 mmol, 1.0 equiv), DIP-Ad-SEGPHOS (7.3 mg, 6.0  $\mu\text{mol}$ , 6.0 mol%), sodium tetrakis[3,5-bis(trifluoromethyl)phenyl]borate (5.4 mg, 6.0  $\mu\text{mol}$ , 6.0 mol%), 1,3,5-trimethoxybenzene (5.6 mg, 0.033 mmol), dioxane (0.2 mL), and a magnetic stir bar. The vial was capped and removed from the glovebox. The reaction was heated at 120 °C in an aluminium heating block for 72 h. The reaction was cooled to room temperature, and a 5  $\mu\text{L}$  aliquot was taken. The aliquot was analyzed by  $^1\text{H}$  NMR spectroscopy. Analysis by what type  $^1\text{H}$  NMR spectroscopy showed that **2b** was formed in 60% yield along with the formation of octene isomers. 37% of **3ab** was detected after the reaction.

## 6. Synthesis of Substrates and DIP-Ad-SEGPPOS

### 6.1 Alkene Substrates

**Condition B:** An oven-dried flask was charged with dry DCM (15 mL), carboxylic acid (1.0 to 1.1 equiv), 4-dimethylamino pyridine (DMAP) (0.10 equiv), alcohol (1.0 to 1.1 equiv), *N,N'*-diisopropylcarbodiimide (DIC) (1.0 equiv), and a magnetic stir bar. The reaction mixture was allowed to stir at room temperature for 24 h, before filtering and concentrating under reduced pressure. The crude residue was directly purified by flash column chromatography to yield pure ester. **Notes:** No attempts were made to optimize for yield.

#### Compound 1f

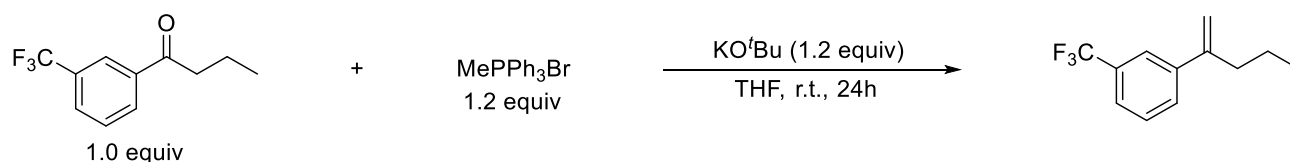

An oven-dried flask was charged with dry THF (15 mL), MePPh<sub>3</sub>Br (2.6 g, 7.4 mmol), and a magnetic stir bar. At 0 °C, a dry THF solution (20 ml) of potassium *tert*-butoxide (830 mg, 7.4 mmol) was added dropwise. The mixture was warmed to room temperature and stirred for 1 h. At room temperature, A THF solution (20 ml) of 1-(3-(trifluoromethyl)phenyl)butan-1-one (1.3 g, 6.2 mmol) was added dropwise. The reaction mixture was allowed to stir at room temperature for 24 h, before concentrating under reduced pressure. The product was purified by flash column chromatography (SiO<sub>2</sub>; Hexanes) to afford the corresponding alkene **1f** (944 mg, 72%) as a colorless oil. Note: Contains 15% of an inseparable trisubstituted isomer.

**<sup>1</sup>H NMR** (600 MHz, CDCl<sub>3</sub>) δ 7.65 (app-s, 1H), 7.58 (d, J = 7.9 Hz, 1H), 7.53 (d, J = 7.7 Hz, 1H), 7.42 (t, J = 7.7 Hz, 1H), 5.33 (d, J = 1.3 Hz, 1H), 5.15 (q, J = 1.3 Hz, 1H), 2.51 (td, J = 7.8, 1.2 Hz, 2H), 1.49 (h, J = 7.4 Hz, 2H), 0.94 (t, J = 7.4 Hz, 3H).

**<sup>13</sup>C NMR** (151 MHz, CDCl<sub>3</sub>) δ 147.51, 142.49, 132.07, 130.82 (q, J = 32.0 Hz) 128.83, 124.40 (q, J = 272.0 Hz), 124.07 (q, J = 3.7 Hz), 123.05 (q, J = 3.9 Hz), 113.88, 37.40, 21.34, 13.81.

**HRMS** (*m/z*): (EI) calc'd [M]<sup>+</sup>: 214.0969, found: 214.0972.

### Compound 1k

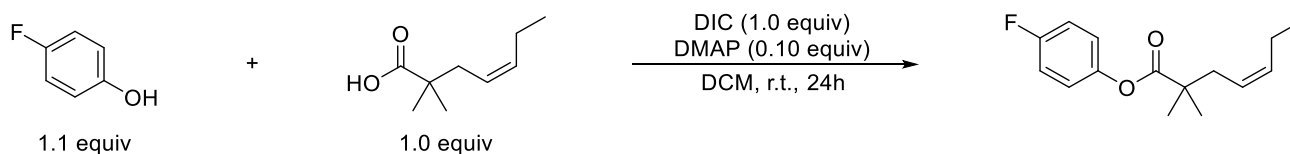

According to **Condition B**, (Z)-2,2-dimethylhept-4-enoic acid<sup>1</sup> (313 mg, 2.00 mmol) and 4-fluorophenol (247 mg, 2.20 mmol) were coupled, and the product was purified by flash column chromatography (SiO<sub>2</sub>; 95:5 Hexanes:EA) to afford the corresponding ester **1k** (413 mg, 66%) as a colorless oil.

<sup>1</sup>H NMR (500 MHz, CDCl<sub>3</sub>) δ 7.09 – 6.95 (m, 4H), 5.59 – 5.50 (m, 1H), 5.42 – 5.35 (m, 1H), 2.43 (d, J = 7.5 Hz, 2H), 2.08 (p, J = 7.5 Hz, 2H), 1.33 (s, 6H), 0.97 (t, J = 7.5 Hz, 3H).

<sup>13</sup>C NMR (126 MHz, CDCl<sub>3</sub>) δ 176.32, 160.14 (d, J = 243.95 Hz) 146.89 (d, J = 3.0 Hz), 134.87, 123.64, 122.91 (d, J = 8.4 Hz), 115.97 (d, J = 23.4 Hz), 42.77, 37.69, 24.82, 20.68, 14.14.

HRMS (*m/z*): (EI) calc'd for [M]<sup>+</sup>: 250.1369, found: 250.1371.

### Compound 1l

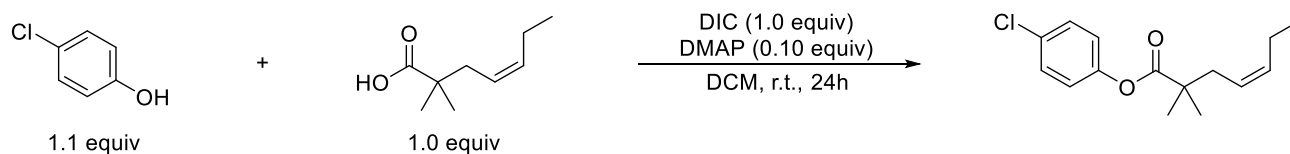

According to **Condition B**, (Z)-2,2-dimethylhept-4-enoic acid (391 mg, 2.50 mmol) and 4-chlorophenol (354 mg, 2.75 mmol) were coupled, and the product was purified by flash column chromatography (SiO<sub>2</sub>; 95:5 Hexanes:EA) to afford the corresponding ester **1l** (320 mg, 48%) as a colorless oil.

<sup>1</sup>H NMR (500 MHz, CDCl<sub>3</sub>) δ 7.36 – 7.31 (m, 2H), 7.04 – 6.86 (m, 2H), 5.67 – 5.49 (m, 1H), 5.43 – 5.33 (m, 1H), 2.53 – 2.30 (d, J = 7.6 Hz, 2H), 2.08 (p, J = 7.5 Hz, 2H), 1.32 (s, 6H), 0.96 (t, J = 7.5 Hz, 3H).

<sup>13</sup>C NMR (126 MHz, CDCl<sub>3</sub>) δ 176.06, 149.56, 134.92, 130.96, 129.39, 123.58, 122.94, 42.83, 37.68, 24.80, 20.68, 14.14.

HRMS (*m/z*): (EI) calc'd for [M]<sup>+</sup>: 266.1074, found: 266.1077.

### Compound 1m

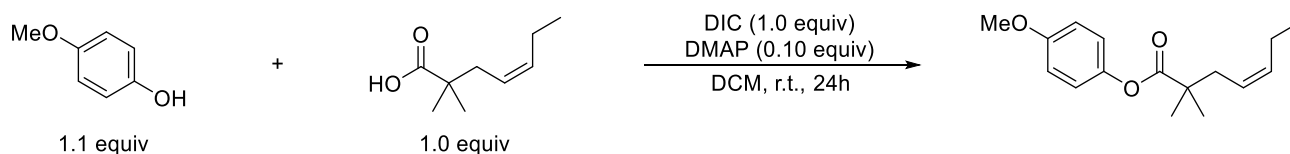

According to **Condition B**, (Z)-2,2-dimethylhept-4-enoic acid (391 mg, 2.50 mmol) and 4-methoxyphenol (341 mg, 2.75 mmol) were coupled, and the product was purified by flash column chromatography (SiO<sub>2</sub>; 95:5 Hexanes:EA) to afford the corresponding ester **1m** (395 mg, 56%) as a colorless oil.

<sup>1</sup>H NMR (500 MHz, CDCl<sub>3</sub>) δ 7.01 – 6.91 (m, 2H), 6.91 – 6.76 (m, 2H), 5.61 – 5.47 (m, 1H), 5.45 – 5.34 (m, 1H), 3.79 (s, 3H), 2.43 (d, J = 7.6 Hz, 2H), 2.09 (p, J = 7.5 Hz, 2H), 1.32 (s, 6H), 0.97 (t, J = 7.5 Hz, 3H).

<sup>13</sup>C NMR (126 MHz, CDCl<sub>3</sub>) δ 176.63, 157.10, 144.58, 134.73, 123.83, 122.26, 114.39, 55.60, 42.71, 37.72, 24.86, 20.68, 14.16.

HRMS (*m/z*): (EI) calc'd [M]<sup>+</sup>: 262.1569, found: 262.1572.

### Compound 1n

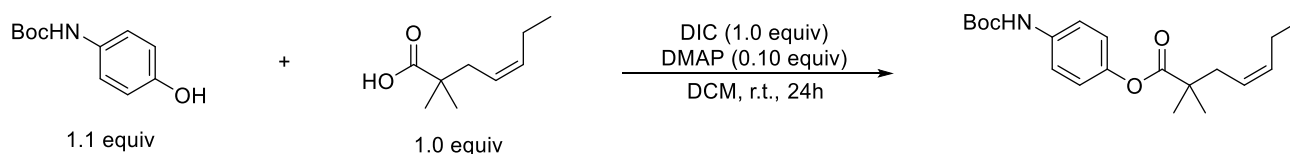

According to **Condition B**, (Z)-2,2-dimethylhept-4-enoic acid (391 mg, 2.50 mmol) and tert-butyl (4-hydroxyphenyl)carbamate (575 mg, 2.75 mmol) were coupled, and the product was purified by flash column chromatography (SiO<sub>2</sub>; 90:10 Hexanes:EA) to afford the corresponding ester **1n** (576 mg, 66%) as a colorless oil.

<sup>1</sup>H NMR (500 MHz, CDCl<sub>3</sub>) δ 7.34 (d, J = 8.4 Hz, 2H), 7.00 – 6.90 (m, 2H), 6.47 (s, 1H), 5.57 – 5.50 (m, 1H), 5.44 – 5.35 (m, 1H), 2.42 (d, J = 7.6 Hz, 2H), 2.08 (p, J = 7.5 Hz, 2H), 1.51 (s, 9H), 1.31 (s, 6H), 0.96 (t, J = 7.5 Hz, 3H).

$^{13}\text{C}$  NMR (126 MHz,  $\text{CDCl}_3$ )  $\delta$  176.42, 152.72, 146.41, 135.82, 134.78, 123.76, 121.92, 119.31, 42.74, 37.70, 28.34, 24.83, 20.68, 14.15.

HRMS ( $m/z$ ): (ESI) calc'd for  $[2\text{M}+\text{Na}]^+$ : 717.4086, found: 717.4088.

### Compound 1o

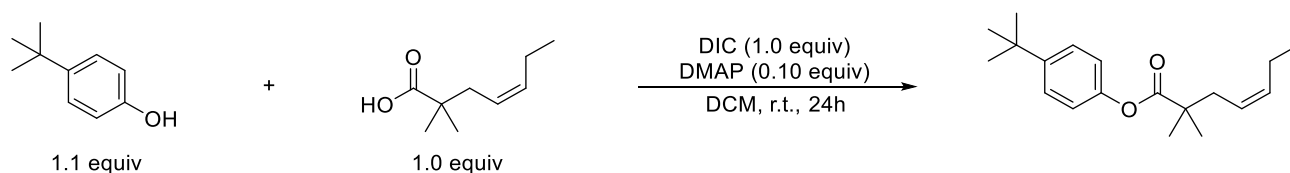

According to **Condition B**, (Z)-2,2-dimethylhept-4-enoic acid (391 mg, 2.50 mmol) and 4-(tert-butyl)phenol (413 mg, 2.75 mmol) were coupled, and the product was purified by flash column chromatography ( $\text{SiO}_2$ ; 95:5 Hexanes:EA) to afford the corresponding ester **1o** (296 mg, 41%) as a colorless oil.

$^1\text{H}$  NMR (500 MHz,  $\text{CDCl}_3$ )  $\delta$  7.39 – 7.35 (m, 2H), 7.01 – 6.94 (m, 2H), 5.64 – 5.48 (m, 1H), 5.44 – 5.37 (m, 1H), 2.43 (d,  $J = 7.6$  Hz, 2H), 2.09 (p,  $J = 7.4$  Hz, 2H), 1.33 (s, 6H), 1.31 (s, 9H), 0.97 (t,  $J = 7.5$  Hz, 3H).

$^{13}\text{C}$  NMR (126 MHz,  $\text{CDCl}_3$ )  $\delta$  176.42, 148.72, 148.38, 134.71, 126.22, 123.86, 120.81, 42.75, 37.71, 34.46, 31.43, 24.86, 20.69, 14.17.

HRMS ( $m/z$ ): (EI) calc'd  $[M]^+$ : 288.2089, found: 288.2089.

### Compound 1p

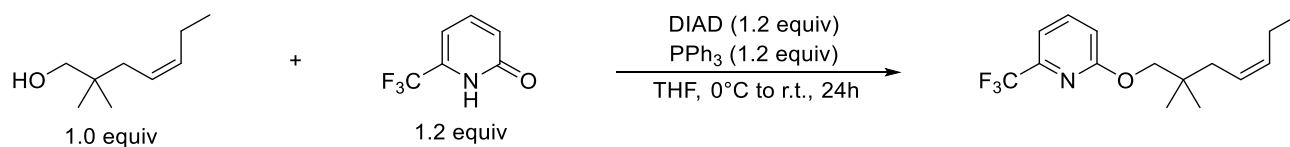

An oven-dried flask was charged with (Z)-2,2-dimethylhept-4-en-1-ol (370 mg, 2.62 mmol), triphenylphosphine (824 mg 3.16 mmol), 6-(trifluoromethyl)pyridin-2(1H)-one (512 mg, 3.16 mmol), 15 mL of dry THF, and a magnetic stir bar. The solution was cooled to 0 °C, and diisopropyl azodicarboxylate (DIAD) (617  $\mu\text{L}$ , 3.14 mmol) was added dropwise. The resulting mixture was slowly

[Return to table of contents]

warmed to room temperature. After stirring for 24 h, the reaction was concentrated under reduced pressure. The crude material was purified by flash column chromatography (SiO<sub>2</sub>; 97:3 Hexanes:EA) to afford the corresponding ether **1p** (540 mg, 72%) as a colorless oil.

<sup>1</sup>H NMR (500 MHz, CDCl<sub>3</sub>) δ 7.67 (t, J = 7.8 Hz, 1H), 7.22 (d, J = 7.2 Hz, 1H), 6.91 (d, J = 8.4 Hz, 1H), 5.51 – 5.44 (m, 1H), 5.43 – 5.36 (m, 1H), 4.04 (s, 2H), 2.13 (d, J = 7.7 Hz, 2H), 2.03 (p, J = 7.4, 2H), 1.01 (s, 6H), 0.91 (t, J = 7.5 Hz, 3H).

<sup>13</sup>C NMR (151 MHz, CDCl<sub>3</sub>) δ 164.32, 145.49 (q, J = 34.5 Hz), 139.08, 133.99, 124.53, 121.42 (q, J = 273.6 Hz), 114.58, 112.89 (q, J = 3.2 Hz), 74.14, 36.19, 34.78, 24.37, 20.51, 14.13.

HRMS (*m/z*): (ESI) calc'd for [M+Na]<sup>+</sup>: 300.1389, found: 300.1399.

### Compound 1q

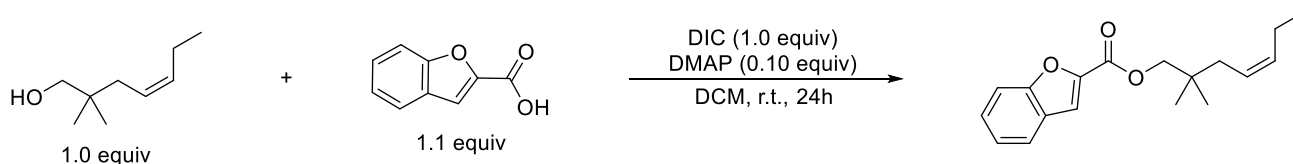

According to **Condition B**, benzofuran-2-carboxylic acid (446 mg, 2.75 mmol) and (Z)-2,2-dimethylhept-4-en-1-ol (356 mg, 2.50 mmol) were coupled, and the product was purified by flash column chromatography (SiO<sub>2</sub>; 90:10 Hexanes:EA) to afford the corresponding ester **1q** (626 mg, 87%) as a colorless oil.

<sup>1</sup>H NMR (500 MHz, CDCl<sub>3</sub>) δ 7.69 (dt, J = 8.0, 1.0 Hz, 1H), 7.60 (dq, J = 8.4, 0.9 Hz, 1H), 7.51 (d, J = 1.0 Hz, 1H), 7.45 (ddd, J = 8.5, 7.2, 1.3 Hz, 1H), 7.31 (ddd, J = 8.0, 7.2, 0.9 Hz, 1H), 5.59 – 5.47 (m, 1H), 5.44 – 5.37 (m, 1H), 4.11 (s, 2H), 2.14 (d, J = 7.6 Hz, 2H), 2.07 (pd, J = 7.5, 1.6 Hz, 2H), 1.03 (s, 6H), 0.94 (t, J = 7.5 Hz, 3H).

<sup>13</sup>C NMR (126 MHz, CDCl<sub>3</sub>) δ 159.85, 155.94, 145.82, 134.57, 127.68, 127.13, 124.13, 123.91, 122.92, 113.65, 112.56, 72.96, 36.34, 34.99, 24.38, 20.70, 14.32.

HRMS (*m/z*): (EI) calc'd for [M]<sup>+</sup>: 286.1569, found: 286.1566.

### Compound 1s

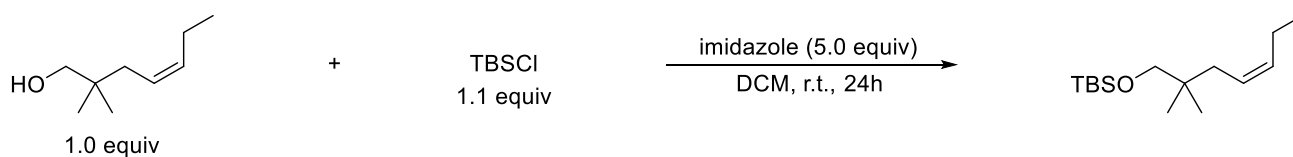

An oven-dried flask was charged with dry DCM (15 mL), TBSCl (332mg, 2.20 mmol), (Z)-2,2-dimethylhept-4-en-1-ol (284 mg, 2.00 mmol), imidazole (681 mg, 10.0 mmol) and a magnetic stir bar. The reaction mixture was allowed to stir at room temperature for 24 h, before concentrating under reduced pressure. The crude residue was directly purified by flash column chromatography (SiO<sub>2</sub>; Hexanes) to afford the corresponding ether **1s** (415 mg, 81%) as a colorless oil. Note: Contains 7% of inseparable TBS siloxane.

<sup>1</sup>H NMR (500 MHz, CDCl<sub>3</sub>) δ 5.47 – 5.38 (m, 1H), 5.37 – 5.30 (m, 1H), 3.21 (s, 2H), 2.02 (p, J = 7.5 Hz, 2H), 1.95 (d, J = 7.8 Hz, 2H), 0.92 (t, J = 7.5 Hz, 3H), 0.87 (s, 9H), 0.80 (s, 6H), 0.00 (s, 6H).

<sup>13</sup>C NMR (126 MHz, CDCl<sub>3</sub>) δ 133.44, 125.61, 71.49, 36.19, 35.87, 26.07, 24.06 (two carbons), 20.67, 14.43, -5.34.

HRMS (*m/z*): (EI) calc'd [M-CH<sub>3</sub>]<sup>+</sup>: 241.1988, found: 241.1988.

### Compound 1u

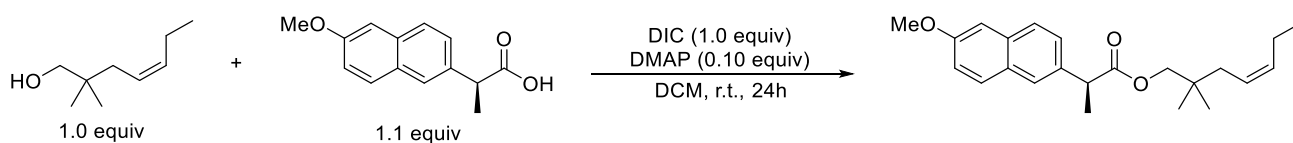

According to **Condition B**, naproxen (507 mg, 2.20 mmol) and (Z)-2,2-dimethylhept-4-en-1-ol (284 mg, 2.00 mmol) were coupled, and the product was purified by flash column chromatography (SiO<sub>2</sub>; 85:15 Hexanes:EA) to afford the corresponding ester **1u** (547 mg, 77%) as a colorless oil.

<sup>1</sup>H NMR (500 MHz, CDCl<sub>3</sub>) δ 7.69 (d, J = 8.6 Hz, 2H), 7.68 – 7.66 (m, 1H), 7.42 (dd, J = 8.4, 1.9 Hz, 1H), 7.17 – 7.08 (m, 2H), 5.44 – 5.36 (m, 1H), 5.29 – 5.20 (m, 1H), 3.91 (s, 3H), 3.88 (q, J = 7.2 Hz, 1H), 3.84 – 3.73 (m, 2H), 1.94 – 1.80 (m, 4H), 1.60 (d, J = 7.1 Hz, 3H), 0.85 (t, J = 7.5 Hz, 3H), 0.81 (d, J = 6.2 Hz, 6H).



[Return to table of contents]

$^{13}\text{C}$  NMR (126 MHz,  $\text{CDCl}_3$ )  $\delta$  174.61, 157.60, 135.75, 134.12, 133.68, 129.27, 128.94, 127.03, 126.41, 126.00, 124.13, 118.92, 105.59, 72.28, 55.30, 45.68, 36.02, 34.65, 24.07, 24.02, 20.41, 18.29, 14.13.

HRMS ( $m/z$ ): (EI) calc'd for  $[\text{M}]^+$ : 354.2195, found: 354.2189.

### Compound 1v

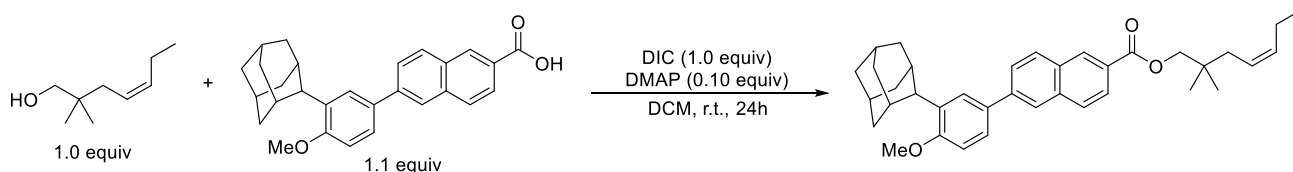

According to **Condition B**, adapalene (991 mg, 2.40 mmol) and (Z)-2,2-dimethylhept-4-en-1-ol (311 mg, 2.18 mmol) were coupled, and the product was purified by flash column chromatography ( $\text{SiO}_2$ ; 90:10 Hexanes:EA) to afford the corresponding ester **1v** (871 mg, 74%) as a white solid.

$^1\text{H}$  NMR (500 MHz,  $\text{CDCl}_3$ )  $\delta$  8.62 (s, 1H), 8.09 (dd,  $J = 8.5, 1.7$  Hz, 1H), 8.03 – 8.01 (m, 1H), 8.00 (d,  $J = 8.6$  Hz, 1H), 7.93 (d,  $J = 8.6$  Hz, 1H), 7.81 (dd,  $J = 8.5, 1.8$  Hz, 1H), 7.62 (d,  $J = 2.4$  Hz, 1H), 7.55 (dd,  $J = 8.4, 2.4$  Hz, 1H), 7.00 (d,  $J = 8.4$  Hz, 1H), 5.57 – 5.50 (m, 1H), 5.49 – 5.41 (m, 1H), 4.13 (s, 2H), 3.91 (s, 3H), 2.22 – 2.18 (m, 8H), 2.14 – 2.05 (m, 5H), 1.81 (app-s, 6H), 1.08 (s, 6H), 0.95 (t,  $J = 7.5$  Hz, 3H).

$^{13}\text{C}$  NMR (126 MHz,  $\text{CDCl}_3$ )  $\delta$  166.83, 158.94, 141.37, 139.03, 135.96, 134.31, 132.59, 131.29, 130.72, 129.72, 128.24, 127.31, 126.48, 126.00, 125.75, 125.57, 124.76, 124.24, 112.13, 72.64, 55.18, 40.63 (two carbons), 37.24, 37.15 (two carbons), 36.40, 34.91, 29.14 (two carbons), 24.45, 20.61, 14.21.

HRMS ( $m/z$ ): (EI) calc'd for  $[\text{M}]^+$ : 536.3290, found: 536.3290.

### Compound 1w

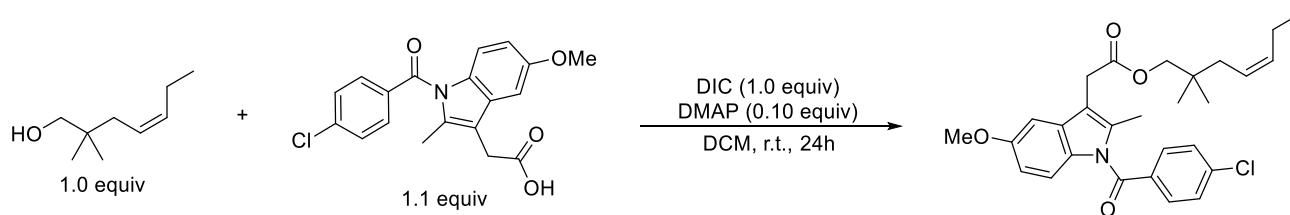

According to **Condition B**, indomethacin (787 mg, 2.20 mmol) and (Z)-2,2-dimethylhept-4-en-1-ol (284 mg, 2.00 mmol) were coupled, and the product was purified by flash column chromatography (SiO<sub>2</sub>; 85:15 Hexanes:EA) to afford the corresponding ester **1w** (317 mg, 33%) as a yellow oil.

<sup>1</sup>H NMR (500 MHz, CDCl<sub>3</sub>) δ 7.67 – 7.59 (m, 2H), 7.49 – 7.43 (m, 2H), 6.97 (d, J = 2.6 Hz, 1H), 6.87 (d, J = 9.0 Hz, 1H), 6.67 (dd, J = 9.0, 2.6 Hz, 1H), 5.48 – 5.39 (m, 1H), 5.32 – 5.23 (m, 1H), 3.83 (s, 3H), 3.82 (s, 2H), 3.68 (s, 2H), 2.40 (s, 3H), 1.97 – 1.88 (m, 4H), 0.89 (t, J = 7.6 Hz, 3H), 0.85 (s, 6H).

<sup>13</sup>C NMR (126 MHz, CDCl<sub>3</sub>) δ 170.87, 168.28, 156.09, 139.26, 135.74, 134.26, 133.95, 131.17, 130.80, 130.64, 129.12, 123.98, 114.97, 112.78, 111.85, 101.19, 72.63, 55.69, 36.06, 34.52, 30.47, 24.09, 20.45, 14.17, 13.34.

HRMS (*m/z*): (EI) calc'd for [2M+Na]<sup>+</sup>: 985.3932, found: 985.3941.

### Compound 1x

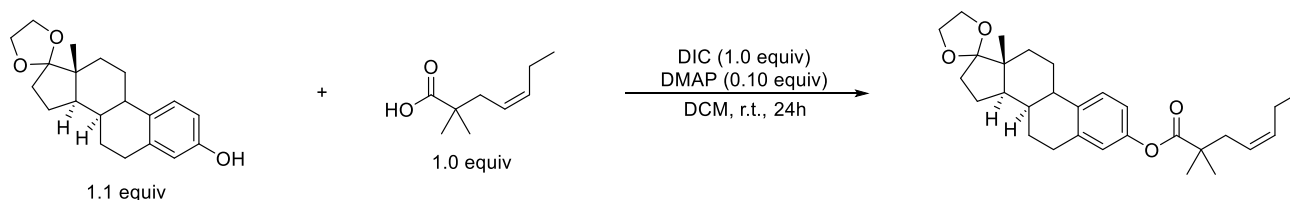

According to **Condition B**, (Z)-2,2-dimethylhept-4-enoic acid (391 mg, 2.50 mmol) and (8R,13R,14R)-13-methyl-6,7,8,9,11,12,13,14,15,16-decahydrospiro[cyclopenta[a]phenanthrene-17, 2' [1,3]dioxolan]-3-ol (847 mg, 2.75 mmol) were coupled, and the product was purified by flash column chromatography (SiO<sub>2</sub>; 95:5 Hexanes:EA) to afford the corresponding ester **1x** (552 mg, 49%) as a colorless oil.

<sup>1</sup>H NMR (500 MHz, CDCl<sub>3</sub>) δ 7.27 (d, J = 8.4 Hz, 1H), 6.80 (d, J = 8.5 Hz, 1H), 6.75 (s, 1H), 5.61 – 5.51 (m, 1H), 5.45 – 5.36 (m, 1H), 4.01 – 3.85 (m, 4H), 2.91 – 2.79 (m, 2H), 2.42 (d, J = 7.6 Hz, 2H), 2.37 – 2.22 (m, 2H), 2.14 – 2.07 (m, 2H), 2.07 – 1.99 (m, 1H), 1.86 – 1.80 (m, 4H), 1.70 – 1.33 (m, 6H), 1.32 (s, 6H), 0.97 (t, J = 7.5 Hz, 3H), 0.88 (s, 3H).

<sup>13</sup>C NMR (126 MHz, CDCl<sub>3</sub>) δ 176.50, 148.77, 138.18, 137.79, 134.69, 126.29, 123.89, 121.41, 119.41, 118.49, 65.28, 64.60, 49.41, 46.12, 43.83, 42.72, 38.73, 37.70, 34.24, 30.70, 29.54, 26.82, 26.01, 24.86 (two carbons), 22.38, 20.68, 14.33, 14.17.

HRMS (*m/z*): (ESI) calc'd for [2M+Na]<sup>+</sup>: 927.5746, found: 927.5724.

## 6.2 Aminopyridine Substrates

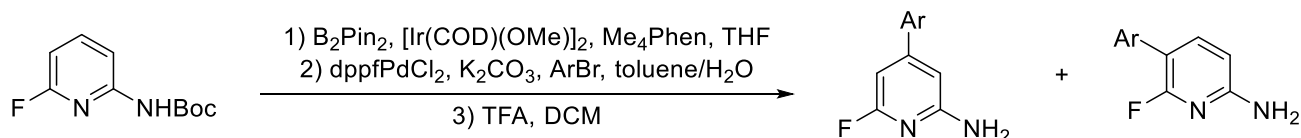

**Condition C<sup>2</sup>:** In a nitrogen-filled glovebox, a 20mL vial was charged sequentially with [Ir(COD)(OMe)<sub>2</sub>] (6.6 mg, 0.010 mmol, 1.0 mol%), tetramethylphenanthroline (5.2 mg, 0.022 mmol, 2.2 mol%), B<sub>2</sub>pin<sub>2</sub> (380 mg, 1.5 mmol, 1.5 equiv), HBpin (20 μL), dried THF (2.0 mL), and a magnetic stir bar. The vial was capped and removed from the glovebox. The reaction was heated at 80 °C for 0.5 h and brought back into the glovebox. Tert-butyl (6-fluoropyridin-2-yl)carbamate (210 mg, 1.0 mmol, 1.0 equiv) was added and the vial was capped and removed from the glovebox. The reaction was heated at 50 °C for 0.75 h, brought back into the glovebox, filtered, and concentrated in vacuo. Aryl bromide (1.2 mmol, 1.2 equiv), dppfPdCl<sub>2</sub> (37 mg, 0.050 mmol, 5 mol%), K<sub>2</sub>CO<sub>3</sub> (350 mg, 2.5 mmol, 2.5 equiv), toluene (2.0 mL), and water (0.2 mL) were then added. The vial was capped and removed from the glovebox. The reaction was heated at 100 °C for 24 h, filtered, concentrated under reduced pressure, and redissolved in DCM (2.0 mL). At room temperature, TFA (766 μL, 10.0 mmol, 10.0 equiv) was added dropwise. The reaction mixture was allowed to stir overnight before quenched with NaHCO<sub>3</sub> and extracted with DCM. The reaction mixture was concentrated under reduced pressure and purified by flash column chromatography (SiO<sub>2</sub>) to afford correspond arylated aminopyridines as yellow solids.

## Compound 2g-NHBoc

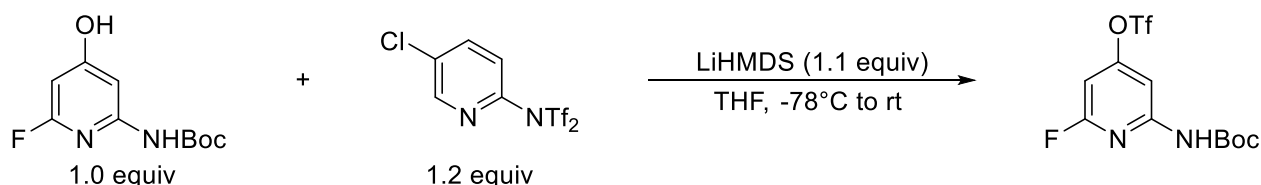

An oven-dried flask was charged with dry THF (15 mL), tert-butyl (6-fluoro-4-hydroxypyridin-2-yl)carbamate (84 mg, 0.37 mmol) and a magnetic stir bar. At -78 °C, LiHMDS (1M solution, 410  $\mu$ L, 0.41 mmol) was added dropwise. The reaction mixture was allowed to stir -78 °C for 0.5 h and a THF solution of Comin's reagent (170 mg, 0.44 mmol) was added dropwise -78 °C. The reaction mixture was allowed to slowly warm to room temperature and stirred overnight. The reaction mixture was concentrated under reduced pressure and the crude residue was directly purified by flash column chromatography (SiO<sub>2</sub>; 95:5 Hexanes:EA) to afford compound **2g-NHBoc** (120 mg, 93%) as a white solid.

**<sup>1</sup>H NMR** (600 MHz, CDCl<sub>3</sub>)  $\delta$  7.84 (s, 1H), 7.31 (s, 1H), 6.53 (s, 1H), 1.53 (s, 9H).

**<sup>13</sup>C NMR** (151 MHz, CDCl<sub>3</sub>)  $\delta$  162.56 (d, J = 241.5 Hz), 159.85 (d, J = 11.6 Hz), 152.10 (d, J = 18.3 Hz), 151.33, 118.56 (q, J = 321.0 Hz), 101.70 (d, J = 5.4 Hz), 96.37 (d, J = 40.9 Hz), 82.62, 28.11.

**HRMS** (*m/z*): (ESI) calc'd for [M+Na]<sup>+</sup>: 383.0295, found: 383.0292.

### Compound 2g

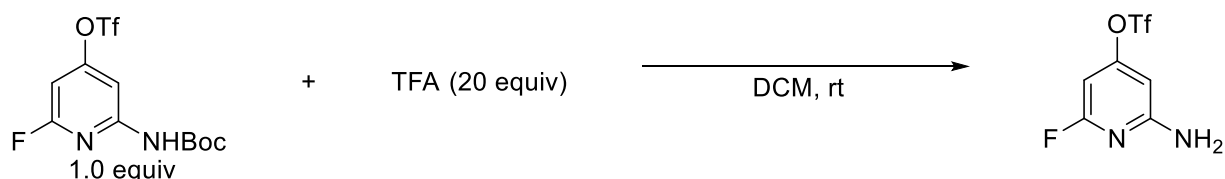

A 20mL vial was charged with DCM (0.5 mL), compound **2g-NHBoc** (90 mg, 0.25 mmol) and a magnetic stir bar. At room temperature, TFA (380  $\mu$ L, 5.0 mmol, 20 equiv) was added dropwise. The reaction mixture was allowed to stir overnight before quenched with NaHCO<sub>3</sub> and extracted with DCM. The reaction mixture was concentrated under reduced pressure and purified by flash column chromatography (SiO<sub>2</sub>; 75:25 Hexanes:EA) to afford compound **2g** (59 mg, 90%) as a white solid.

**<sup>1</sup>H NMR** (600 MHz, CDCl<sub>3</sub>)  $\delta$  6.24 (s, 1H), 6.17 (s, 1H), 4.89 (s, 2H).

**<sup>13</sup>C NMR** (151 MHz, CDCl<sub>3</sub>)  $\delta$  163.98 (d, J = 239.1 Hz), 159.80 (d, J = 12.9 Hz), 158.67 (d, J = 20.2 Hz), 118.70 (q, J = 320.9 Hz), 96.74 (d, J = 5.5 Hz), 91.01 (d, J = 42.0 Hz).

**HRMS** (*m/z*): (ESI) calc'd for [2M+K]<sup>+</sup>: 558.9390, found: 558.9377.

### Compound 2i

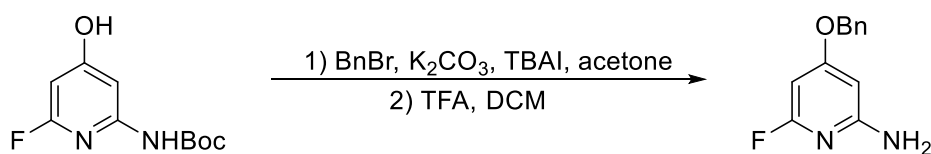

A 20mL vial was charged with dry acetone (2.0 mL), compound **2g-NHBoc** (69 mg, 0.30 mmol), TBAI (5.5 mg, 0.015 mmol, 5 mol%), BnBr (38  $\mu$ L, 0.32 mmol, 1.1 equiv),  $K_2CO_3$  (62 mg, 0.45 mmol, 3.0 equiv) and a magnetic stir bar. The reaction mixture was allowed to stir overnight and extracted with EA. The reaction mixture was filtered, concentrated under reduced pressure, and redissolved in DCM (0.5 mL). At room temperature, TFA (460  $\mu$ L, 6.0 mmol, 20 equiv) was added dropwise. The reaction mixture was allowed to stir overnight before quenched with  $NaHCO_3$  and extracted with DCM. The reaction mixture was concentrated under reduced pressure and purified by flash column chromatography ( $SiO_2$ ; 75:25 Hexanes:EA) to afford compound **2i** (56 mg, 85%) as a white solid.

$^1H$  NMR (600 MHz,  $CDCl_3$ )  $\delta$  7.43 – 7.32 (m, 5H), 5.88 (app-s, 2H), 5.04 (app-s, 2H), 4.51 (s, 2H).

$^{13}C$  NMR (151 MHz,  $CDCl_3$ )  $\delta$  169.97 (d,  $J = 12.7$  Hz), 164.68 (d,  $J = 233.0$  Hz), 158.37 (d,  $J = 21.0$  Hz), 135.73, 128.86, 128.52, 127.57, 90.36 (d,  $J = 4.2$  Hz), 85.66 (d,  $J = 40.9$  Hz), 70.38.

HRMS ( $m/z$ ): (ESI) calc'd for  $[M+Na]^+$ : 241.0747, found: 241.0736.

### Compound 2j

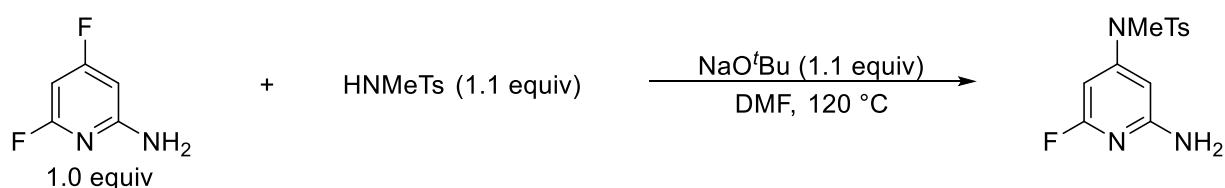

In a nitrogen-filled glovebox, a 1-dram vial was charged sequentially with 4,6-difluoropyridin-2-amine (33 mg, 0.25 mmol, 1.0 equiv), N-tosyl-N,N-dimethylbenzenesulfonamide (55 mg, 0.27 mmol, 1.1 equiv), ( $NaOtBu$ ) (24 mg, 0.27 mmol, 1.1 equiv), DMF (2.5 mL), and a magnetic stir bar. The vial was capped and removed from the glovebox. The reaction was heated at 120  $^{\circ}C$  for 24 h. The crude material was extracted with EA/ $H_2O$  5 times to remove residual DMF, concentrated in vacuo, and purified by flash column chromatography ( $SiO_2$ ; 95:5 DCM:EA) to afford compound **2j** (58 mg, 78%) as a white solid.

[Return to table of contents]

**<sup>1</sup>H NMR** (600 MHz, CDCl<sub>3</sub>) δ 7.55 (d, J = 7.9 Hz, 2H), 7.29 (d, J = 7.8 Hz, 2H), 6.35 (s, 1H), 6.04 (s, 1H), 4.59 (s, 2H), 3.20 (s, 3H), 2.43 (s, 3H).

**<sup>13</sup>C NMR** (151 MHz, CDCl<sub>3</sub>) δ 163.70 (d, J = 234.8 Hz), 157.66 (d, J = 19.6 Hz), 154.08 (d, J = 11.4 Hz), 144.42, 133.73, 129.76, 127.39, 98.75 (d, J = 4.4 Hz), 91.48 (d, J = 40.5 Hz), 36.61, 21.58.

**HRMS** (*m/z*): (ESI) calc'd for [M+ACN+H]<sup>+</sup>: 337.1129, found: 337.1120.

### Compound 2o and 2r

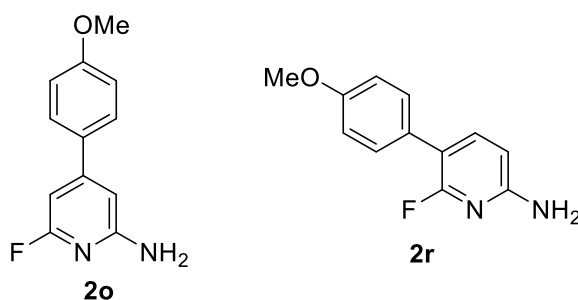

According to **Condition C**, 1-bromo-4-methoxybenzene (220 mg, 1.2 mmol) was used as the aryl bromide coupling partner, and the product was purified by flash column chromatography (SiO<sub>2</sub>; 50:50 Hexanes:ether) to afford compound **2o** (57 mg, 26%) as a yellow solid and **2r** (90 mg, 41%) as a yellow solid.

### Compound 2o

**<sup>1</sup>H NMR** (600 MHz, CDCl<sub>3</sub>) δ 7.55 – 7.50 (m, 2H), 7.00 – 6.96 (m, 2H), 6.49 (s, 1H), 6.42 (s, 1H), 4.54 (s, 2H), 3.86 (s, 3H).

**<sup>13</sup>C NMR** (151 MHz, CDCl<sub>3</sub>) δ 164.14 (d, J = 235.9 Hz), 160.80, 157.86 (d, J = 18.1 Hz), 154.92 (d, J = 9.1 Hz), 130.40 (d, J = 3.6 Hz), 128.24, 114.52, 102.01 (d, J = 3.9 Hz), 95.29 (d, J = 37.2 Hz), 55.55.

**HRMS** (*m/z*): (ESI) calc'd [M+ACN+H]<sup>+</sup>: 260.1193, found: 260.1187.

### Compound 2r

**<sup>1</sup>H NMR** (600 MHz, CDCl<sub>3</sub>) δ 7.62 (t, J = 10.1 Hz, 1H), 7.45 (d, J = 8.2 Hz, 2H), 6.98 (d, J = 8.3 Hz, 2H), 6.43 (d, J = 8.0 Hz, 1H), 4.61 (s, 2H), 3.86 (s, 3H).

$^{13}\text{C}$  NMR (151 MHz,  $\text{CDCl}_3$ )  $\delta$  159.38 (d,  $J = 238.8$  Hz), 158.84, 156.10 (d,  $J = 16.5$  Hz), 142.03 (d,  $J = 5.2$  Hz), 129.42 (d,  $J = 3.2$  Hz), 127.07 (d,  $J = 5.0$  Hz), 114.03, 111.34 (d,  $J = 27.1$  Hz), 105.34 (d,  $J = 4.4$  Hz), 55.33.

HRMS ( $m/z$ ): (ESI) calc'd  $[\text{M}+\text{Na}]^+$ : 241.0747, found: 241.0746.

### Compound 2p and 2s

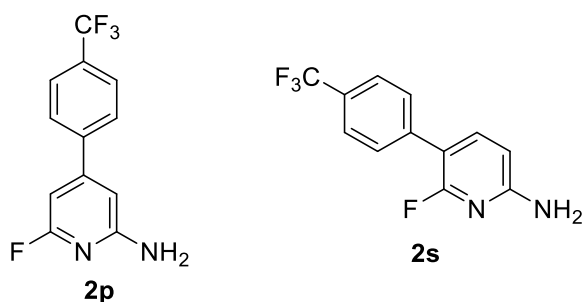

According to **Condition C**, 1-bromo-4-trifluoromethylbenzene (270 mg, 1.2 mmol) was used as the aryl bromide coupling partner, and the product was purified by flash column chromatography ( $\text{SiO}_2$ ; 80:20 Hexanes:EA) to afford compound **2p** (87 mg, 34%) as a yellow solid and **2s** (77 mg, 30%) as a yellow solid.

### Compound 2p

$^1\text{H}$  NMR (600 MHz,  $\text{CDCl}_3$ )  $\delta$  7.74 (d,  $J = 8.1$  Hz, 2H), 7.68 (d,  $J = 8.1$  Hz, 2H), 6.54 (s, 1H), 6.46 (s, 1H), 4.72 (s, 2H).

$^{13}\text{C}$  NMR (151 MHz,  $\text{CDCl}_3$ )  $\delta$  163.94 (d,  $J = 237.1$  Hz), 157.98 (d,  $J = 17.8$  Hz), 153.76 (d,  $J = 8.8$  Hz), 141.59, 131.23 (q,  $J = 32.7$  Hz), 127.34, 125.96 (q,  $J = 3.7$  Hz), 123.94 (q,  $J = 272.4$  Hz), 102.73 (d,  $J = 4.3$  Hz), 95.74 (d,  $J = 37.6$  Hz).

HRMS ( $m/z$ ): (ESI) calc'd  $[2\text{M}+\text{ACN}+\text{Na}]^+$ : 576.1406, found: 576.1433.

### Compound 2s

$^1\text{H}$  NMR (600 MHz,  $\text{CDCl}_3$ )  $\delta$  7.70 – 7.65 (m, 3H), 7.63 (t,  $J = 8.1$  Hz, 2H), 6.47 (dd,  $J = 8.2, 1.6$  Hz, 1H), 4.83 (s, 2H).

**<sup>13</sup>C NMR** (151 MHz, CDCl<sub>3</sub>) δ 159.70 (d, J = 239.8 Hz), 157.42 (d, J = 17.3 Hz), 142.22 (d, J = 4.6 Hz), 138.48 (d, J = 5.3 Hz), 129.19 (q, J = 32.6 Hz), 128.57 (d, J = 3.6 Hz), 125.59 (q, J = 3.7 Hz), 124.33 (q, J = 272.0 Hz), 110.00 (d, J = 26.9 Hz), 105.67 (d, J = 4.3 Hz).

**HRMS (m/z):** (ESI) calc'd [M+ACN+Na]<sup>+</sup>: 320.0782, found: 320.0772.

### Compound 2q

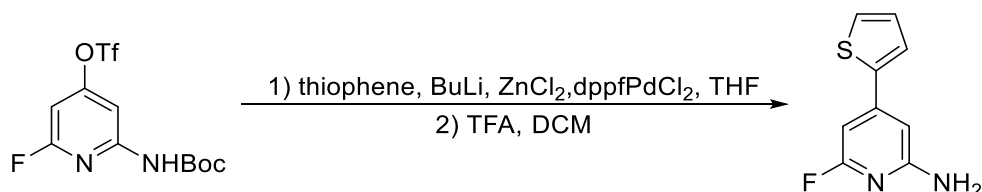

An oven-dried flask was charged with dry THF (3.0 mL), thiophene (76 mg, 0.90 mmol) and a magnetic stir bar. At -78 °C, BuLi (2.5M solution, 400 μL, 1.0 mmol, 1.1 equiv) was added dropwise. The reaction mixture was allowed to stir -78 °C for 0.5 h, and a THF suspension of ZnCl<sub>2</sub> (240 mg, 1.8 mmol, 2.0 equiv) was added dropwise -78 °C. The reaction mixture was allowed to slowly warm to 0 °C, stirred for 0.5 h, and brought into the glovebox. In a nitrogen-filled glovebox, a 20mL vial was charged sequentially dppfPdCl<sub>2</sub> (11 mg, 0.015 mmol, 5.0 mol%), compound **2g-NHBoc** (110 mg, 0.3 mmol), and the arylzinc solution. The vial was capped and removed from the glovebox. The reaction was heated at 65 °C for 24 h, filtered, concentrated under reduced pressure, and redissolved in DCM (2.0 mL). At room temperature, TFA (766 μL, 10.0 mmol, 10.0 equiv) was added dropwise. The reaction mixture was allowed to stir overnight before quenched with NaHCO<sub>3</sub> and extracted with DCM. The reaction mixture was concentrated under reduced pressure and purified by flash column chromatography (SiO<sub>2</sub>; 75:25 Hexanes:EA) to afford compound **2q** (36 mg, 62%) as a yellow solid.

**<sup>1</sup>H NMR** (600 MHz, CDCl<sub>3</sub>) δ 7.50 – 7.37 (m, 2H), 7.13 (app-s, 1H), 6.56 (s, 1H), 6.49 (s, 1H), 4.34 (s, 2H).

**<sup>13</sup>C NMR** (151 MHz, CDCl<sub>3</sub>) δ 164.10 (d, J = 236.3 Hz), 157.98 (d, J = 17.9 Hz), 147.86 (d, J = 9.5 Hz), 140.96 (d, J = 4.0 Hz), 128.36, 127.24, 125.70, 100.98 (d, J = 3.9 Hz), 94.31 (d, J = 38.5 Hz).

**HRMS (m/z):** (ESI) calc'd [M+K]<sup>+</sup>: 232.9946, found: 232.9952.



### 6.3 DIP-Ad-SEGPHOS Synthesis

#### diethyl (7-((3*r*,5*r*,7*r*)-adamantan-1-yl)benzo[d][1,3]dioxol-5-yl)phosphonate

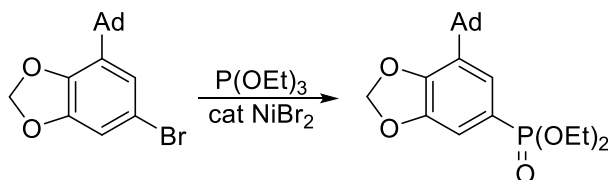

**Adapted from a reported procedure<sup>3</sup>:** 4-((3*r*,5*r*,7*r*)-adamantan-1-yl)-6-bromobenzo[d][1,3]dioxole<sup>4</sup> (4.7 g, 14 mmol) and nickel dibromide (180 mg, 1.4 mmol, 10 mol%) were placed in a two-necked flask provided with a distillation apparatus and a dropping funnel. The suspension was heated at 160 °C, after what triethylphosphite (2.9 mL, 17 mmol, 1.2 equiv) was added dropwise over 1 h. The reaction mixture was stirred at 160 °C for 1 h. The ethyl bromide formed was continuously distilled all along the reaction. After cooling down the mixture, 50 mL of diethyl ether and 50 mL of ethyl acetate were added and the precipitate was filtered off. The filtrate was concentrated under reduced pressure and the crude oil was purified by flash column chromatography (SiO<sub>2</sub>; 50:50 hexanes:EA) to afford the target compound (4.2 g, 76%) as a yellow oil. The NMR spectra of the target compound matched those reported in the literature.<sup>5</sup>

#### Ad-SEGPHOS-POEt<sub>2</sub>

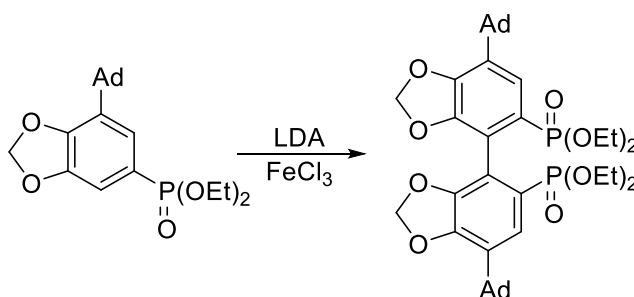

**Adapted from a reported procedure<sup>3</sup>:** To a solution of diethyl (7-((3*r*,5*r*,7*r*)-adamantan-1-yl)benzo[d][1,3]dioxol-5-yl)phosphonate (4.8 g, 12 mmol) in dry THF (15 mL) was added dropwise a solution of freshly prepared LDA (13 mmol, 1.1 equiv) at -78 °C. The reaction mixture was stirred at -78 °C for 15 minutes and at -15°C for 15 minutes. The mixture was cooled to -78 °C and a THF solution of anhydrous FeCl<sub>3</sub> (2.7 g, 16 mmol, 1.3 equiv) was added dropwise. The reaction temperature

was allowed to rise to r.t and the mixture was stirred overnight. The solution was concentrated in vacuum, and the brown residue was diluted with CH<sub>2</sub>Cl<sub>2</sub> (50 mL) and treated with 50 mL of 2 M aqueous NaOH. After stirring for 1 h, the resulting suspension was filtered on celite. The organic layer was washed with water and brine, dried over MgSO<sub>4</sub>, filtered, and concentrated under reduced pressure. The obtained brown solid was purified by flash column chromatography (SiO<sub>2</sub>; 90:10 DCM:MeOH) to afford the target compound (4.1 g, 87%) as white solid. The NMR spectra of the target compound matched those reported in the literature.<sup>5</sup>

### Ad-SEGPHOS-POCl<sub>2</sub>

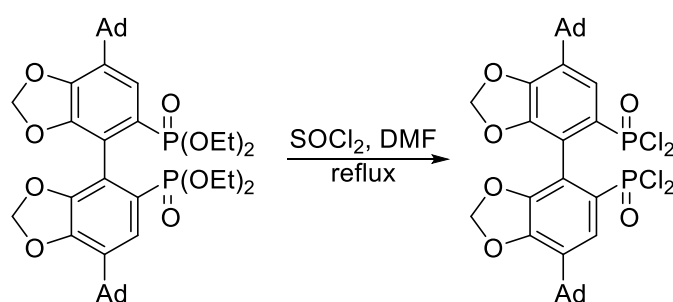

**Adapted from a reported procedure<sup>6</sup>:** In a nitrogen-filled glovebox, an oven dried round-bottom flask (50 ml) was charged Ad-SEGPHOS-POEt<sub>2</sub> (2.0 g, 2.5 mmol) and a magnetic stir bar. A reflux condenser was attached to the flask. Thionyl chloride was added to the flask via syringe (18 mL, 250 mmol), followed by dropwise addition of DMF (1.9 ml, 25 mmol). The solution was allowed to reflux (96 °C) for 17 h. Upon completion, the flask was allowed to cool to room temperature, and the solvents were distilled away under high vacuum to yield a brown solid. The flask was taken into the glovebox, and the solid was redissolved in DCM and dried under high vacuum for 48 h to yield the title compound as a pale solid (1.8 g, 98% yield). Note: The crude solid was used directly for the next step without further purification.

<sup>1</sup>H NMR (600 MHz, CDCl<sub>3</sub>) δ 7.58 (d, J = 22.6 Hz, 2H), 6.09 (d, J = 1.5 Hz, 2H), 6.03 (d, J = 1.4 Hz, 2H), 2.13 – 2.08 (m, 6H), 2.08 – 2.04 (m, 12H), 1.82 – 1.75 (m, 12H).

<sup>31</sup>P NMR (243 MHz, CDCl<sub>3</sub>) δ 33.68.

HRMS (*m/z*): (ESI) calc'd [M+Na]<sup>+</sup>: 765.0633, found: 765.0633.

### Ad-SEGP<sub>2</sub>HOS-POAr<sub>2</sub>

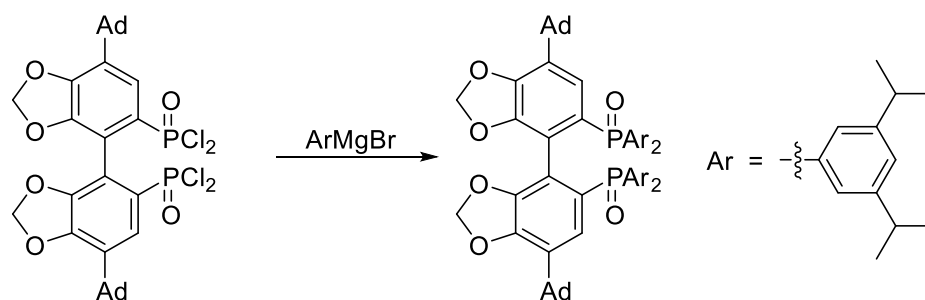

**Adapted from a reported procedure<sup>6</sup>:** In a nitrogen-filled glovebox, a 20 ml vial was charged with Mg turnings (350 mg, 14 mmol), 1-bromo-3,5-diisopropylbenzene (2.9 g, 12 mmol), a crystal of iodine, THF (5.0 mL) and a magnetic stir bar. The vial was capped and stirred at 65 °C for 3 h. The Grignard was then brought back into the back and was added dropwise to a 20 ml vial containing a THF solution (5 mL) of Ad-SEGP<sub>2</sub>HOS-POCl<sub>2</sub> (890 mg, 1.2 mmol) at -35 °C. The reaction was heated at 65 °C for 24 h. Upon completion, the reaction was allowed to cool to room temperature, quenched with NH<sub>4</sub>Cl (aq), extracted with EA and concentrated under high vacuum. The obtained crude solid was purified by flash column chromatography (SiO<sub>2</sub>; 70:30 Hexanes:EA) to afford the target compound (1.1 g, 70%) as white solid.

<sup>1</sup>H NMR (600 MHz, CDCl<sub>3</sub>) δ 7.37 (dd, J = 11.9, 1.7 Hz, 4H), 7.26 (dd, J = 12.3, 1.7 Hz, 4H), 7.13 (s, 2H), 7.03 (s, 2H), 6.78 (d, J = 15.2 Hz, 2H), 5.82 (d, J = 1.8 Hz, 2H), 5.61 (d, J = 1.8 Hz, 2H), 2.87 (hept, J = 6.9 Hz, 4H), 2.69 (hept, J = 6.9 Hz, 4H), 1.95 (app-s, 6H), 1.87 – 1.79 (m, 12H), 1.71 – 1.62 (m, 12H), 1.20 (dd, J = 6.9, 4.8 Hz, 24H), 1.05 (dd, J = 8.5, 6.9 Hz, 24H).

<sup>31</sup>P NMR (243 MHz, CDCl<sub>3</sub>) δ 30.50.

HRMS (*m/z*): (ESI) calc'd [M+H]<sup>+</sup>: 1247.7381, found: 1247.7404.

### DIP-Ad-SEGP<sub>2</sub>HOS (Ad-SEGP<sub>2</sub>HOS-PAR<sub>2</sub>)

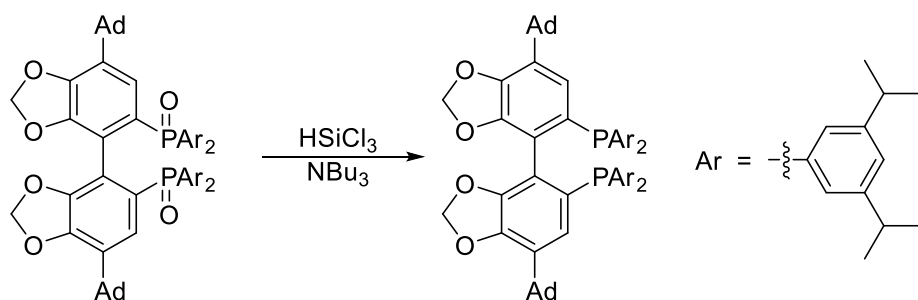

**Adapted from a reported procedure<sup>6</sup>:** In a nitrogen-filled glovebox, a 40 ml vial was charged with **Ad-SEGPHOS-POAr<sub>2</sub>** (2.0 g, 1.6 mmol) and a magnetic stir bar. Dry mesitylene (5.0 ml) and dry Bu<sub>3</sub>N (4.6 mL, 19 mmol) were added to the vial. Trichlorosilane (1.9 mL, 19 mmol) was added dropwise to the solution. Once the evolution of gas ceased, the vial was sealed with a Teflon-lined cap and placed in a 120 °C heating block. After 24 h, the vial was removed from the heating block and the reaction mixture was transferred into a 250 mL round-bottom flask placed in an ice bath. Under a stream of nitrogen and vigorous stirring, an aqueous solution of NaOH (25%, 10 ml) was added to the flask dropwise. The reaction was stirred at room temperature for 1 h, quenched with HCl (aq), extracted with EA and concentrated under high vacuum. The obtained crude solid was purified by flash column chromatography (SiO<sub>2</sub>; 97:3 Hexanes:EA) to afford the target compound (1.5 g, 83%) as white solid.

**<sup>1</sup>H NMR** (600 MHz, CDCl<sub>3</sub>) δ 7.26 (s, 1H), 7.00 – 6.96 (m, 7H), 6.95 – 6.93 (m, 2H), 6.91 – 6.89 (m, 2H), 6.63 – 6.58 (m, 2H), 5.74 (d, J = 1.7 Hz, 2H), 5.14 (d, J = 1.7 Hz, 2H), 2.80 (hept, J = 6.9 Hz, 4H), 2.72 (hept, J = 6.9 Hz, 4H), 1.95 – 1.91 (m, 6H), 1.87 – 1.78 (m, 12H), 1.72 – 1.61 (m, 12H), 1.17 (dd, J = 6.9, 3.7 Hz, 24H), 1.12 (dd, J = 6.9, 5.9 Hz, 24H).

**<sup>31</sup>P NMR** (243 MHz, CDCl<sub>3</sub>) δ -13.90.

**HRMS (m/z):** (ESI) calc'd [M+H]<sup>+</sup>: 1215.7483, found: 1215.7477.

## 7. Scope of Hydroamination

### Compound 3ab

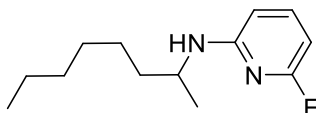

From *cis*-4-octene: According to **Condition A** at 90 °C for 4.5 h. *cis*-4-octene (78  $\mu$ L, 0.50 mmol) and aminopyridine **2b** (11 mg, 0.10 mmol) was allowed to react, and the product was purified by flash column chromatography (SiO<sub>2</sub>; 97.5:2.5 hexanes:EA) to afford compound **3ab** (20 mg, 91%) as a yellow oil. The regioselectivity of the reaction was determined to be 91% by GC.

From *trans*-4-octene: According to **Condition A** at 90 °C for 44 h. *trans*-4-octene (78  $\mu$ L, 0.50 mmol) and aminopyridine **2b** (11 mg, 0.10 mmol) was allowed to react, and the product was purified by flash column chromatography (SiO<sub>2</sub>; 97.5:2.5 hexanes:EA) to afford compound **3ab** (20 mg, 91%) as a yellow oil. The regioselectivity of the reaction was determined to be 90% by GC. Note: 4-NMe<sub>2</sub>-3,5-DIP-MeOBIPHEP was used as the ligand instead of DIP-Ad-SEGPPOS.

From an equimolar mixture of *cis*-4-octene, *cis*-3-octene, and *cis*-2-octene: According to **Condition A** at 90 °C for 5 h. *cis*-4-octene (26  $\mu$ L, 0.17 mmol), *cis*-3-octene (26  $\mu$ L, 0.17 mmol), *cis*-2-octene (26  $\mu$ L, 0.17 mmol) and aminopyridine **2b** (11 mg, 0.10 mmol) was allowed to react, and the product was purified by flash column chromatography (SiO<sub>2</sub>; 97.5:2.5 hexanes:EA) to afford compound **3ab** (20 mg, 89%) as a yellow oil. The regioselectivity of the reaction was determined to be 92% by GC.

<sup>1</sup>H NMR (600 MHz, CDCl<sub>3</sub>)  $\delta$  7.42 (q, J = 8.1 Hz, 1H), 6.14 (dd, J = 8.1, 2.4 Hz, 1H), 6.07 (dd, J = 7.8, 2.3 Hz, 1H), 4.38 (s, 1H), 3.70 (h, J = 6.4 Hz, 1H), 1.56 – 1.41 (m, 2H), 1.40 – 1.31 (m, 2H), 1.31 – 1.22 (m, 6H), 1.17 (d, J = 6.6 Hz, 3H), 0.87 (t, J = 6.8 Hz, 3H).

<sup>13</sup>C NMR (151 MHz, CDCl<sub>3</sub>)  $\delta$  163.43 (d, J = 236.0 Hz), 157.75 (d, J = 16.9 Hz), 141.71 (d, J = 8.7 Hz), 102.54 (d, J = 4.0 Hz), 95.09 (d, J = 36.6 Hz), 47.48, 37.21, 31.90, 29.37, 26.08, 22.71, 20.90, 14.17.

<sup>19</sup>F NMR (565 MHz, CDCl<sub>3</sub>)  $\delta$  -69.72.

HRMS (*m/z*): (ESI) calc'd [M+H]<sup>+</sup>: 225.1762, found: 225.1758.

### Compound 3bb

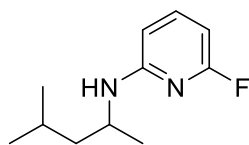

According to **Condition A** at 90 °C for 14 h. alkene **1b** (92  $\mu$ L, 0.75 mmol) and aminopyridine **2b** (11 mg, 0.10 mmol) was allowed to react, and the product was purified by flash column chromatography (SiO<sub>2</sub>; 97.5:2.5 hexanes:EA) to afford compound **3bb** (16 mg, 80%) as a yellow oil. The regioselectivity of the reaction was determined to be 93% by GC. Note: 4-NMe<sub>2</sub>-3,5-DIP-MeOBIPHEP was used as the ligand instead of DIP-Ad-SEGPHOS.

<sup>1</sup>H NMR (600 MHz, CDCl<sub>3</sub>)  $\delta$  7.44 (q, J = 8.1 Hz, 1H), 6.15 (d, J = 8.1 Hz, 1H), 6.08 (d, J = 7.7 Hz, 1H), 4.33 (s, 1H), 3.79 (h, J = 6.4 Hz, 1H), 1.75 – 1.66 (m, 1H), 1.47 – 1.37 (m, 1H), 1.33 – 1.22 (m, 1H), 1.17 (d, J = 6.3 Hz, 3H), 0.92 (dd, J = 12.8, 6.6 Hz, 6H).

<sup>13</sup>C NMR (151 MHz, CDCl<sub>3</sub>)  $\delta$  163.45 (d, J = 236.0 Hz), 157.73 (d, J = 16.8 Hz), 141.77 (d, J = 8.7 Hz), 102.47 (d, J = 3.9 Hz), 95.15 (d, J = 36.8 Hz), 46.82, 45.65, 25.16, 22.86, 22.82, 21.36.

<sup>19</sup>F NMR (565 MHz, CDCl<sub>3</sub>)  $\delta$  -69.67.

HRMS (*m/z*): (ESI) calc'd [M+H]<sup>+</sup>: 197.1449, found: 197.1446.

### Compound 3cb

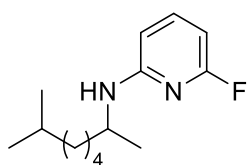

According to **Condition A** at 90 °C for 24 h. alkene **1c** (94 mg, 0.75 mmol) and aminopyridine **2b** (11 mg, 0.10 mmol) was allowed to react, and the product was purified by flash column chromatography (SiO<sub>2</sub>; 97.5:2.5 hexanes:EA) to afford compound **3cb** (20 mg, 84%) as a yellow oil. The regioselectivity of the reaction was determined to be 85% by GC. Note: 4-NMe<sub>2</sub>-3,5-DIP-MeOBIPHEP was used as the ligand instead of DIP-Ad-SEGPHOS.

[Return to table of contents]

**<sup>1</sup>H NMR** (600 MHz, CDCl<sub>3</sub>) δ 7.36 (q, J = 8.1 Hz, 1H), 6.07 (d, J = 8.1 Hz, 1H), 6.01 (d, J = 7.7 Hz, 1H), 4.31 (d, J = 8.4 Hz, 1H), 3.70 – 3.55 (m, 1H), 1.48 – 1.36 (m, 3H), 1.31 – 1.19 (m, 4H), 1.13 – 1.05 (m, 5H), 0.78 (d, J = 6.6 Hz, 6H).

**<sup>13</sup>C NMR** (151 MHz, CDCl<sub>3</sub>) δ 163.33 (d, J = 236.0 Hz), 157.63 (d, J = 16.8 Hz), 141.60 (d, J = 8.7 Hz), 102.40 (d, J = 4.4 Hz), 95.00 (d, J = 36.9 Hz), 47.37, 38.92, 37.14, 27.91, 27.34, 26.25, 22.61 (two carbons), 20.81.

**<sup>19</sup>F NMR** (565 MHz, CDCl<sub>3</sub>) δ -69.74.

**HRMS** (*m/z*): (ESI) calc'd [2M+K]<sup>+</sup>: 515.3322, found: 515.3313.

### Compound 3db

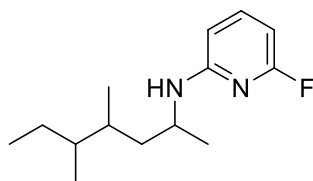

According to **Condition A** at 100 °C for 13 h. 3-methyl-4-methyleneheptane (250 mg, 2.0 mmol) and aminopyridine **2b** (11 mg, 0.10 mmol) was allowed to react, and the product was purified by flash column chromatography (SiO<sub>2</sub>; 97.5:2.5 hexanes:EA) to afford compound **3db** (19 mg, 80%) as a yellow oil. The regioselectivity of the reaction was determined to be 95% by GC. The d.r. of the product was determined to be 7:17:16:10 by GC. Notes: Contain 4% inseparable isomers.

**<sup>1</sup>H NMR** (600 MHz, CDCl<sub>3</sub>) δ 7.50 – 7.42 (m, 1H), 6.20 – 6.13 (m, 1H), 6.13 – 6.05 (m, 1H), 4.39 (s, 1H), 4.02 – 3.59 (m, 1H), 1.69 – 1.53 (m, 1H), 1.46 – 1.26 (m, 4H), 1.23 – 1.18 (m, 3H), 1.18 – 1.08 (m, 1H), 0.98 – 0.88 (m, 3H), 0.88 – 0.76 (m, 6H).

**<sup>13</sup>C NMR** (151 MHz, CDCl<sub>3</sub>) δ 163.49 (d, J = 235.8 Hz, all diastereomers), 157.65 (d, J = 16.2 Hz, two diastereomers), 157.55 (d, J = 16.0 Hz, two diastereomers), 141.77 (d, J = 8.7 Hz, two diastereomers), 141.75 (d, J = 8.8 Hz, two diastereomers), 102.49 (d, J = 3.5 Hz, two diastereomers), 102.47 (d, J = 3.5 Hz, two diastereomers), 95.24 (d, J = 37.0 Hz, two diastereomers), 95.18 (d, J = 37.1 Hz, two diastereomers), 46.01 (two diastereomers), 45.72 (two diastereomers), 42.77 (two diastereomers), 40.55 (two diastereomers), 39.74 (two diastereomers), 38.68 (two diastereomers), 34.34 (two diastereomers), 33.33 (two diastereomers), 27.50 (two diastereomers), 25.71 (two

diastereomers), 21.03 (two diastereomers), 20.67 (two diastereomers), 16.89 (two diastereomers), 15.88 (two diastereomers), 14.63 (two diastereomers), 14.11 (two diastereomers), 12.38 (two diastereomers), 12.30 (two diastereomers).

**<sup>19</sup>F NMR** (565 MHz, CDCl<sub>3</sub>) δ -69.66 (diastereomer 1), -69.68 (diastereomer 2), -69.70 (diastereomer 3), -69.72 (diastereomer 4).

**HRMS (*m/z*):** (ESI) calc'd [M+H]<sup>+</sup>: 239.1918, found: 239.1919.

### Compound 3eb

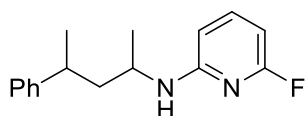

According to **Condition A** at 90 °C for 24 h. alkene **1e** (73 mg, 0.50 mmol) and aminopyridine **2b** (11 mg, 0.10 mmol) was allowed to react, and the product was purified by flash column chromatography (SiO<sub>2</sub>; 97.5:2.5 hexanes:EA) to afford compound **3eb** (22 mg, 86%) as a yellow oil. The regioselectivity of the reaction was determined to be >95% by GC. The d.r. of the product was determined to be 1:1 by GC.

**<sup>1</sup>H NMR** (600 MHz, CDCl<sub>3</sub>) δ 7.42 (p, J = 8.3 Hz, 2H, both diastereomers), 7.35 (t, J = 7.6 Hz, 2H, diastereomer 1), 7.32 – 7.28 (m, 2H, diastereomer 2), 7.27 – 7.20 (m, 4H, both diastereomers), 7.18 (d, J = 7.5 Hz, 2H, both diastereomers), 6.12 (ddd, J = 8.2, 6.4, 2.3 Hz, 2H, both diastereomer), 5.98 (dd, J = 8.0, 2.4 Hz, 1H, diastereomer 1), 5.94 (dd, J = 8.1, 2.4 Hz, 1H, diastereomer 2), 4.38 (d, J = 8.8 Hz, 2H, both diastereomers), 3.63 (hept, J = 6.9 Hz, 1H, diastereomer 1), 3.56 (h, J = 6.5, 5.9 Hz, 1H, diastereomer 2), 3.01 – 2.92 (m, 1H, diastereomer 2), 2.91 – 2.82 (m, 1H, diastereomer 1), 1.99 – 1.90 (m, 1H, diastereomer 1), 1.86 – 1.75 (m, 2H, both diastereomers), 1.74 – 1.65 (m, 1H, diastereomer 2), 1.31 (dd, J = 8.9, 6.9 Hz, 6H, both diastereomers), 1.24 (d, J = 6.4 Hz, 3H, diastereomer 1), 1.17 (d, J = 6.4 Hz, 3H, diastereomer 2).

**<sup>13</sup>C NMR** <sup>13</sup>C NMR (151 MHz, CDCl<sub>3</sub>) δ 163.38 (d, J = 236.1 Hz, diastereomer 1), 163.36 (d, J = 236.0 Hz, diastereomer 2), 157.66 (d, J = 16.7 Hz, diastereomer 1), 157.51 (d, J = 16.8 Hz, diastereomer 2), 146.92 (diastereomer 1), 146.79 (diastereomer 2), 141.76 (d, J = 8.8 Hz, diastereomer 1), 141.73 (d, J = 8.7 Hz, diastereomer 2), 128.68 (diastereomer 1), 128.59 (diastereomer 2), 127.19 (diastereomer 1), 127.04 (diastereomer 2), 126.36 (diastereomer 1), 126.29 (diastereomer 2), 102.39 (d, J = 4.3 Hz,



diastereomer 1), 102.32 (d,  $J = 3.9$  Hz, diastereomer 2), 95.29 (d,  $J = 36.7$  Hz, both diastereomers), 46.25 (diastereomer 1), 45.94 (diastereomer 2), 45.76 (diastereomer 1), 45.74 (diastereomer 2), 37.13 (diastereomer 1), 36.90 (diastereomer 2), 22.88 (diastereomer 1), 22.67 (diastereomer 2), 21.38 (diastereomer 1), 21.05 (diastereomer 2).

$^{19}\text{F}$  NMR (565 MHz,  $\text{CDCl}_3$ )  $\delta$  -69.72 (diastereomer 1), -69.78 (diastereomer 2).

HRMS ( $m/z$ ): (ESI) calc'd  $[2\text{M}+\text{ACN}+\text{Na}]^+$ : 580.3222, found: 580.3239.

### Compound 3fb

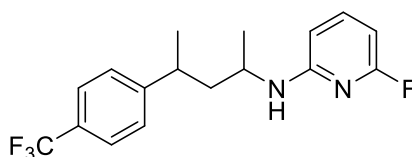

According to **Condition A** at 90 °C for 48 h. alkene **1f** (110 mg, 0.50 mmol) and aminopyridine **2b** (11 mg, 0.10 mmol) was allowed to react, and the product was purified by flash column chromatography ( $\text{SiO}_2$ ; 97.5:2.5 hexanes:EA) to afford compound **3fb** (29 mg, 88%) as a yellow oil. The regioselectivity of the reaction was determined to be >95% by GC. The d.r. of the product was determined to be 1:1 by GC.

$^1\text{H}$  NMR (600 MHz,  $\text{CDCl}_3$ )  $\delta$  7.53 – 7.30 (m, 10H, both diastereomers), 6.16 – 6.04 (m, 2H, both diastereomers), 6.00 – 5.88 (m, 2H, both diastereomers), 4.32 (dd,  $J = 14.6, 9.0$  Hz, 2H, both diastereomers), 3.65 (p,  $J = 7.0$  Hz, 1H, diastereomer 1), 3.51 (p,  $J = 6.9$  Hz, 1H, diastereomer 2), 2.99 (h,  $J = 7.2$  Hz, 1H, diastereomer 2), 2.92 (h,  $J = 7.1$  Hz, 1H, diastereomer 1), 1.91 (dt,  $J = 14.7, 7.6$  Hz, 1H, diastereomer 1), 1.78 (t,  $J = 7.1$  Hz, 2H, both diastereomers), 1.71 – 1.63 (m, 1H, diastereomer 2), 1.29 (dd,  $J = 10.0, 6.9$  Hz, 6H, both diastereomers), 1.20 (d,  $J = 6.4$  Hz, 3H, diastereomer 2), 1.13 (d,  $J = 6.3$  Hz, 3H, diastereomer 1).

$^{13}\text{C}$  NMR (151 MHz,  $\text{CDCl}_3$ )  $\delta$  163.43 (d,  $J = 236.1$  Hz, diastereomer 1), 163.39 (d,  $J = 236.2$  Hz, diastereomer 2), 157.54 (d,  $J = 14.0$  Hz, diastereomer 1), 157.42 (d,  $J = 14.0$  Hz, diastereomer 2), 147.98 (diastereomer 1), 147.69 (diastereomer 2), 141.88 (d,  $J = 8.5$  Hz, diastereomer 1), 141.79 (d,  $J = 8.6$  Hz, diastereomer 2), 130.61 (both diastereomers), 129.12 (diastereomer 1), 129.02 (diastereomer 2), 124.39 (q,  $J = 272.1$  Hz, diastereomer 1), 124.38 (q,  $J = 272.1$  Hz, diastereomer 1), 124.02 (q,  $J = 3.8$  Hz, diastereomer 2), 123.67 (q,  $J = 3.7$  Hz, diastereomer 1), 123.24 (q,  $J = 3.6$  Hz, diastereomer 2),

[Return to table of contents]

102.55 (d, J = 3.7 Hz, diastereomer 1), 102.37 (d, J = 3.7 Hz, diastereomer 2), 95.65 (d, J = 10.8 Hz, diastereomer 1), 95.41 (d, J = 10.7 Hz, diastereomer 2), 46.17 (diastereomer 2), 45.71 (diastereomer 1), 45.55 (both diastereomers), 37.13 (diastereomer 1), 36.88 (diastereomer 2), 22.71 (diastereomer 1), 22.42 (diastereomer 2), 21.54 (diastereomer 1), 21.17 (diastereomer 2).

$^{19}\text{F}$  NMR (565 MHz,  $\text{CDCl}_3$ )  $\delta$  -62.48 (diastereomer 1), -62.52 (diastereomer 2), -69.66 (diastereomer 1), -69.74 (diastereomer 2).

HRMS ( $m/z$ ): (ESI) calc'd  $[\text{M}+\text{Na}]^+$ : 349.1298, found: 349.1285.

### Compound 3gb

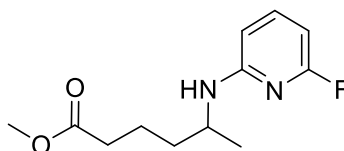

According to **Condition A** at 120 °C for 44 h. alkene **1g** (130 mg, 1.0 mmol) and aminopyridine **2b** (11 mg, 0.10 mmol) was allowed to react, and the product was purified by flash column chromatography ( $\text{SiO}_2$ ; 90:10 hexanes:EA) to afford compound **3gb** (14 mg, 58%) as a yellow oil. The regioselectivity of the reaction was determined to be 91% by GC. Note: 4-NMe<sub>2</sub>-3,5-DIP-MeOBIPHEP was used as the ligand instead of DIP-Ad-SEGPHOS. 3.75 mol%  $[\text{Ir}(\text{coe})_2\text{Cl}]_2$ , 9 mol% ligand, and 9 mol% NaBARF were used.

$^1\text{H}$  NMR (600 MHz,  $\text{CDCl}_3$ )  $\delta$  7.43 (q, J = 8.1 Hz, 1H), 6.15 (dd, J = 8.0, 2.4 Hz, 1H), 6.08 (dd, J = 7.8, 2.3 Hz, 1H), 4.38 (s, 1H), 3.79 (q, J = 6.4 Hz, 1H), 3.66 (s, 3H), 2.33 (t, J = 7.3 Hz, 2H), 1.77 – 1.63 (m, 2H), 1.59 – 1.46 (m, 2H), 1.20 (d, J = 6.4 Hz, 3H).

$^{13}\text{C}$  NMR (151 MHz,  $\text{CDCl}_3$ )  $\delta$  173.88, 163.31 (d, J = 236.1 Hz), 157.49 (d, J = 16.6 Hz), 141.60 (d, J = 8.5 Hz), 102.77 (d, J = 4.0 Hz), 95.18 (d, J = 36.9 Hz), 51.54, 46.96, 36.33, 33.79, 21.39, 20.84.

$^{19}\text{F}$  NMR (565 MHz,  $\text{CDCl}_3$ )  $\delta$  -69.70.

HRMS ( $m/z$ ): (ESI) calc'd  $[\text{M}+\text{H}]^+$ : 241.1347, found: 241.1346.

### Compound 3hb

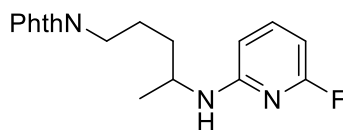

According to **Condition A** at 100 °C for 40 h. alkene **1h** (110 mg, 0.50 mmol) and aminopyridine **2b** (11 mg, 0.10 mmol) was allowed to react, and the product was purified by flash column chromatography (SiO<sub>2</sub>; 95:5 DCM:MeCN) to afford compound **3hb** (30 mg, 92%) as a yellow oil. The regioselectivity of the reaction was determined to be 93% by GC.

<sup>1</sup>H NMR (600 MHz, CDCl<sub>3</sub>) δ 7.82 (dd, J = 5.4, 3.0 Hz, 2H), 7.73 – 7.65 (m, 2H), 7.40 (q, J = 8.1 Hz, 1H), 6.14 (dd, J = 8.0, 2.3 Hz, 1H), 6.05 (dd, J = 7.7, 2.3 Hz, 1H), 4.42 (s, 1H), 3.83 (q, J = 6.5 Hz, 1H), 3.69 (t, J = 7.1 Hz, 2H), 1.85 – 1.69 (m, 2H), 1.60 – 1.48 (m, 2H), 1.17 (d, J = 6.4 Hz, 3H).

<sup>13</sup>C NMR (151 MHz, CDCl<sub>3</sub>) δ 168.54, 163.38 (d, J = 236.1 Hz), 157.54 (d, J = 17.0 Hz), 141.68 (d, J = 8.7 Hz), 134.04, 132.18, 123.32, 102.92 (d, J = 3.9 Hz), 95.28 (d, J = 36.9 Hz), 47.02, 37.95, 34.13, 25.40, 21.07.

<sup>19</sup>F NMR (565 MHz, CDCl<sub>3</sub>) δ -69.66.

HRMS (*m/z*): (ESI) calc'd [M+H]<sup>+</sup>: 328.1456, found: 328.1455.

### Compound 3ib

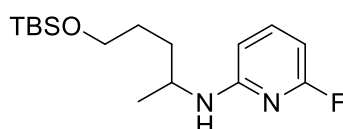

According to **Condition A** at 90 °C for 44 h. alkene **1i** (100 mg, 0.50 mmol) and aminopyridine **2b** (11 mg, 0.10 mmol) was allowed to react, and the product was purified by flash column chromatography (SiO<sub>2</sub>; 95:5 hexanes:EA) to afford compound **3ib** (16 mg, 50%) as a yellow oil. The regioselectivity of the reaction was determined to be 81% by GC. Note: 4-NMe<sub>2</sub>-3,5-DIP-MeOBIPHEP was used as the ligand instead of DIP-Ad-SEGPHOS. 3.75 mol% [Ir(coe)<sub>2</sub>Cl]<sub>2</sub>, 9 mol% ligand, and 9 mol% NaBARf were used.

[Return to table of contents]

**<sup>1</sup>H NMR** (600 MHz, CDCl<sub>3</sub>) δ 7.43 (q, J = 8.1 Hz, 1H), 6.15 (dd, J = 8.0, 2.4 Hz, 1H), 6.08 (dd, J = 7.8, 2.3 Hz, 1H), 4.44 (s, 1H), 3.76 (q, J = 6.2 Hz, 1H), 3.66 – 3.59 (m, 2H), 1.65 – 1.51 (m, 4H), 1.20 (d, J = 6.4 Hz, 3H), 0.89 (s, 9H), 0.04 (s, 6H).

**<sup>13</sup>C NMR** (151 MHz, CDCl<sub>3</sub>) δ 163.30 (d, J = 236.0 Hz), 157.57 (d, J = 16.7 Hz), 141.58 (d, J = 8.5 Hz), 102.57 (d, J = 3.9 Hz), 95.04 (d, J = 36.6 Hz), 62.91, 47.17, 33.28, 29.20, 25.95, 20.86, 18.33, -5.30.

**<sup>19</sup>F NMR** (565 MHz, CDCl<sub>3</sub>) δ -69.75.

**HRMS (m/z):** (ESI) calc'd [M+H]<sup>+</sup>: 313.2106, found: 313.2107.

### Compound 3jb

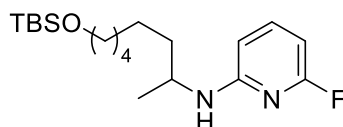

According to **Condition A** at 90 °C for 21 h. alkene **1j** (130 mg, 0.50 mmol) and aminopyridine **2b** (11 mg, 0.10 mmol) was allowed to react, and the product was purified by flash column chromatography (SiO<sub>2</sub>; 95:5 hexanes:EA) to afford compound **3jb** (20 mg, 77%) as a yellow oil. The regioselectivity of the reaction was determined to be 91% by GC. Note: 4-NMe<sub>2</sub>-3,5-DIP-MeOBIPHEP was used as the ligand instead of DIP-Ad-SEGPHOS.

**<sup>1</sup>H NMR** (600 MHz, CDCl<sub>3</sub>) δ 7.43 (q, J = 8.1 Hz, 1H), 6.14 (dd, J = 8.0, 2.4 Hz, 1H), 6.08 (dd, J = 7.8, 2.3 Hz, 1H), 4.36 (s, 1H), 3.71 (q, J = 6.4 Hz, 1H), 3.58 (t, J = 6.6 Hz, 2H), 1.59 – 1.44 (m, 4H), 1.40 – 1.35 (m, 2H), 1.33 – 1.28 (m, 4H), 1.18 (d, J = 6.3 Hz, 3H), 0.89 (s, 9H), 0.04 (s, 6H).

**<sup>13</sup>C NMR** (151 MHz, CDCl<sub>3</sub>) δ 163.43 (d, J = 236.1 Hz), 157.73 (d, J = 16.9 Hz), 141.76 (d, J = 8.6 Hz), 102.56 (d, J = 4.3 Hz), 95.16 (d, J = 36.8 Hz), 63.36, 47.48, 37.17, 32.92, 29.52, 26.12 (two carbons), 25.89, 20.94, 18.51, -5.13.

**<sup>19</sup>F NMR** (565 MHz, CDCl<sub>3</sub>) δ -69.72.

**HRMS (m/z):** (ESI) calc'd [M+H]<sup>+</sup>: 369.2732, found: 369.2733.

### Compound 3kb

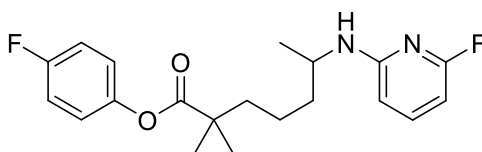

According to **Condition A** at 120 °C for 24 h. alkene **1k** (130 mg, 0.50 mmol) and aminopyridine **2b** (11 mg, 0.10 mmol) was allowed to react, and the product was purified by flash column chromatography (SiO<sub>2</sub>; 90:10 hexanes:EA) to afford compound **3kb** (28 mg, 77%) as a yellow oil. The regioselectivity of the reaction was determined to be >95% by GC. Note: 3.75 mol% [Ir(coe)<sub>2</sub>Cl]<sub>2</sub>, 9 mol% ligand, and 9 mol% NaBARF were used.

**<sup>1</sup>H NMR** (600 MHz, CDCl<sub>3</sub>) δ 7.43 (q, J = 8.1 Hz, 1H), 7.07 – 6.98 (m, 2H), 6.97 – 6.91 (m, 2H), 6.14 (dd, J = 8.0, 2.4 Hz, 1H), 6.09 (dd, J = 7.7, 2.3 Hz, 1H), 4.36 (s, 1H), 3.80 (q, J = 6.4 Hz, 1H), 1.73 – 1.62 (m, 2H), 1.59 – 1.48 (m, 2H), 1.48 – 1.37 (m, 2H), 1.30 (d, J = 2.0 Hz, 6H), 1.19 (d, J = 6.4 Hz, 3H).

**<sup>13</sup>C NMR** (151 MHz, CDCl<sub>3</sub>) δ 176.59, 163.44 (d, J = 236.1 Hz), 160.25 (d, J = 244.0 Hz), 157.66 (d, J = 16.8 Hz), 146.91 (d, J = 2.8 Hz), 141.75 (d, J = 8.5 Hz), 122.98 (d, J = 8.4 Hz), 116.12 (d, J = 23.3 Hz), 102.80 (d, J = 4.2 Hz), 95.31 (d, J = 36.9 Hz), 47.13, 42.73, 40.61, 37.58, 25.25 (two carbons), 21.66, 21.04.

**<sup>19</sup>F NMR** (565 MHz, CDCl<sub>3</sub>) δ -69.62.

**HRMS** (*m/z*): (ESI) calc'd [M+H]<sup>+</sup>: 363.1879, found: 363.1878.

### Compound 3lb

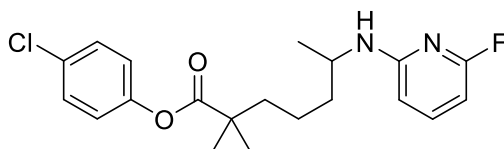

According to **Condition A** at 120 °C for 24 h. alkene **1l** (130 mg, 0.50 mmol) and aminopyridine **2b** (11 mg, 0.10 mmol) was allowed to react, and the product was purified by flash column chromatography (SiO<sub>2</sub>; 90:10 hexanes:EA) to afford compound **3lb** (32 mg, 84%) as a yellow oil. The

[Return to table of contents]

regioselectivity of the reaction was determined to be >95% by GC. Note: 5 mol% [Ir(coe)<sub>2</sub>Cl]<sub>2</sub>, 12 mol% ligand, and 12 mol% NaBARF were used.

<sup>1</sup>H NMR (600 MHz, CDCl<sub>3</sub>) δ 7.43 (q, J = 8.0 Hz, 1H), 7.30 (d, J = 8.3 Hz, 2H), 6.93 (d, J = 8.3 Hz, 2H), 6.19 – 6.13 (m, 1H), 6.11 – 6.05 (m, 1H), 4.35 (s, 1H), 3.80 (q, J = 6.5 Hz, 1H), 1.73 – 1.63 (m, 2H), 1.60 – 1.51 (m, 2H), 1.47– 1.37 (m, 2H), 1.29 (s, 3H), 1.28 (s, 3H), 1.19 (d, J = 6.4 Hz, 3H).

<sup>13</sup>C NMR (151 MHz, CDCl<sub>3</sub>) δ 176.34, 163.45 (d, J = 236.0 Hz), 157.66 (d, J = 16.6 Hz), 149.59, 141.76 (d, J = 8.6 Hz), 131.11, 129.54, 123.01, 102.82 (d, J = 4.4 Hz), 95.33 (d, J = 36.7 Hz), 47.12, 42.79, 40.58, 37.57, 29.84, 25.24, 21.66, 21.06.

<sup>19</sup>F NMR (565 MHz, CDCl<sub>3</sub>) δ -69.61.

HRMS (*m/z*): (ESI) calc'd [M+H]<sup>+</sup>: 379.1583, found: 379.1584.

### Compound 3mb

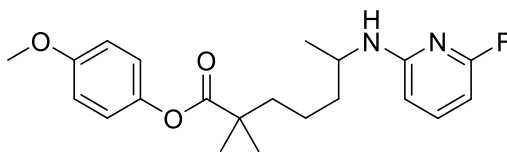

According to **Condition A** at 120 °C for 24 h. alkene **1m** (130 mg, 0.50 mmol) and aminopyridine **2b** (11 mg, 0.10 mmol) was allowed to react, and the product was purified by flash column chromatography (SiO<sub>2</sub>; 85:15 hexanes:EA) to afford compound **3mb** (30 mg, 80%) as a yellow oil. The regioselectivity of the reaction was determined to be >95% by GC. Note: 3.75 mol% [Ir(coe)<sub>2</sub>Cl]<sub>2</sub>, 9 mol% ligand, and 9 mol% NaBARF were used.

<sup>1</sup>H NMR (600 MHz, CDCl<sub>3</sub>) δ 7.43 (q, J = 8.1 Hz, 1H), 6.90 (d, J = 8.6 Hz, 2H), 6.86 (d, J = 8.7 Hz, 2H), 6.14 (dd, J = 8.0, 2.3 Hz, 1H), 6.08 (dd, J = 7.7, 2.3 Hz, 1H), 4.38 (s, 1H), 3.79 (s, 4H), 1.72 – 1.60 (m, 2H), 1.59 – 1.48 (m, 2H), 1.48 – 1.38 (m, 2H), 1.30 (s, 3H), 1.29 (s, 3H), 1.19 (d, J = 6.4 Hz, 3H).

<sup>13</sup>C NMR (151 MHz, CDCl<sub>3</sub>) δ 176.79, 163.31 (d, J = 236.0 Hz), 157.55 (d, J = 16.9 Hz), 157.12, 144.47, 141.64 (d, J = 8.5 Hz), 122.21, 114.43, 102.65 (d, J = 3.9 Hz), 95.15 (d, J = 36.6 Hz), 55.59, 47.07, 42.55, 40.55, 37.46, 25.21, 25.16, 21.55, 20.88.

<sup>19</sup>F NMR (565 MHz, CDCl<sub>3</sub>) δ -69.66.

**HRMS (*m/z*):** (ESI) calc'd [M+H]<sup>+</sup>: 375.2078, found: 375.2079.

### Compound 3nb

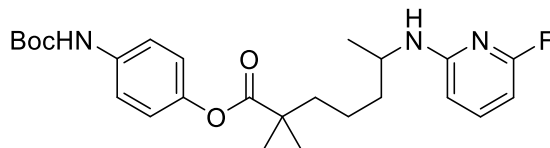

According to **Condition A** at 120 °C for 48 h. alkene **1n** (170 mg, 0.50 mmol) and aminopyridine **2b** (11 mg, 0.10 mmol) was allowed to react, and the product was purified by flash column chromatography (SiO<sub>2</sub>; 85:15 hexanes:EA) to afford compound **3nb** (28 mg, 61%) as a yellow oil. The regioselectivity of the reaction was determined to be >95% by GC. Note: 3.75 mol% [Ir(coe)<sub>2</sub>Cl]<sub>2</sub>, 9 mol% ligand, and 9 mol% NaBARF were used.

**<sup>1</sup>H NMR** (600 MHz, CDCl<sub>3</sub>) δ 7.43 (q, *J* = 8.1 Hz, 1H), 7.33 (d, *J* = 8.4 Hz, 2H), 6.91 (d, *J* = 8.7 Hz, 2H), 6.52 (s, 1H), 6.14 (dd, *J* = 8.1, 2.3 Hz, 1H), 6.08 (dd, *J* = 7.7, 2.2 Hz, 1H), 4.38 (s, 1H), 3.78 (q, *J* = 6.4 Hz, 1H), 1.72 – 1.62 (m, 2H), 1.57 – 1.48 (m, 11H), 1.47 – 1.38 (m, 2H), 1.29 (s, 3H), 1.28 (s, 3H), 1.19 (d, *J* = 6.4 Hz, 3H).

**<sup>13</sup>C NMR** (151 MHz, CDCl<sub>3</sub>) δ 176.59, 163.27 (d, *J* = 236.1 Hz), 157.52 (d, *J* = 16.7 Hz), 152.74, 146.30, 141.67 (d, *J* = 8.6 Hz), 135.88, 121.84, 119.37, 102.68 (d, *J* = 3.9 Hz), 95.14 (d, *J* = 36.7 Hz), 47.07, 42.58, 40.50, 37.44, 29.71, 28.34, 25.18, 25.13, 21.53, 20.86.

**<sup>19</sup>F NMR** (565 MHz, CDCl<sub>3</sub>) δ -69.69.

**HRMS (*m/z*):** (ESI) calc'd [M+H]<sup>+</sup>: 460.2606, found: 460.2609.

### Compound 3ob

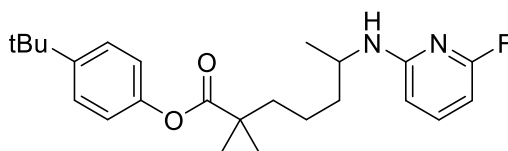

According to **Condition A** at 120 °C for 48 h. alkene **1o** (140 mg, 0.50 mmol) and aminopyridine **2b** (11 mg, 0.10 mmol) was allowed to react, and the product was purified by flash column chromatography (SiO<sub>2</sub>; 92:8 hexanes:EA) to afford compound **3ob** (19 mg, 47%) as a yellow oil. The

regioselectivity of the reaction was determined to be >95% by GC. Note: 5 mol% [Ir(coe)<sub>2</sub>Cl]<sub>2</sub>, 12 mol% ligand, and 12 mol% NaBARF were used.

<sup>1</sup>H NMR (600 MHz, CDCl<sub>3</sub>) δ 7.33 (q, J = 8.1 Hz, 1H), 7.26 (d, J = 8.5 Hz, 2H), 6.82 (d, J = 8.5 Hz, 2H), 6.05 (dd, J = 8.0, 2.4 Hz, 1H), 5.99 (dd, J = 7.8, 2.3 Hz, 1H), 4.28 (s, 1H), 3.73 – 3.64 (m, 1H), 1.63 – 1.54 (m, 2H), 1.50 – 1.39 (m, 2H), 1.39 – 1.29 (m, 2H), 1.21 (s, 9H), 1.21 (s, 3H), 1.20 (s, 3H), 1.10 (d, J = 6.4 Hz, 3H).

<sup>13</sup>C NMR (151 MHz, CDCl<sub>3</sub>) δ 176.56, 163.31 (d, J = 236.1 Hz), 157.53 (d, J = 16.7 Hz), 148.61, 148.42, 141.63 (d, J = 8.5 Hz), 126.26, 120.75, 102.62 (d, J = 4.0 Hz), 95.17 (d, J = 36.9 Hz), 47.10, 42.59, 40.57, 37.47, 34.45, 31.42, 25.21, 25.17, 21.56, 20.88.

<sup>19</sup>F NMR (565 MHz, CDCl<sub>3</sub>) δ -69.66.

HRMS (*m/z*): (ESI) calc'd [M+H]<sup>+</sup>: 401.2599, found: 401.2698.

### Compound 3pb

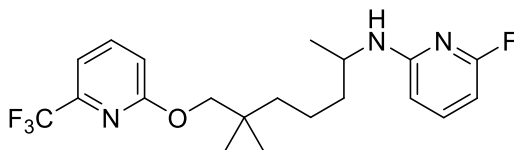

According to **Condition A** at 120 °C for 24 h. alkene **1p** (140 mg, 0.50 mmol) and aminopyridine **2b** (11 mg, 0.10 mmol) was allowed to react, and the product was purified by flash column chromatography (SiO<sub>2</sub>; 97:3 hexanes:EA) to afford compound **3pb** (26 mg, 65%) as a yellow oil. The regioselectivity of the reaction was determined to be 87% by GC. Note: 3.75 mol% [Ir(coe)<sub>2</sub>Cl]<sub>2</sub>, 9 mol% ligand, and 9 mol% NaBARF were used.

<sup>1</sup>H NMR (600 MHz, CDCl<sub>3</sub>) δ 7.66 (t, J = 7.9 Hz, 1H), 7.43 (q, J = 8.1 Hz, 1H), 7.21 (d, J = 7.3 Hz, 1H), 6.87 (d, J = 8.5 Hz, 1H), 6.14 (d, J = 8.0 Hz, 1H), 6.08 (d, J = 7.7 Hz, 1H), 4.36 (s, 1H), 4.03 (s, 2H), 3.74 (q, J = 6.5 Hz, 1H), 1.55 – 1.43 (m, 2H), 1.41 – 1.34 (m, 4H), 1.17 (d, J = 6.3 Hz, 3H), 0.97 (s, 6H).

<sup>13</sup>C NMR (151 MHz, CDCl<sub>3</sub>) δ 164.29, 163.28 (d, J = 235.9 Hz), 157.58 (d, J = 16.9 Hz), 145.42 (q, J = 34.6 Hz), 141.62 (d, J = 8.7 Hz), 139.13, 121.42 (q, J = 273.5 Hz), 114.63, 112.93 (q, J = 3.3 Hz), 102.49 (d, J = 4.0 Hz), 95.05 (d, J = 36.8 Hz), 74.32, 47.24, 39.05, 37.93, 34.08, 24.48, 24.45, 20.83, 20.39.



[Return to table of contents]

$^{19}\text{F}$  NMR (565 MHz,  $\text{CDCl}_3$ )  $\delta$  -68.42, -69.74.

HRMS ( $m/z$ ): (ESI) calc'd  $[\text{M}+\text{H}]^+$ : 400.2007, found: 400.2007.

### Compound 3qb

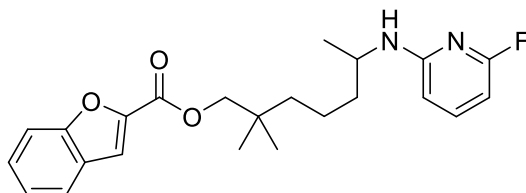

According to **Condition A** at 120 °C for 24 h. alkene **1q** (140 mg, 0.50 mmol) and aminopyridine **2b** (11 mg, 0.10 mmol) was allowed to react, and the product was purified by flash column chromatography ( $\text{SiO}_2$ ; 90:10 hexanes:EA) to afford compound **3qb** (28 mg, 70%) as a yellow oil. The regioselectivity of the reaction was determined to be >95% by GC. Note: 3.75 mol%  $[\text{Ir}(\text{coe})_2\text{Cl}]_2$ , 9 mol% ligand, and 9 mol% NaBARF were used.

$^1\text{H}$  NMR (600 MHz,  $\text{CDCl}_3$ )  $\delta$  7.67 (d,  $J = 7.8$  Hz, 1H), 7.58 (d,  $J = 8.5$  Hz, 1H), 7.49 (s, 1H), 7.44 (t,  $J = 8.4$  Hz, 1H), 7.40 (q,  $J = 8.1$  Hz, 1H), 7.33 – 7.27 (m, 1H), 6.13 (dd,  $J = 8.1, 2.3$  Hz, 1H), 6.06 (dd,  $J = 7.7, 2.3$  Hz, 1H), 4.37 (s, 1H), 4.09 (s, 2H), 3.77 (q,  $J = 6.4$  Hz, 1H), 1.56 – 1.44 (m, 2H), 1.45 – 1.31 (m, 4H), 1.19 (d,  $J = 6.4$  Hz, 3H), 0.99 (s, 6H).

$^{13}\text{C}$  NMR (151 MHz,  $\text{CDCl}_3$ )  $\delta$  163.29 (d,  $J = 236.0$  Hz), 159.71, 157.57 (d,  $J = 16.9$  Hz), 155.80, 145.60, 141.61 (d,  $J = 8.7$  Hz), 127.57, 126.98, 123.78, 122.81, 113.60, 112.40, 102.60 (d,  $J = 4.2$  Hz), 95.09 (d,  $J = 36.6$  Hz), 73.12, 47.19, 39.08, 37.86, 34.17, 24.29 (two carbons), 20.88, 20.38.

$^{19}\text{F}$  NMR (565 MHz,  $\text{CDCl}_3$ )  $\delta$  -69.69.

HRMS ( $m/z$ ): (ESI) calc'd  $[\text{M}+\text{H}]^+$ : 399.2078, found: 399.2076.

### Compound 3rb

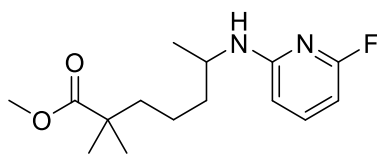

According to **Condition A** at 120 °C for 58 h. alkene **1r** (85 mg, 0.50 mmol) and aminopyridine **2b** (11 mg, 0.10 mmol) was allowed to react, and the product was purified by flash column chromatography (SiO<sub>2</sub>; 90:10 hexanes:EA) to afford compound **3rb** (22 mg, 76%) as a yellow oil. The regioselectivity of the reaction was determined to be >95% by GC.

<sup>1</sup>H NMR (600 MHz, CDCl<sub>3</sub>) δ 7.43 (q, J = 8.0 Hz, 1H), 6.18 – 6.10 (m, 1H), 6.10 – 6.02 (m, 1H), 4.36 (s, 1H), 3.73 (q, J = 6.4 Hz, 1H), 3.62 (s, 3H), 1.55 – 1.40 (m, 4H), 1.35 – 1.21 (m, 2H), 1.16 (d, J = 6.5 Hz, 3H), 1.14 (d, J = 3.1 Hz, 6H).

<sup>13</sup>C NMR (151 MHz, CDCl<sub>3</sub>) δ 178.52, 163.42 (d, J = 235.9 Hz), 157.67 (d, J = 16.9 Hz), 141.74 (d, J = 8.6 Hz), 102.70 (d, J = 3.9 Hz), 95.20 (d, J = 36.8 Hz), 51.78, 47.21, 42.39, 40.68, 37.52, 25.31, 25.26, 21.56, 20.90.

<sup>19</sup>F NMR (565 MHz, CDCl<sub>3</sub>) δ -69.73.

HRMS (*m/z*): (ESI) calc'd [M+H]<sup>+</sup>: 283.1816, found: 283.1815.

### Compound 3sb

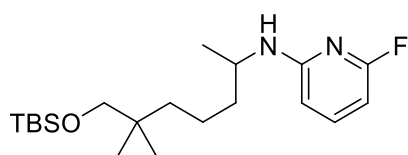

According to **Condition A** at 120 °C for 24 h. alkene **1s** (130 mg, 0.50 mmol) and aminopyridine **2b** (11 mg, 0.10 mmol) was allowed to react, and the product was purified by flash column chromatography (SiO<sub>2</sub>; 97:3 hexanes:EA) to afford compound **3sb** (22 mg, 58%) as a yellow oil. The regioselectivity of the reaction was determined to be 88% by GC. Note: 3.75 mol% [Ir(coe)<sub>2</sub>Cl]<sub>2</sub>, 9 mol% ligand, and 9 mol% NaBARF were used.

[Return to table of contents]

**<sup>1</sup>H NMR** (600 MHz, CDCl<sub>3</sub>) δ 7.44 (q, J = 8.1 Hz, 1H), 6.14 (dd, J = 8.1, 2.4 Hz, 1H), 6.08 (dd, J = 7.8, 2.3 Hz, 1H), 4.38 (s, 1H), 3.72 (q, J = 6.4 Hz, 1H), 3.21 (s, 2H), 1.54 – 1.38 (m, 2H), 1.36 – 1.27 (m, 2H), 1.21 (d, J = 8.6 Hz, 2H), 1.18 (d, J = 6.5 Hz, 3H), 0.88 (s, 9H), 0.80 (s, 6H), 0.01 (s, 6H).

**<sup>13</sup>C NMR** (151 MHz, CDCl<sub>3</sub>) δ 163.30 (d, J = 236.1 Hz), 157.59 (d, J = 16.8 Hz), 141.62 (d, J = 8.7 Hz), 102.39 (d, J = 4.1 Hz), 95.02 (d, J = 36.6 Hz), 71.44, 47.40, 38.70, 38.08, 35.21, 25.89, 24.12, 24.10, 20.78, 20.41, 18.28, -5.53.

**<sup>19</sup>F NMR** (565 MHz, CDCl<sub>3</sub>) δ -69.75.

**HRMS** (*m/z*): (ESI) calc'd [M+H]<sup>+</sup>: 369.2732, found: 369.2734.

### Compound 3tb

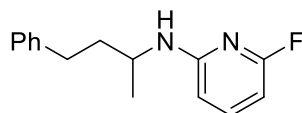

According to **Condition A** at 90 °C for 24 h. (Z)-but-1-en-1-ylbenzene (44 mg, 0.34 mmol), (E)-but-2-en-1-ylbenzene (44 mg, 0.34 mmol), (E)-but-1-en-1-ylbenzene (44 mg, 0.34 mmol) and aminopyridine **2b** (11 mg, 0.10 mmol) was allowed to react, and the product was purified by flash column chromatography (SiO<sub>2</sub>; 97.5:2.5 hexanes:EA) to afford compound **3tb** (19 mg, 79%) as a yellow oil. The regioselectivity of the reaction was determined to be >95% by GC. Note: 3.75 mol% [Ir(coe)<sub>2</sub>Cl]<sub>2</sub>, 9 mol% ligand, and 9 mol% NaBARf were used.

**<sup>1</sup>H NMR** (600 MHz, CDCl<sub>3</sub>) δ 7.43 (q, J = 8.1 Hz, 1H), 7.28 (t, J = 7.6 Hz, 2H), 7.21 – 7.15 (m, 3H), 6.17 – 6.09 (m, 1H), 6.09 – 6.05 (m, 1H), 4.42 (d, J = 8.9 Hz, 1H), 3.81 – 3.75 (m, 1H), 2.75 – 2.67 (m, 2H), 1.89 – 1.78 (m, 2H), 1.24 (d, J = 6.4 Hz, 3H).

**<sup>13</sup>C NMR** (151 MHz, CDCl<sub>3</sub>) δ 163.32 (d, J = 236.1 Hz), 157.53 (d, J = 16.7 Hz), 141.73 (d, J = 4.1 Hz), 141.66, 128.44, 128.39, 125.94, 102.49 (d, J = 4.0 Hz), 95.29 (d, J = 36.9 Hz), 46.91, 38.78, 32.39, 20.90.

**<sup>19</sup>F NMR** (565 MHz, CDCl<sub>3</sub>) δ -69.67.

**HRMS** (*m/z*): (ESI) calc'd [2M+ACN+H]<sup>+</sup>: 530.3090, found: 530.3077.

## Compound 3ub

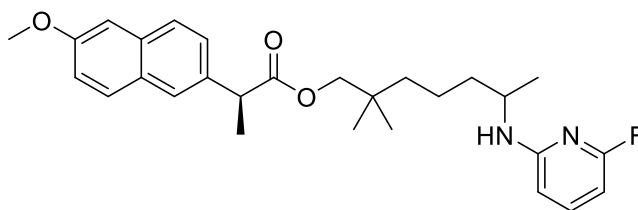

According to **Condition A** at 120 °C for 48 h. alkene **1u** (180 mg, 0.50 mmol) and aminopyridine **2b** (11 mg, 0.10 mmol) was allowed to react, and the product was purified by flash column chromatography (SiO<sub>2</sub>; 95:5 hexanes:EA) to afford compound **3ub** (38 mg, 81%) as a yellow oil. The regioselectivity of the reaction was determined to be >95% by GC. The d.r. of the product was determined to be 1:1 by GC. Note: 3.75 mol% [Ir(coe)<sub>2</sub>Cl]<sub>2</sub>, 9 mol% ligand, and 9 mol% NaBARF were used. Note: The two diastereomers have identical NMR chemical shifts.

**<sup>1</sup>H NMR** (600 MHz, CDCl<sub>3</sub>) δ 7.72 – 7.66 (m, 3H), 7.42 – 7.38 (m, 2H), 7.15 – 7.11 (m, 1H), 7.11 (s, 1H), 6.09 – 6.04 (m, 2H), 4.22 (s, 1H), 3.92 – 3.85 (m, 4H), 3.82 (dd, J = 10.8, 2.8 Hz, 1H), 3.71 (dd, J = 10.8, 3.0 Hz, 1H), 3.62 – 3.52 (m, 1H), 1.59 (d, J = 7.2 Hz, 3H), 1.29 – 1.08 (m, 5H), 1.06 – 1.02 (m, 4H), 0.80 (s, 3H), 0.77 (d, J = 3.2 Hz, 3H).

**<sup>13</sup>C NMR** (151 MHz, CDCl<sub>3</sub>) δ 174.59, 163.31 (d, J = 235.7 Hz), 157.64, 157.55 (d, J = 16.7, 2.5 Hz), 141.57 (d, J = 8.7, 2.6 Hz), 135.83, 133.69, 129.27, 128.93, 127.03, 126.43, 126.00, 118.98, 105.61, 102.54 (d, J = 8.3, 3.9 Hz), 95.00 (d, J = 36.9, 2.1 Hz), 72.26, 55.30, 47.10, 45.63, 38.77, 37.68, 33.89, 24.44, 24.17, 20.70, 20.24, 18.05.

**<sup>19</sup>F NMR** (565 MHz, CDCl<sub>3</sub>) δ -69.72.

**HRMS** (*m/z*): (ESI) calc'd [M+H]<sup>+</sup>: 467.2704, found: 467.2702.

### Compound 3vb

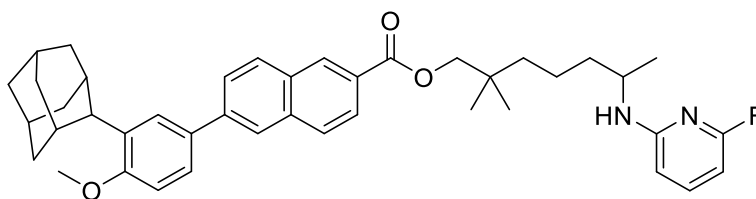

According to **Condition A** at 120 °C for 24 h. alkene **1v** (270 mg, 0.50 mmol) and aminopyridine **2b** (11 mg, 0.10 mmol) was allowed to react, and the product was purified by flash column chromatography (SiO<sub>2</sub>; 80:20 hexanes:EA) to afford compound **3vb** (58 mg, 89%) as a white solid. The regioselectivity of the reaction was determined to be >95% by LCMS. Note: 3.75 mol% [Ir(coe)<sub>2</sub>Cl]<sub>2</sub>, 9 mol% ligand, and 9 mol% NaBARf were used.

<sup>1</sup>H NMR (600 MHz, CDCl<sub>3</sub>) δ 8.61 (s, 1H), 8.08 (d, J = 8.4 Hz, 1H), 8.03 (s, 1H), 8.00 (d, J = 8.5 Hz, 1H), 7.92 (d, J = 8.6 Hz, 1H), 7.81 (dd, J = 8.6, 1.8 Hz, 1H), 7.63 (d, J = 2.4 Hz, 1H), 7.55 (dd, J = 8.3, 2.3 Hz, 1H), 7.39 (q, J = 8.1 Hz, 1H), 7.00 (d, J = 8.4 Hz, 1H), 6.13 (dd, J = 8.1, 2.3 Hz, 1H), 6.07 (dd, J = 7.7, 2.2 Hz, 1H), 4.44 (s, 1H), 4.12 (s, 2H), 3.91 (s, 3H), 3.79 (q, J = 6.4 Hz, 1H), 2.21 (s, 6H), 2.12 (s, 3H), 1.89 – 1.77 (m, 6H), 1.61 – 1.36 (m, 6H), 1.20 (d, J = 6.4 Hz, 3H), 1.06 (s, 6H).

<sup>13</sup>C NMR (151 MHz, CDCl<sub>3</sub>) δ 166.90, 163.39 (d, J = 236.0 Hz), 159.04, 157.68 (d, J = 16.7 Hz), 141.68 (d, J = 8.7 Hz), 141.45, 139.11, 136.05, 132.63, 131.36, 130.80, 129.81, 128.35, 127.33, 126.56, 126.04, 125.83, 125.62, 124.80, 112.23, 102.66 (d, J = 4.4 Hz), 95.14 (d, J = 36.9 Hz), 73.00, 67.18, 55.25, 47.33, 40.72, 39.41, 38.00, 37.32, 37.24, 34.29, 29.80, 29.22 (two carbons), 24.61, 24.57, 20.94, 20.56.

<sup>19</sup>F NMR (565 MHz, CDCl<sub>3</sub>) δ -69.69.

HRMS (*m/z*): (ESI) calc'd [M+H]<sup>+</sup>: 649.3800, found: 649.3810.

### Compound 3wb

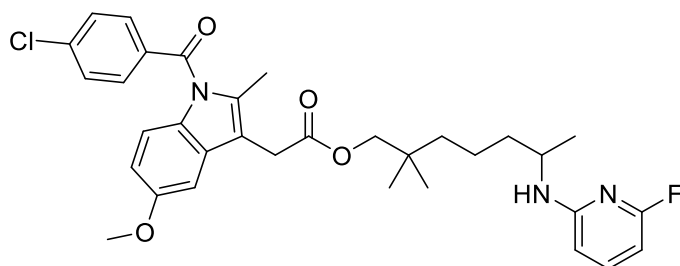

According to **Condition A** at 120 °C for 24 h. alkene **1w** (240 mg, 0.50 mmol) and aminopyridine **2b** (11 mg, 0.10 mmol) was allowed to react, and the product was purified by flash column chromatography (SiO<sub>2</sub>; 80:20 hexanes:EA) to afford compound **3wb** (52 mg, 87%) as a yellow oil. The regioselectivity of the reaction was determined to be >95% by LCMS. Note: 5 mol% [Ir(coe)<sub>2</sub>Cl]<sub>2</sub>, 12 mol% ligand, and 12 mol% NaBARF were used.

**<sup>1</sup>H NMR** (600 MHz, CDCl<sub>3</sub>) δ 7.63 (d, J = 8.1 Hz, 2H), 7.45 (d, J = 8.1 Hz, 2H), 7.41 (q, J = 8.2 Hz, 1H), 6.98 (d, J = 2.5 Hz, 1H), 6.88 (d, J = 8.9 Hz, 1H), 6.66 (dd, J = 8.9, 2.6 Hz, 1H), 6.11 (dd, J = 7.9, 2.3 Hz, 1H), 6.06 (dd, J = 7.8, 2.3 Hz, 1H), 4.35 (s, 1H), 3.82 (s, 3H), 3.79 (s, 2H), 3.66 (s, 3H), 2.39 (s, 3H), 1.28 – 1.24 (m, 4H), 1.14 – 1.07 (m, 5H), 0.81 (s, 6H).

**<sup>13</sup>C NMR** (151 MHz, CDCl<sub>3</sub>) δ 170.83, 168.30, 163.32 (d, J = 235.7 Hz), 157.62 (d, J = 16.7 Hz), 156.05, 141.55 (d, J = 8.8 Hz), 139.31, 135.75, 133.89, 131.17, 130.83, 130.65, 129.13, 114.95, 112.85, 111.69, 102.68 (d, J = 3.9 Hz), 101.44, 94.98 (d, J = 36.8 Hz), 72.56, 55.71, 47.11, 38.82, 37.78, 33.80, 30.48, 24.29, 24.20, 20.87, 20.32, 13.33.

**<sup>19</sup>F NMR** (565 MHz, CDCl<sub>3</sub>) δ -69.70.

**HRMS** (*m/z*): (ESI) calc'd [M+H]<sup>+</sup>: 594.2529, found: 594.2534.

## Compound 3xb

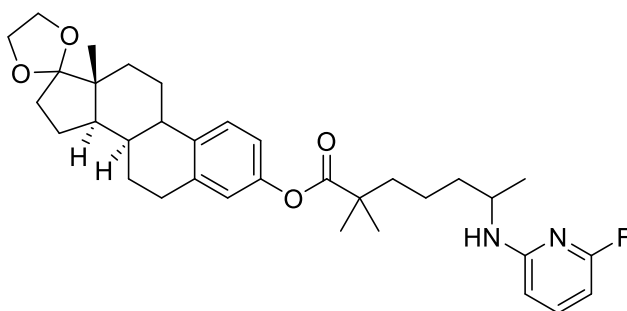

According to **Condition A** at 120 °C for 19 h. alkene **1x** (230 mg, 0.50 mmol) and aminopyridine **2b** (11 mg, 0.10 mmol) was allowed to react, and the product was purified by flash column chromatography (SiO<sub>2</sub>; 80:20 hexanes:EA) to afford compound **3xb** (33 mg, 58%) as a yellow oil. The regioselectivity of the reaction was determined to be >95% by GC. The d.r. of the product was determined to be 1:1 by GC. Note: The two diastereomers have identical NMR chemical shifts.

**<sup>1</sup>H NMR** (600 MHz, CDCl<sub>3</sub>) δ 7.42 (q, J = 8.1 Hz, 1H), 7.25 (d, J = 8.9 Hz, 1H), 6.75 (d, J = 8.4 Hz, 1H), 6.71 (s, 1H), 6.14 (d, J = 8.0 Hz, 1H), 6.08 (d, J = 7.7 Hz, 1H), 4.39 (s, 1H), 4.04 – 3.83 (m, 4H), 3.79 (q, J = 6.6 Hz, 1H), 2.84 (t, J = 8.1 Hz, 2H), 2.40 – 2.19 (m, 2H), 2.08– 1.98 (m, 1H), 1.96 – 1.81 (m, 2H), 1.81 – 1.72 (m, 2H), 1.72 – 1.60 (m, 3H), 1.60 – 1.32 (m, 9H), 1.29 (d, J = 3.8 Hz, 6H), 1.19 (d, J = 6.4 Hz, 3H), 0.88 (s, 3H).

**<sup>13</sup>C NMR** (151 MHz, CDCl<sub>3</sub>) δ 176.65, 163.30 (d, J = 236.1 Hz), 157.54 (d, J = 16.9 Hz), 148.68, 141.62 (d, J = 8.6 Hz), 138.21, 137.83, 126.32, 121.34, 119.39, 118.41, 102.65 (d, J = 3.9 Hz), 95.13 (d, J = 36.7 Hz), 65.27, 64.59, 49.40, 47.10, 46.12, 43.83, 42.56, 40.53, 38.73, 37.47, 34.24, 30.71, 29.53, 26.81, 26.01, 25.24, 25.16, 22.38, 21.55, 20.85, 14.33.

**<sup>19</sup>F NMR** (565 MHz, CDCl<sub>3</sub>) δ -69.65.

**HRMS (m/z):** (ESI) calc'd [M+H]<sup>+</sup>: 565.3436, found: 565.3431.

### Compound 3ac

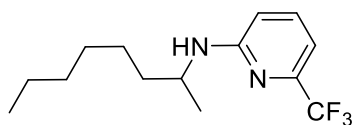

According to **Condition A** at 100 °C for 36 h. *cis*-4-octene (78  $\mu$ L, 0.50 mmol) and aminopyridine **2c** (16 mg, 0.10 mmol) was allowed to react, and the product was purified by flash column chromatography (SiO<sub>2</sub>; 98:2 hexanes:EA) to afford compound **3ac** (16 mg, 56%) as a yellow oil. The regioselectivity of the reaction was determined to be 94% by GC. Note: 5 mol% [Ir(coe)<sub>2</sub>Cl]<sub>2</sub>, 12 mol% ligand, and 12 mol% NaBARF were used.

**<sup>1</sup>H NMR** (600 MHz, CDCl<sub>3</sub>)  $\delta$  7.50 (t, *J* = 7.9 Hz, 1H), 6.87 (d, *J* = 7.4 Hz, 1H), 6.48 (d, *J* = 8.5 Hz, 1H), 4.61 (d, *J* = 8.1 Hz, 1H), 3.74 (hept, *J* = 6.6 Hz, 1H), 1.60 – 1.44 (m, 2H), 1.41 – 1.33 (m, 2H), 1.33 – 1.24 (m, 6H), 1.20 (d, *J* = 6.4 Hz, 3H), 0.88 (t, *J* = 6.8 Hz, 3H).

**<sup>13</sup>C NMR** (151 MHz, CDCl<sub>3</sub>)  $\delta$  158.17, 146.74 (q, *J* = 33.7 Hz), 138.10, 121.66 (q, *J* = 274.1 Hz), 109.28, 108.38 (q, *J* = 3.3 Hz), 47.37, 37.08, 31.77, 29.24, 25.98, 22.59, 20.69, 14.04.

**<sup>19</sup>F NMR** (565 MHz, CDCl<sub>3</sub>)  $\delta$  -68.84.

**HRMS (*m/z*):** (ESI) calc'd [M+K]<sup>+</sup>: 313.1289, found: 313.1276.

### Compound 3ad

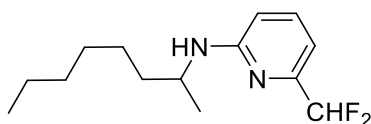

According to **Condition A** at 100 °C for 18 h. *cis*-4-octene (78  $\mu$ L, 0.50 mmol) and aminopyridine **2d** (14 mg, 0.10 mmol) was allowed to react, and the product was purified by flash column chromatography (SiO<sub>2</sub>; 97.5:2.5 hexanes:EA) to afford compound **3ad** (15 mg, 67%) as a yellow oil. The regioselectivity of the reaction was determined to be 91% by GC.

**<sup>1</sup>H NMR** (600 MHz, CDCl<sub>3</sub>)  $\delta$  7.42 (t, *J* = 7.8 Hz, 1H), 6.75 (d, *J* = 7.3 Hz, 1H), 6.34 (d, *J* = 8.4 Hz, 1H), 6.32 (t, *J* = 55.9 Hz, 1H), 4.42 (d, *J* = 8.4 Hz, 1H), 3.66 (p, *J* = 6.7 Hz, 1H), 1.53 – 1.37 (m, 2H), 1.34 – 1.26 (m, 2H), 1.25 – 1.16 (m, 6H), 1.12 (d, *J* = 6.4 Hz, 3H), 0.81 (t, *J* = 6.8 Hz, 3H).



[Return to table of contents]

$^{13}\text{C}$  NMR (151 MHz,  $\text{CDCl}_3$ )  $\delta$  158.08, 151.30 (t,  $J = 24.9$  Hz), 138.21, 114.03 (t,  $J = 240.0$  Hz), 108.17 (t,  $J = 3.7$  Hz), 47.29, 37.14, 31.78, 29.7 (t,  $J = 319.1$  Hz) 29.27, 26.01, 22.60, 20.77, 14.06.

$^{19}\text{F}$  NMR (565 MHz,  $\text{CDCl}_3$ )  $\delta$  -116.65 (app-d,  $J = 55.3$  Hz).

HRMS ( $m/z$ ): (ESI) calc'd  $[\text{M}+\text{Na}]^+$ : 279.1643, found: 279.1663.

### Compound 3ae

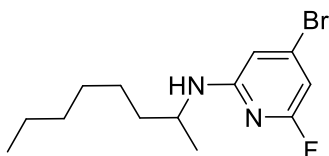

According to **Condition A** at 100 °C for 12 h. *cis*-4-octene (78  $\mu\text{L}$ , 0.50 mmol) and aminopyridine **2e** (19 mg, 0.10 mmol) was allowed to react, and the product was purified by flash column chromatography ( $\text{SiO}_2$ ; 97.5:2.5 hexanes:EA) to afford compound **3ae** (23 mg, 75%) as a yellow oil. The regioselectivity of the reaction was determined to be 92% by GC.

$^1\text{H}$  NMR (600 MHz,  $\text{CDCl}_3$ )  $\delta$  6.31 (s, 1H), 6.27 (s, 1H), 4.48 (d,  $J = 8.4$  Hz, 1H), 3.68 (hept,  $J = 6.8$  Hz, 1H), 1.54 – 1.43 (m, 2H), 1.40 – 1.22 (m, 8H), 1.18 (d,  $J = 6.4$  Hz, 3H), 0.88 (t,  $J = 6.8$  Hz, 3H).

$^{13}\text{C}$  NMR (151 MHz,  $\text{CDCl}_3$ )  $\delta$  163.29 (d,  $J = 238.4$  Hz), 157.77 (d,  $J = 19.1$  Hz), 135.79 (d,  $J = 10.9$  Hz), 105.50, 99.16 (d,  $J = 40.9$  Hz), 47.66, 37.10, 31.89, 29.33, 26.03, 22.72, 20.85, 14.19.

$^{19}\text{F}$  NMR (565 MHz,  $\text{CDCl}_3$ )  $\delta$  -68.66.

HRMS ( $m/z$ ): (ESI) calc'd  $[2\text{M}+\text{H}]^+$ : 605.1661, found: 605.1671.

### Compound 3af

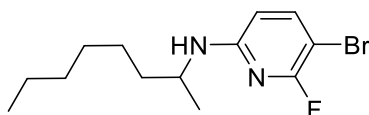

According to **Condition A** at 100 °C for 12 h. *cis*-4-octene (78  $\mu\text{L}$ , 0.50 mmol) and aminopyridine **2f** (19 mg, 0.10 mmol) was allowed to react, and the product was purified by flash column

[Return to table of contents]

chromatography (SiO<sub>2</sub>; 97.5:2.5 hexanes:EA) to afford compound **3af** (17 mg, 61%) as a yellow oil. The regioselectivity of the reaction was determined to be 91% by GC.

**<sup>1</sup>H NMR** (600 MHz, CDCl<sub>3</sub>) δ 7.53 (t, J = 8.7 Hz, 1H), 6.09 (d, J = 8.5 Hz, 1H), 4.40 (d, J = 8.3 Hz, 1H), 3.77 – 3.63 (m, 1H), 1.55 – 1.41 (m, 2H), 1.39 – 1.21 (m, 8H), 1.17 (d, J = 6.4 Hz, 3H), 0.87 (t, J = 6.8 Hz, 3H).

**<sup>13</sup>C NMR** (151 MHz, CDCl<sub>3</sub>) δ 158.73 (d, J = 233.2 Hz), 156.36 (d, J = 15.9 Hz), 144.10 (d, J = 2.8 Hz), 104.59 (d, J = 4.4 Hz), 86.93 (d, J = 37.9 Hz), 47.60, 36.99, 31.76, 29.22, 25.92, 22.58, 20.71, 14.05.

**<sup>19</sup>F NMR** (565 MHz, CDCl<sub>3</sub>) δ -67.25.

**HRMS** (*m/z*): (ESI) calc'd [2M+H]<sup>+</sup>: 605.1661, found: 605.1671.

### Compound 3ag

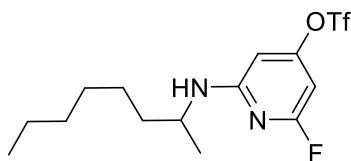

According to **Condition A** at 100 °C for 18 h. *cis*-4-octene (78 μL, 0.50 mmol) and aminopyridine **2g** (26 mg, 0.10 mmol) was allowed to react, and the product was purified by flash column chromatography (SiO<sub>2</sub>; 97.5:2.5 hexanes:EA) to afford compound **3ag** (20 mg, 54%) as a yellow oil. The regioselectivity of the reaction was determined to be 91% by GC. Note: 3.75 mol% [Ir(coe)<sub>2</sub>Cl]<sub>2</sub>, 9 mol% ligand, and 9 mol% NaBARF were used.

**<sup>1</sup>H NMR** (600 MHz, CDCl<sub>3</sub>) δ 6.04 (s, 1H), 6.02 (s, 1H), 4.71 (d, J = 8.3 Hz, 1H), 3.75 – 3.66 (m, 1H), 1.56 – 1.45 (m, 2H), 1.40 – 1.22 (m, 8H), 1.20 (d, J = 6.4 Hz, 3H), 0.88 (t, J = 6.8 Hz, 3H).

**<sup>13</sup>C NMR** (151 MHz, CDCl<sub>3</sub>) δ 163.85 (d, J = 237.5 Hz), 159.54 (d, J = 13.2 Hz), 158.16 (d, J = 20.5 Hz), 118.58 (q, J = 320.8 Hz), 94.65, 88.87 (d, J = 43.0 Hz), 47.80, 36.83, 31.71, 29.15, 25.88, 22.55, 20.54, 14.01.

**<sup>19</sup>F NMR** (565 MHz, CDCl<sub>3</sub>) δ -64.23, -72.85.

**HRMS** (*m/z*): (ESI) calc'd [M+Na]<sup>+</sup>: 395.1023, found: 395.1020.

### Compound 3ah

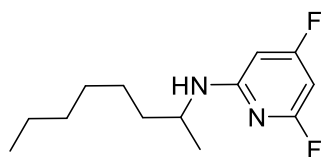

According to **Condition A** at 100 °C for 12 h. *cis*-4-octene (78  $\mu$ L, 0.50 mmol) and aminopyridine **2h** (13 mg, 0.10 mmol) was allowed to react, and the product was purified by flash column chromatography (SiO<sub>2</sub>; 97.5:2.5 hexanes:EA) to afford compound **3ah** (17 mg, 71%) as a yellow oil. The regioselectivity of the reaction was determined to be 93% by GC.

<sup>1</sup>H NMR (600 MHz, CDCl<sub>3</sub>)  $\delta$  5.86 (s, 1H), 5.84 (t, J = 2.8 Hz, 1H), 4.56 (d, J = 8.3 Hz, 1H), 3.65 – 3.58 (m, 1H), 1.54 – 1.42 (m, 2H), 1.38 – 1.23 (m, 8H), 1.18 (d, J = 6.4 Hz, 3H), 0.88 (t, J = 6.8 Hz, 3H).

<sup>13</sup>C NMR (151 MHz, CDCl<sub>3</sub>)  $\delta$  172.63 (dd, J = 255.8, 14.1 Hz), 164.29 (dd, J = 234.6, 17.4 Hz), 158.53 (dd, J = 21.2, 14.2 Hz), 89.30 (dd, J = 22.9, 5.3 Hz), 85.00 (dd, J = 42.2, 24.6 Hz), 47.82, 37.08, 31.90, 29.34, 26.05, 22.72, 20.80, 14.18.

<sup>19</sup>F NMR (565 MHz, CDCl<sub>3</sub>)  $\delta$  -66.22 (d, J = 22.8 Hz), -98.96.

HRMS (*m/z*): (ESI) calc'd [M+H]<sup>+</sup>: 243.1668, found: 243.1663.

### Compound 3ai

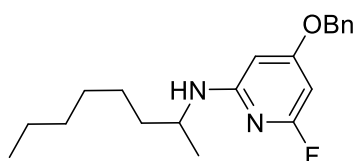

According to **Condition A** at 100 °C for 12 h. *cis*-4-octene (78  $\mu$ L, 0.50 mmol) and aminopyridine **2i** (22 mg, 0.10 mmol) was allowed to react, and the product was purified by flash column chromatography (SiO<sub>2</sub>; 97:3 hexanes:EA) to afford compound **3ai** (29 mg, 88%) as a yellow oil. The regioselectivity of the reaction was determined to be 90% by GC.

[Return to table of contents]

**<sup>1</sup>H NMR** (600 MHz, CDCl<sub>3</sub>) δ 7.40 (d, J = 4.4 Hz, 4H), 7.37 – 7.32 (m, 1H), 5.78 (d, J = 1.7 Hz, 1H), 5.72 (s, 1H), 5.05 (s, 2H), 4.37 (d, J = 8.3 Hz, 1H), 3.59 (p, J = 6.7 Hz, 1H), 1.52 – 1.42 (m, 2H), 1.39 – 1.20 (m, 8H), 1.16 (d, J = 6.4 Hz, 3H), 0.88 (t, J = 6.8 Hz, 3H).

**<sup>13</sup>C NMR** (151 MHz, CDCl<sub>3</sub>) δ 169.85 (d, J = 13.0 Hz), 164.70 (d, J = 231.8 Hz), 158.21 (d, J = 21.1 Hz), 135.96, 128.85, 128.47, 127.64, 88.14 (d, J = 4.2 Hz), 83.72 (d, J = 41.8 Hz), 70.31, 47.67, 37.17, 31.91, 29.38, 26.07, 22.72, 20.86, 14.19.

**<sup>19</sup>F NMR** (565 MHz, CDCl<sub>3</sub>) δ -69.20.

**HRMS** (*m/z*): (ESI) calc'd [2M+Na]<sup>+</sup>: 683.4106, found: 683.4096.

### Compound 3aj

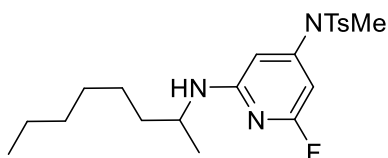

According to **Condition A** at 100 °C for 6 h. *cis*-4-octene (78 μL, 0.50 mmol) and aminopyridine **2j** (30 mg, 0.10 mmol) was allowed to react, and the product was purified by flash column chromatography (SiO<sub>2</sub>; 91:9 hexanes:EA) to afford compound **3aj** (31 mg, 77%) as a yellow oil. The regioselectivity of the reaction was determined to be 92% by GC.

**<sup>1</sup>H NMR** (600 MHz, CDCl<sub>3</sub>) δ 7.27 (d, J = 7.8 Hz, 2H), 6.99 (d, J = 7.4 Hz, 2H), 5.91 (s, 1H), 5.55 (s, 1H), 4.18 (d, J = 8.3 Hz, 1H), 3.43 – 3.31 (m, 1H), 2.90 (s, 3H), 2.14 (s, 3H), 1.26 – 1.14 (m, 2H), 1.14 – 0.96 (m, 8H), 0.89 (d, J = 6.4 Hz, 3H), 0.61 (t, J = 6.8 Hz, 3H).

**<sup>13</sup>C NMR** <sup>13</sup>C NMR (151 MHz, CDCl<sub>3</sub>) δ 163.73 (d, J = 233.5 Hz), 157.54 (d, J = 19.8 Hz), 153.70 (d, J = 11.6 Hz), 144.23, 133.83, 129.66, 127.45, 97.60, 89.77 (d, J = 41.3 Hz), 47.45, 36.99, 36.70, 31.78, 29.25, 25.90, 22.59, 21.56, 20.69, 14.06.

**<sup>19</sup>F NMR** (565 MHz, CDCl<sub>3</sub>) δ -68.72.

**HRMS** (*m/z*): (ESI) calc'd [2M+ACN+H]<sup>+</sup>: 878.4244, found: 878.4236.

### Compound 3ak

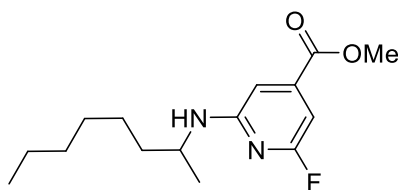

According to **Condition A** at 100 °C for 12 h. *cis*-4-octene (78  $\mu$ L, 0.50 mmol) and aminopyridine **2k** (17 mg, 0.10 mmol) was allowed to react, and the product was purified by flash column chromatography (SiO<sub>2</sub>; 97:3 hexanes:EA) to afford compound **3ak** (18 mg, 65%) as a yellow oil. The regioselectivity of the reaction was determined to be 90% by GC.

**<sup>1</sup>H NMR** (600 MHz, CDCl<sub>3</sub>)  $\delta$  6.76 (s, 1H), 6.59 (s, 1H), 4.57 (d, *J* = 8.4 Hz, 1H), 3.91 (s, 3H), 3.79 (t, *J* = 7.0 Hz, 1H), 1.56 – 1.43 (m, 2H), 1.41 – 1.23 (m, 8H), 1.19 (d, *J* = 6.4 Hz, 3H), 0.87 (t, *J* = 6.7 Hz, 3H).

**<sup>13</sup>C NMR** (151 MHz, CDCl<sub>3</sub>)  $\delta$  165.42 (d, *J* = 4.3 Hz), 163.90 (d, *J* = 236.4 Hz), 158.06 (d, *J* = 17.4 Hz), 143.39 (d, *J* = 9.0 Hz), 103.34, 94.88 (d, *J* = 39.7 Hz), 52.76, 47.65, 37.15, 31.89, 29.35, 26.04, 22.72, 20.91, 14.18.

**<sup>19</sup>F NMR** (565 MHz, CDCl<sub>3</sub>)  $\delta$  -68.83.

**HRMS** (*m/z*): (ESI) calc'd [M+ACN+Na]<sup>+</sup>: 346.1902, found: 349.1905.

### Compound 3al

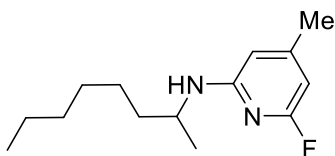

According to **Condition A** at 100 °C for 24 h. *cis*-4-octene (78  $\mu$ L, 0.50 mmol) and aminopyridine **2l** (12 mg, 0.10 mmol) was allowed to react, and the product was purified by flash column chromatography (SiO<sub>2</sub>; 98:2 hexanes:EA) to afford compound **3al** (17 mg, 69%) as a yellow oil. The regioselectivity of the reaction was determined to be 92% by GC.

[Return to table of contents]

**<sup>1</sup>H NMR** (600 MHz, CDCl<sub>3</sub>) δ 5.96 (s, 1H), 5.93 (s, 1H), 4.29 (d, J = 8.5 Hz, 1H), 3.68 (app-dq, J = 8.2, 6.3 Hz, 1H), 2.23 (s, 3H), 1.53 – 1.42 (m, 2H), 1.39 – 1.32 (m, 2H), 1.30 – 1.23 (s, 6H), 1.17 (d, J = 6.4 Hz, 3H), 0.87 (t, J = 6.8 Hz, 3H).

**<sup>13</sup>C NMR** (151 MHz, CDCl<sub>3</sub>) δ 163.79 (d, J = 234.5 Hz), 157.59 (d, J = 17.8 Hz), 153.45 (d, J = 8.9 Hz), 102.89 (d, J = 3.6 Hz), 96.32 (d, J = 36.6 Hz), 47.46, 37.28, 31.92, 29.40, 26.09, 22.73, 21.35 (d, J = 3.5 Hz), 21.00, 14.20.

**<sup>19</sup>F NMR** (565 MHz, CDCl<sub>3</sub>) δ -72.35.

**HRMS (m/z):** (ESI) calc'd [M+H]<sup>+</sup>: 239.1918, found: 239.1909.

### Compound 3am

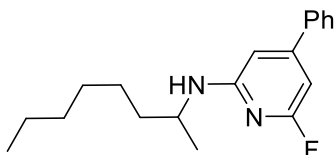

According to **Condition A** at 100 °C for 6 h. *cis*-4-octene (78 μL, 0.50 mmol) and aminopyridine **2m** (19 mg, 0.10 mmol) was allowed to react, and the product was purified by flash column chromatography (SiO<sub>2</sub>; 97.5:2.5 hexanes:EA) to afford compound **3am** (22 mg, 72%) as a yellow oil. The regioselectivity of the reaction was determined to be 89% by GC. Notes: Contain 10% inseparable isomers.

**<sup>1</sup>H NMR** (600 MHz, CDCl<sub>3</sub>) δ 7.60 – 7.53 (m, 2H), 7.48 – 7.38 (m, 3H), 6.35 (s, 1H), 6.32 (s, 1H), 4.47 (d, J = 8.3 Hz, 1H), 3.84 – 3.76 (m, 1H), 1.58 – 1.47 (m, 2H), 1.42 – 1.35 (m, 2H), 1.34 – 1.24 (m, 6H), 1.22 (d, J = 6.4 Hz, 3H), 0.88 (t, J = 6.8 Hz, 3H).

**<sup>13</sup>C NMR** (151 MHz, CDCl<sub>3</sub>) δ 164.17 (d, J = 234.8 Hz), 157.94 (d, J = 18.3 Hz), 154.97 (d, J = 9.0 Hz), 138.79 (d, J = 3.5 Hz), 129.17, 129.04, 127.06, 100.75 (d, J = 3.9 Hz), 93.96 (d, J = 38.0 Hz), 47.61, 37.28, 31.93, 29.42, 26.11, 22.74, 21.03, 14.20.

**<sup>19</sup>F NMR** (565 MHz, CDCl<sub>3</sub>) δ -70.71.

**HRMS (m/z):** (ESI) calc'd [M+K]<sup>+</sup>: 339.1634, found: 339.1635.

### Compound 3an

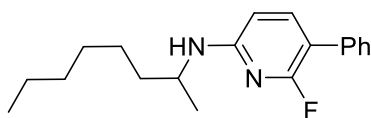

According to **Condition A** at 100 °C for 6 h. *cis*-4-octene (78  $\mu$ L, 0.50 mmol) and aminopyridine **2n** (19 mg, 0.10 mmol) was allowed to react, and the product was purified by flash column chromatography (SiO<sub>2</sub>; 97.5:2.5 hexanes:EA) to afford compound **3an** (24 mg, 80%) as a yellow oil. The regioselectivity of the reaction was determined to be 90% by GC. Notes: Contain 10% inseparable isomers.

<sup>1</sup>H NMR (600 MHz, CDCl<sub>3</sub>)  $\delta$  7.61 (dd, J = 10.1, 8.2 Hz, 1H), 7.53 – 7.47 (m, 2H), 7.40 (t, J = 7.6 Hz, 2H), 7.32 – 7.27 (m, 1H), 6.27 (dd, J = 8.2, 1.8 Hz, 1H), 4.44 (s, 1H), 3.77 (p, J = 6.1 Hz, 1H), 1.60 – 1.46 (m, 2H), 1.43 – 1.36 (m, 2H), 1.34 – 1.25 (m, 6H), 1.22 (d, J = 6.2 Hz, 3H), 0.88 (t, J = 6.8 Hz, 3H).

<sup>13</sup>C NMR (151 MHz, CDCl<sub>3</sub>)  $\delta$  160.46, 158.88, 156.59 (d, J = 17.1 Hz), 141.81 (d, J = 5.1 Hz), 135.14 (d, J = 5.4 Hz), 128.48, 126.76, 109.58 (d, J = 27.7 Hz), 103.30 (d, J = 4.1 Hz), 47.52, 37.16, 31.79, 29.27, 25.99, 22.61, 20.91, 14.07.

<sup>19</sup>F NMR (565 MHz, CDCl<sub>3</sub>)  $\delta$  -73.27.

HRMS (*m/z*): (ESI) calc'd [M+Na]<sup>+</sup>: 323.1894, found: 323.1887.

### Compound 3ao

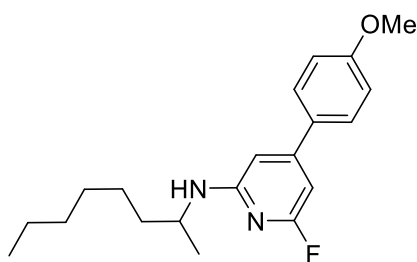

According to **Condition A** at 100 °C for 6 h. *cis*-4-octene (78  $\mu$ L, 0.50 mmol) and aminopyridine **2o** (22 mg, 0.10 mmol) was allowed to react, and the product was purified by flash column chromatography (SiO<sub>2</sub>; 95:5 hexanes:EA) to afford compound **3ao** (20 mg, 61%) as a yellow oil. The regioselectivity of the reaction was determined to be 87% by GC.

[Return to table of contents]

**<sup>1</sup>H NMR** (600 MHz, CDCl<sub>3</sub>) δ 7.54 – 7.50 (m, 2H), 6.99 – 6.95 (m, 2H), 6.31 (s, 1H), 6.29 (s, 1H), 4.46 (s, 1H), 3.85 (s, 3H), 3.78 (q, J = 6.4 Hz, 1H), 1.59 – 1.45 (m, 2H), 1.56 – 1.46 (m, 2H), 1.34 – 1.24 (m, 6H), 1.22 (d, J = 6.4 Hz, 3H), 0.88 (t, J = 6.9 Hz, 3H).

**<sup>13</sup>C NMR** (151 MHz, CDCl<sub>3</sub>) δ 164.17 (d, J = 234.7 Hz), 160.63, 157.88 (d, J = 18.0 Hz), 154.45 (d, J = 9.1 Hz), 131.02 (d, J = 3.4 Hz), 128.23, 114.44, 100.06 (d, J = 3.4 Hz), 93.42 (d, J = 37.7 Hz), 55.52, 47.61, 37.29, 31.93, 29.42, 26.12, 22.74, 21.03, 14.20.

**<sup>19</sup>F NMR** (565 MHz, CDCl<sub>3</sub>) δ -71.17.

**HRMS** (*m/z*): (ESI) calc'd [M+ACN+Na]<sup>+</sup>: 394.2264, found: 394.2266.

### Compound 3ap

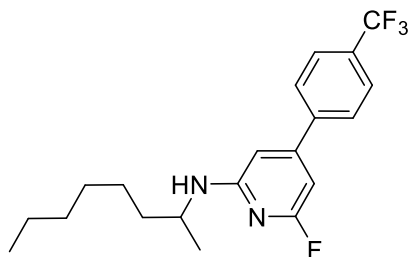

According to **Condition A** at 100 °C for 6 h. *cis*-4-octene (78 μL, 0.50 mmol) and aminopyridine **2p** (26 mg, 0.10 mmol) was allowed to react, and the product was purified by flash column chromatography (SiO<sub>2</sub>; 97.5:2.5 hexanes:EA) to afford compound **3ap** (17 mg, 47%) as a yellow oil. The regioselectivity of the reaction was determined to be 93% by GC.

**<sup>1</sup>H NMR** (600 MHz, CDCl<sub>3</sub>) δ 7.71 (d, J = 8.1 Hz, 2H), 7.66 (d, J = 8.0 Hz, 2H), 6.33 (s, 1H), 6.30 (s, 1H), 4.52 (d, J = 8.2 Hz, 1H), 3.83 – 3.76 (m, 1H), 1.58 – 1.49 (m, 2H), 1.44 – 1.36 (m, 2H), 1.34 – 1.24 (m, 6H), 1.23 (d, J = 6.4 Hz, 3H), 0.88 (t, J = 6.8 Hz, 3H).

**<sup>13</sup>C NMR** (151 MHz, CDCl<sub>3</sub>) δ 164.06 (d, J = 235.5 Hz), 157.92 (d, J = 18.1 Hz), 153.26 (d, J = 9.1 Hz), 142.22 (d, J = 3.1 Hz), 131.01 (q, J = 32.6 Hz), 127.34, 125.88 (q, J = 3.8 Hz), 123.99 (q, J = 272.1 Hz), 100.88, 93.85 (d, J = 38.4 Hz), 47.50, 37.11, 31.78, 29.26, 25.97, 22.60, 20.85, 14.05.

**<sup>19</sup>F NMR** (565 MHz, CDCl<sub>3</sub>) δ -62.64, -69.78.

**HRMS** (*m/z*): (ESI) calc'd [M+H]<sup>+</sup>: 369.1949, found: 369.1951.



### Compound 3aq

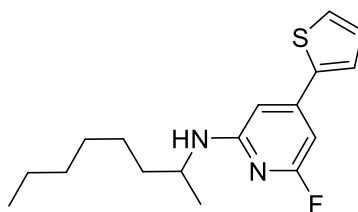

According to **Condition A** at 100 °C for 12 h. *cis*-4-octene (78  $\mu$ L, 0.50 mmol) and aminopyridine **2q** (19 mg, 0.10 mmol) was allowed to react, and the product was purified by flash column chromatography (SiO<sub>2</sub>; 97.5:2.5 hexanes:EA) to afford compound **3aq** (15 mg, 49%) as a yellow oil. The regioselectivity of the reaction was determined to be 86% by GC.

**<sup>1</sup>H NMR** (600 MHz, CDCl<sub>3</sub>)  $\delta$  7.41 (d, *J* = 3.6 Hz, 1H), 7.37 (d, *J* = 5.0 Hz, 1H), 7.10 (dd, *J* = 5.1, 3.7 Hz, 1H), 6.35 (s, 1H), 6.33 (s, 1H), 4.45 (d, *J* = 8.4 Hz, 1H), 3.79 (p, *J* = 6.7 Hz, 1H), 1.58 – 1.46 (m, 2H), 1.42 – 1.34 (m, 2H), 1.34 – 1.23 (m, 6H), 1.21 (d, *J* = 6.4 Hz, 3H), 0.88 (t, *J* = 6.8 Hz, 3H).

**<sup>13</sup>C NMR** <sup>13</sup>C NMR (151 MHz, CDCl<sub>3</sub>)  $\delta$  164.12 (d, *J* = 234.3 Hz), 157.89 (d, *J* = 18.5 Hz), 147.14 (d, *J* = 9.8 Hz), 141.47 (d, *J* = 4.4 Hz), 128.10, 126.67, 125.21, 99.03, 92.31 (d, *J* = 39.1 Hz), 47.44, 37.14, 31.79, 29.28, 25.97, 22.61, 20.89, 14.07.

**<sup>19</sup>F NMR** (565 MHz, CDCl<sub>3</sub>)  $\delta$  -70.54.

**HRMS** (*m/z*): (ESI) calc'd [2M+Na]<sup>+</sup>: 635.3024, found: 635.3037.

### Compound 3ar

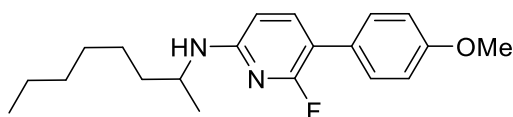

According to **Condition A** at 100 °C for 6 h. *cis*-4-octene (78  $\mu$ L, 0.50 mmol) and aminopyridine **2r** (22 mg, 0.10 mmol) was allowed to react, and the product was purified by flash column chromatography (SiO<sub>2</sub>; 95:5 hexanes:EA) to afford compound **3ar** (15 mg, 46%) as a yellow oil. The regioselectivity of the reaction was determined to be 92% by GC.

**<sup>1</sup>H NMR** (600 MHz, CDCl<sub>3</sub>)  $\delta$  7.57 (t, *J* = 10.2 Hz, 1H), 7.42 (d, *J* = 8.2 Hz, 2H), 6.94 (d, *J* = 8.4 Hz, 2H), 6.26 (dd, *J* = 8.2, 1.8 Hz, 1H), 3.83 (s, 3H), 3.75 (q, *J* = 6.4 Hz, 1H), 1.56 – 1.45 (m, 2H), 1.43 – 1.34 (m, 2H), 1.34 – 1.24 (m, 7H), 1.21 (d, *J* = 6.4 Hz, 3H), 0.88 (t, *J* = 6.8 Hz, 3H).

[Return to table of contents]

**<sup>13</sup>C NMR** (151 MHz, CDCl<sub>3</sub>) δ 159.60 (d, J = 238.0 Hz), 158.73, 156.31 (d, J = 16.7 Hz), 141.75 (d, J = 5.3 Hz), 129.43 (d, J = 3.0 Hz), 127.64 (d, J = 5.1 Hz), 114.12, 109.47 (d, J = 27.8 Hz), 103.40 (d, J = 4.2 Hz), 55.45, 47.68, 37.28, 31.93, 29.41, 26.12, 22.74, 21.03, 14.20.

**<sup>19</sup>F NMR** (565 MHz, CDCl<sub>3</sub>) δ -73.73.

**HRMS** (*m/z*): (ESI) calc'd [M+Na]<sup>+</sup>: 353.1999, found: 353.2004.

### Compound 3as

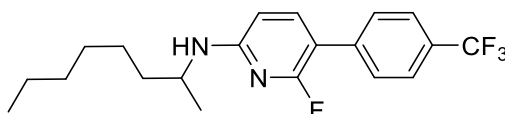

According to **Condition A** at 100 °C for 6 h. *cis*-4-octene (78 μL, 0.50 mmol) and aminopyridine **2s** (26 mg, 0.10 mmol) was allowed to react, and the product was purified by flash column chromatography (SiO<sub>2</sub>; 97.5:2.5 hexanes:EA) to afford compound **3as** (17 mg, 47%) as a yellow oil. The regioselectivity of the reaction was determined to be 93% by GC.

**<sup>1</sup>H NMR** (600 MHz, CDCl<sub>3</sub>) δ 7.70 – 7.52 (m, 5H), 6.29 (d, J = 8.3 Hz, 1H), 4.55 (s, 1H), 3.79 (p, J = 6.2 Hz, 1H), 1.57 – 1.48 (m, 2H), 1.42 – 1.35 (m, 2H), 1.34 – 1.26 (m, 6H), 1.23 (d, J = 6.4 Hz, 3H), 0.88 (t, J = 6.9 Hz, 3H).

**<sup>13</sup>C NMR** (151 MHz, CDCl<sub>3</sub>) δ 159.75 (d, J = 238.9 Hz), 157.15 (d, J = 17.5 Hz), 141.55 (d, J = 4.8 Hz), 138.81 (d, J = 5.3 Hz), 128.66 (q, J = 32.5 Hz), 128.26 (d, J = 3.4 Hz), 125.41 (q, J = 3.8 Hz), 124.28 (q, J = 271.9 Hz), 107.96 (d, J = 27.3 Hz), 103.61, 47.55, 37.10, 31.78, 29.25, 25.98, 22.60, 20.86, 14.06.

**<sup>19</sup>F NMR** (565 MHz, CDCl<sub>3</sub>) δ -62.44, -72.49.

**HRMS** (*m/z*): (ESI) calc'd [2M+H]<sup>+</sup>: 737.3825, found: 737.3846.

## 8. Product Derivatization by S<sub>N</sub>Ar

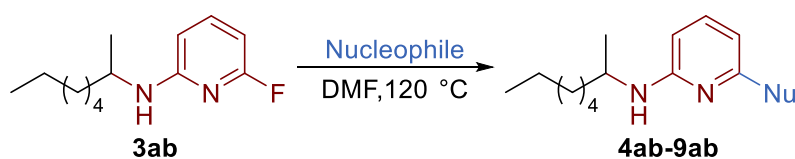

**Condition D:** In a nitrogen-filled glovebox, a 1-dram vial was charged sequentially with 6-fluoro-N-(octan-2-yl)pyridin-2-amine (**3ab**) (22 mg, 0.10 mmol, 1.0 equiv), nucleophile (0.30 to 1.0 mmol, 3.0 to 10.0 equiv), DMF (0.2 mL), and a magnetic stir bar. The vial was capped and removed from the glovebox. The reaction was heated at 120 to 130 °C in an aluminium heating block. The crude material was extracted with ether/H<sub>2</sub>O 5 times to remove residual DMF, concentrated in vacuo, and purified by flash column chromatography to afford the product.

### Compound 4ab

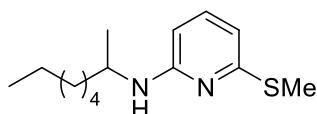

According to **Condition D** at 120 °C for 18 h. sodium methanethiolate (NaSMe) (71 mg, 1.0 mmol) was used as the nucleophile, and the product was purified by flash column chromatography (SiO<sub>2</sub>; 97.5:2.5 hexanes:EA) to afford compound **4ab** (21 mg, 83%) as a yellow oil.

<sup>1</sup>H NMR (600 MHz, CDCl<sub>3</sub>) δ 7.22 (t, J = 7.8 Hz, 1H), 6.43 (d, J = 7.5 Hz, 1H), 6.02 (d, J = 8.2 Hz, 1H), 4.33 (s, 1H), 3.73 (h, J = 7.4, 7.0 Hz, 1H), 2.49 (s, 3H), 1.58 – 1.51 (m, 1H), 1.50 – 1.41 (m, 1H), 1.40 – 1.33 (m, 2H), 1.32 – 1.25 (m, 6H), 1.18 (d, J = 6.4 Hz, 3H), 0.88 (t, J = 6.7 Hz, 3H).

<sup>13</sup>C NMR (151 MHz, CDCl<sub>3</sub>) δ 158.11, 158.06, 137.50, 109.24, 101.66, 47.34, 37.38, 31.95, 29.47, 26.23, 22.75, 21.01, 14.20, 13.41.

**HRMS (m/z):** (ESI) calc'd [2M+ACN+Na]<sup>+</sup>: 568.3478, found: 568.3472.

### Compound 5ab

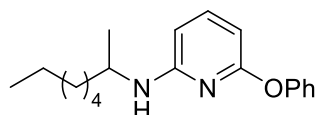

According to **Condition D** at 120 °C for 36 h. potassium phenoxide (KOPh) (39 mg, 0.30 mmol) was used as the nucleophile, and the product was purified by flash column chromatography (SiO<sub>2</sub>; 97.5:2.5 hexanes:EA) to afford compound **5ab** (24 mg, 80%) as a yellow oil.

[Return to table of contents]

**<sup>1</sup>H NMR** (600 MHz, CDCl<sub>3</sub>) δ 7.36 (q, J = 7.8 Hz, 3H), 7.17 – 7.12 (m, 3H), 6.03 (d, J = 8.0 Hz, 1H), 5.97 (d, J = 7.8 Hz, 1H), 4.30 (d, J = 8.1 Hz, 1H), 3.62 (hept, J = 6.5 Hz, 1H), 1.53 – 1.46 (m, 1H), 1.44 – 1.37 (m, 1H), 1.36 – 1.20 (m, 8H), 1.14 (d, J = 6.4 Hz, 3H), 0.88 (t, J = 6.9 Hz, 3H).

**<sup>13</sup>C NMR** (151 MHz, CDCl<sub>3</sub>) δ 163.28, 157.85, 154.86, 140.54, 129.51, 124.17, 121.17, 100.30, 97.54, 47.45, 37.30, 31.95, 29.44, 26.15, 22.74, 20.93, 14.21.

**HRMS (m/z):** (ESI) calc'd [2M+Na]<sup>+</sup>: 619.3982, found: 619.3962.

### Compound 6ab

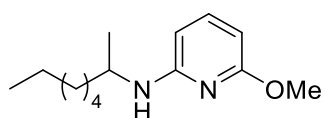

According to **Condition D** at 130 °C for 36 h. lithium methoxide (LiOMe) (11 mg, 0.30 mmol) was used as the nucleophile, and the product was purified by flash column chromatography (SiO<sub>2</sub>; 97.5:2.5 hexanes:EA) to afford compound **4ab** (18 mg, 77%) as a yellow oil.

**<sup>1</sup>H NMR** (600 MHz, CDCl<sub>3</sub>) δ 7.31 (t, J = 7.9 Hz, 1H), 5.97 (d, J = 7.8 Hz, 1H), 5.89 (d, J = 7.9 Hz, 1H), 4.20 (s, 1H), 3.84 (s, 3H), 3.71 (hept, J = 6.6 Hz, 1H), 1.61 – 1.51 (m, 1H), 1.48 – 1.42 (m, 1H), 1.41 – 1.34 (m, 2H), 1.32 – 1.24 (m, 6H), 1.19 (d, J = 6.4 Hz, 3H), 0.88 (t, J = 6.8 Hz, 3H).

**<sup>13</sup>C NMR** (151 MHz, CDCl<sub>3</sub>) δ 163.81, 157.51, 140.02, 97.78, 96.78, 53.15, 47.43, 37.43, 31.97, 29.49, 26.26, 22.76, 21.06, 14.21.

**HRMS (m/z):** (ESI) calc'd [M+Na]<sup>+</sup>: 259.1781, found: 259.1768.

### Compound 7ab

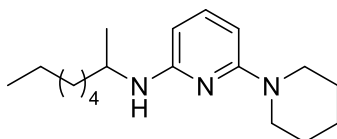

According to **Condition D** at 130 °C for 18 h. piperidine (29 μL, 0.30 mmol) and sodium *tert*-butoxide (NaO<sup>t</sup>Bu) (29 mg, 0.30 mmol) were used as the nucleophile, and the product was purified by flash column chromatography (SiO<sub>2</sub>; 97.5:2.5 hexanes:EA) to afford compound **7ab** (21 mg, 72%) as a yellow oil.

[Return to table of contents]

**<sup>1</sup>H NMR** (600 MHz, CDCl<sub>3</sub>) δ 7.25 (app-d, J = 7.8 Hz, 1H), 5.92 (d, J = 7.8 Hz, 1H), 5.86 (d, J = 7.9 Hz, 1H), 4.05 (s, 1H), 3.75 (q, J = 6.5 Hz, 1H), 1.56 (s, 10H), 1.48 – 1.40 (m, 1H), 1.39 – 1.33 (m, 2H), 1.33 – 1.24 (m, 7H), 1.18 (d, J = 6.4 Hz, 3H), 0.88 (d, J = 6.7 Hz, 3H).

**<sup>13</sup>C NMR** (151 MHz, CDCl<sub>3</sub>) δ 163.37, 157.13, 139.53, 100.26, 98.35, 78.74, 47.34, 37.49, 31.98, 29.50, 29.11, 26.32, 22.76, 21.19, 14.21.

**HRMS (m/z):** (ESI) calc'd [M+ACN+Na]<sup>+</sup>: 535.2676, found: 535.2666.

### Compound 8ab

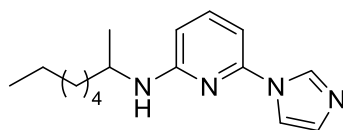

According to **Condition D** at 130 °C for 24 h. imidazole (20 mg, 0.30 mmol) and sodium *tert*-butoxide (NaO<sup>t</sup>Bu) (29 mg, 0.30 mmol) were used as the nucleophile, and the product was purified by flash column chromatography (SiO<sub>2</sub>; 97.5:2.5 hexanes:EA) to afford compound **8ab** (25 mg, 92%) as a yellow oil.

**<sup>1</sup>H NMR** (500 MHz, CD<sub>2</sub>Cl<sub>2</sub>) δ 8.26 (s, 1H), 7.48 (t, J = 7.9 Hz, 1H), 7.09 (s, 1H), 6.55 (d, J = 7.6 Hz, 1H), 6.28 (d, J = 8.3 Hz, 1H), 4.57 (d, J = 8.2 Hz, 1H), 3.89 (hept, J = 6.6 Hz, 1H), 1.60 – 1.55 (m, 1H), 1.55 – 1.46 (m, 1H), 1.40 – 1.35 (m, 2H), 1.34 – 1.26 (m, 6H), 1.22 (d, J = 6.4 Hz, 3H), 0.88 (t, J = 6.7 Hz, 3H).

**<sup>13</sup>C NMR** (126 MHz, CD<sub>2</sub>Cl<sub>2</sub>) δ 158.33, 148.32, 139.93, 135.20, 129.98, 116.54, 105.49, 99.43, 47.55, 37.46, 32.24, 29.72, 26.50, 23.02, 20.95, 14.24.

**HRMS (m/z):** (ESI) calc'd [M+H]<sup>+</sup>: 273.2074, found: 273.2075.

### Compound 9ab

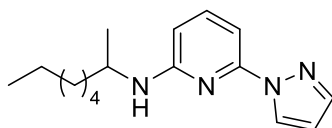

According to **Condition D** at 130 °C for 24 h. pyrazole (20 mg, 0.30 mmol) and sodium *tert*-butoxide (NaO<sup>t</sup>Bu) (29 mg, 0.30 mmol) were used as the nucleophile, and the product was purified by flash

[Return to table of contents]

column chromatography (SiO<sub>2</sub>; 97.5:2.5 hexanes:EA) to afford compound **9ab** (25 mg, 93%) as a yellow oil.

**<sup>1</sup>H NMR** (500 MHz, CD<sub>2</sub>Cl<sub>2</sub>) δ 8.30 (d, J = 2.6 Hz, 1H), 7.48 (s, 1H), 7.32 (t, J = 7.9 Hz, 1H), 6.94 (d, J = 7.7 Hz, 1H), 6.23 (t, J = 2.1 Hz, 1H), 6.08 (d, J = 8.2 Hz, 1H), 4.27 (s, 1H), 3.70 (p, J = 6.3 Hz, 1H), 1.42 (ddt, J = 12.3, 9.3, 6.1 Hz, 1H), 1.37 – 1.29 (m, 1H), 1.23 (hept, J = 5.9 Hz, 2H), 1.19 – 1.08 (m, 6H), 1.05 (d, J = 6.4 Hz, 3H), 0.70 (t, J = 6.6 Hz, 3H).

**<sup>13</sup>C NMR** (151 MHz, CDCl<sub>3</sub>) δ 157.43, 150.50, 141.58, 139.79, 126.91, 107.01, 104.32, 99.76, 47.40, 37.35, 31.96, 29.47, 26.26, 22.76, 21.00, 14.20.

**HRMS** (*m/z*): (ESI) calc'd [M+H]<sup>+</sup>: 273.2074, found: 273.2077.

## 9. NMR Spectra

### Compound 1f

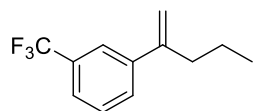

### <sup>1</sup>H NMR

JM4143A-SM-new-1H.1.fid

Speedtype CC08050490

1h.cocnmr.av600 CDCl<sub>3</sub> /opt/nmrdata/u/ senjiema 20

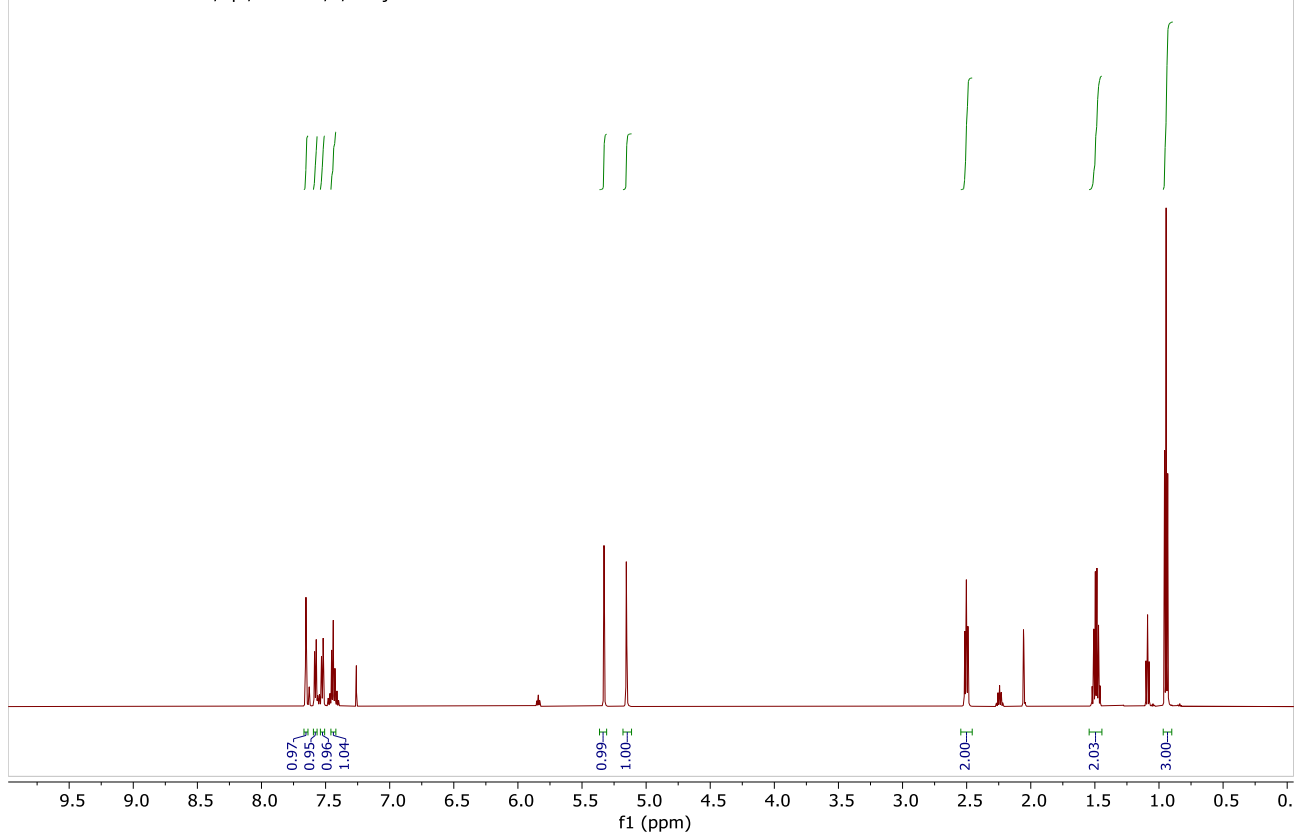

# <sup>13</sup>C NMR

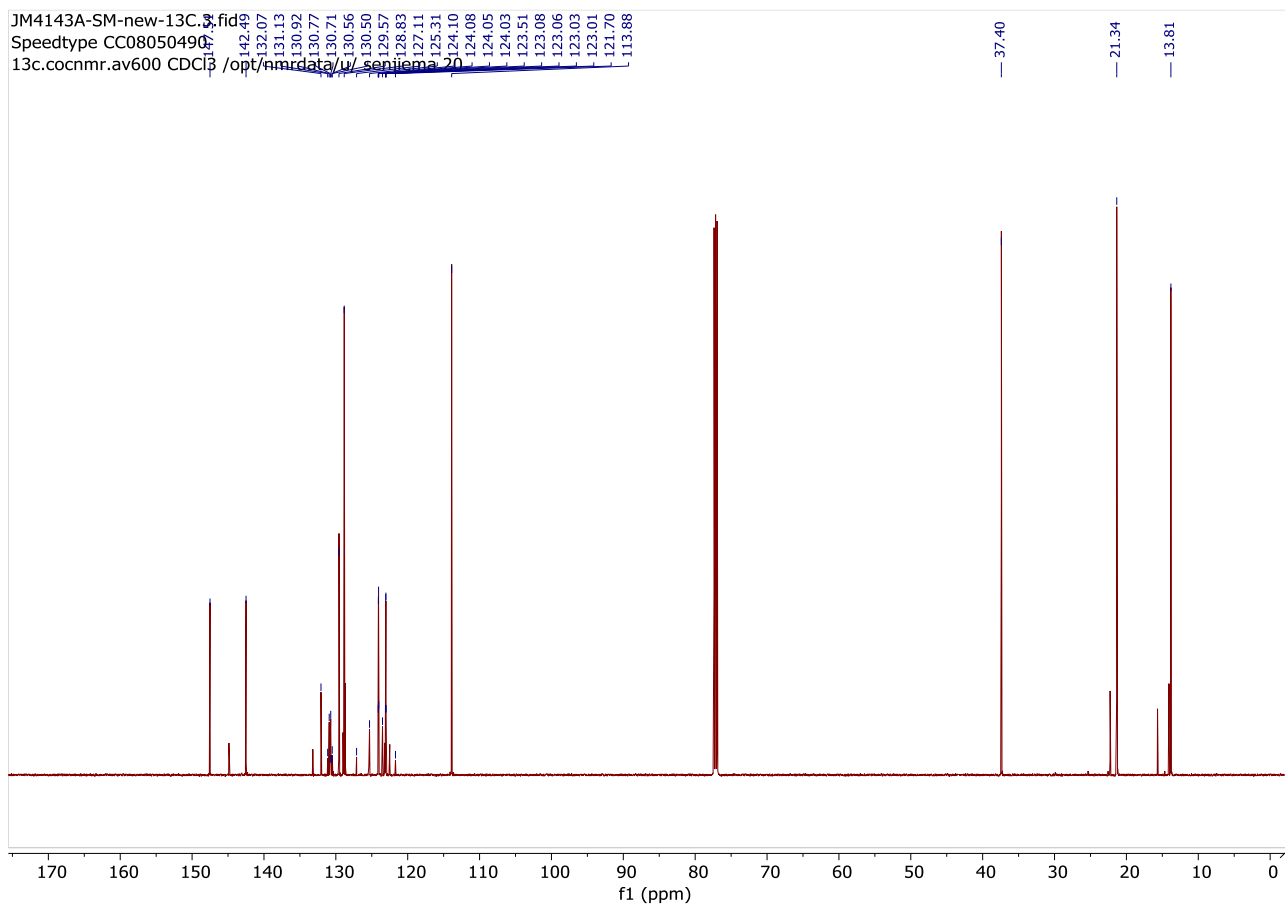



### Compound 1k

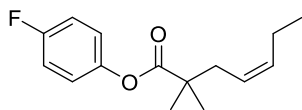

### <sup>1</sup>H NMR

JM4080A\_SM\_1H.22.fid  
Speedtype CC08050715

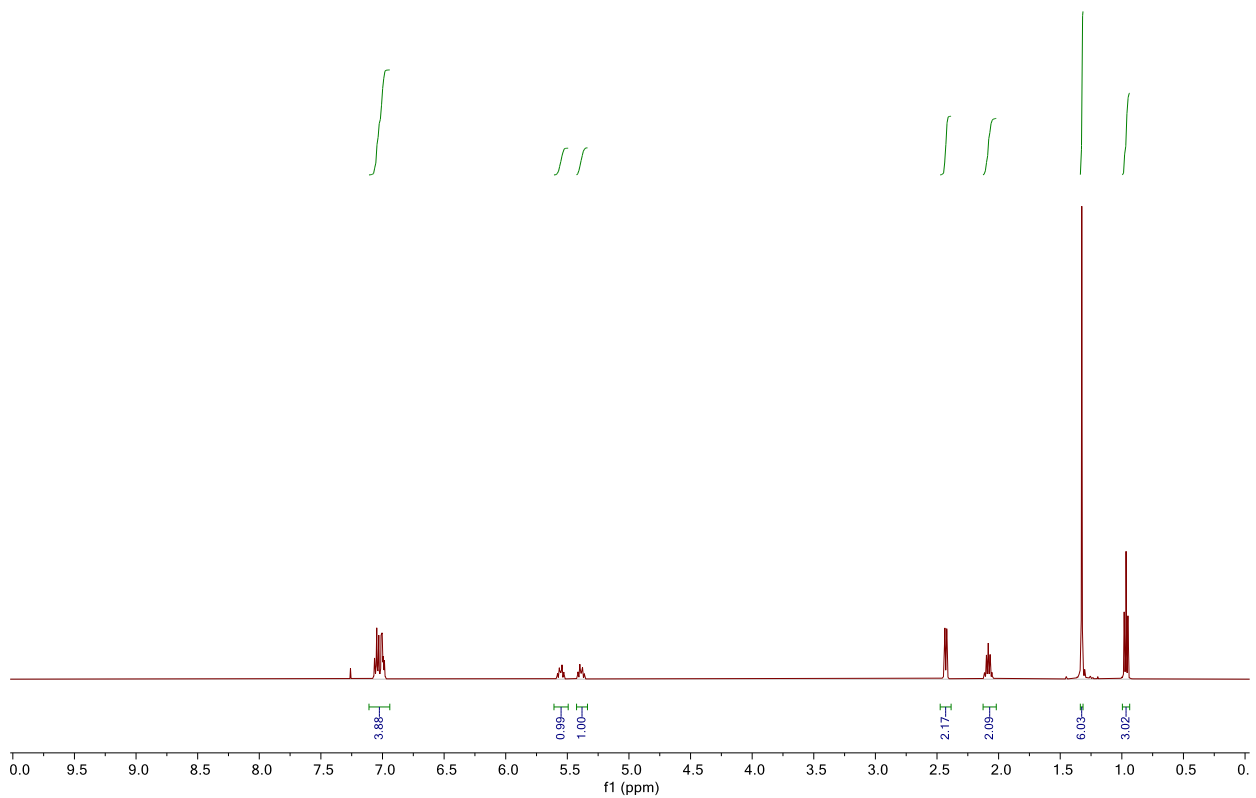

# <sup>13</sup>C NMR

JM4080A\_SM\_13C.23.fid  
Speedtype CC08050715

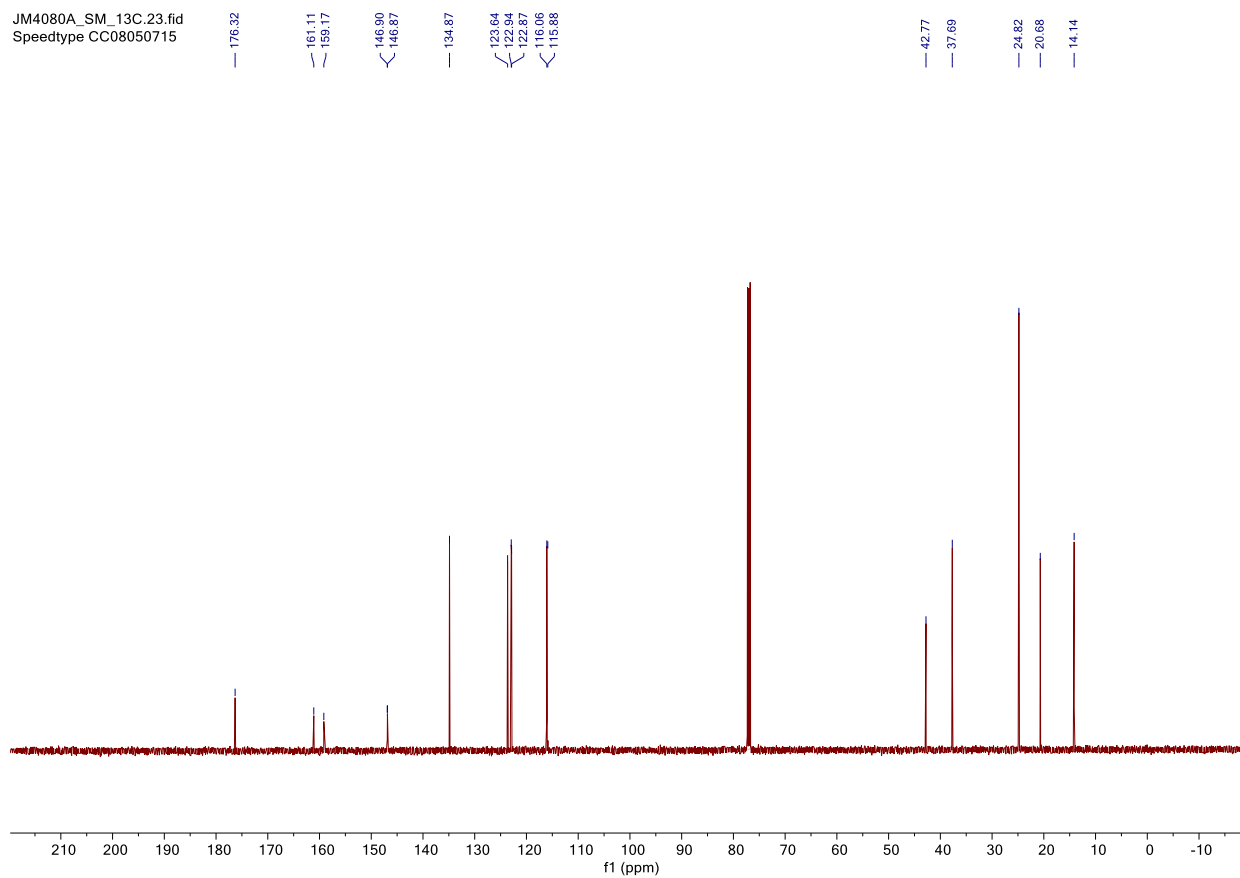

## Compound 11

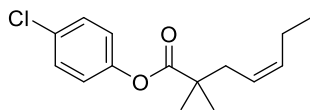

## <sup>1</sup>H NMR

JM4087A\_SM\_1H.22.fid  
Speedtype CC08050715

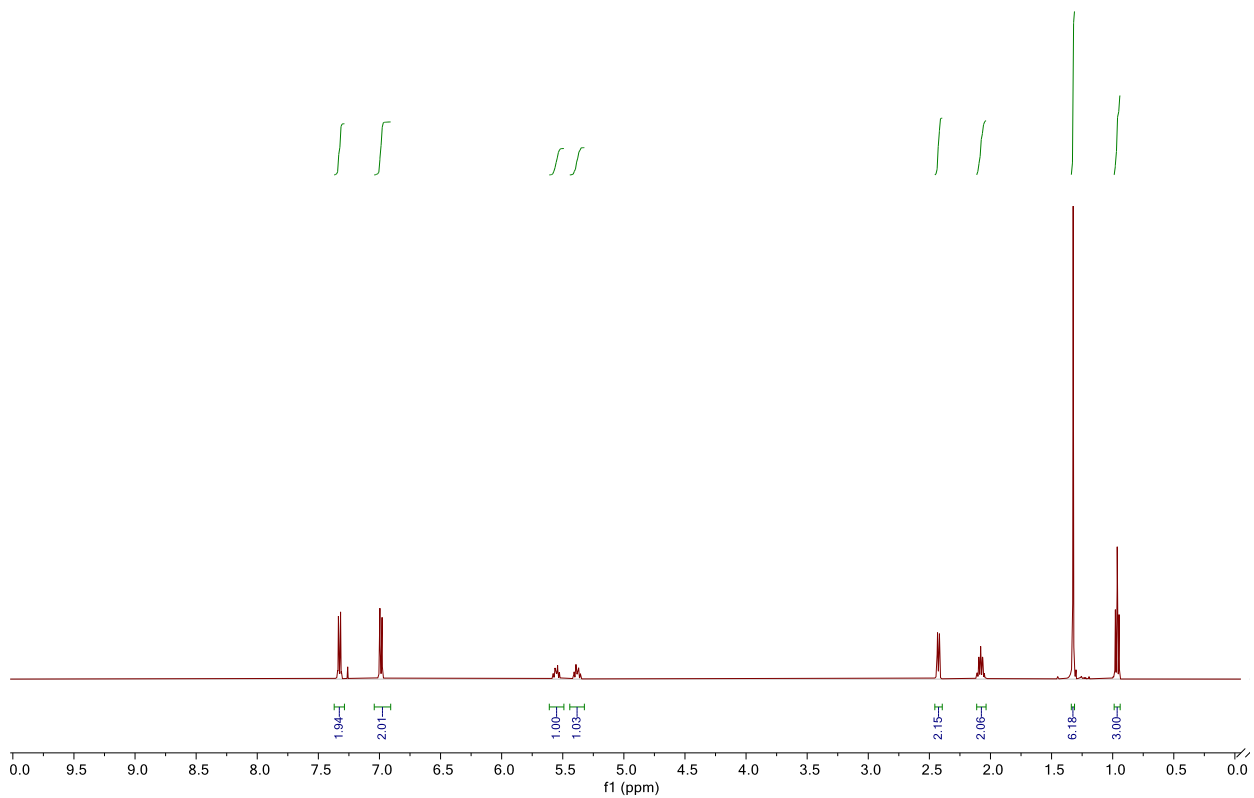

# <sup>13</sup>C NMR

JM4087A\_SM\_13C.23.fid  
Speedtype CC08050715

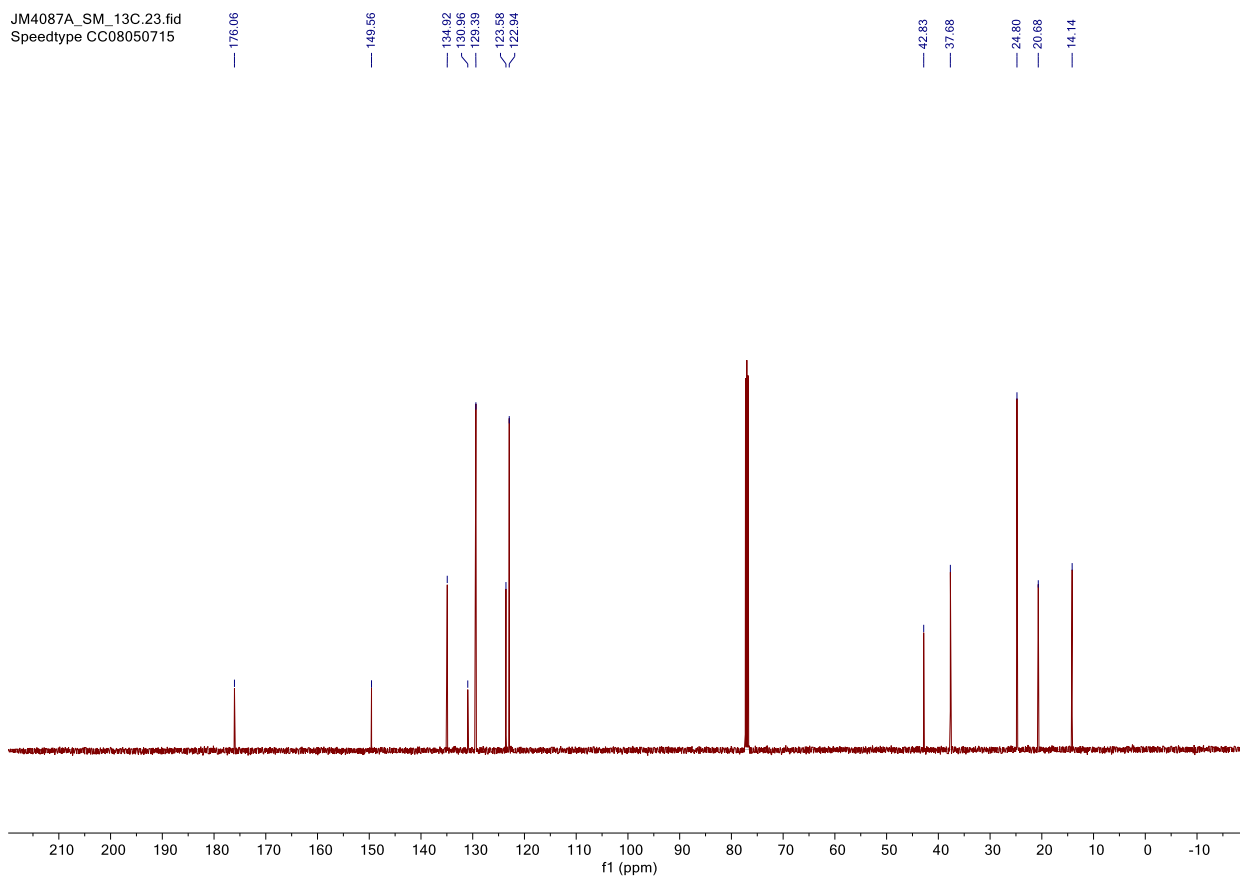

## Compound 1m

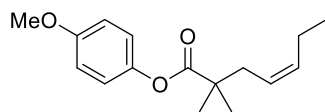

## <sup>1</sup>H NMR

JM4080B\_SM\_1H.22.fid  
Speedtype CC08050715

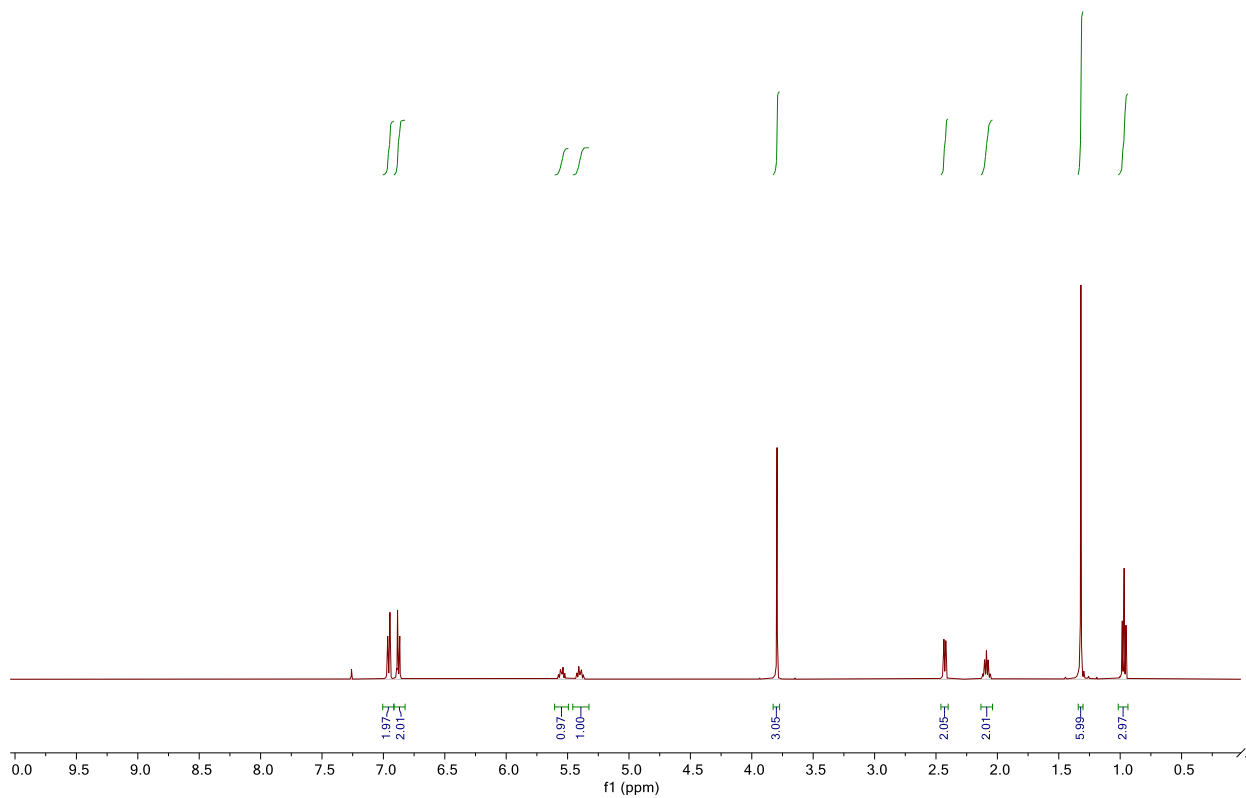

[Return to table of contents]

# <sup>13</sup>C NMR

JM4080B\_SM\_13C.23.fid  
Speedtype CC08050715

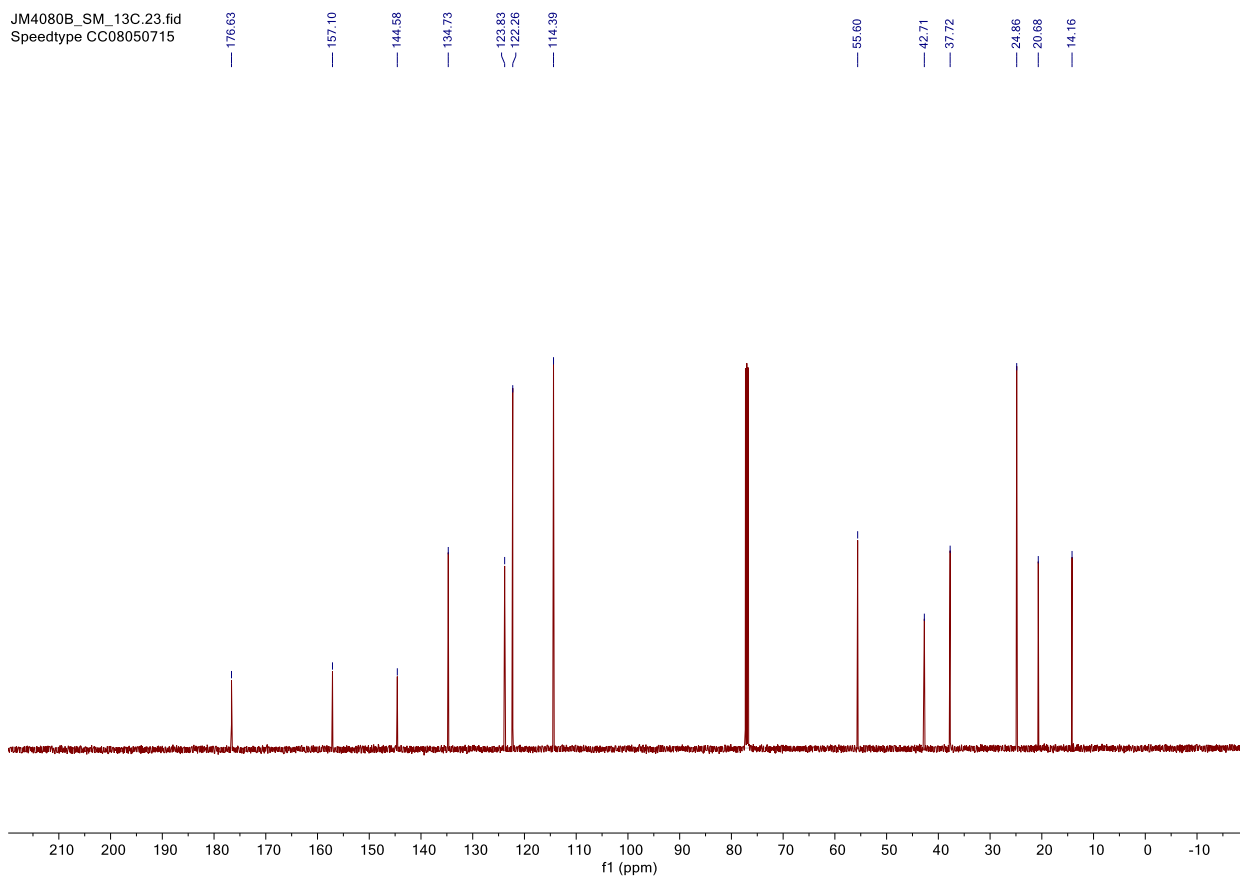

## Compound 1n

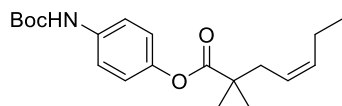

## <sup>1</sup>H NMR

JM4086A\_SM\_1H.22.fid  
Speedtype CC08050715

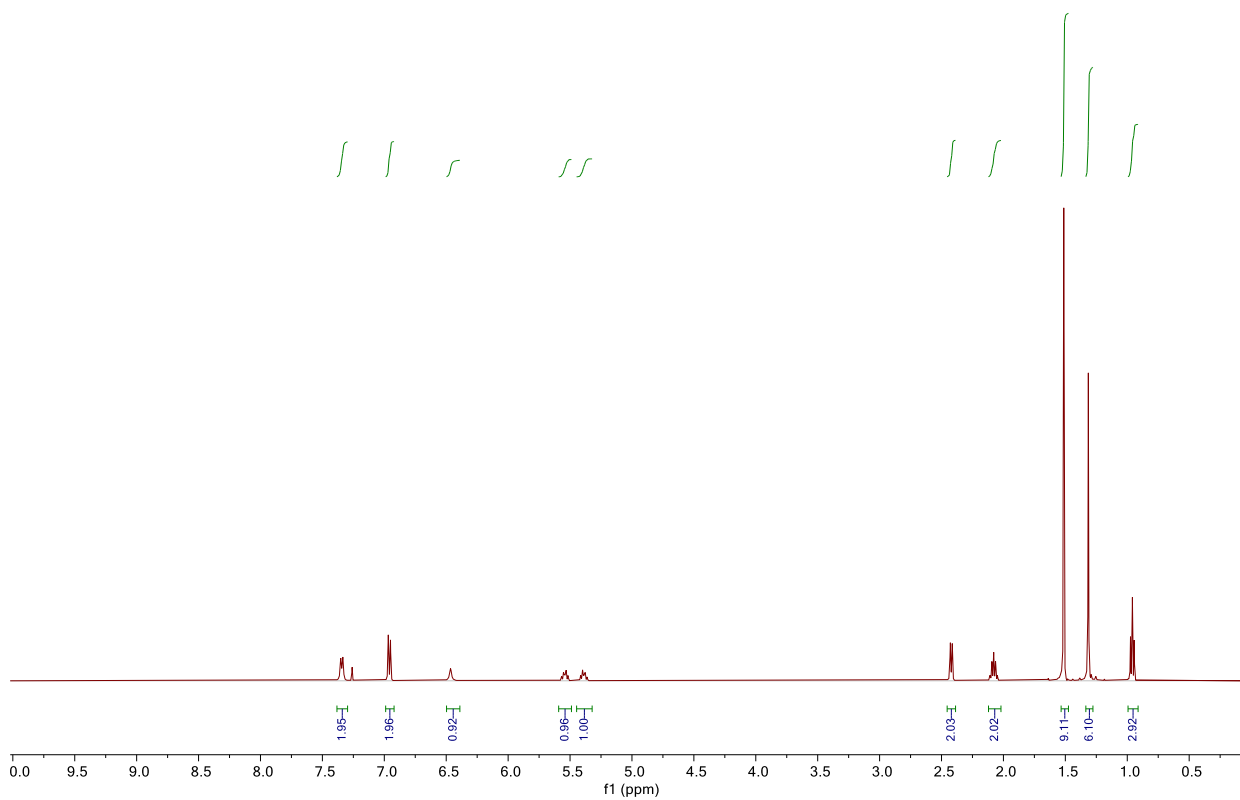

# <sup>13</sup>C NMR

JM4086A\_SM\_13C.23.fid  
Speedtype CC08050715

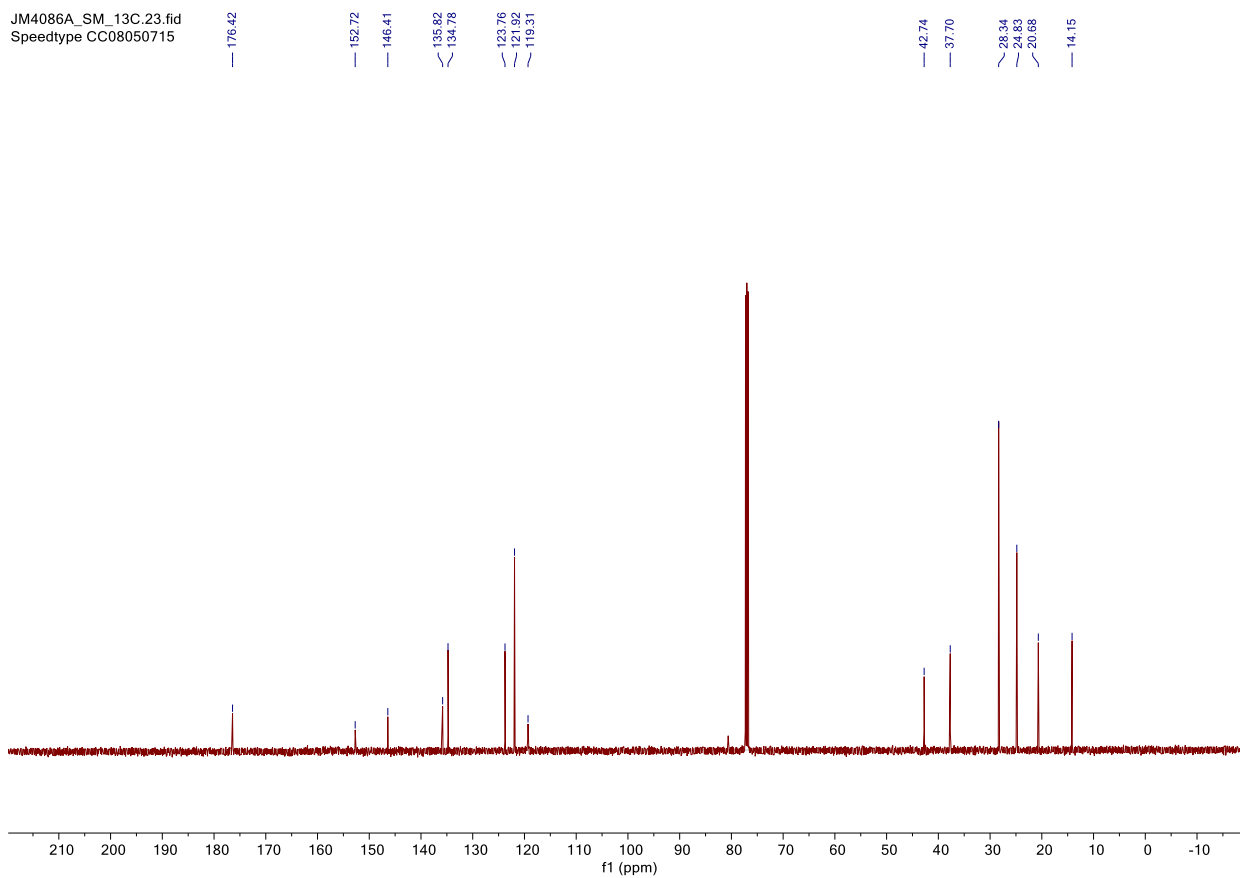



## Compound 1o

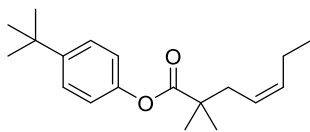

## <sup>1</sup>H NMR

JM4086B\_SM\_1H.22.fid  
Speedtype CC08050715

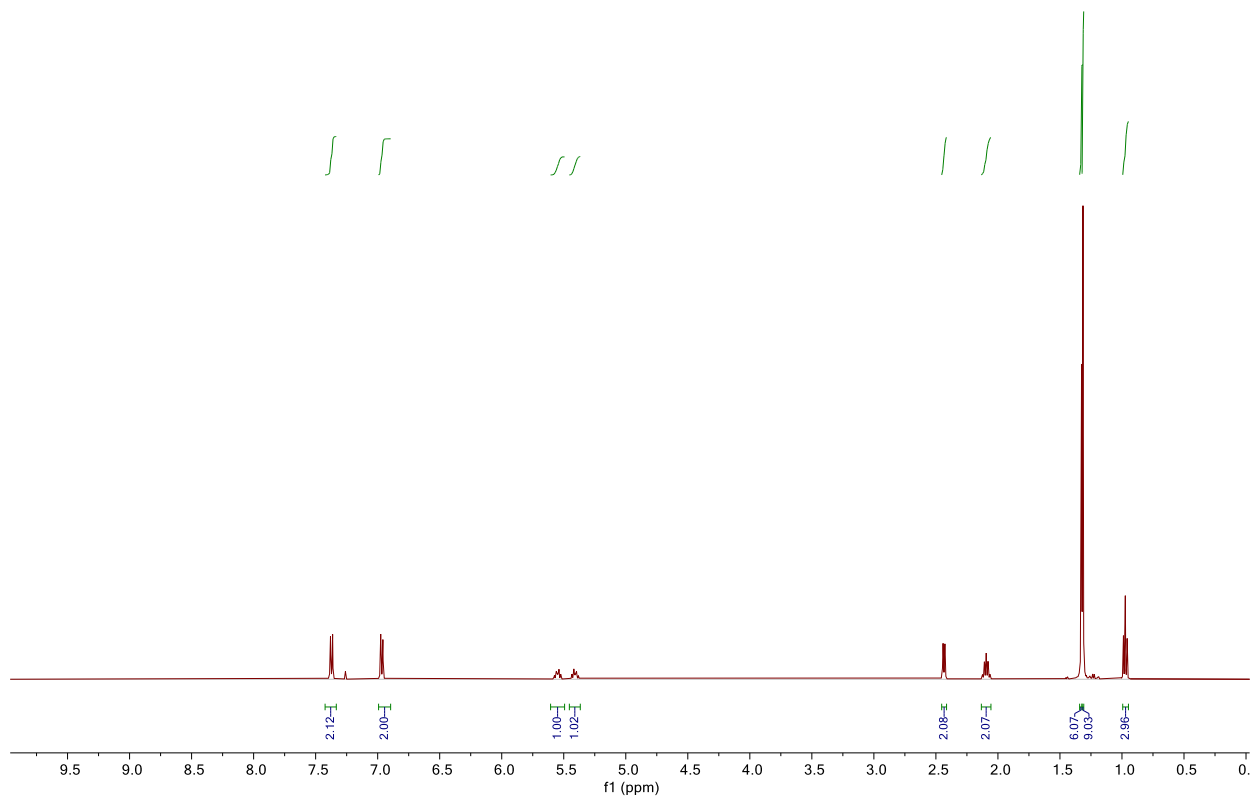

# <sup>13</sup>C NMR

JM4086B\_SM\_13C.23.fid  
Speedtype CC08050715

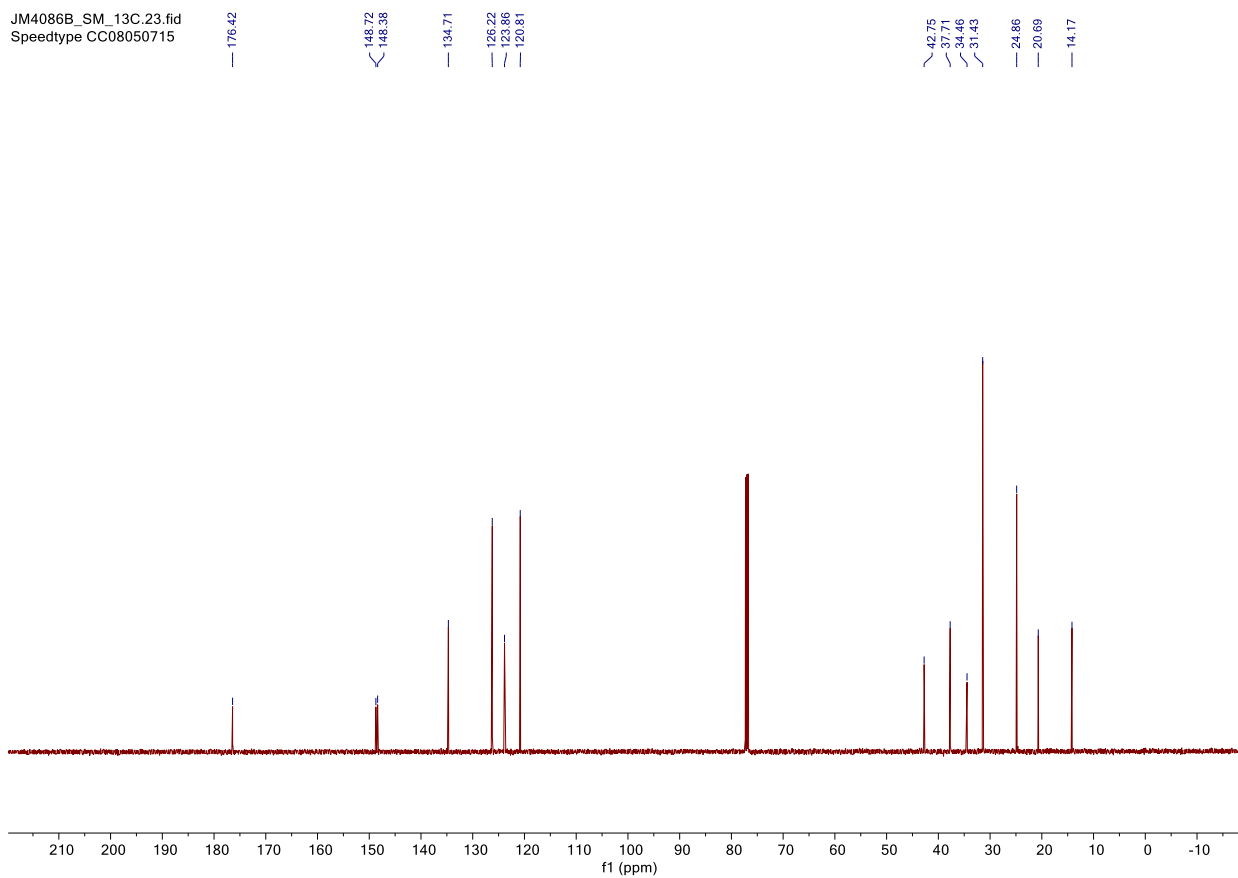

## Compound 1p

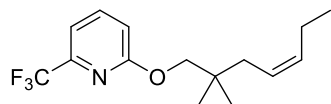

## <sup>1</sup>H NMR

JM4086D\_SM\_1H.22.fid  
Speedtype CC08050715

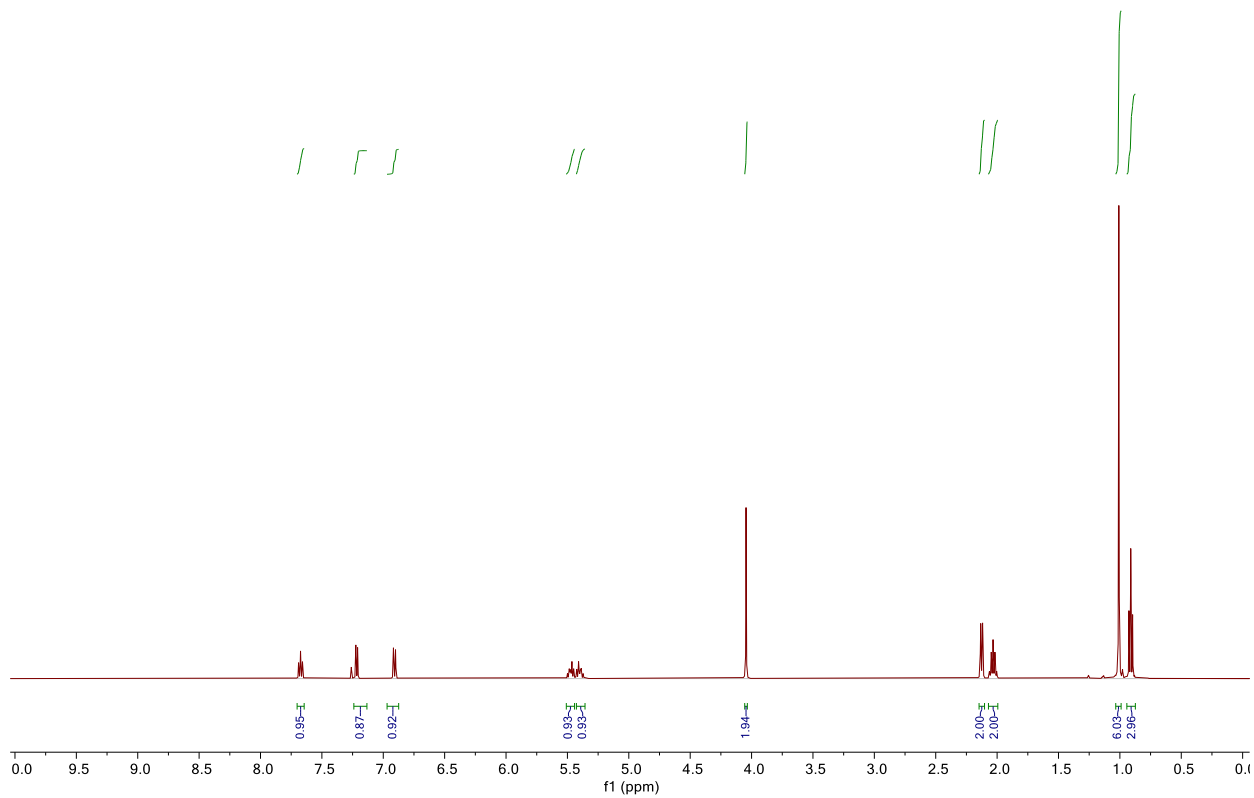

# <sup>13</sup>C NMR

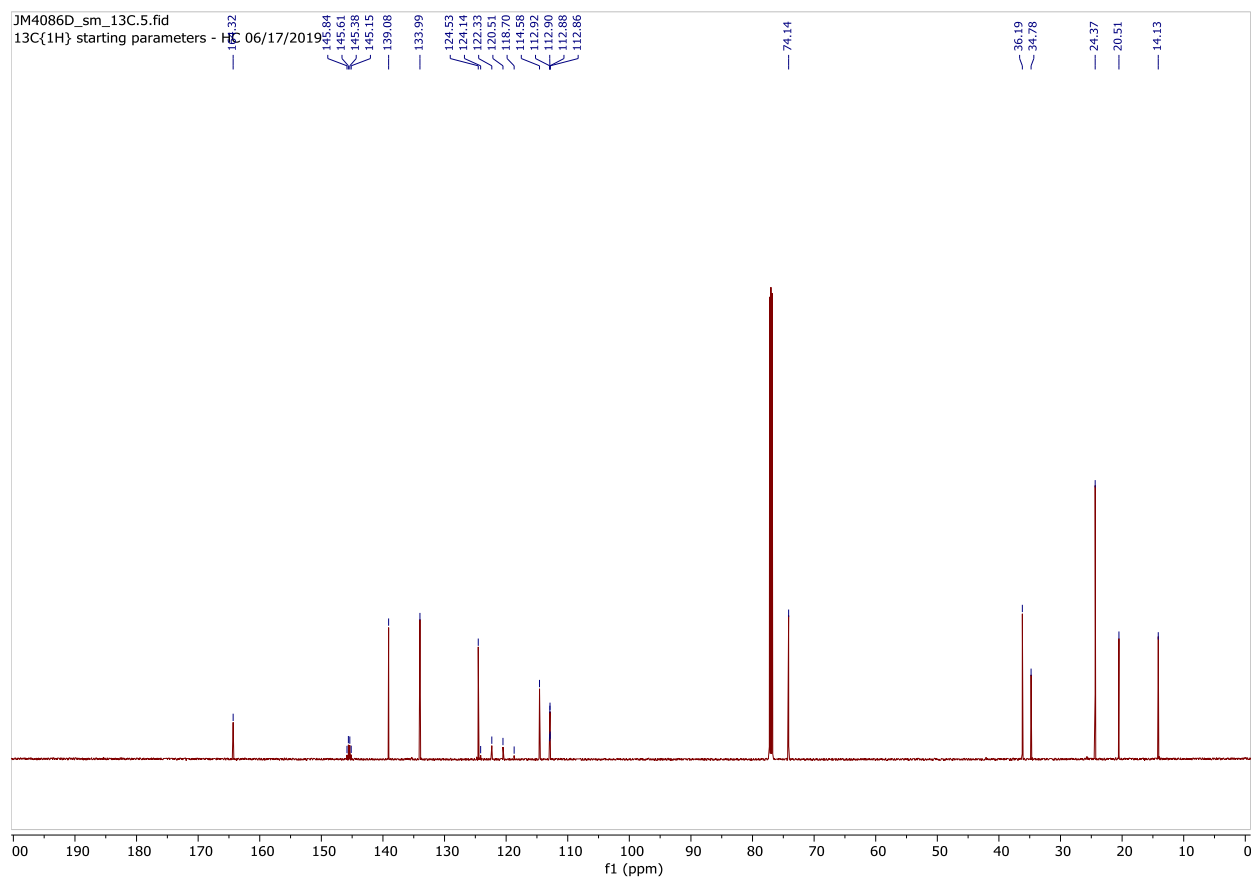

[Return to table of contents]

## Compound 1q

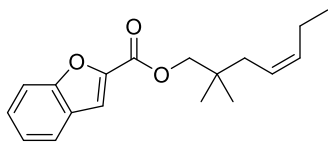

## <sup>1</sup>H NMR

JM4080E\_SM\_1H.22.fid  
Speedtype CC08050715

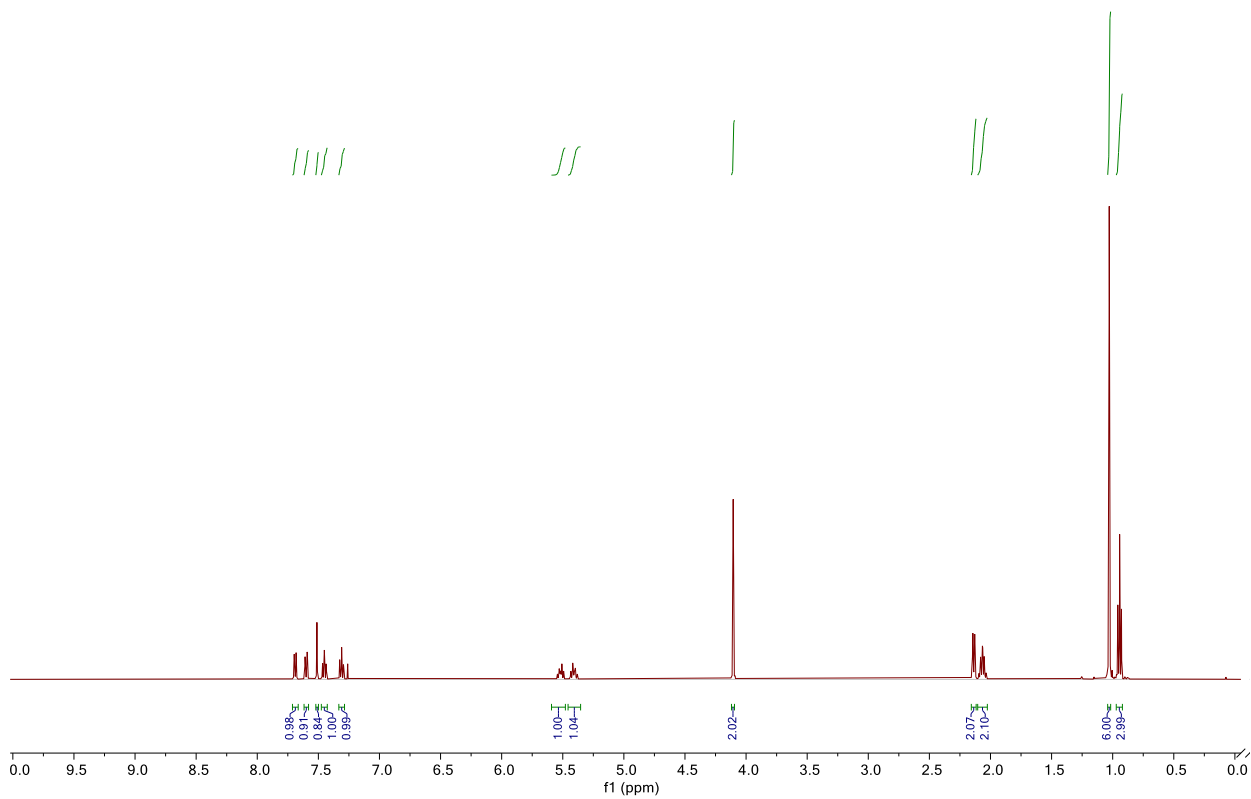

# <sup>13</sup>C NMR

JM4080E\_SM\_13C.23.fid  
Speedtype CC08050715

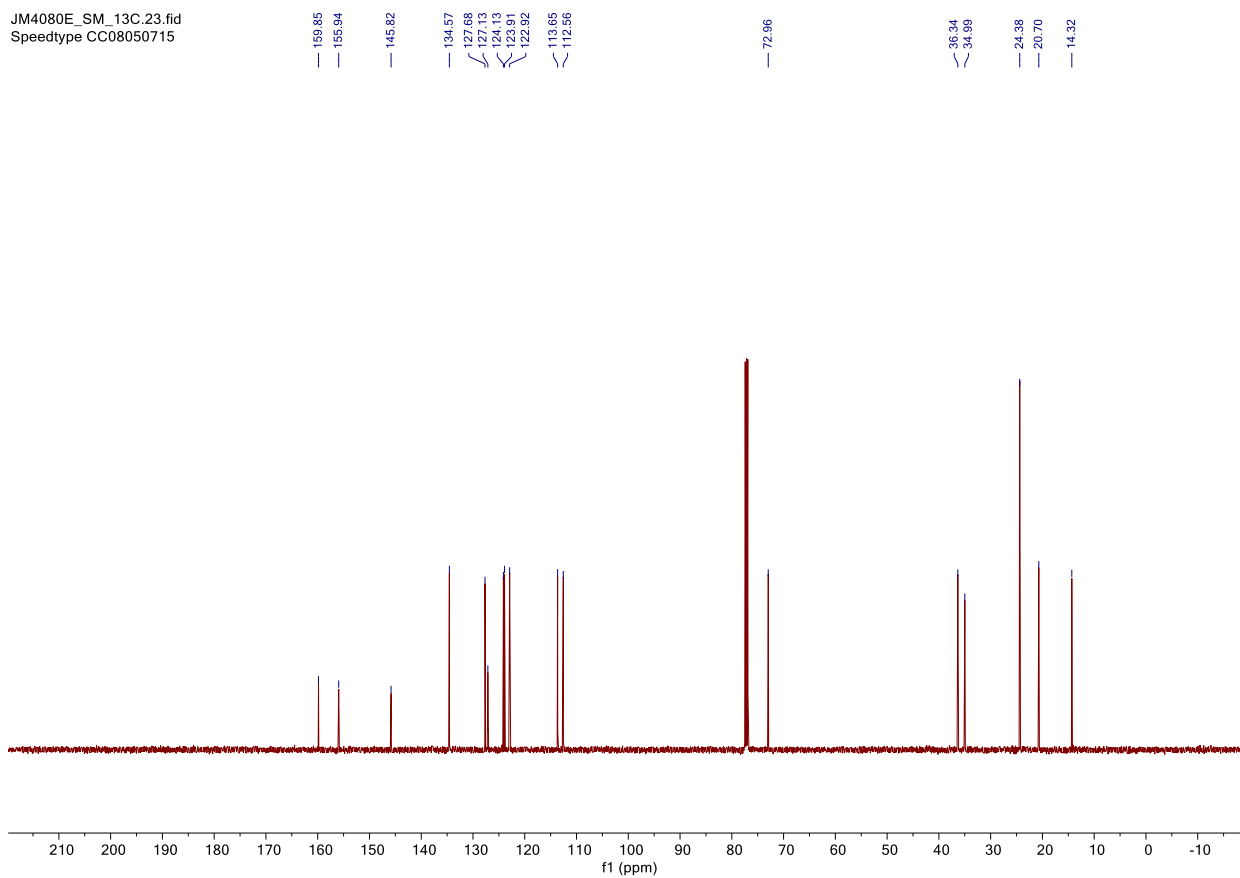

## Compound 1s

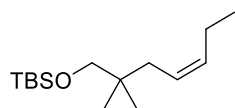

## <sup>1</sup>H NMR

JM4086C\_SM\_1H.22.fid  
Speedtype CC08050715

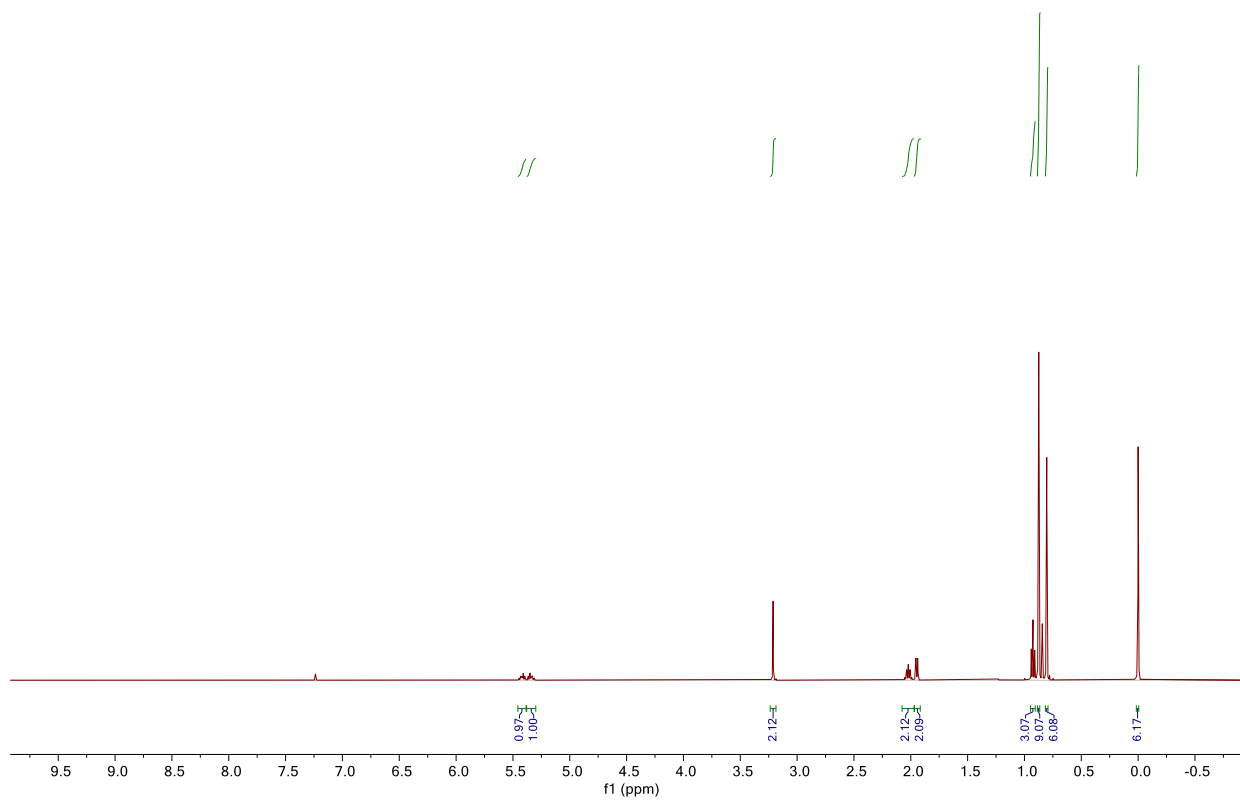

[Return to table of contents]

# <sup>13</sup>C NMR

JM4086C\_SM\_13C.23.fid  
Speedtype CC08050715

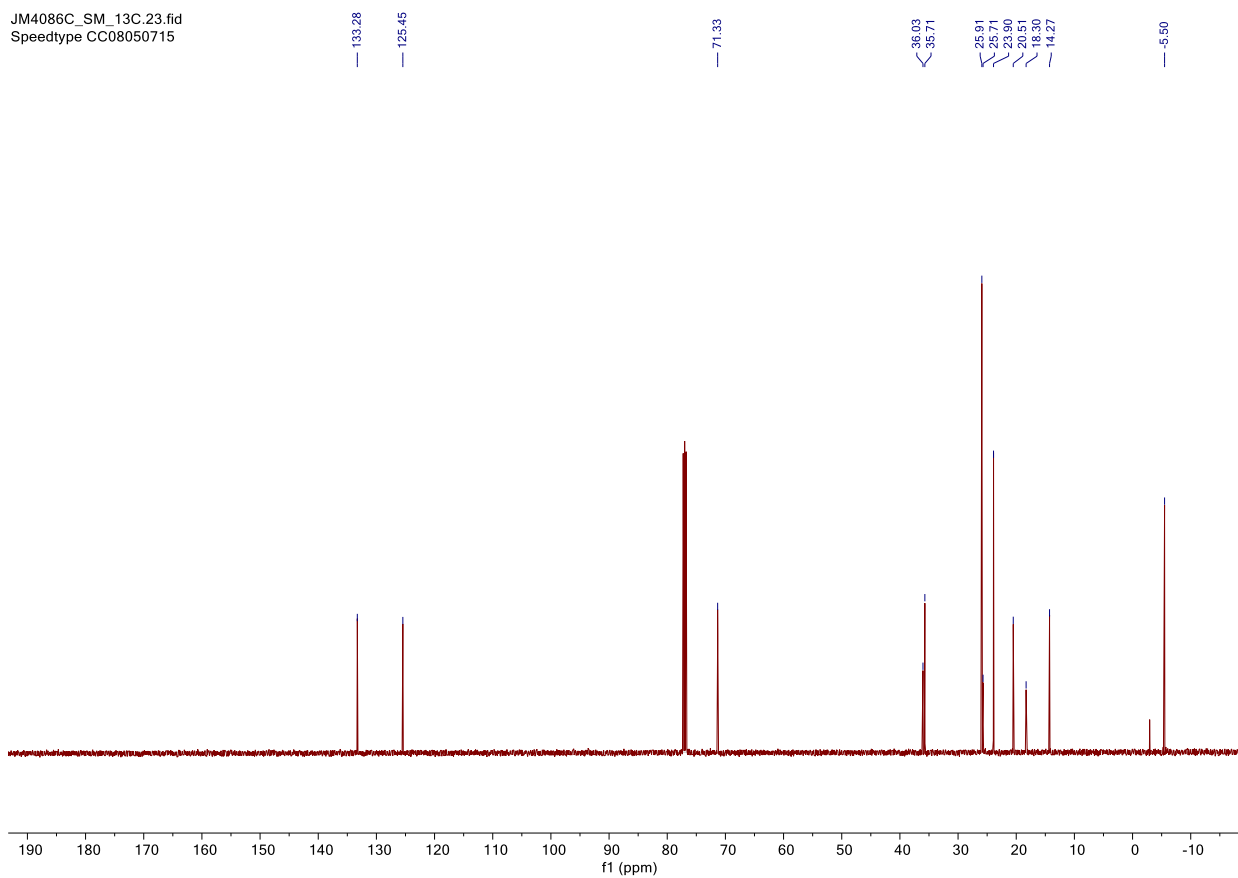



## Compound 1u

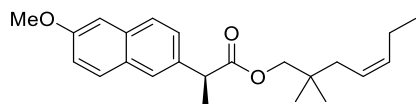

## <sup>1</sup>H NMR

JM4086E\_SM\_1H.22.fid  
Speedtype CC08050715

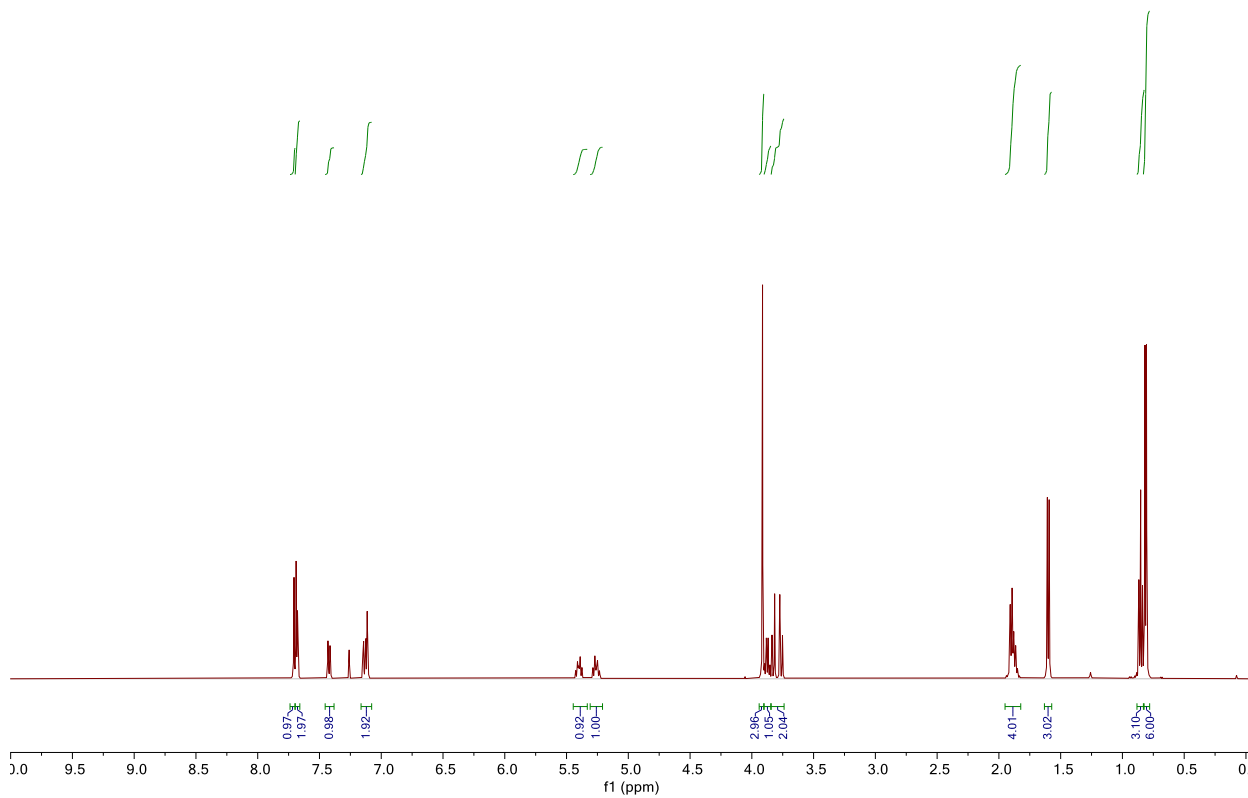

# <sup>13</sup>C NMR

JM4086E\_SM\_13C.23.fid  
Speedtype CC08050715

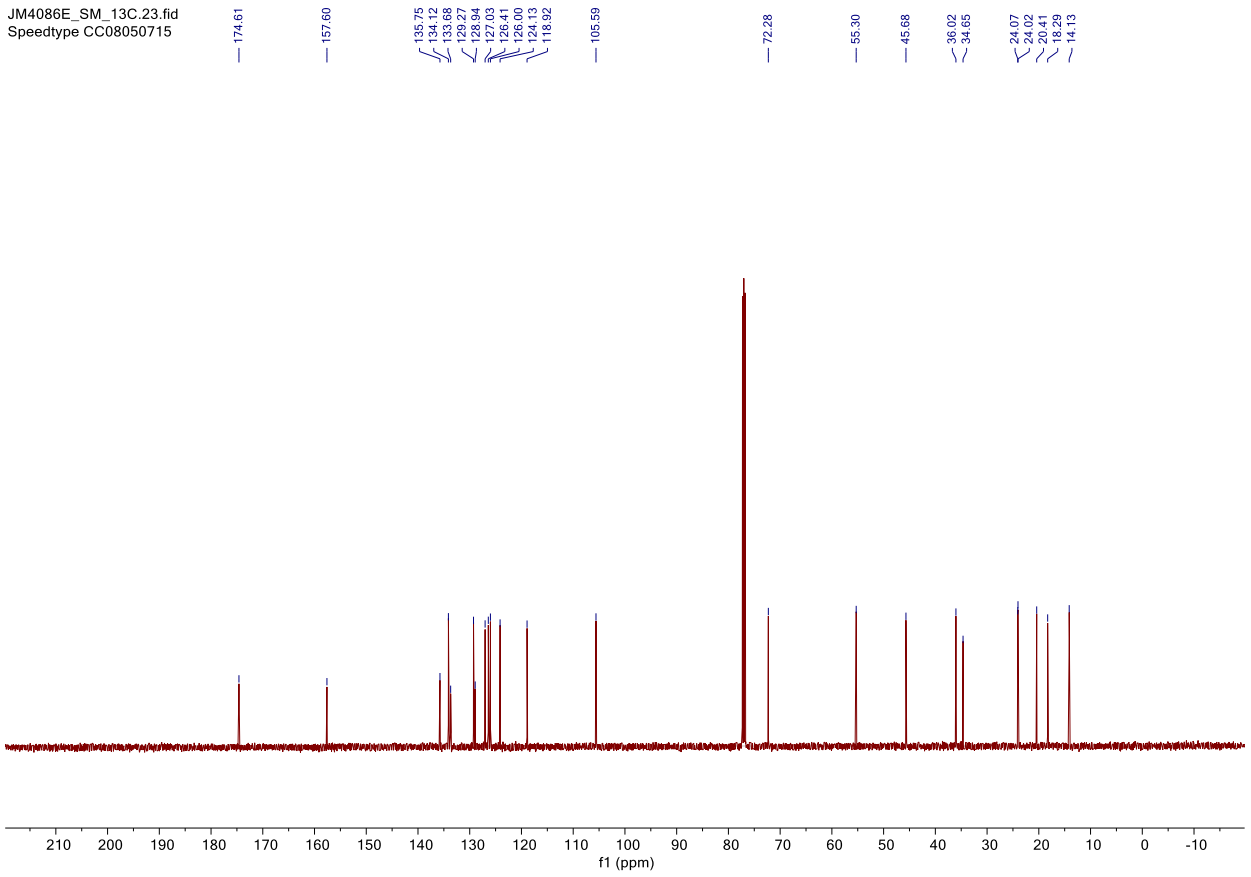

### Compound 1v

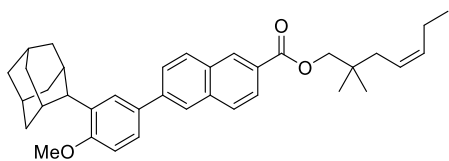

### <sup>1</sup>H NMR

JM4087C\_SM\_1H.22.fid  
Speedtype CC08050715

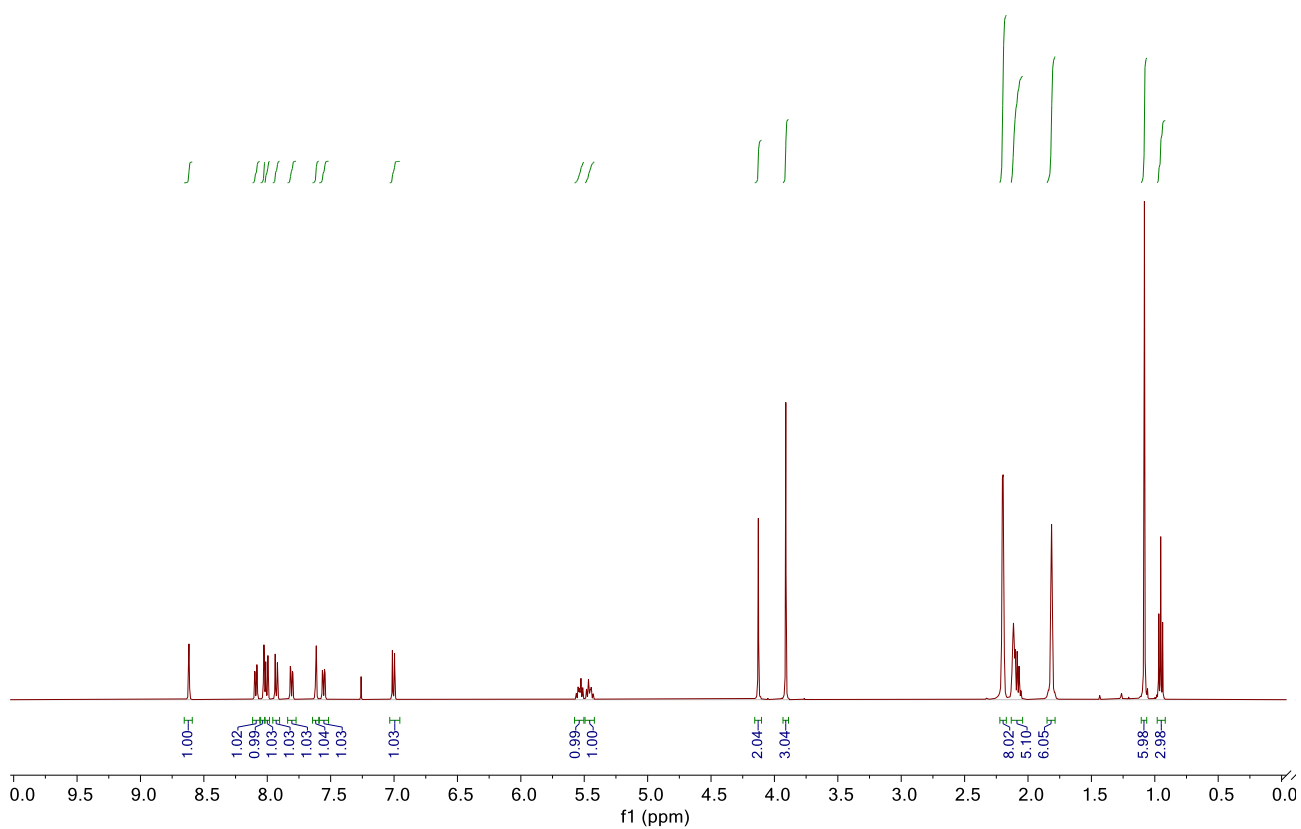

# <sup>13</sup>C NMR

JM4087C\_SM\_13C.23.fid  
Speedtype CC08050715

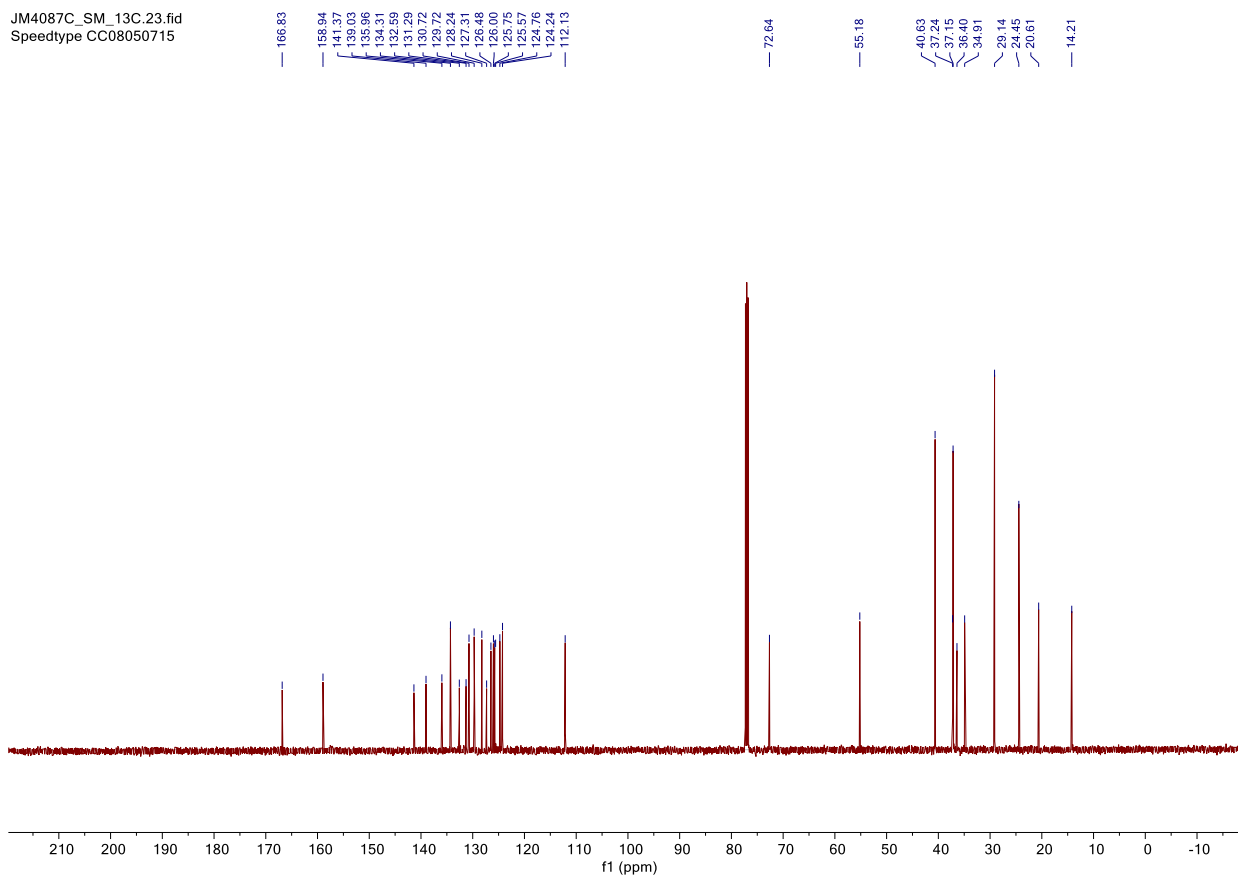

### Compound 1w

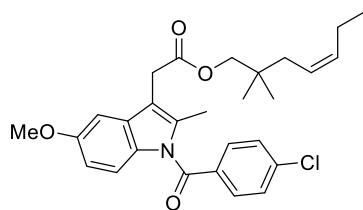

### <sup>1</sup>H NMR

JM4087D\_SM\_1H.22.fid  
Speedtype CC08050715

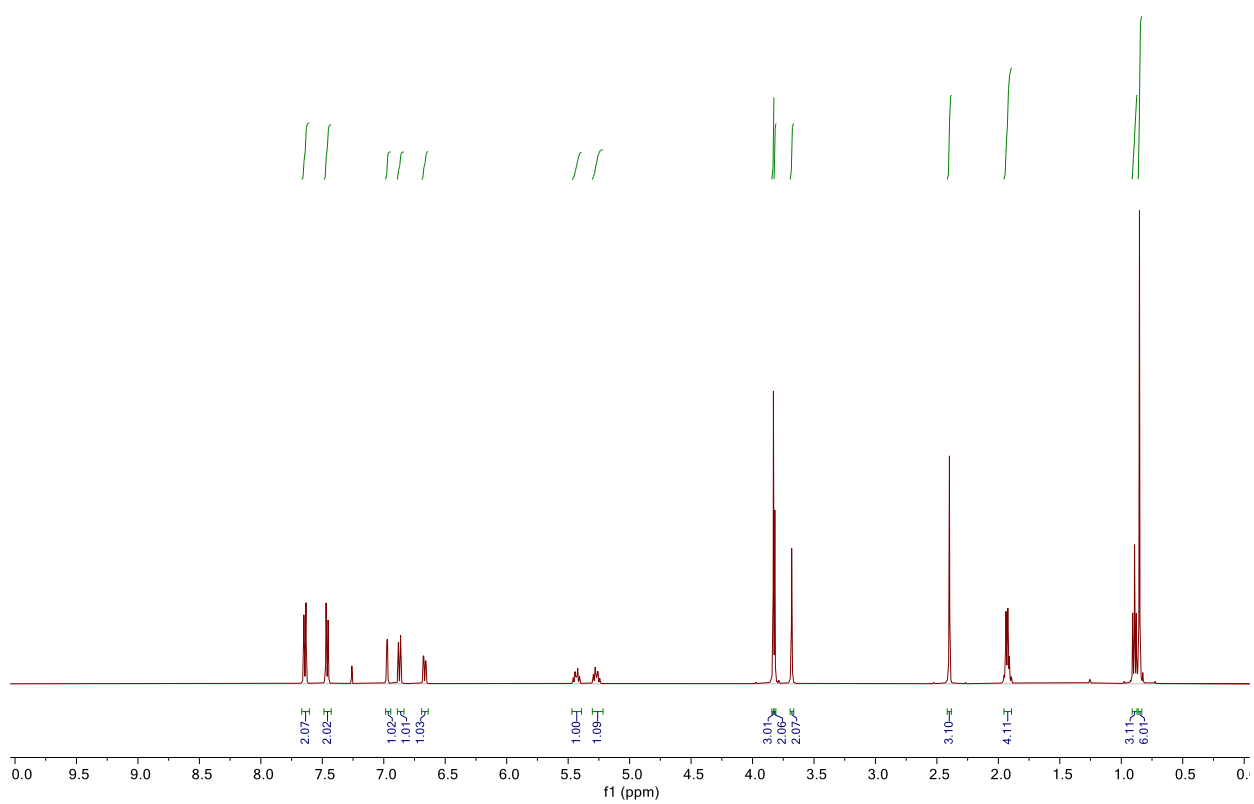

# <sup>13</sup>C NMR

JM4087D\_SM\_13C.23.fid  
Speedtype CC08050715

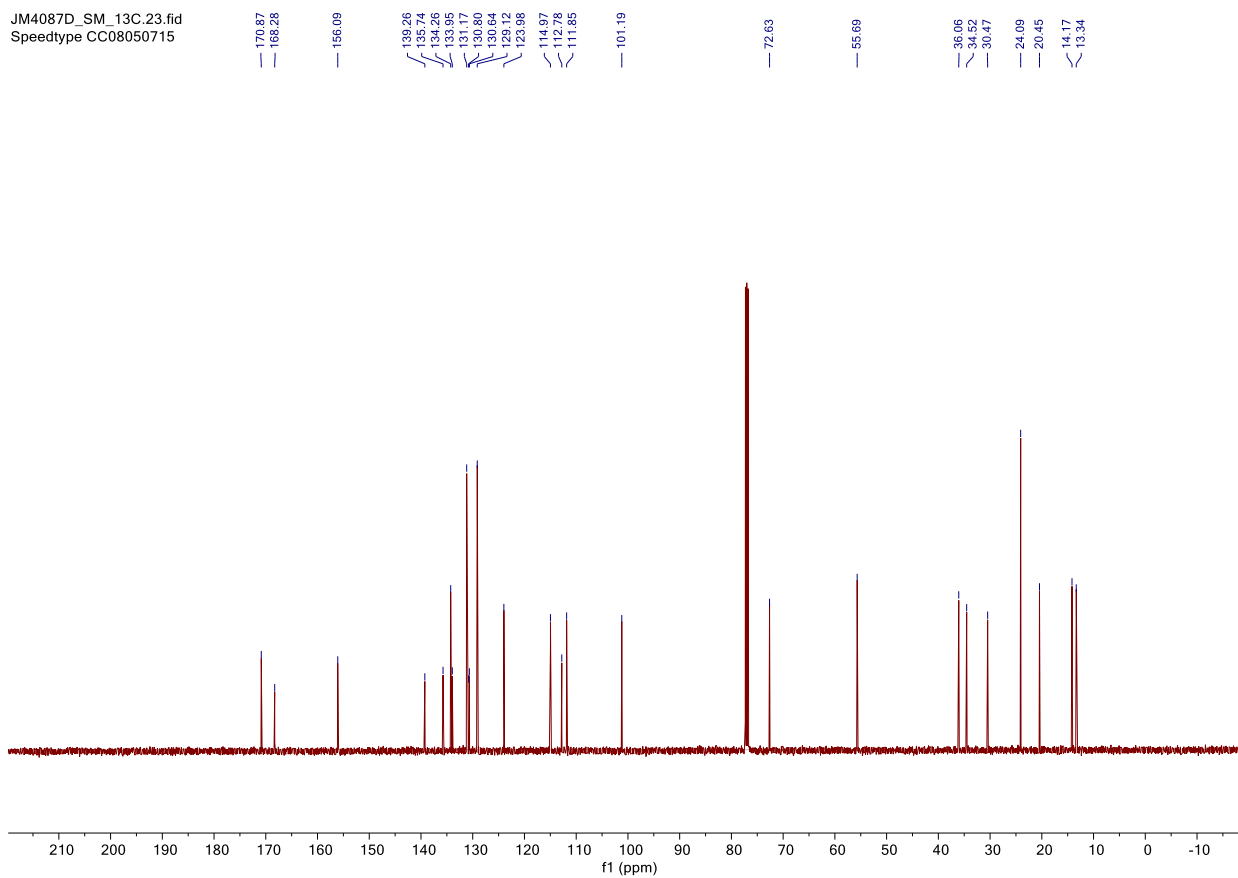

## Compound 1x

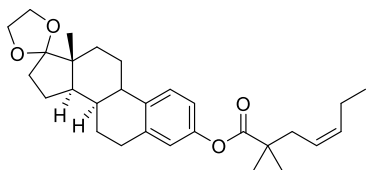

## <sup>1</sup>H NMR

JM4074E\_SM\_1H.13.fid  
Speedtype CC08050715

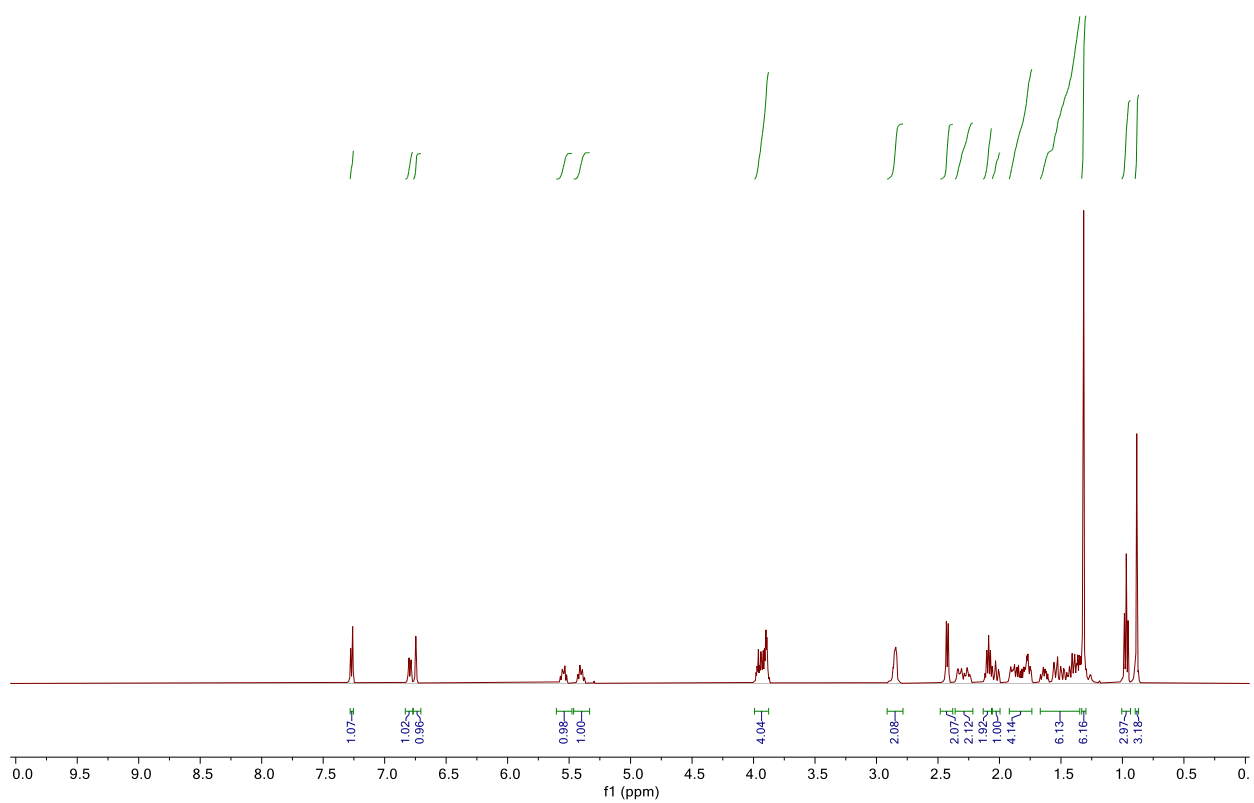

# <sup>13</sup>C NMR

JM4074E\_SM\_13C.1#.fid  
Speedtype CC08050715

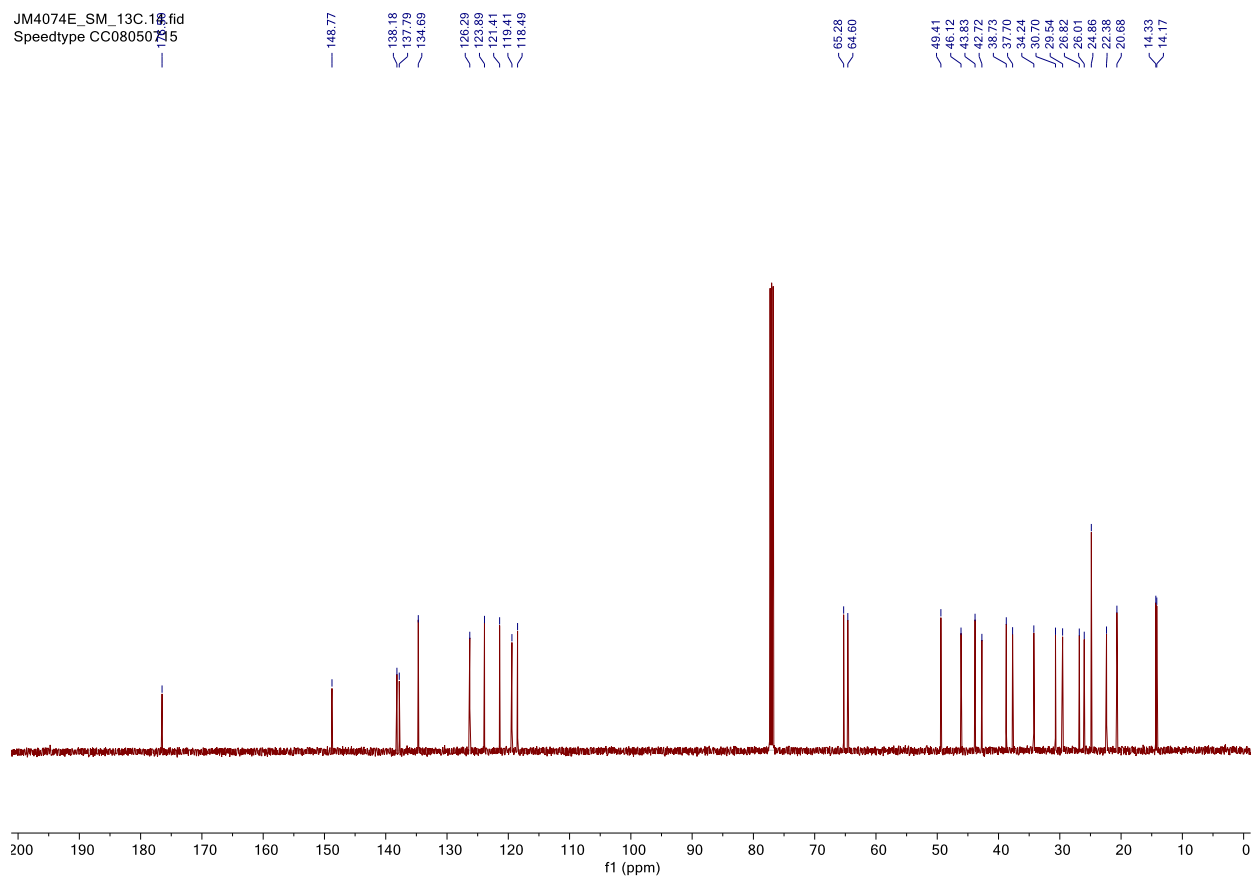



[Return to table of contents]

## Compound 2g-NHBoc

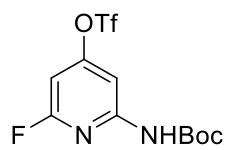

## <sup>1</sup>H NMR

JM4215\_prod\_1H.6.fid

<sup>13</sup>C{<sup>1</sup>H} starting parameters - HC 06/17/2019

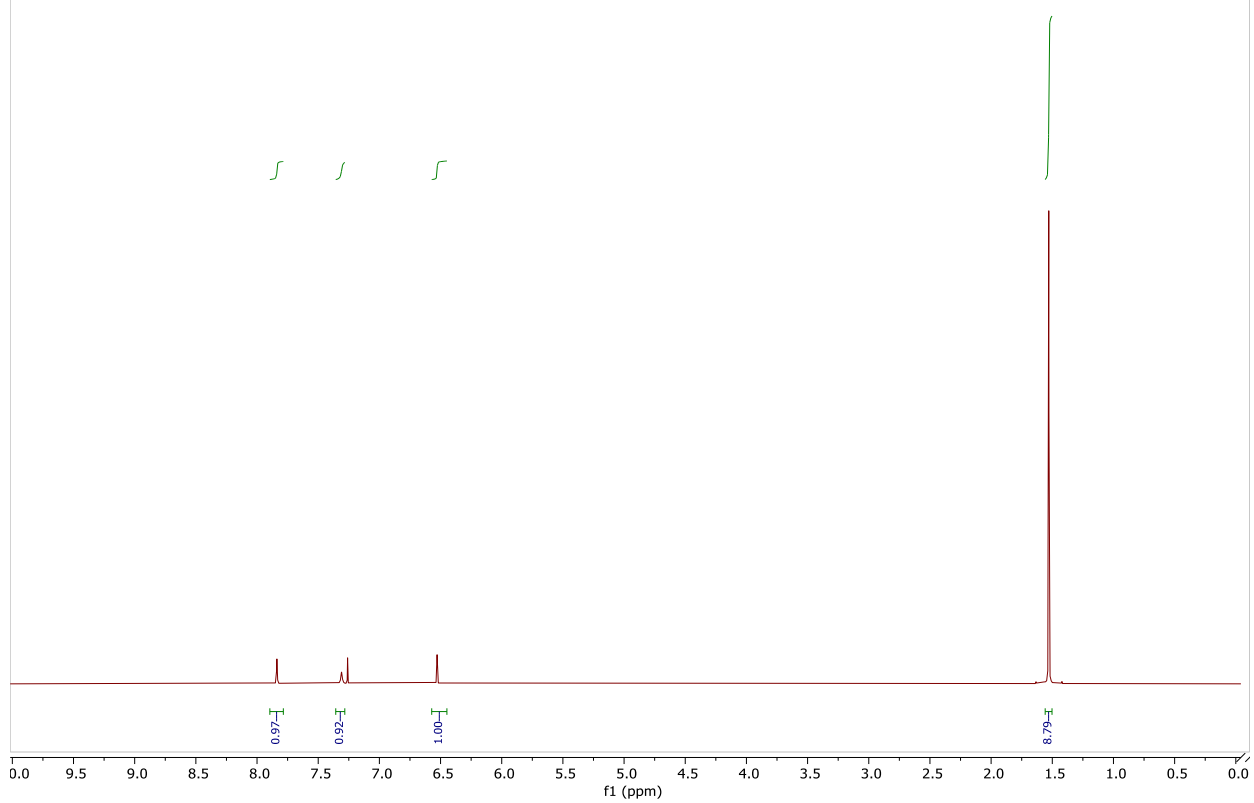

# <sup>13</sup>C NMR

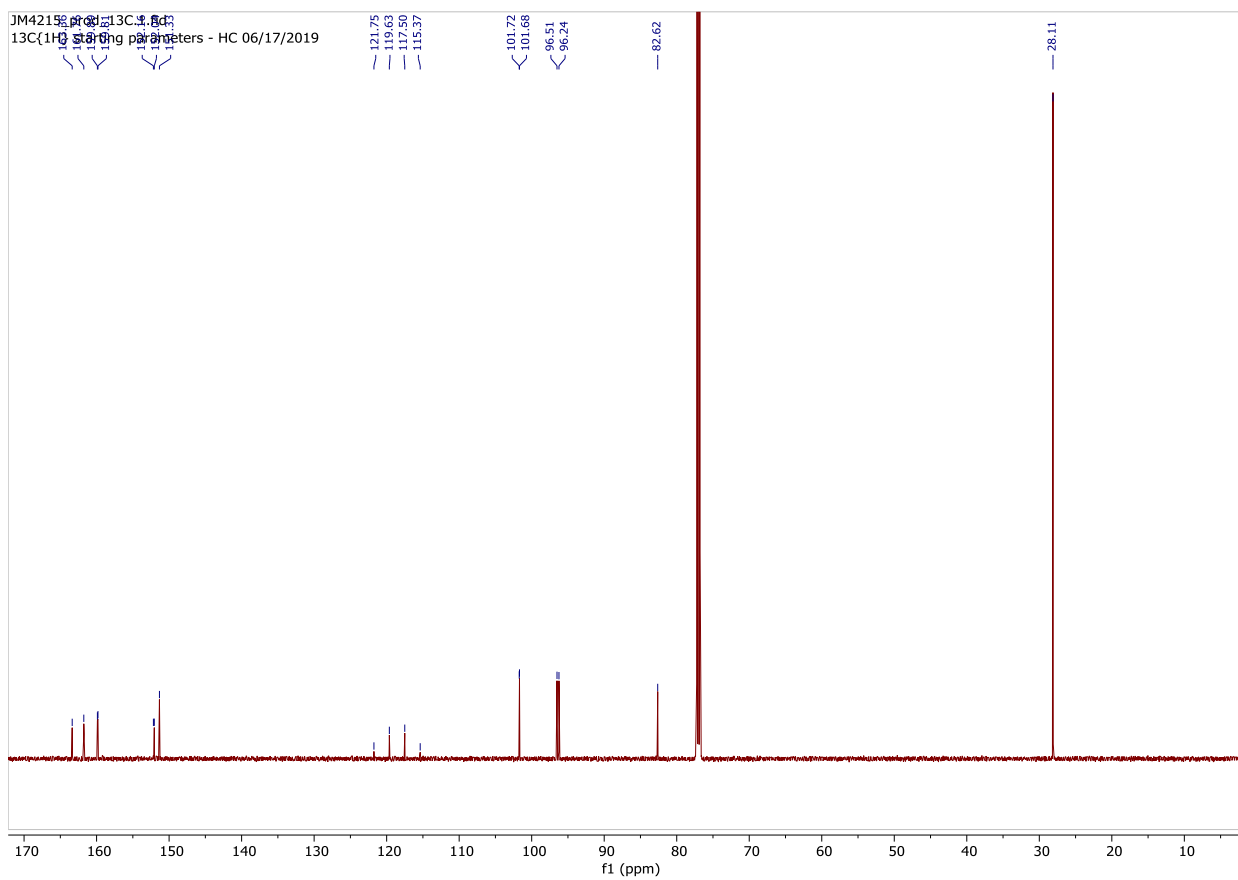

## Compound 2g

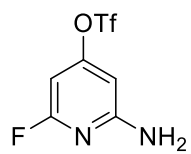

## <sup>1</sup>H NMR

JM4234D\_sm\_1H.3.fid  
13C{1H} starting parameters - HC 06/17/2019

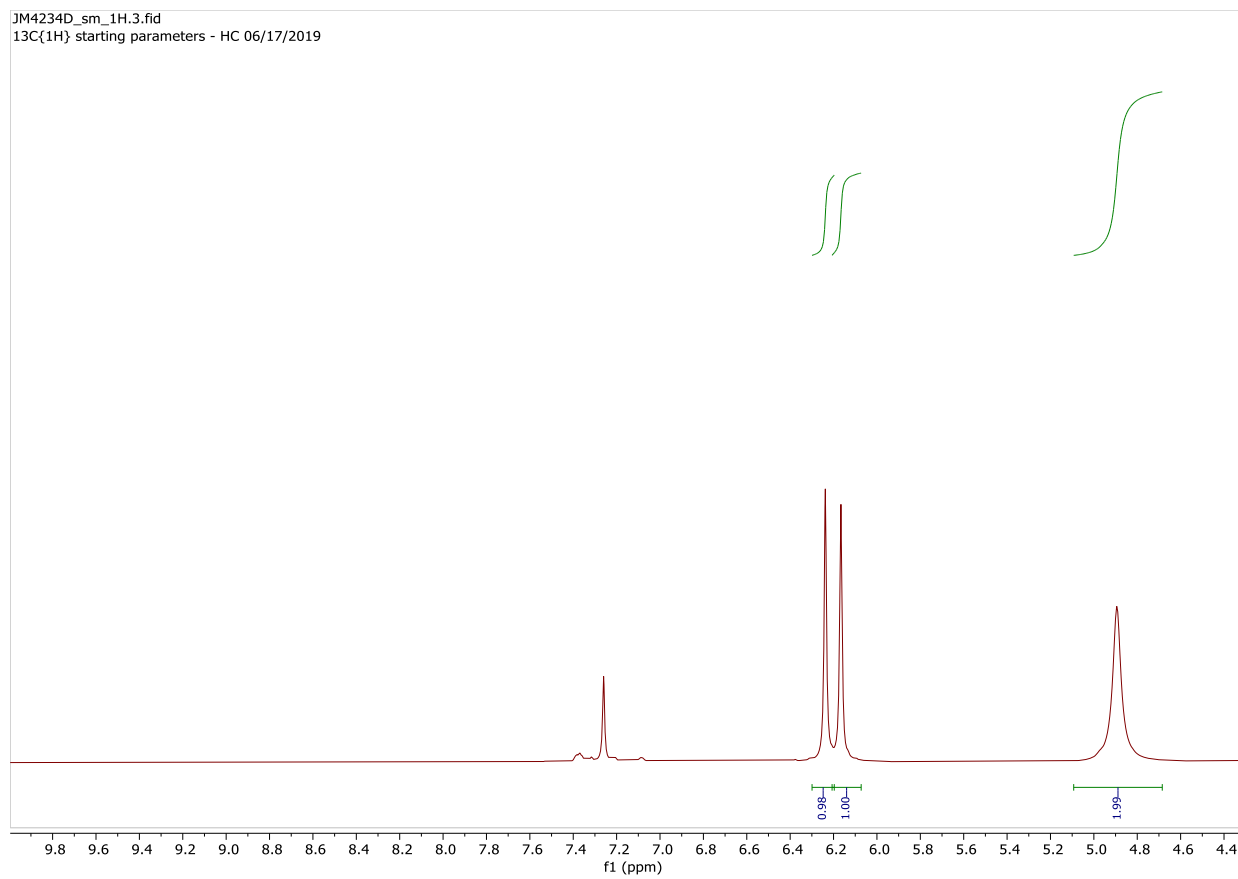

# <sup>13</sup>C NMR

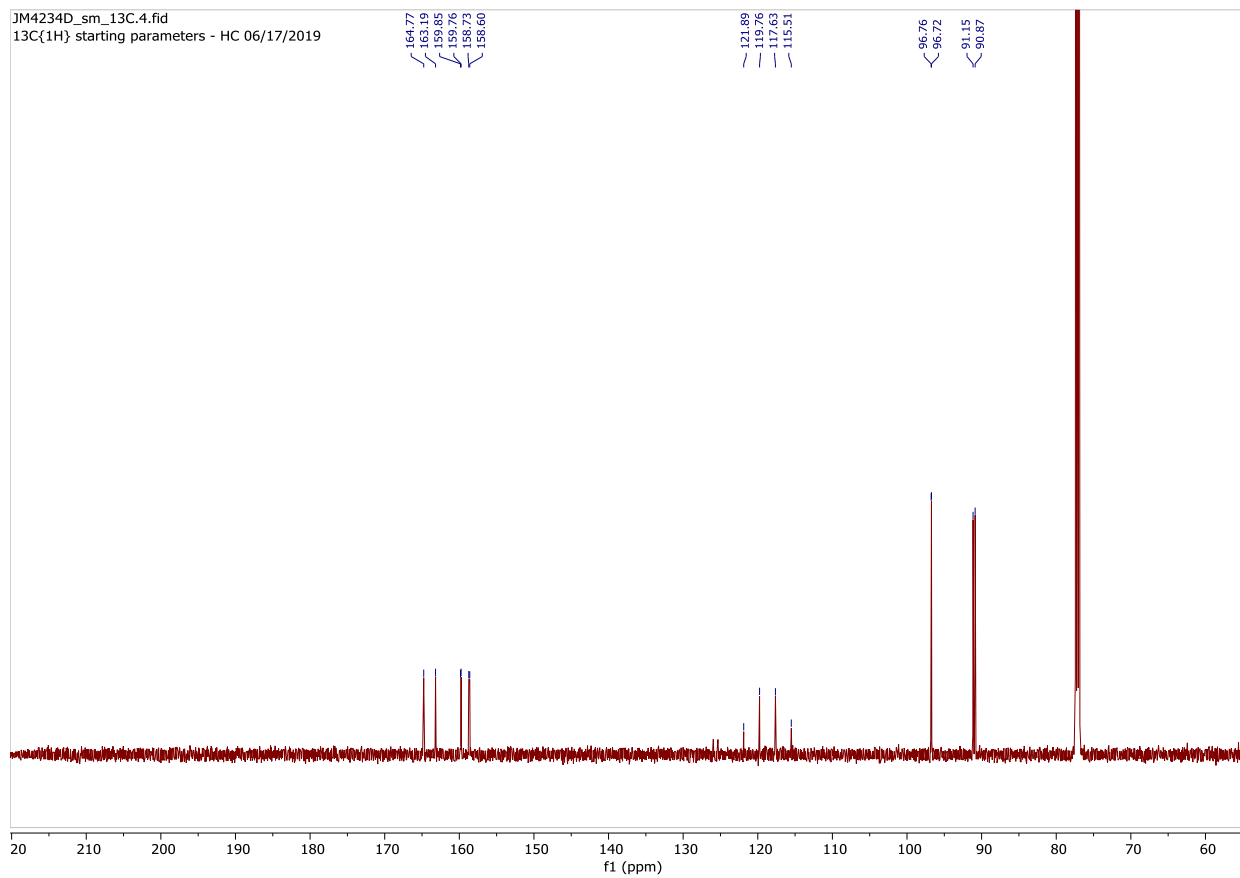

## Compound 2i

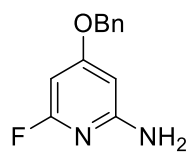

## <sup>1</sup>H NMR

JM4234G\_sm\_1H.4.fid  
13C{1H} starting parameters - HC 06/17/2019

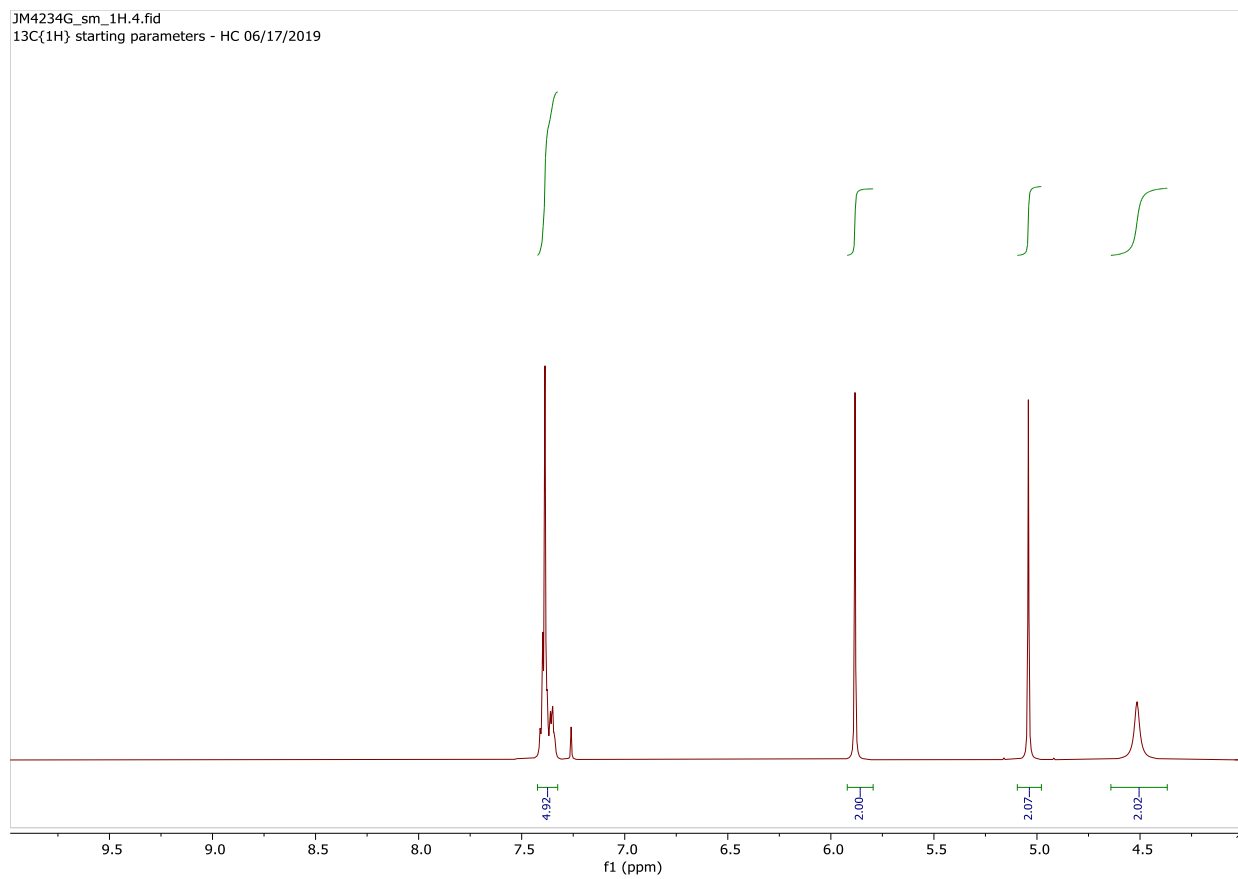

# <sup>13</sup>C NMR

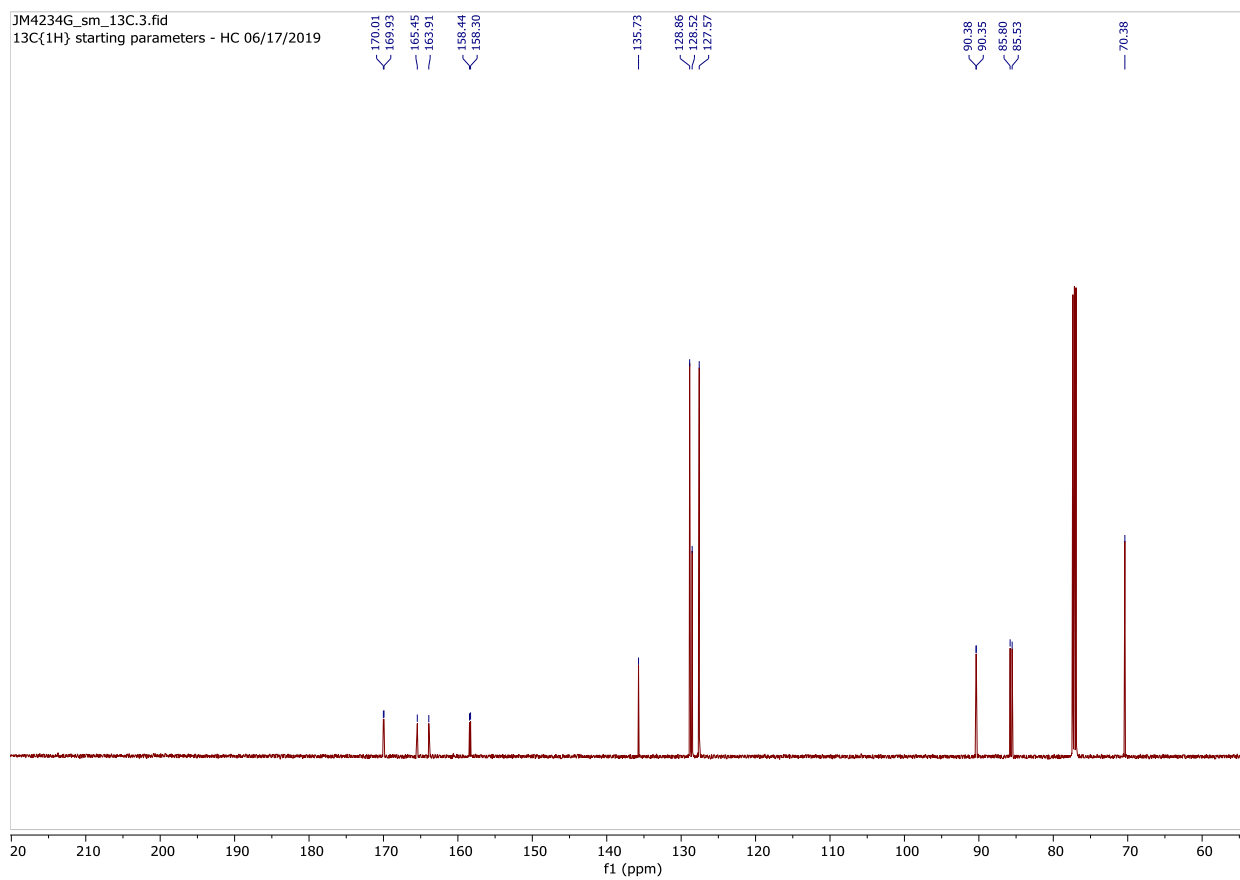

## Compound 2j

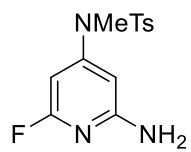

## <sup>1</sup>H NMR

JM4245H\_sm\_1H.5.fid  
13C{1H} starting parameters - HC 06/17/2019

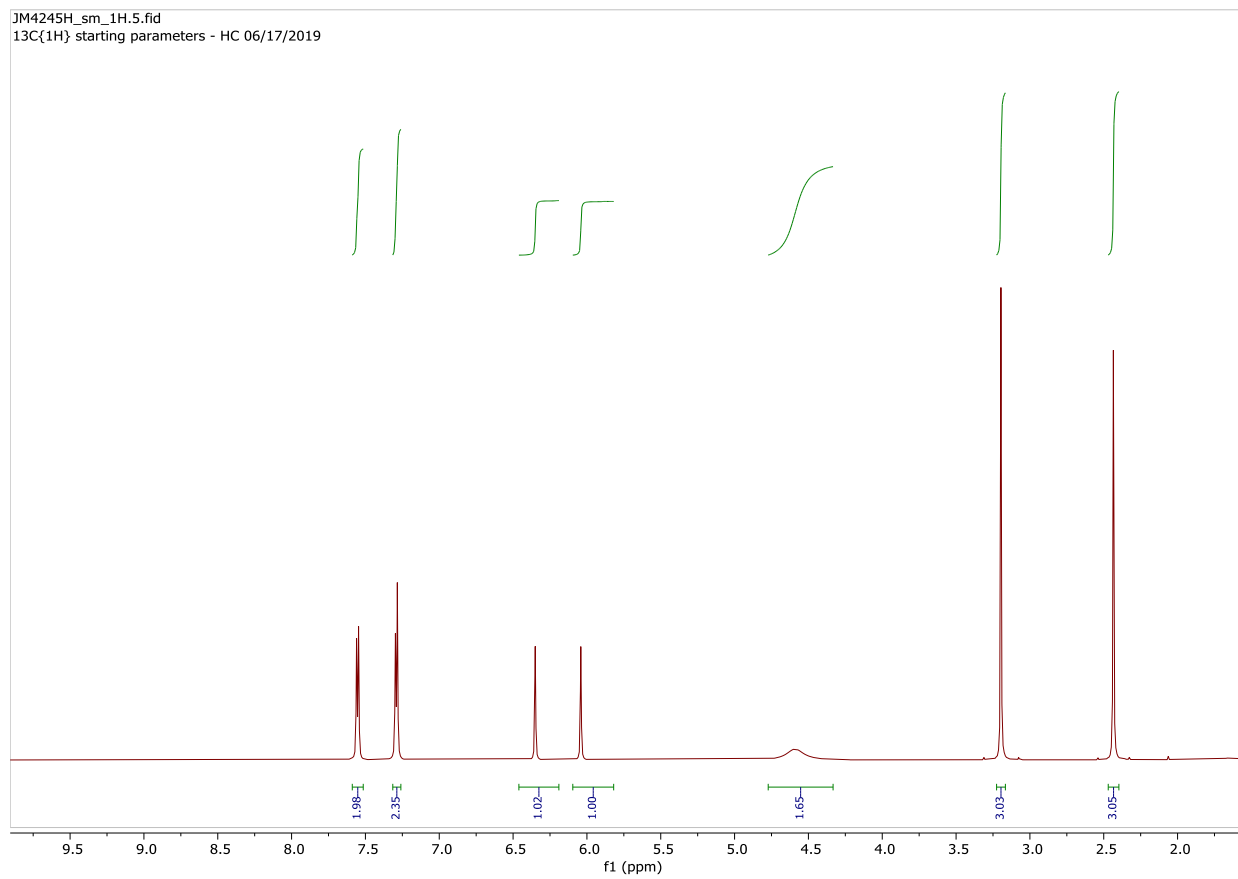

# <sup>13</sup>C NMR

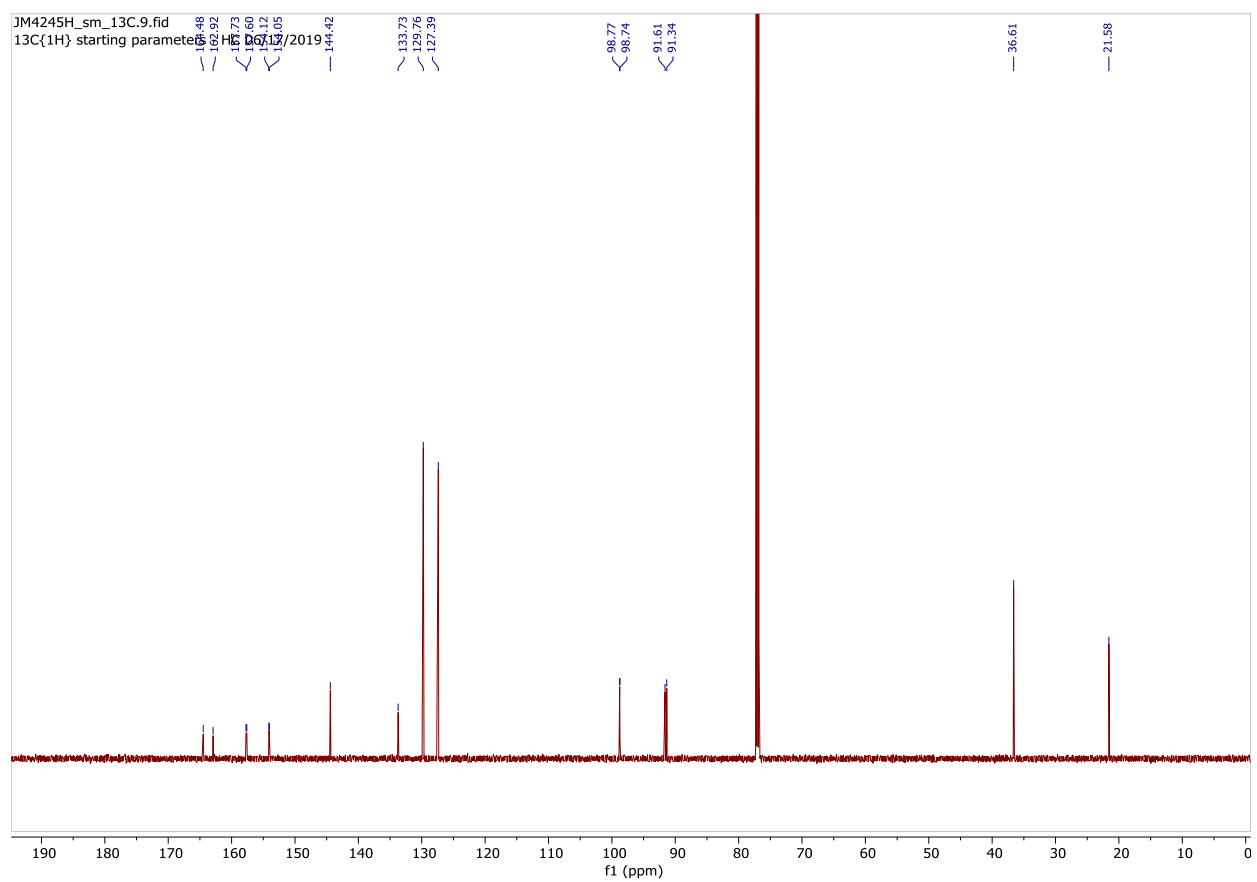



## Compound 2o

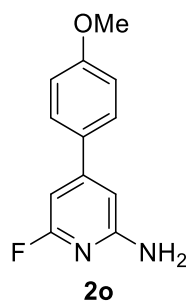

## <sup>1</sup>H NMR

JM4245C\_sm\_1H.1.fid  
13C{1H} starting parameters - HC 06/17/2019

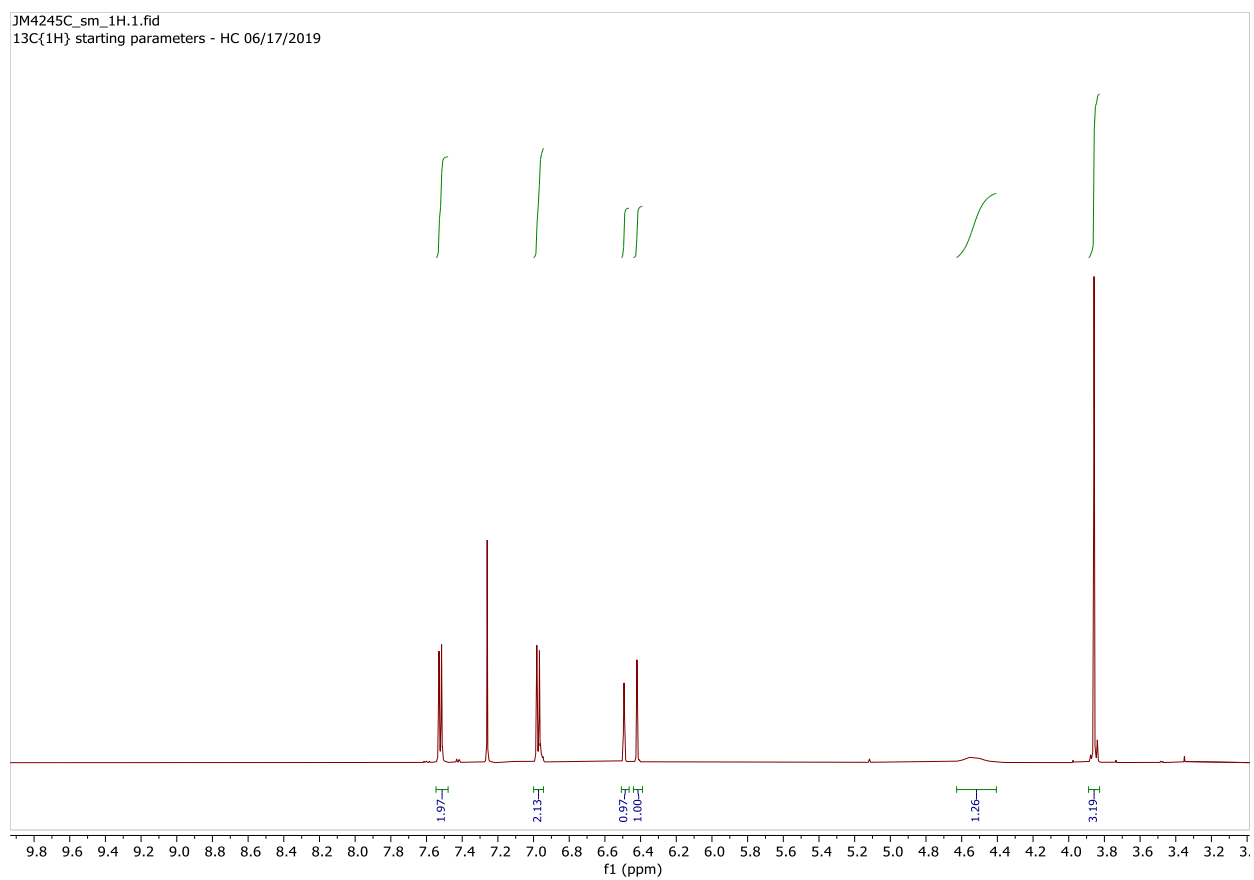

# <sup>13</sup>C NMR

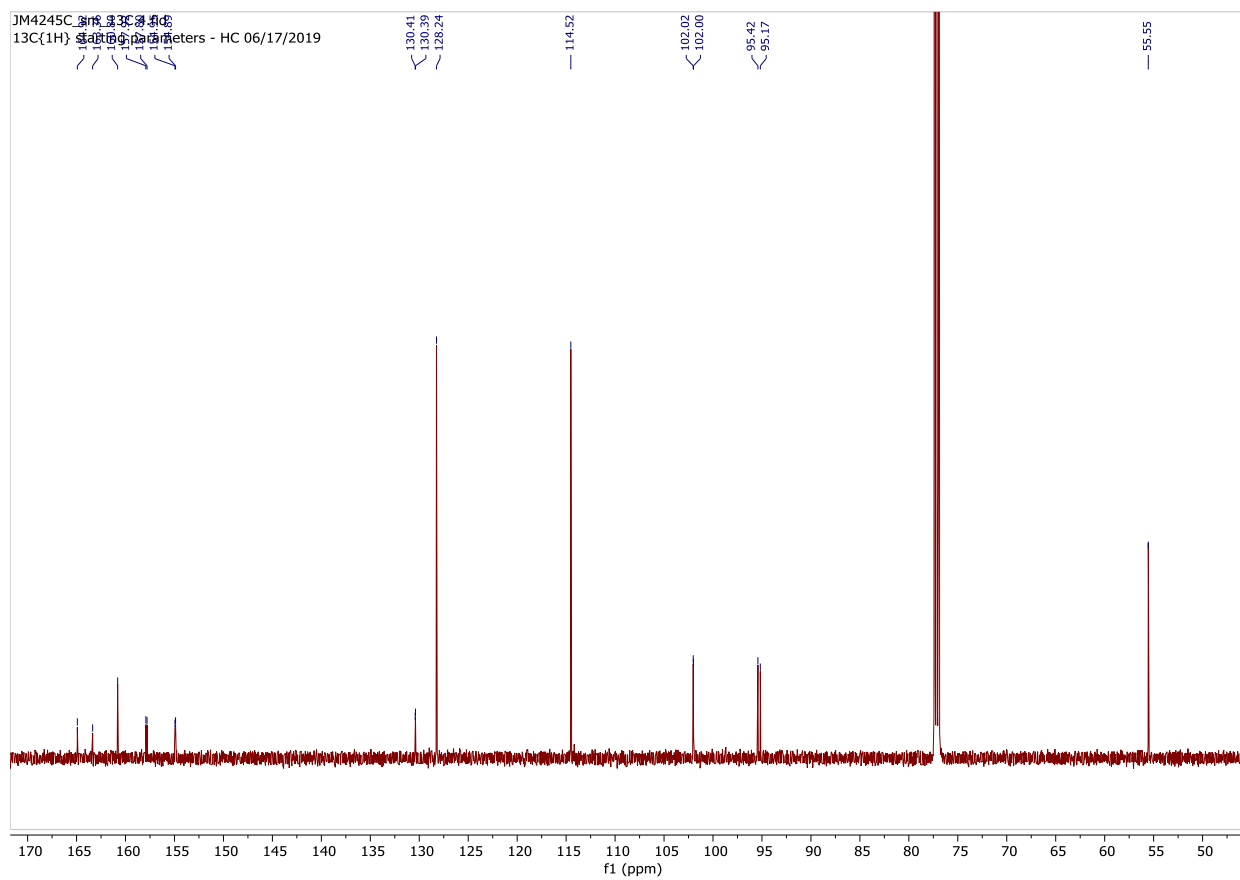

## Compound 2p

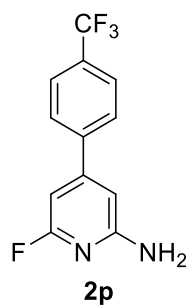

## <sup>1</sup>H NMR

JM4245E\_sm\_1H.3.fid  
13C{1H} starting parameters - HC 06/17/2019

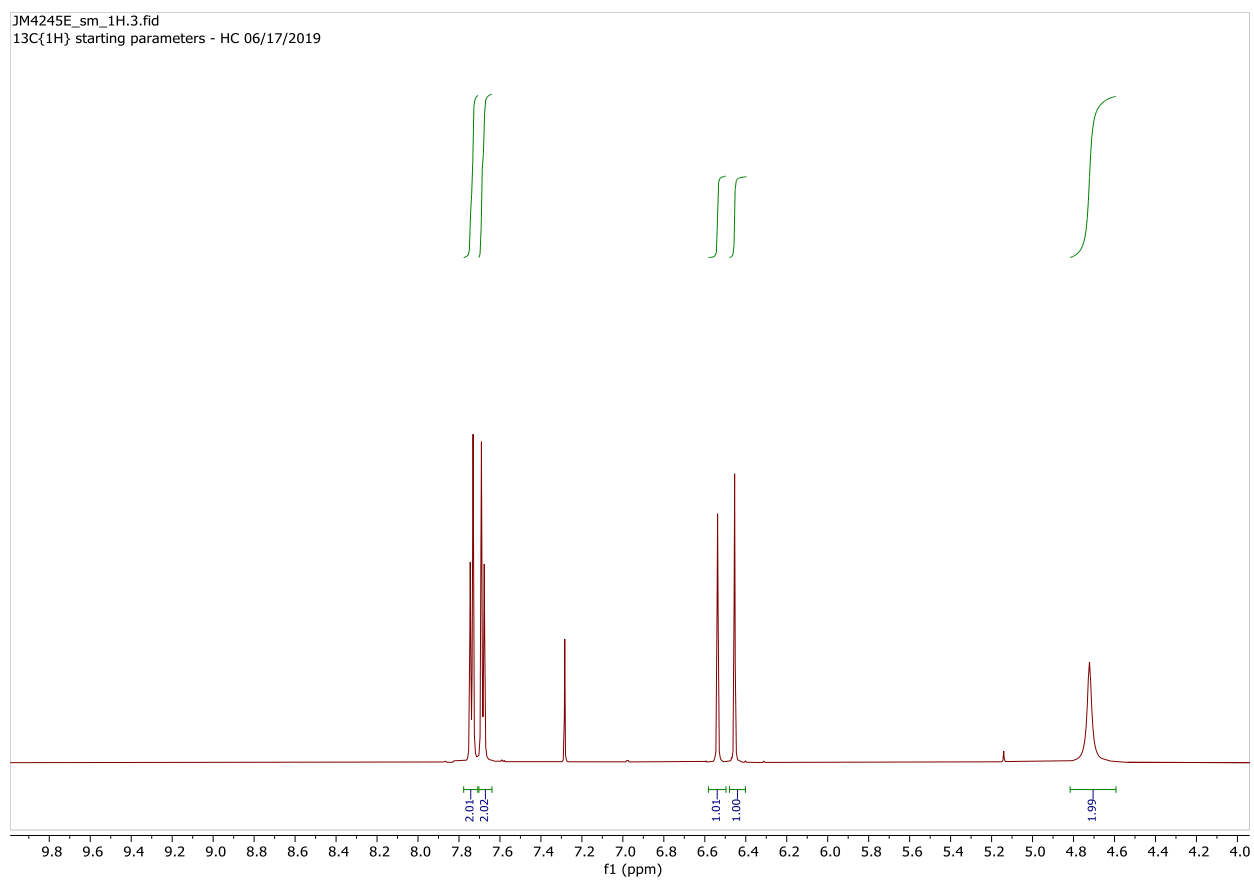

**<sup>13</sup>C NMR**

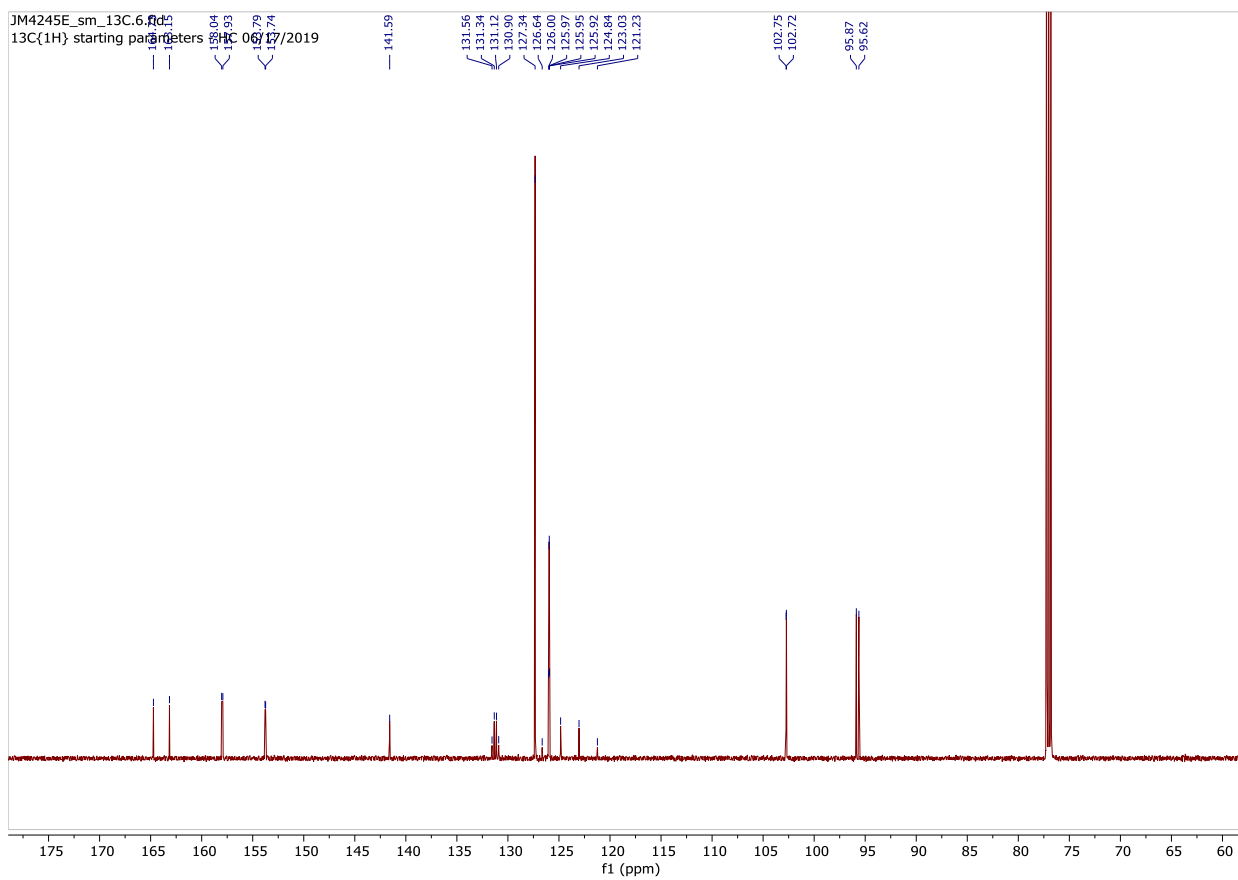

## Compound 2r

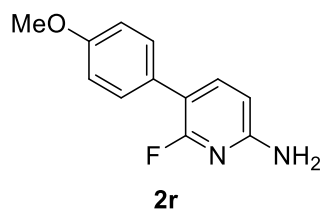

## <sup>1</sup>H NMR

JM4245D\_sm\_1H.2.fid  
13C{1H} starting parameters - HC 06/17/2019

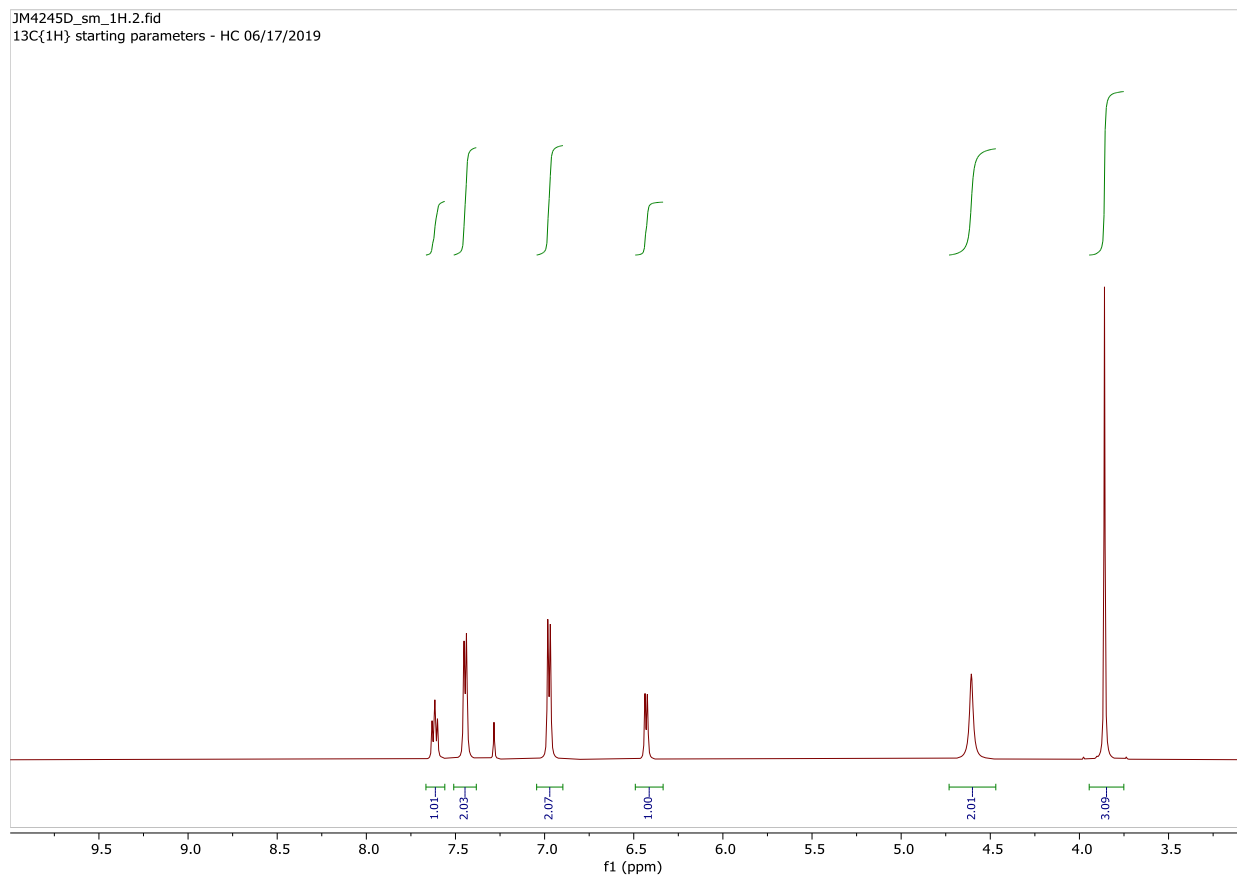

# <sup>13</sup>C NMR

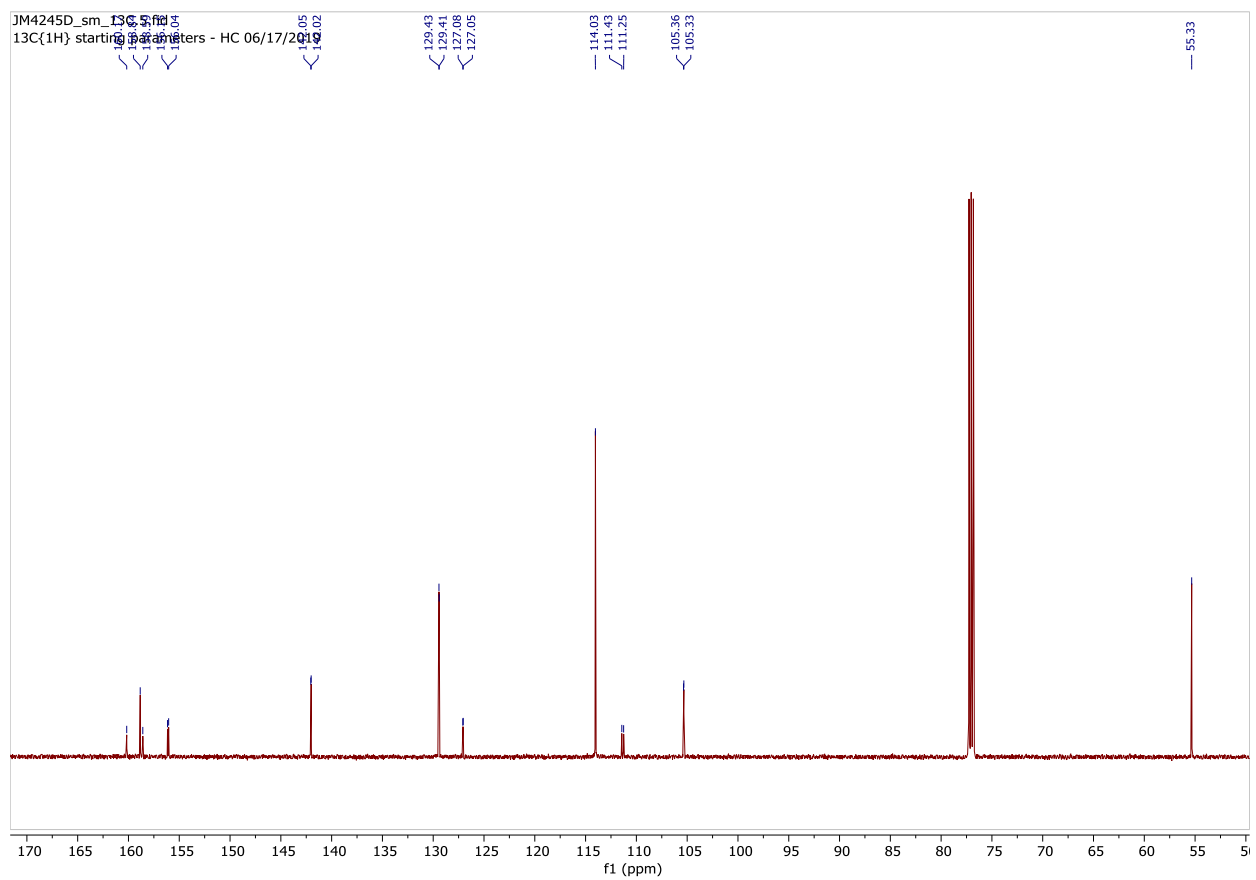

## Compound 2s

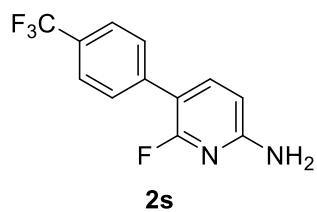

## <sup>1</sup>H NMR

JM4245F\_sm\_1H.4.fid  
13C{1H} starting parameters - HC 06/17/2019

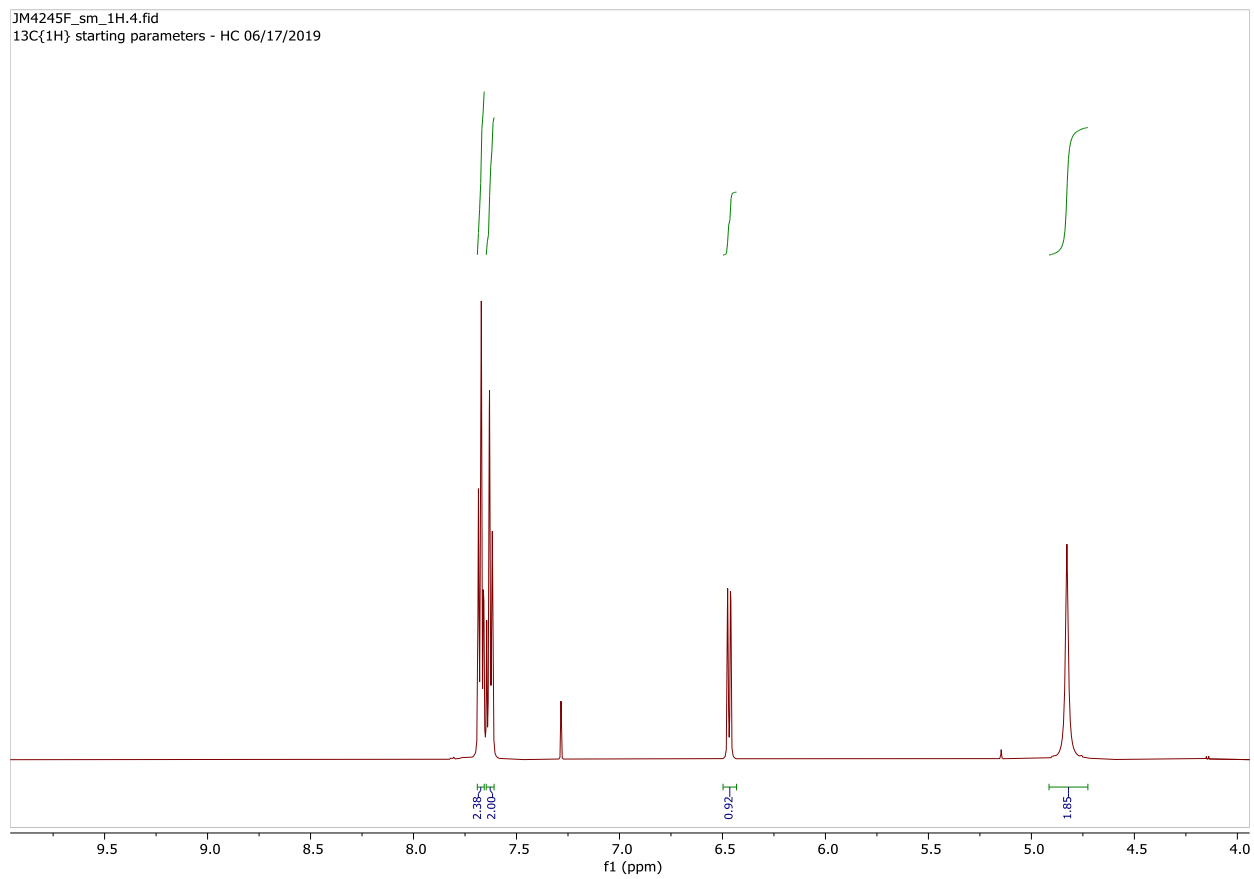

# <sup>13</sup>C NMR

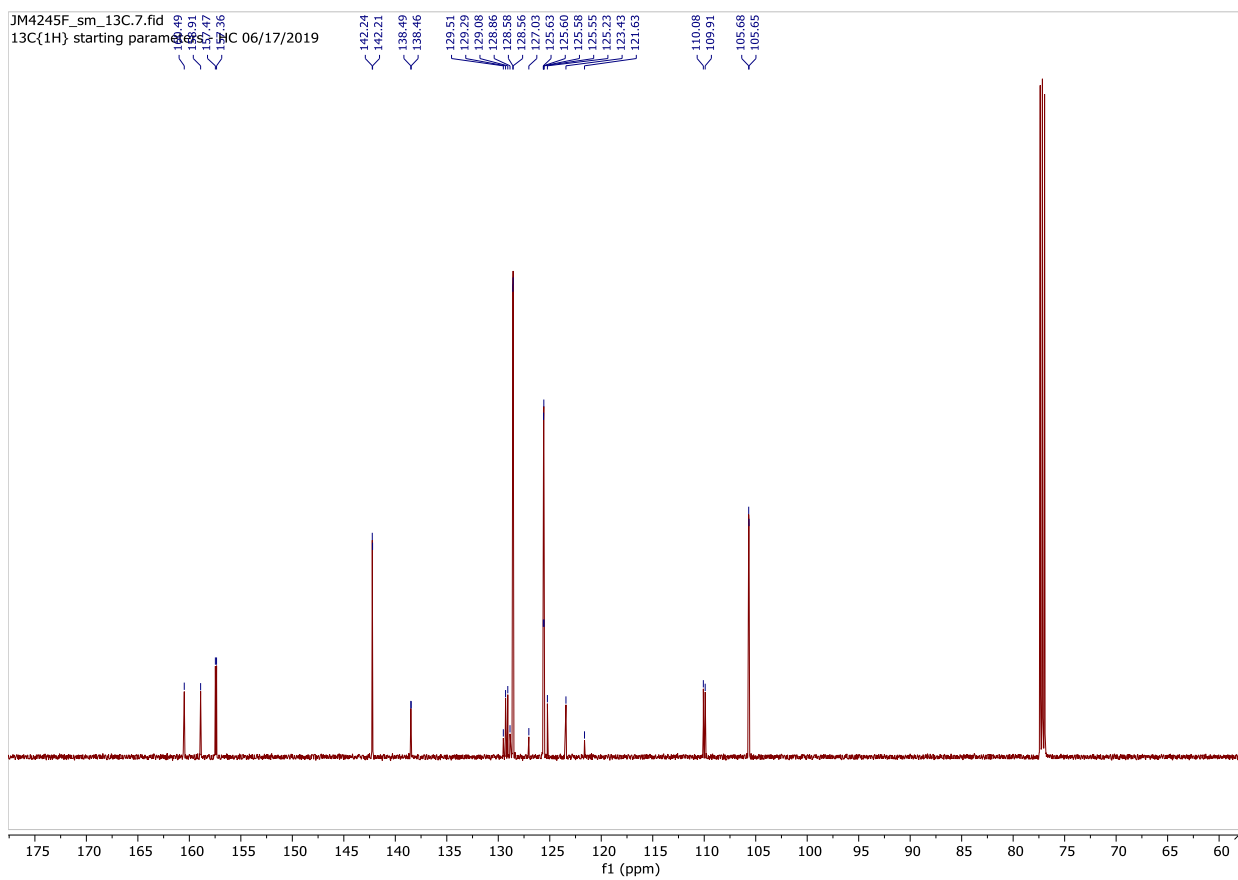



## Compound 2q

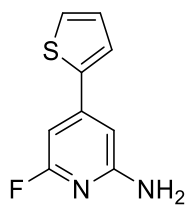

## <sup>1</sup>H NMR

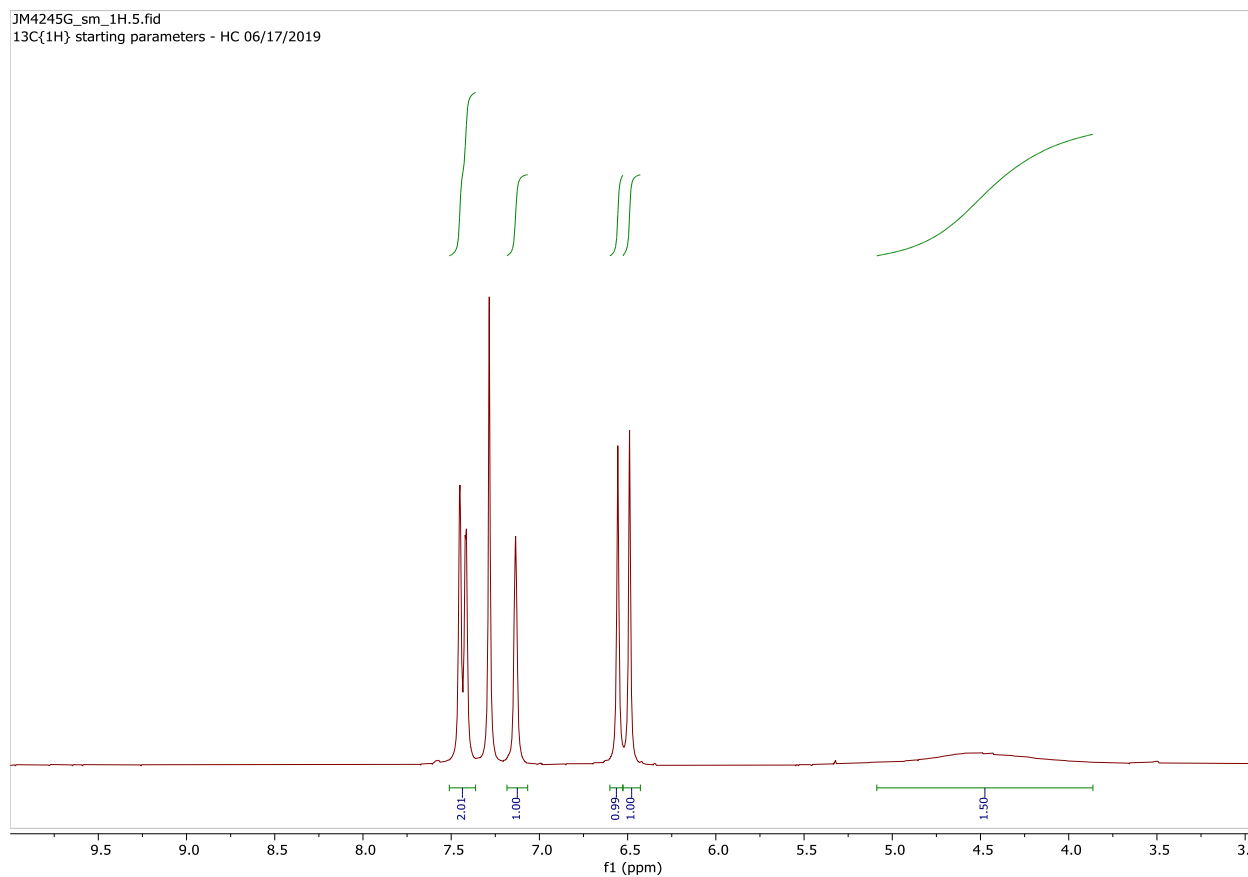

# <sup>13</sup>C NMR

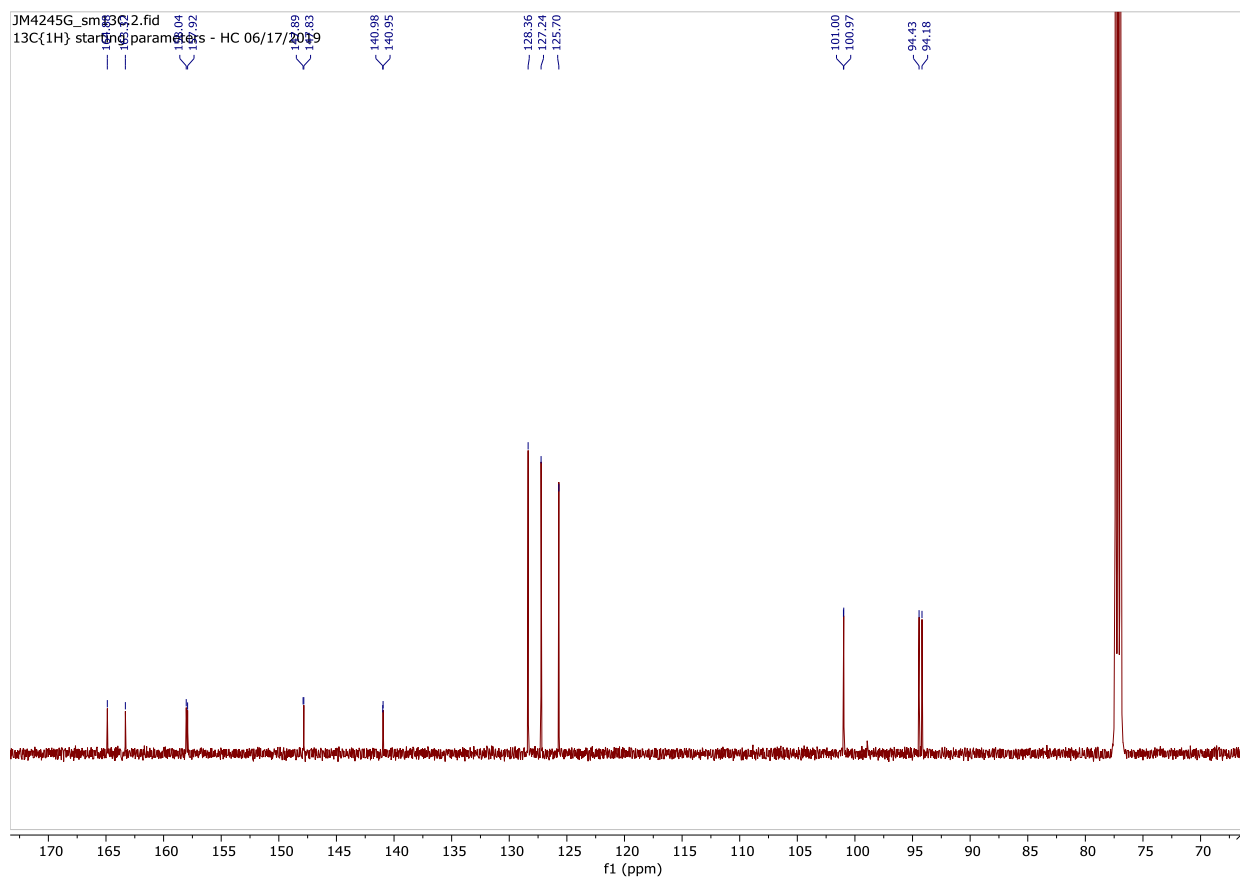

## Ad-SEGPPOS-POCl<sub>2</sub>

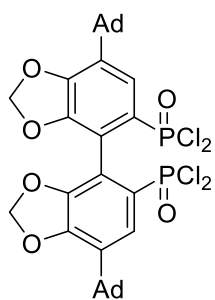

## <sup>1</sup>H NMR

JM4062\_POCl2\_1H.1.fid  
13C{<sup>1</sup>H} starting parameters - HC 06/17/2019

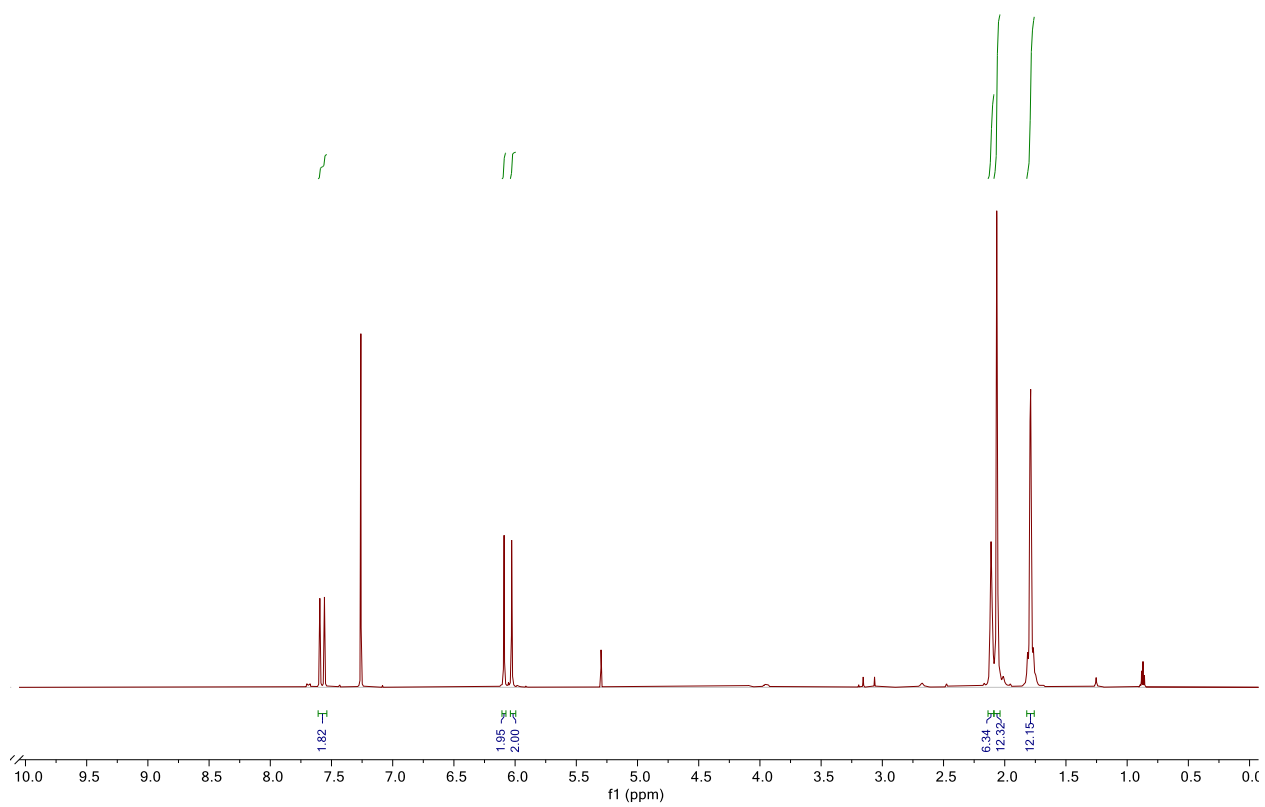

[Return to table of contents]

### <sup>31</sup>P NMR

JM4062\_POCl2\_31P.2.fid  
13C{1H} starting parameters - HC 06/17/2019

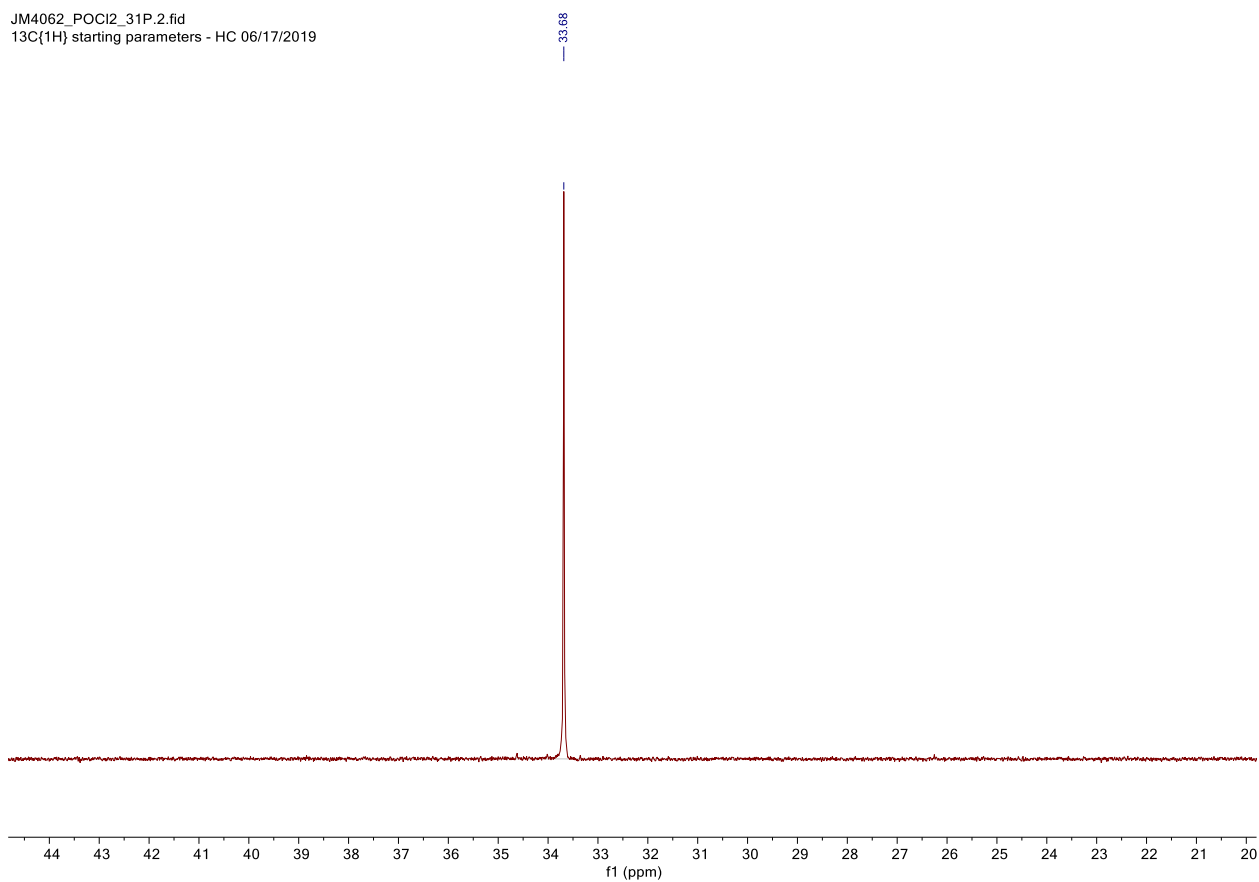

## Ad-SEGPPOS-POAr<sub>2</sub>

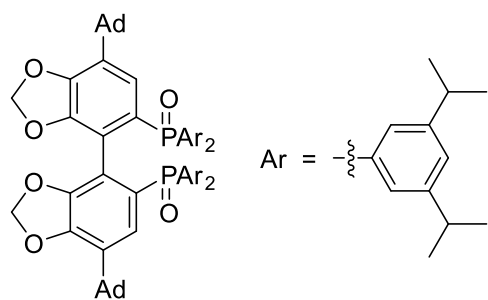

## <sup>1</sup>H NMR

JM4062\_POAr2\_1H.13.fid  
Speedtype CC08050490  
1h.cocnmr.av600 CDCl<sub>3</sub> /opt/nmrdata/u/ senjiema 7

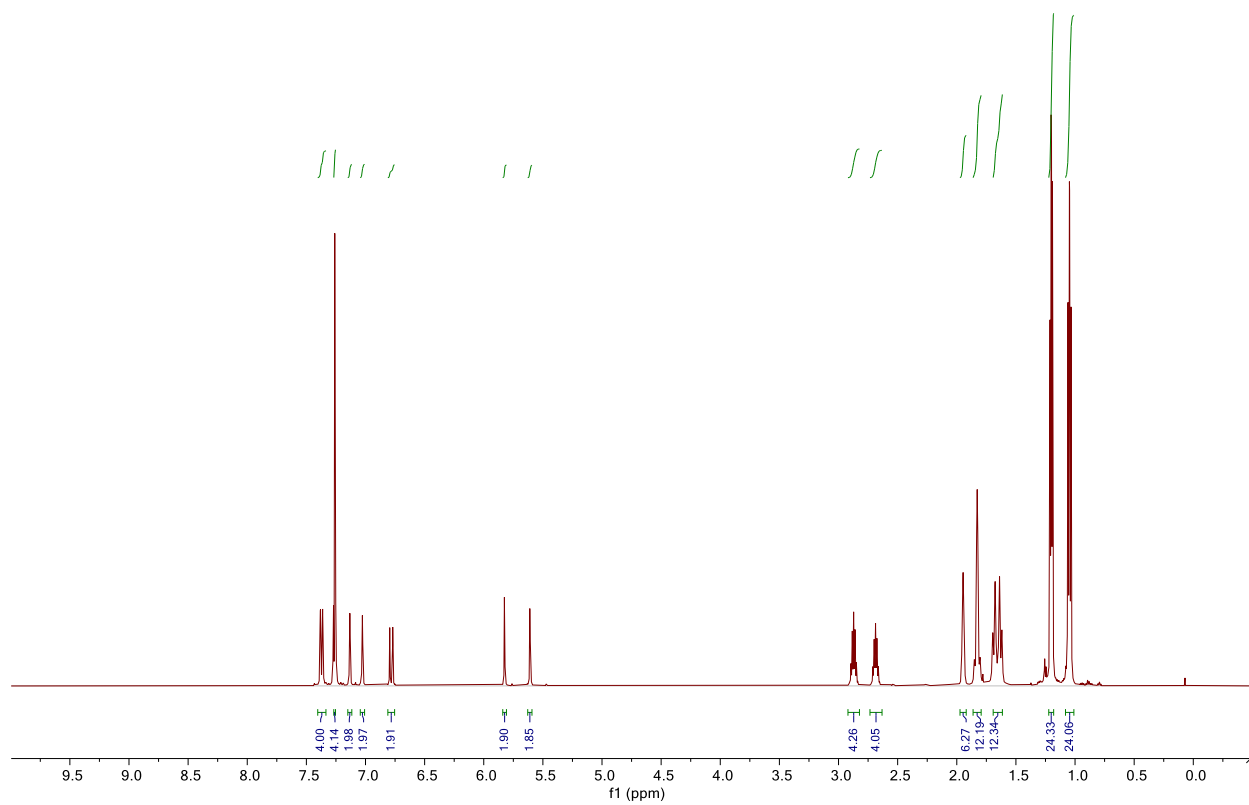

[Return to table of contents]

### <sup>31</sup>P NMR

JM4062\_POAr2\_31P.16.fid  
Speedtype CC08050490  
31p.cocnmr.av600 CDCl3 /opt/nmrdata/u/ senjiema 7

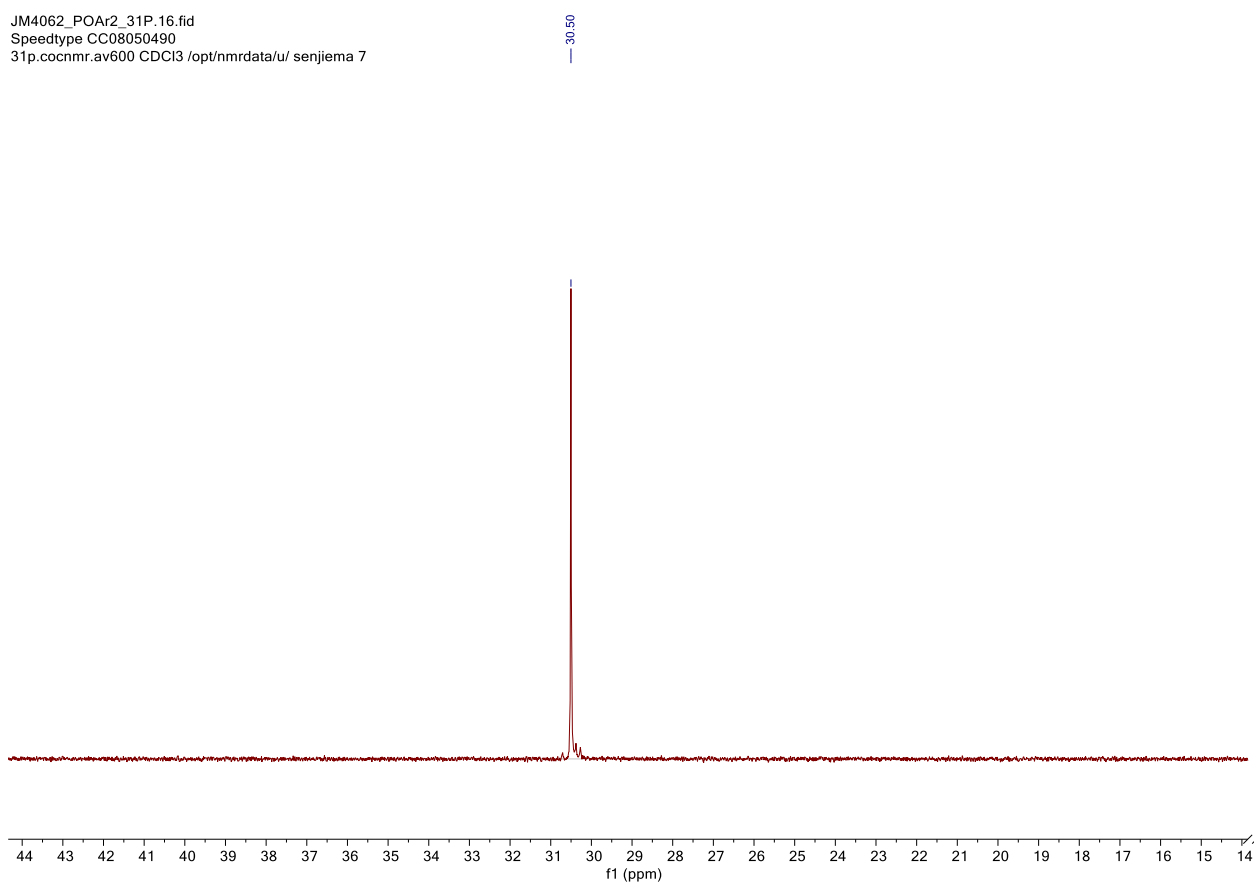

## DIP-Ad-SEGPPOS (Ad-SEGPPOS-PAr<sub>2</sub>)

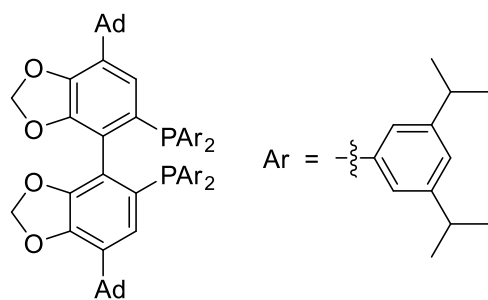

## <sup>1</sup>H NMR

JM4062\_PAr2\_1H.1.fid  
Speedtype CC08050490  
1h.cocnmr.av600 CDCl<sub>3</sub> /opt/nmrdata/u/ senjiema 6

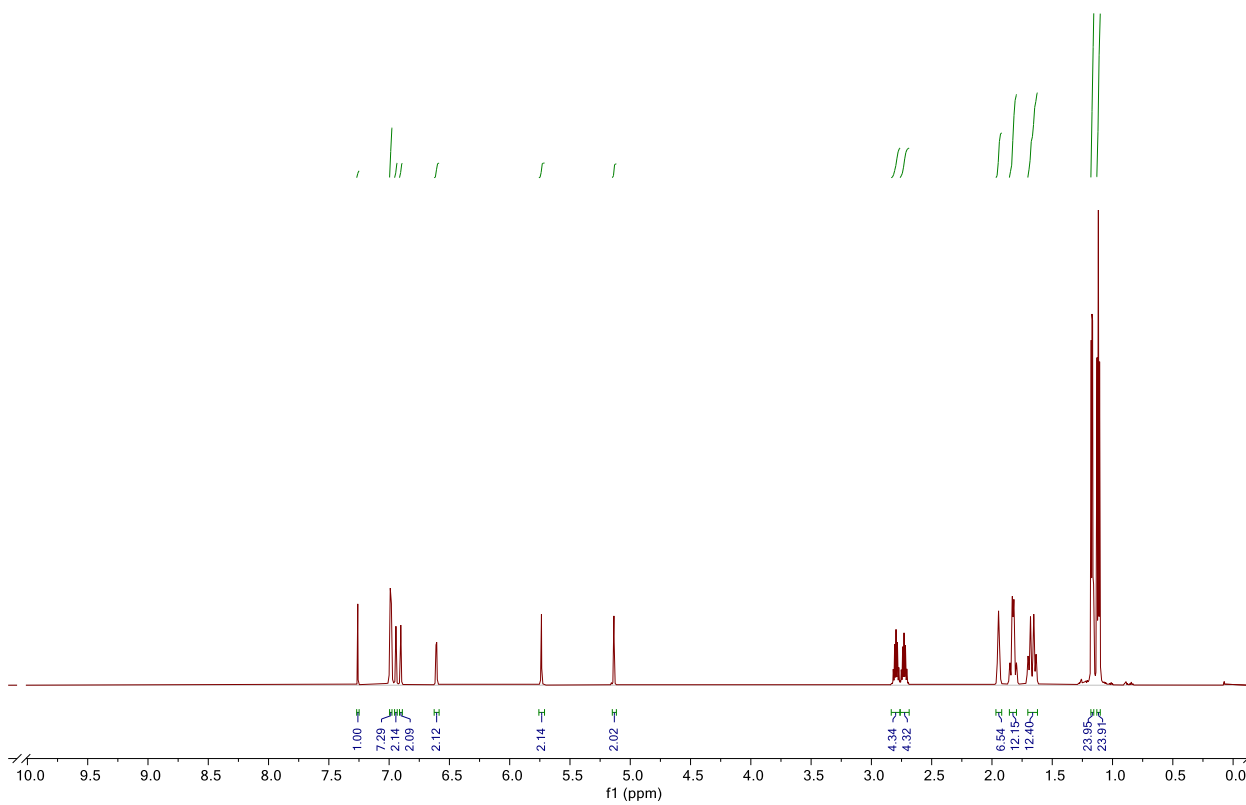

[Return to table of contents]

### <sup>31</sup>P NMR

JM4062\_PAr2\_31P.5.fid  
Speedtype CC08050490  
31p.cocnmr.av600 CDCl3 /opt/nmrdata/u/ senjiema 6

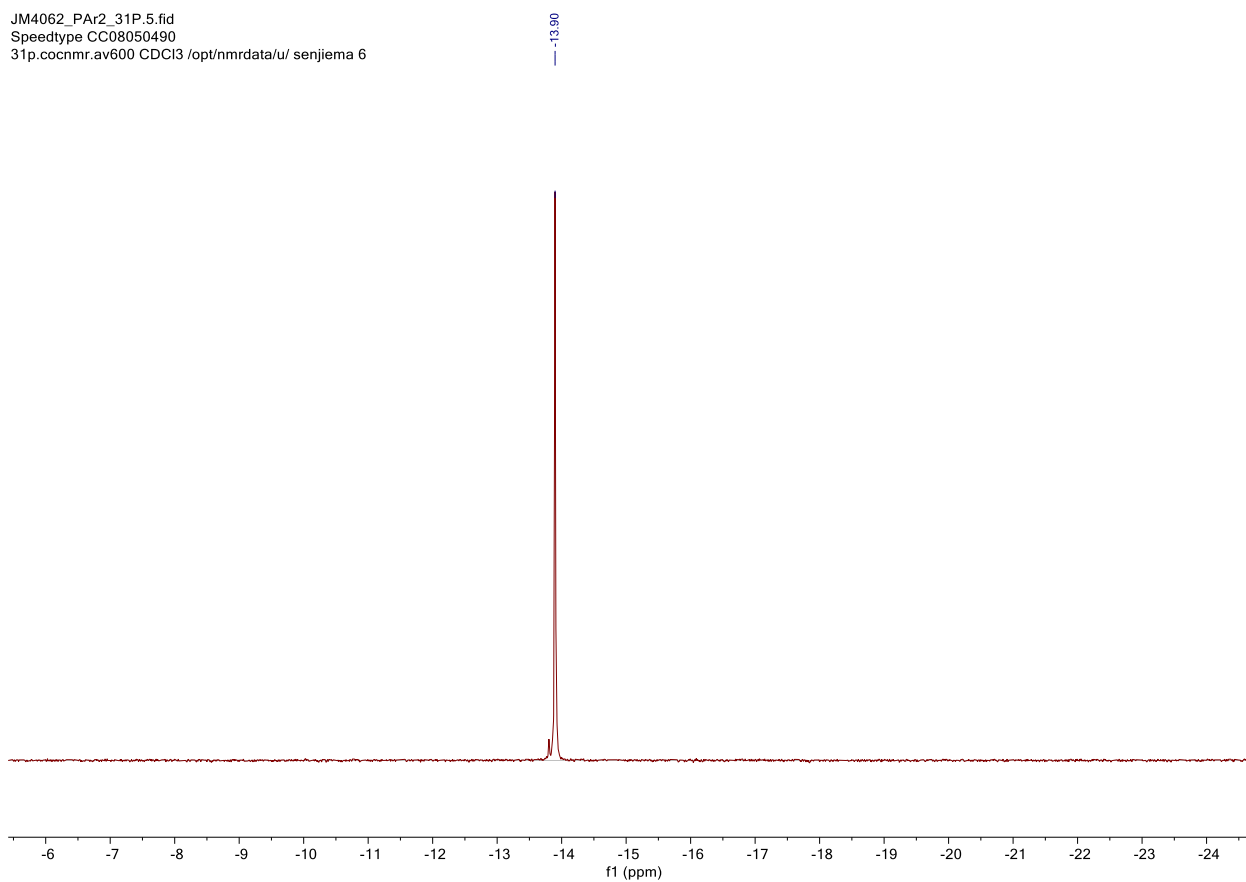



## Compound 3ab

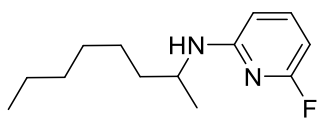

## <sup>1</sup>H NMR

JM4066A\_prod\_1H.1.fid  
Speedtype CC08050490  
1h.cocnmr.av600 CDCl3 /opt/nmrdata/u/ senjiema 1

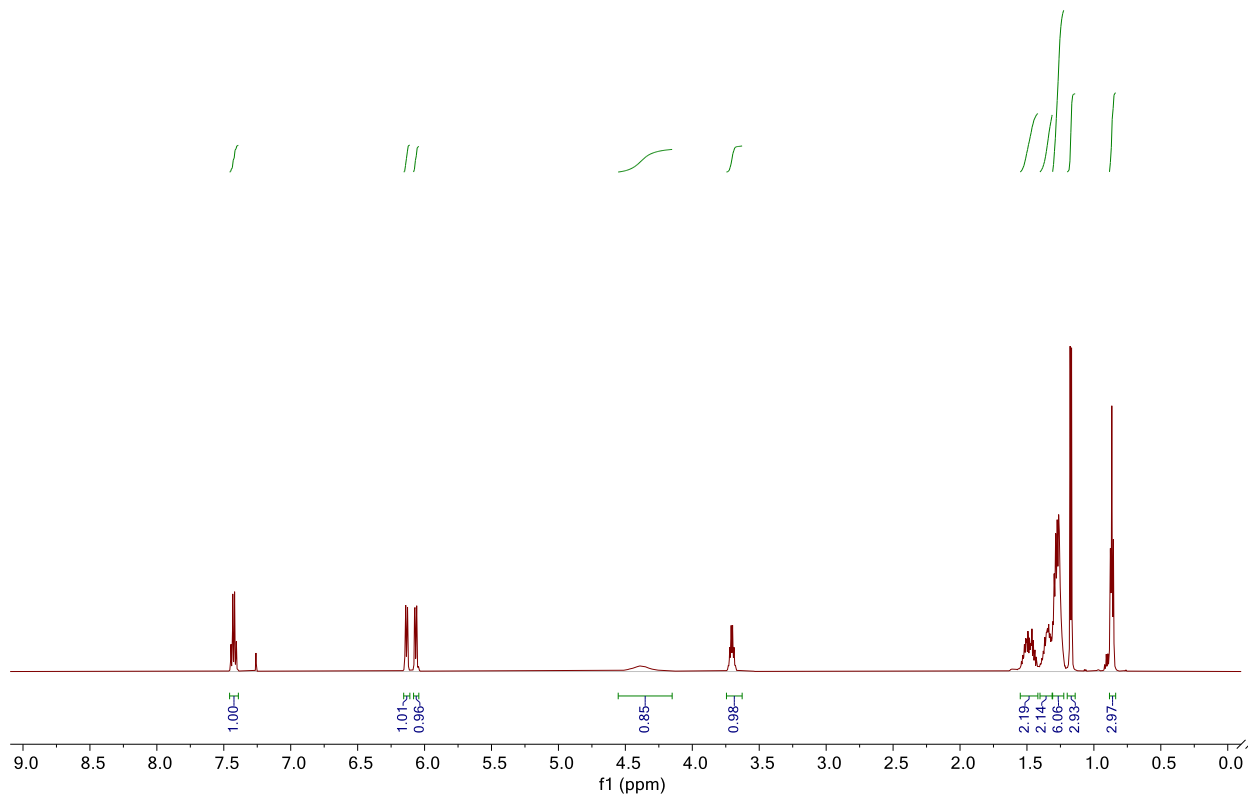

### <sup>13</sup>C NMR

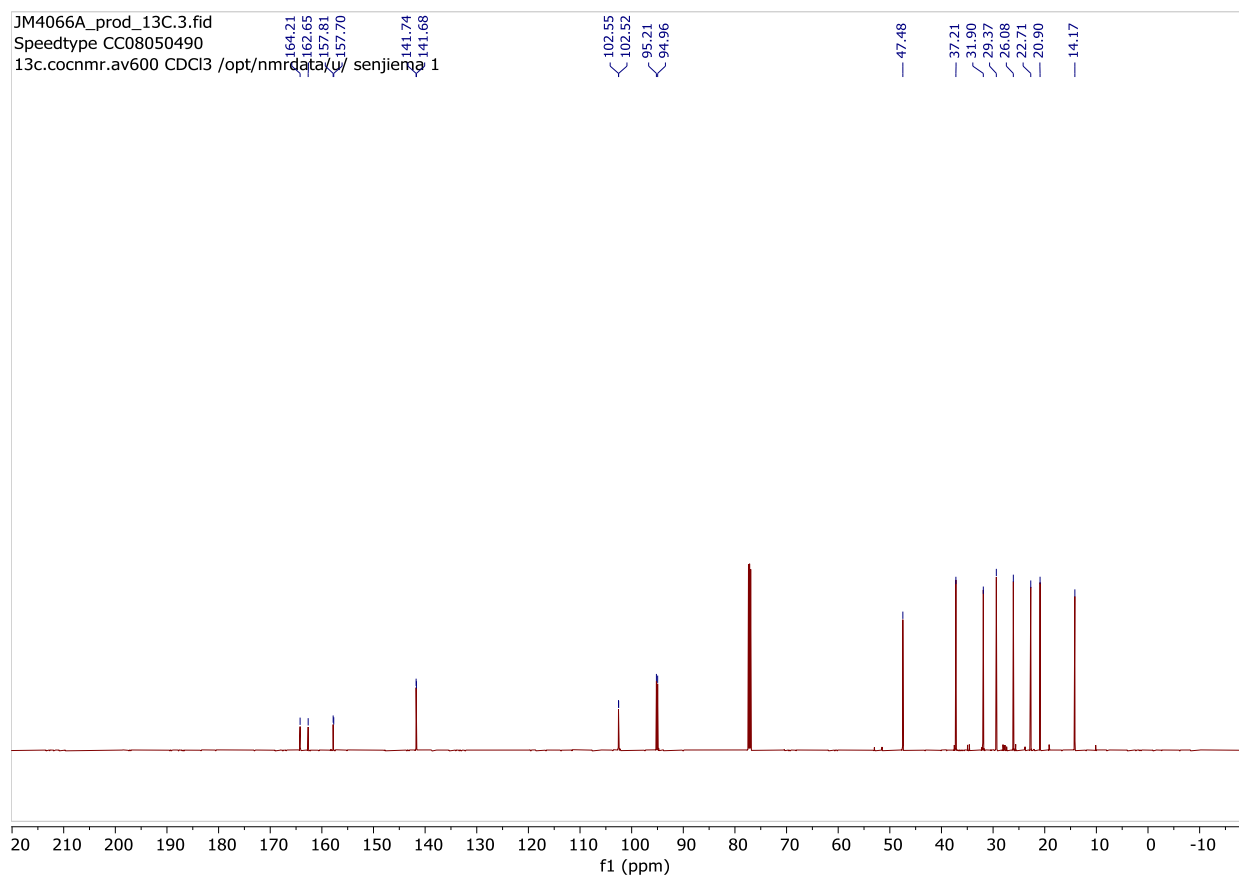

[Return to table of contents]

# <sup>19</sup>F NMR

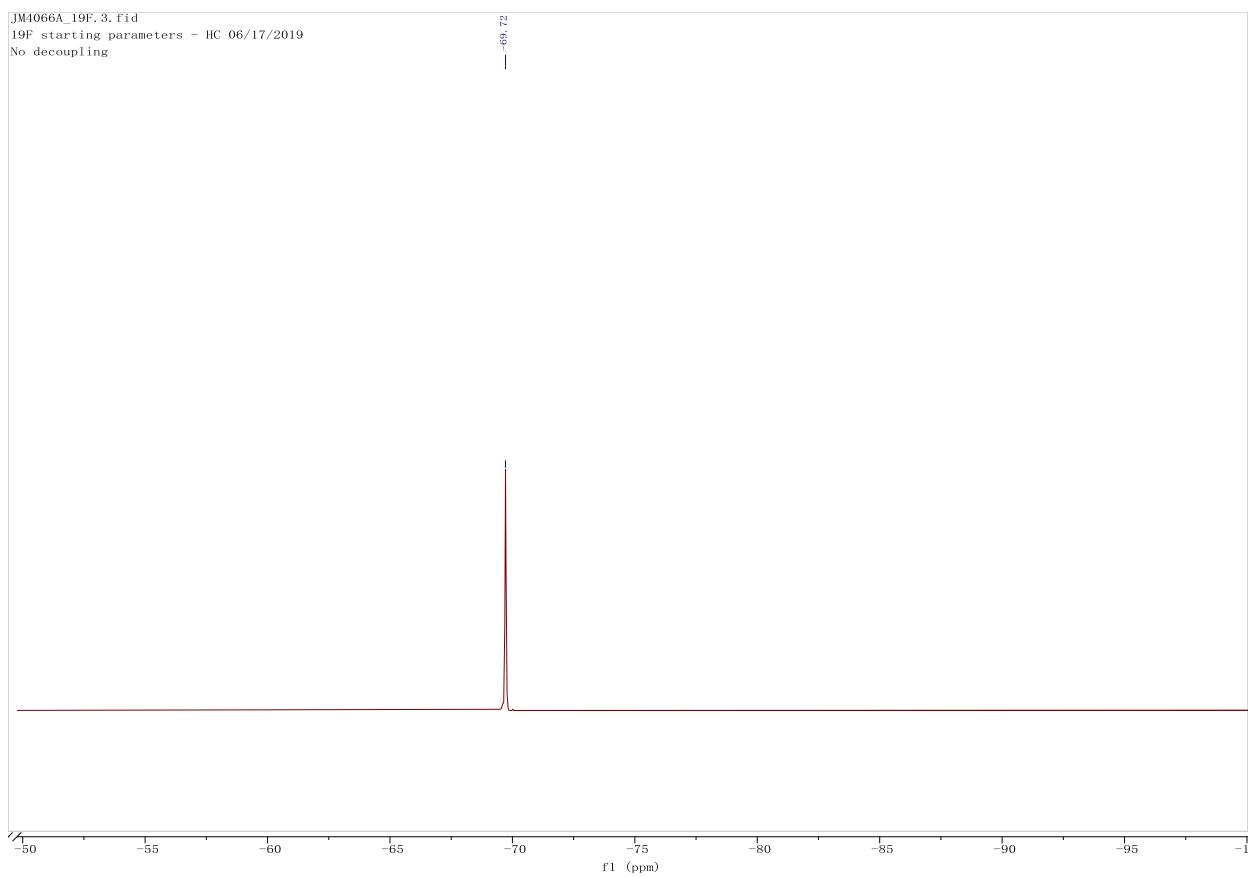

### Compound 3bb

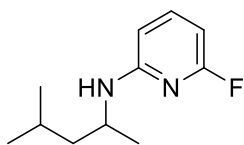

### <sup>1</sup>H NMR

JM4069C\_prod\_1H.1.fid  
Speedtype CC08050490  
1h.cocnmr.av600 CDCl3 /opt/nmrdata/u/ senjiema 2

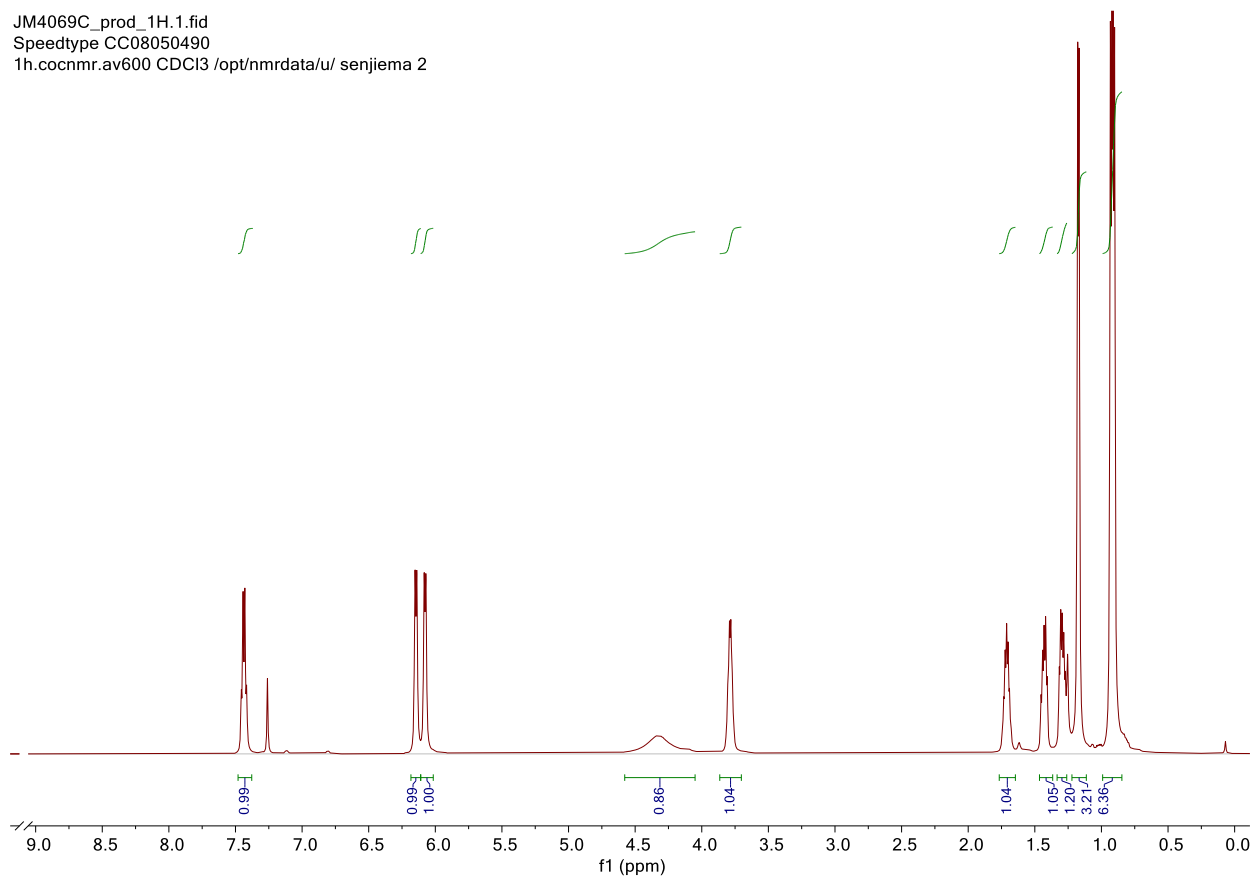

# <sup>13</sup>C NMR

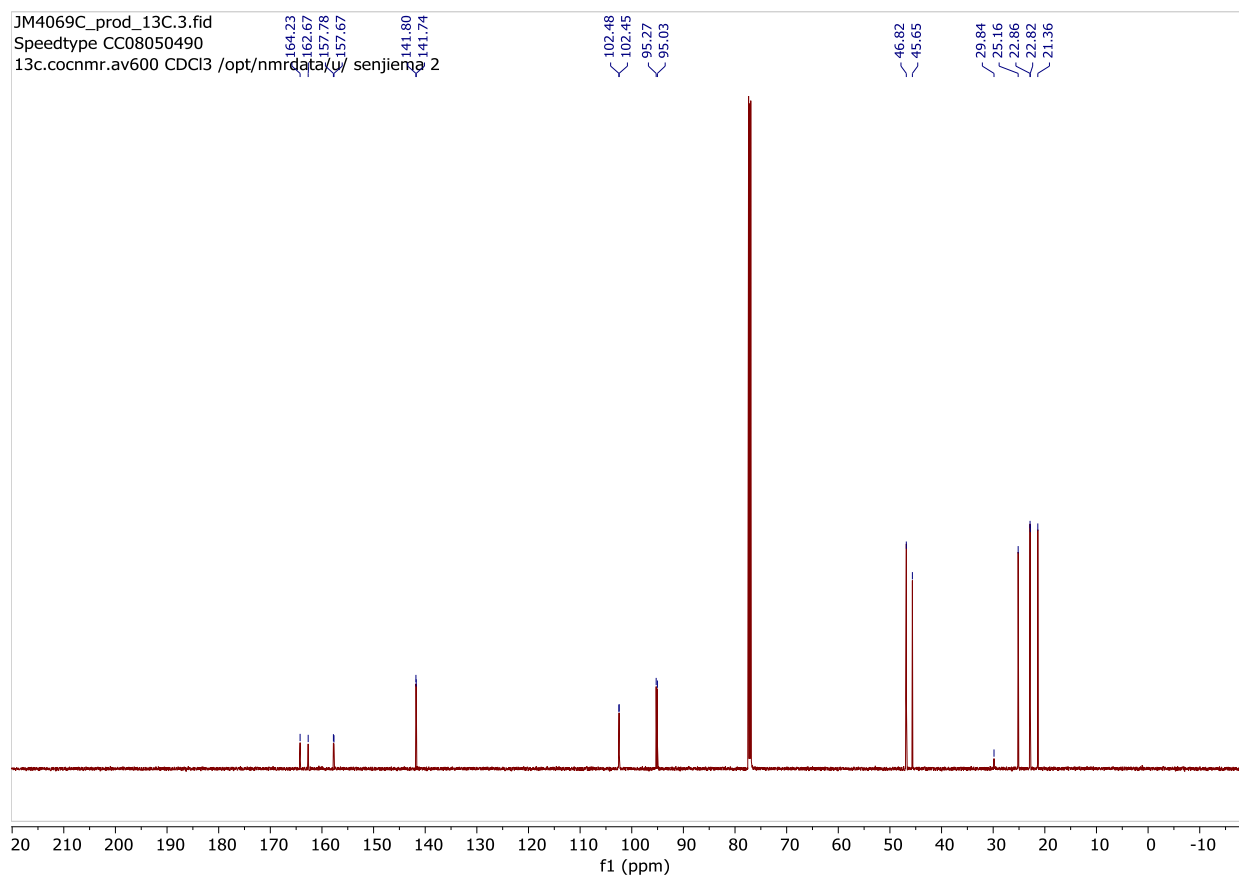

**<sup>19</sup>F NMR**

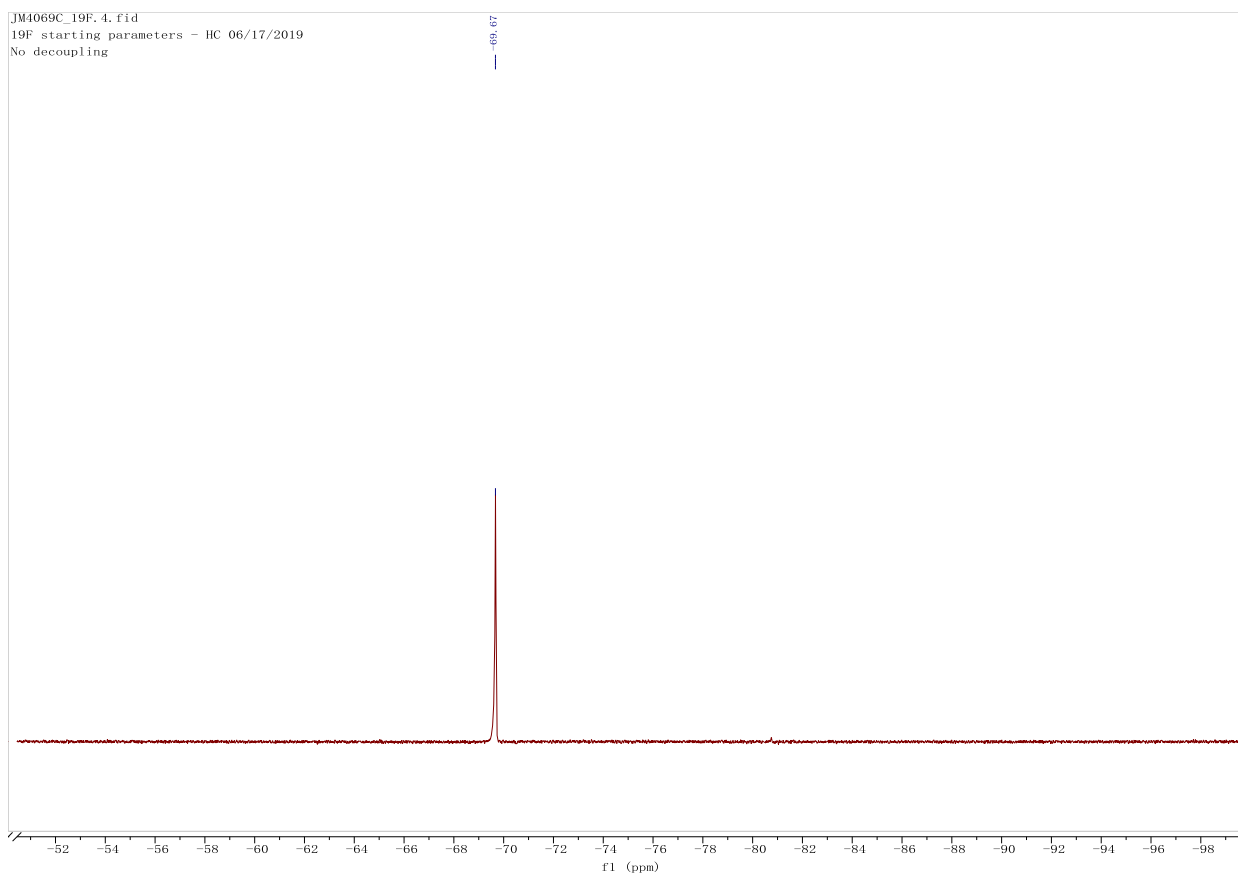



# <sup>13</sup>C NMR

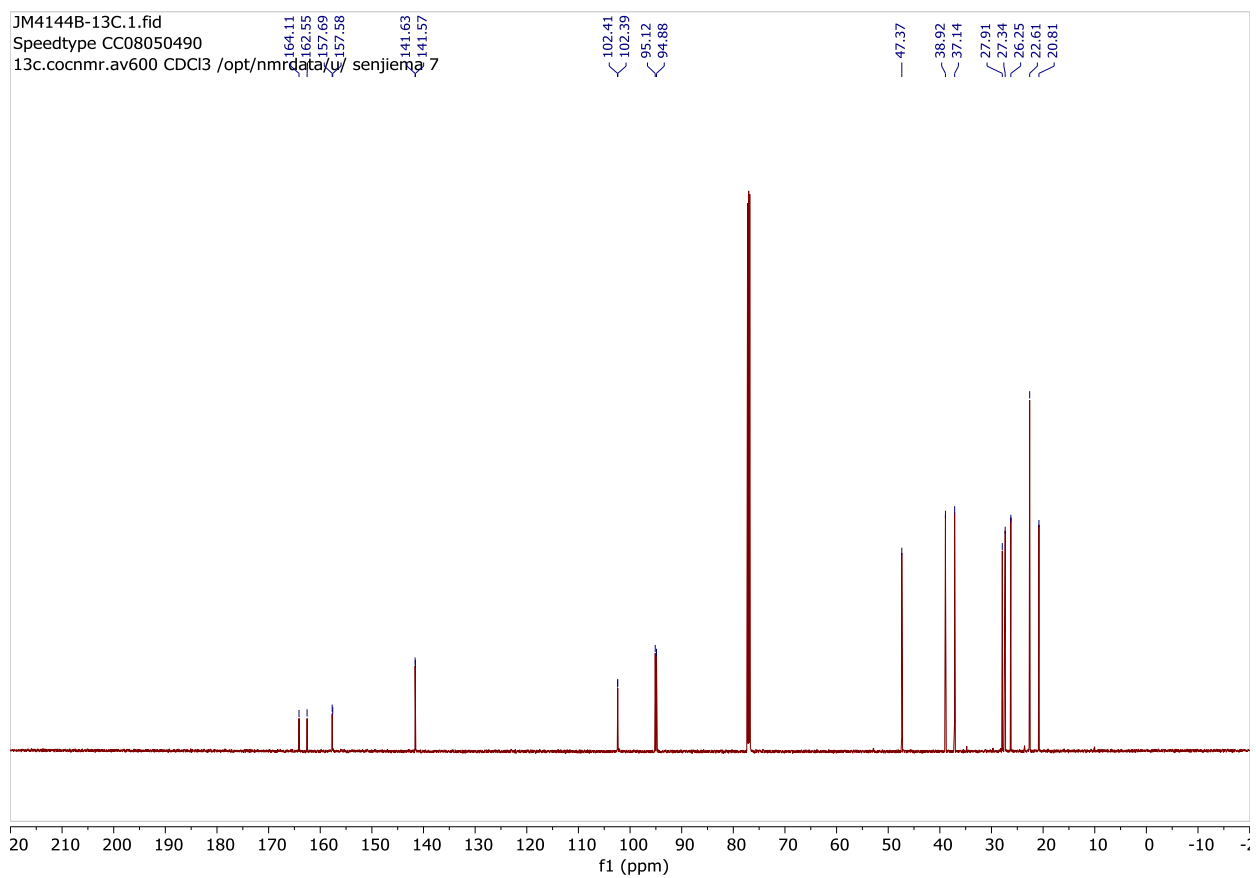



[Return to table of contents]

# <sup>19</sup>F NMR

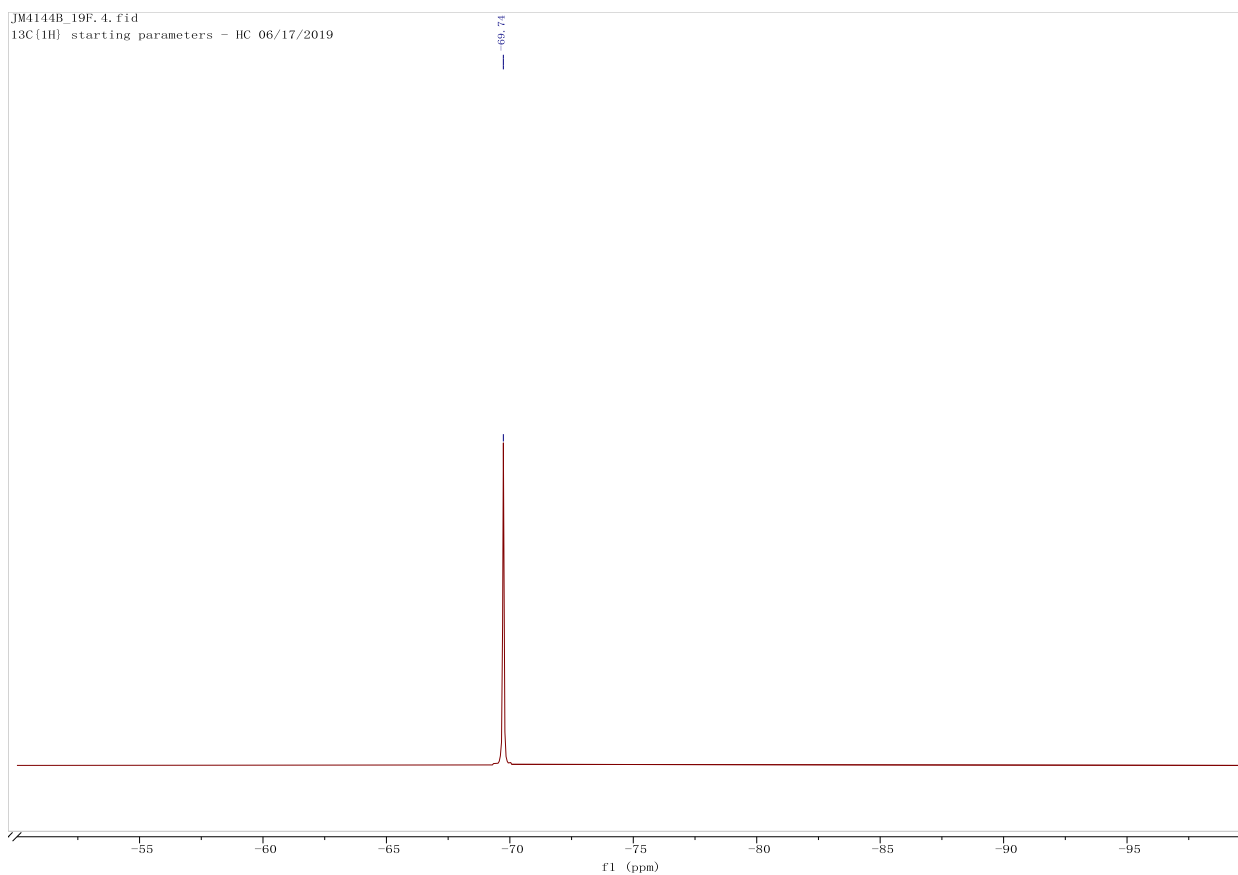

[Return to table of contents]

## Compound 3db

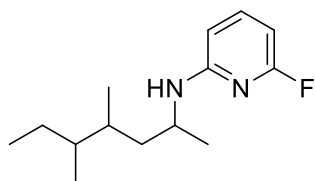

## <sup>1</sup>H NMR

JM4261\_86\_1H.2.fid  
1H starting parameters - HC 06/17/2019  
No decoupling

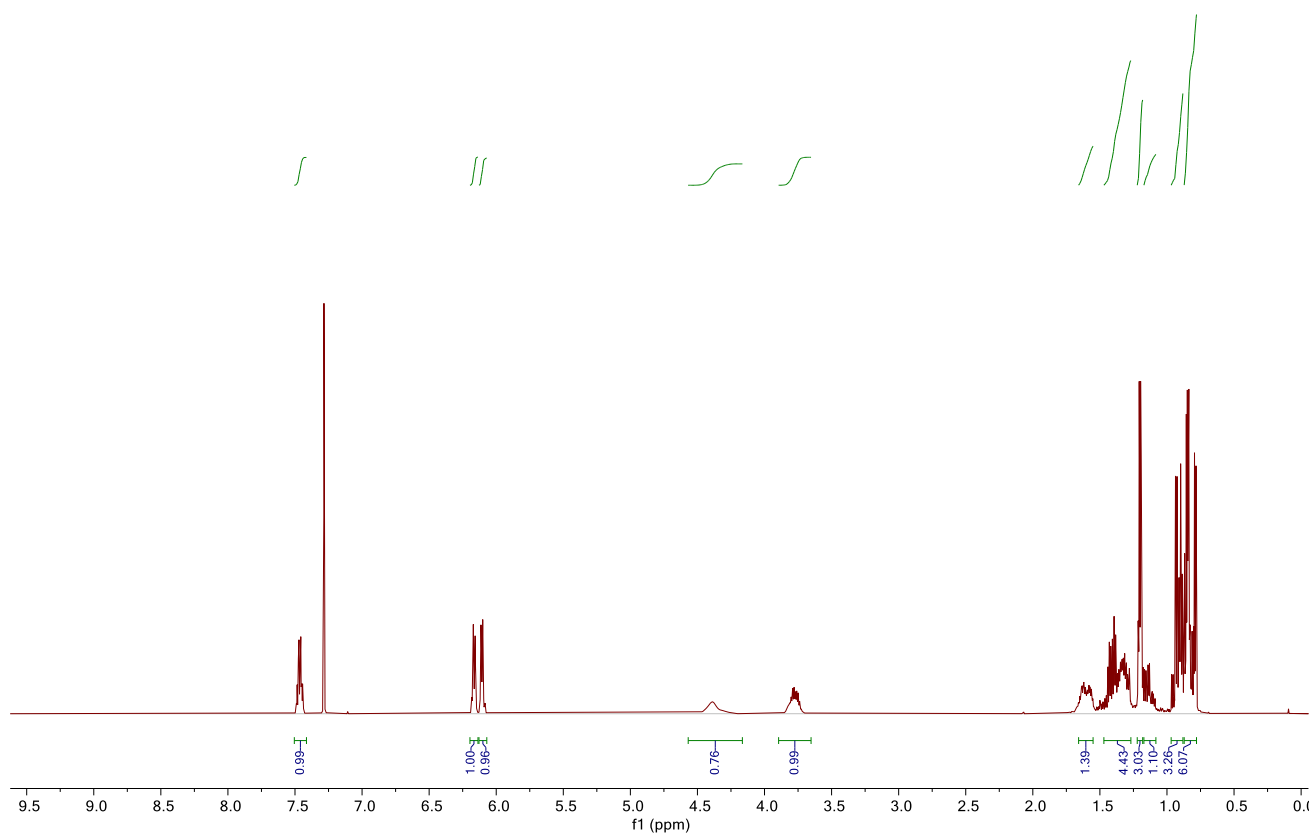

# <sup>13</sup>C NMR

JM-4261-86.13.fid  
Speedtype CC08050490  
13c.cocnmr.av600 CDCl3 /opt/nmrdata/

164.27  
162.71  
157.71  
157.60  
157.49

141.80  
141.78  
141.74  
141.72

102.50  
102.48  
102.46  
95.36  
95.31  
95.11  
95.06

46.01  
45.72  
42.77  
40.55  
39.74  
38.68  
34.34  
33.33  
27.90  
25.01  
20.03  
20.67  
16.89  
15.88  
14.63  
14.11  
12.38  
12.30

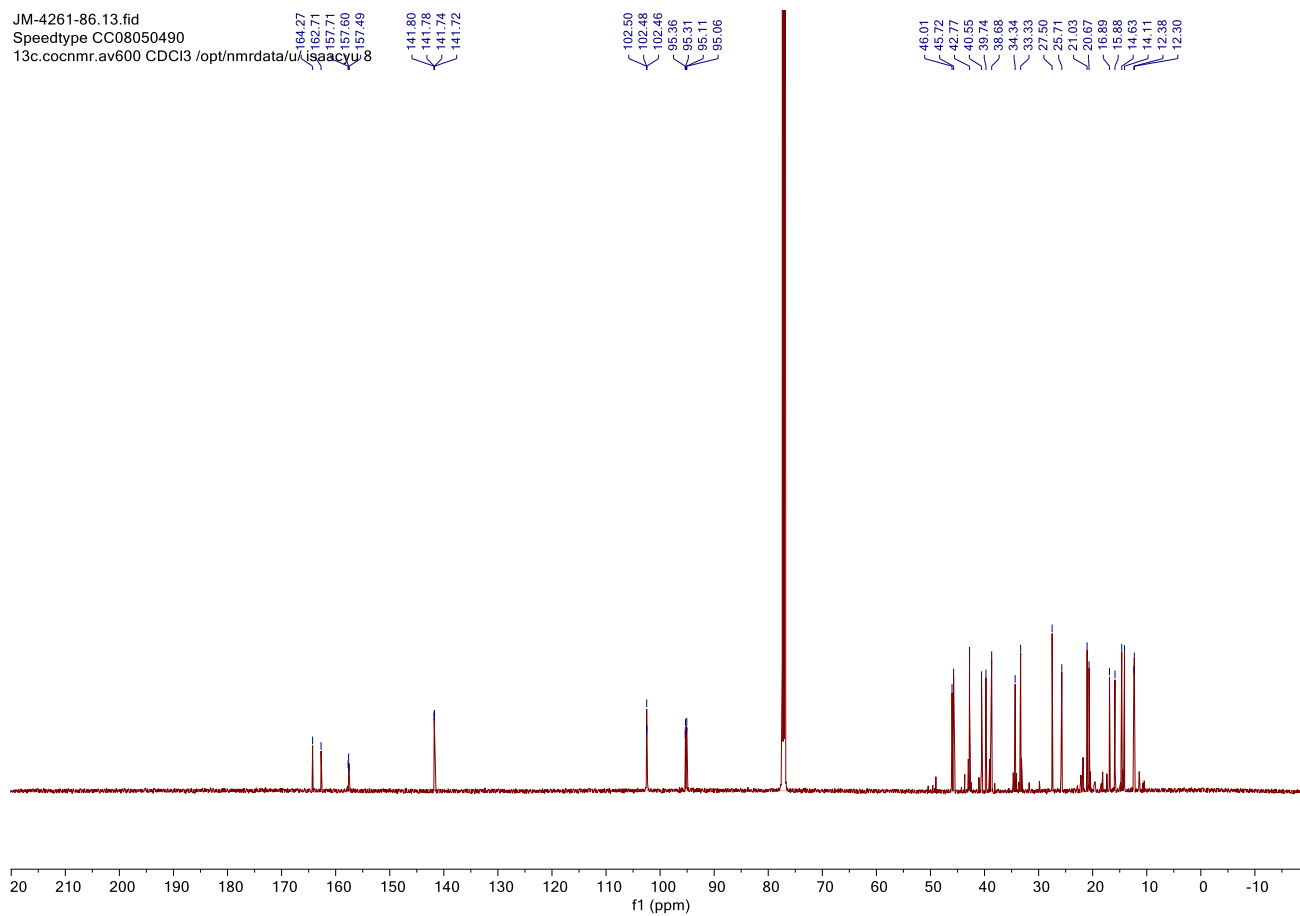

[Return to table of contents]

# <sup>19</sup>F NMR

JM4261\_86\_19F.3.fid  
1H starting parameters - HC 06/17/2019  
No decoupling

69.66  
69.68  
69.70  
69.72

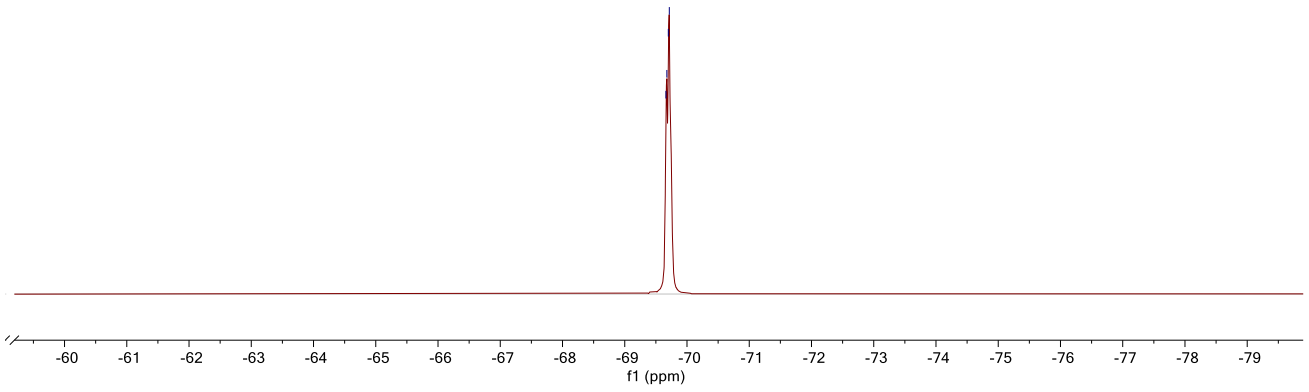

[Return to table of contents]

## DEPT-135 $^{13}\text{C}$ NMR

XYZ\_Jason\_Sample\_01152022.2.fid

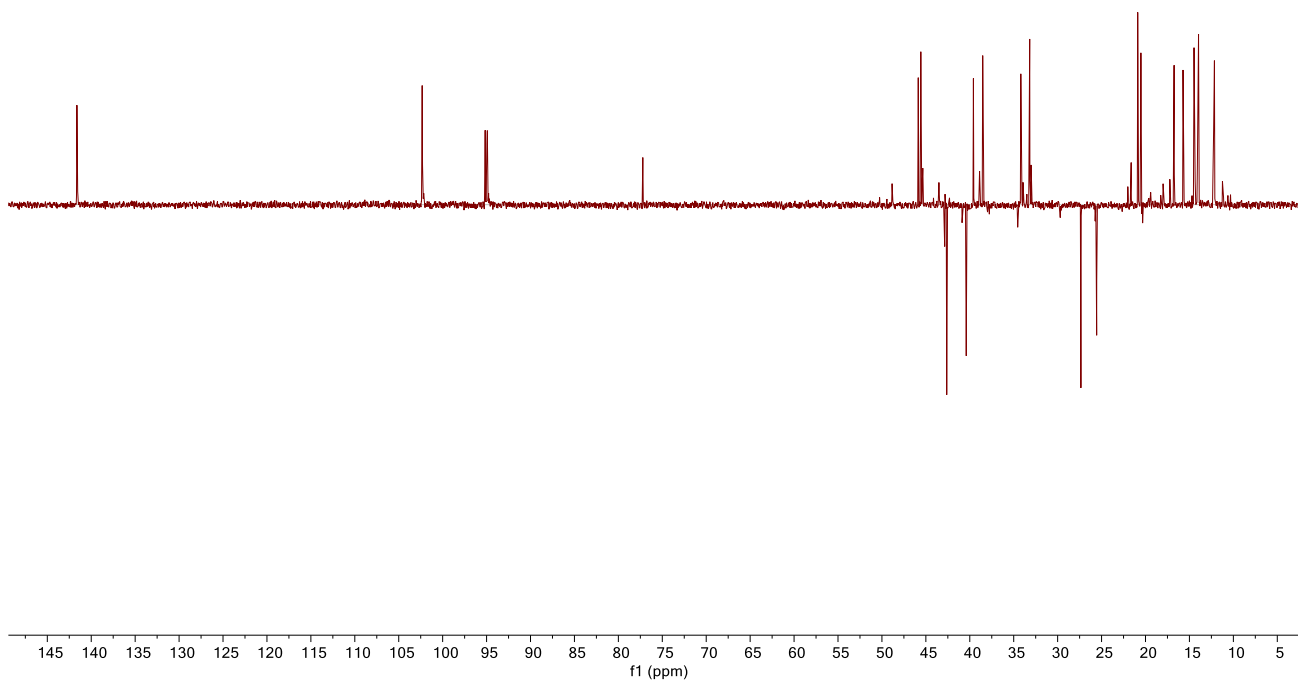

# COSY NMR

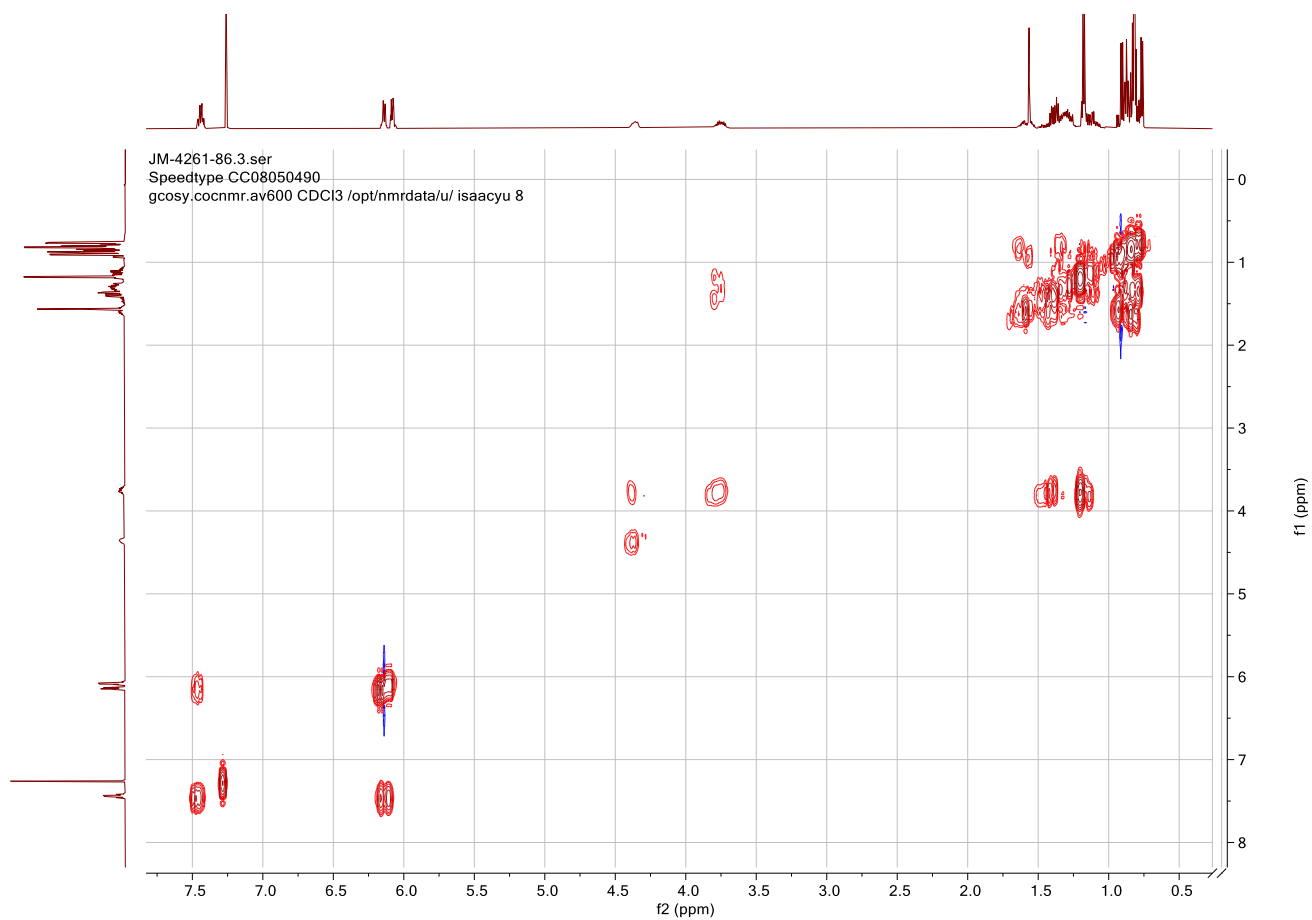

## HSQC NMR

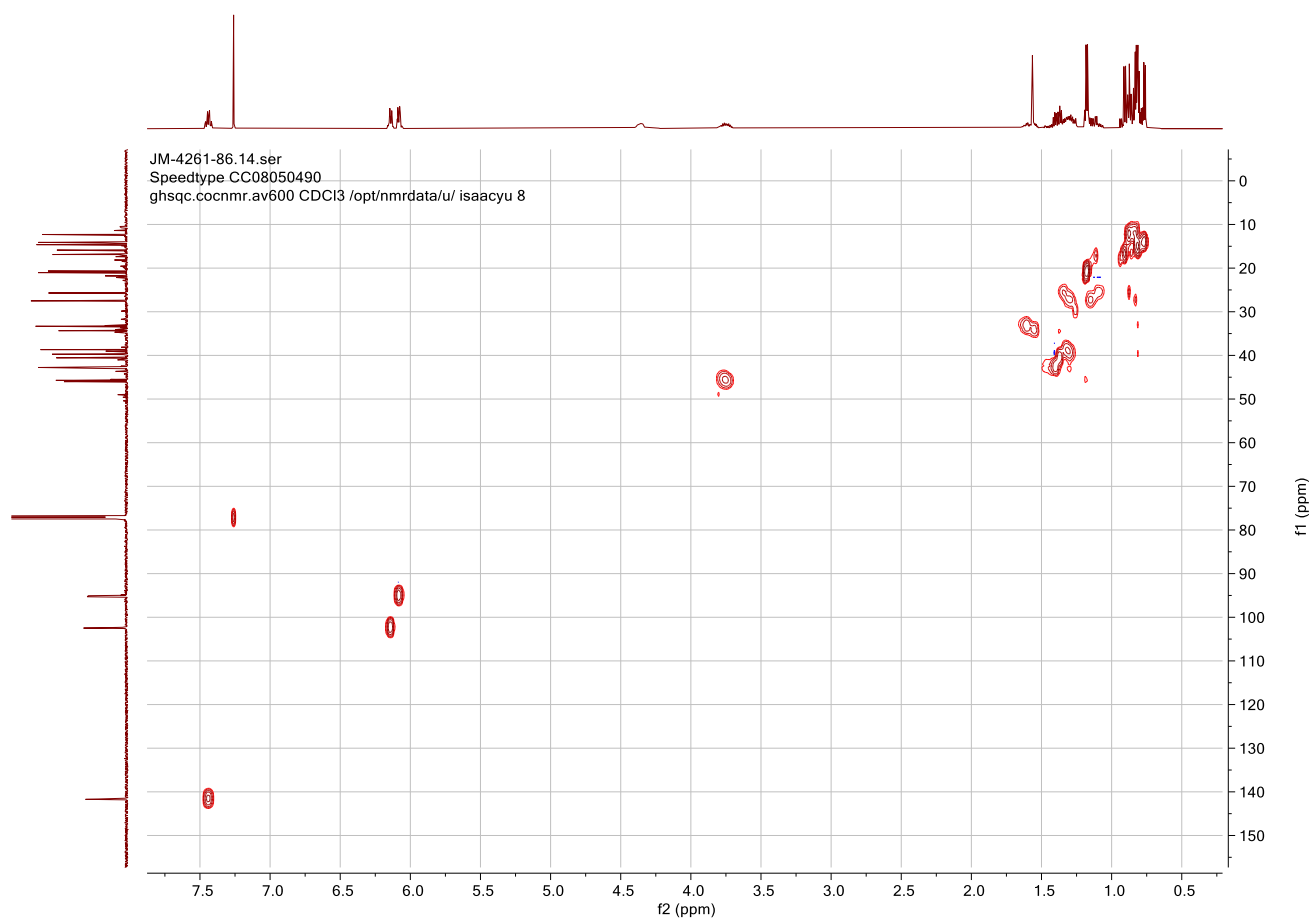

### Compound 3eb

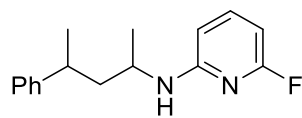

### <sup>1</sup>H NMR

JM4141B\_1H.1.fid  
Speedtype CC08050490  
1h.cocnmr.av600 CDCl3 /opt/nmrdata/u/ senjiema 3

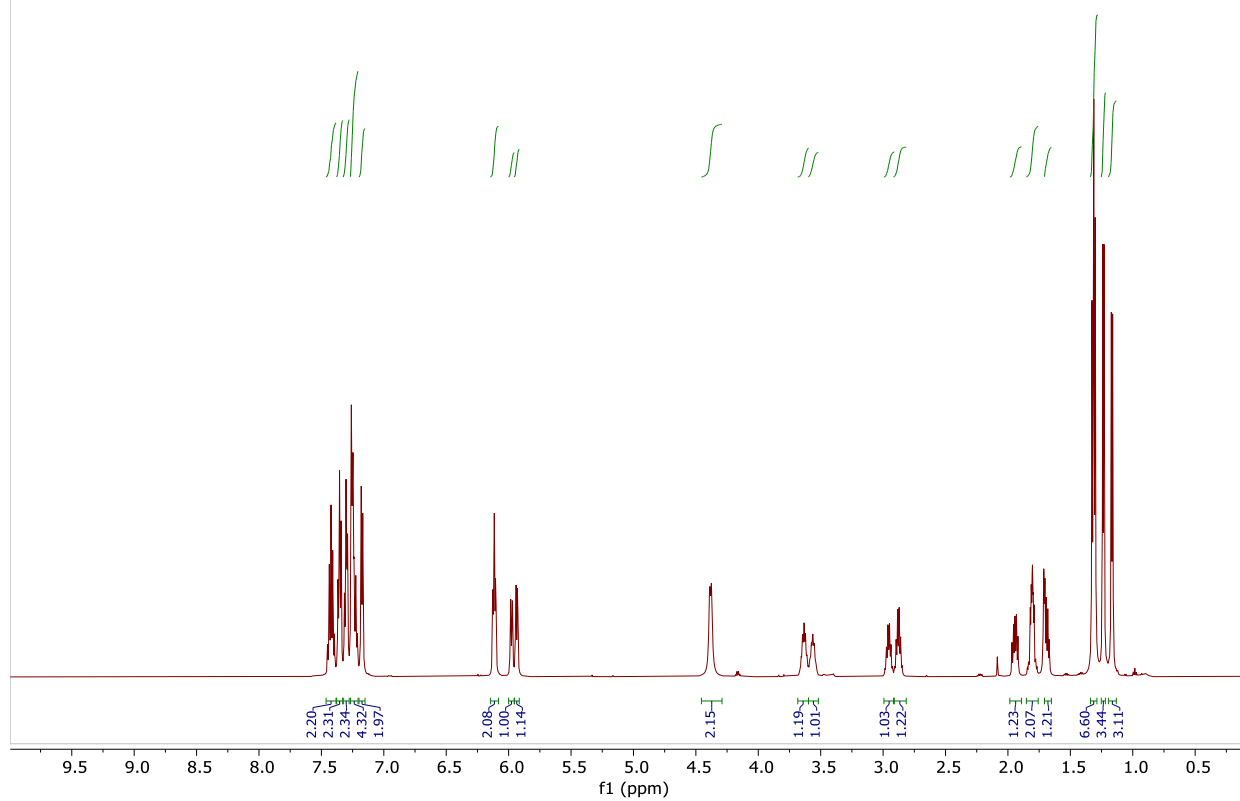



**<sup>13</sup>C NMR**

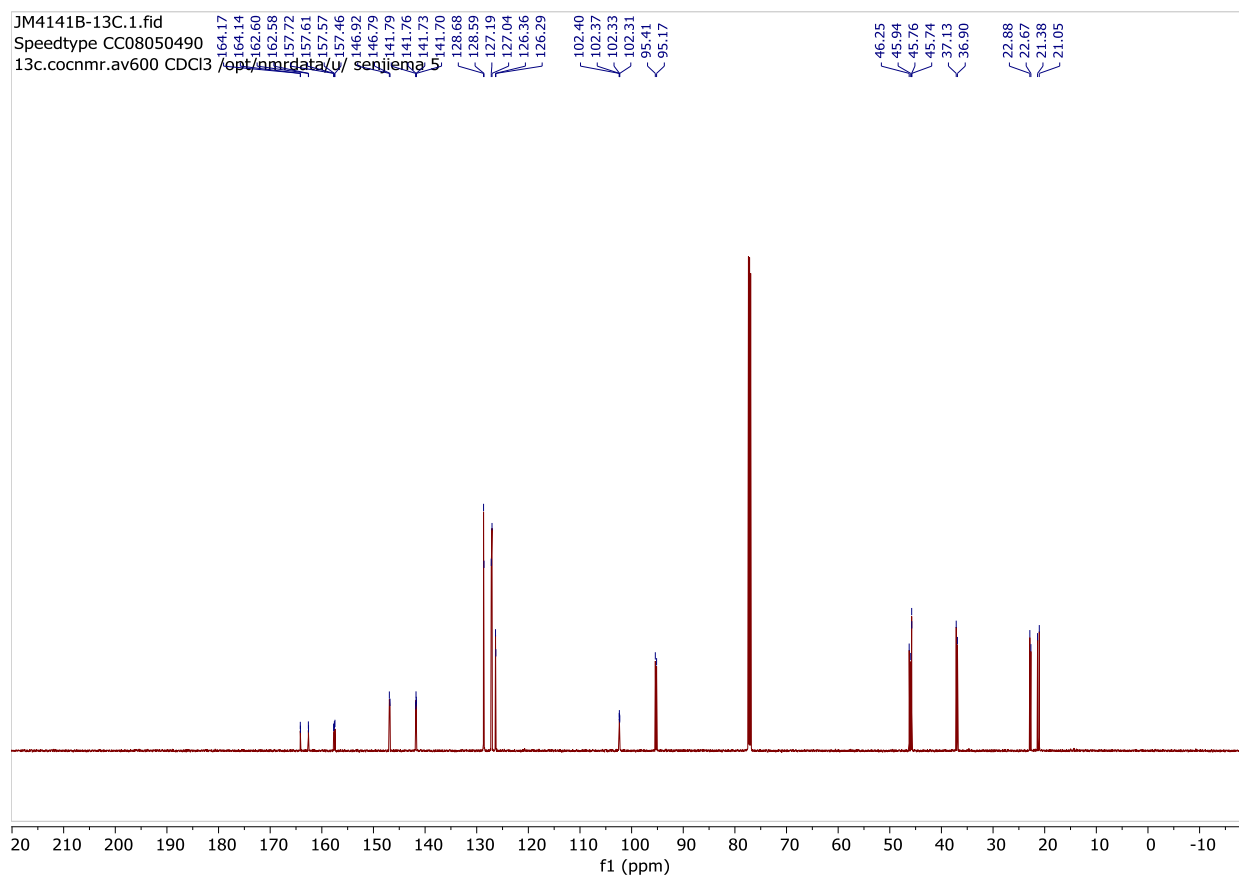

[Return to table of contents]

# <sup>19</sup>F NMR

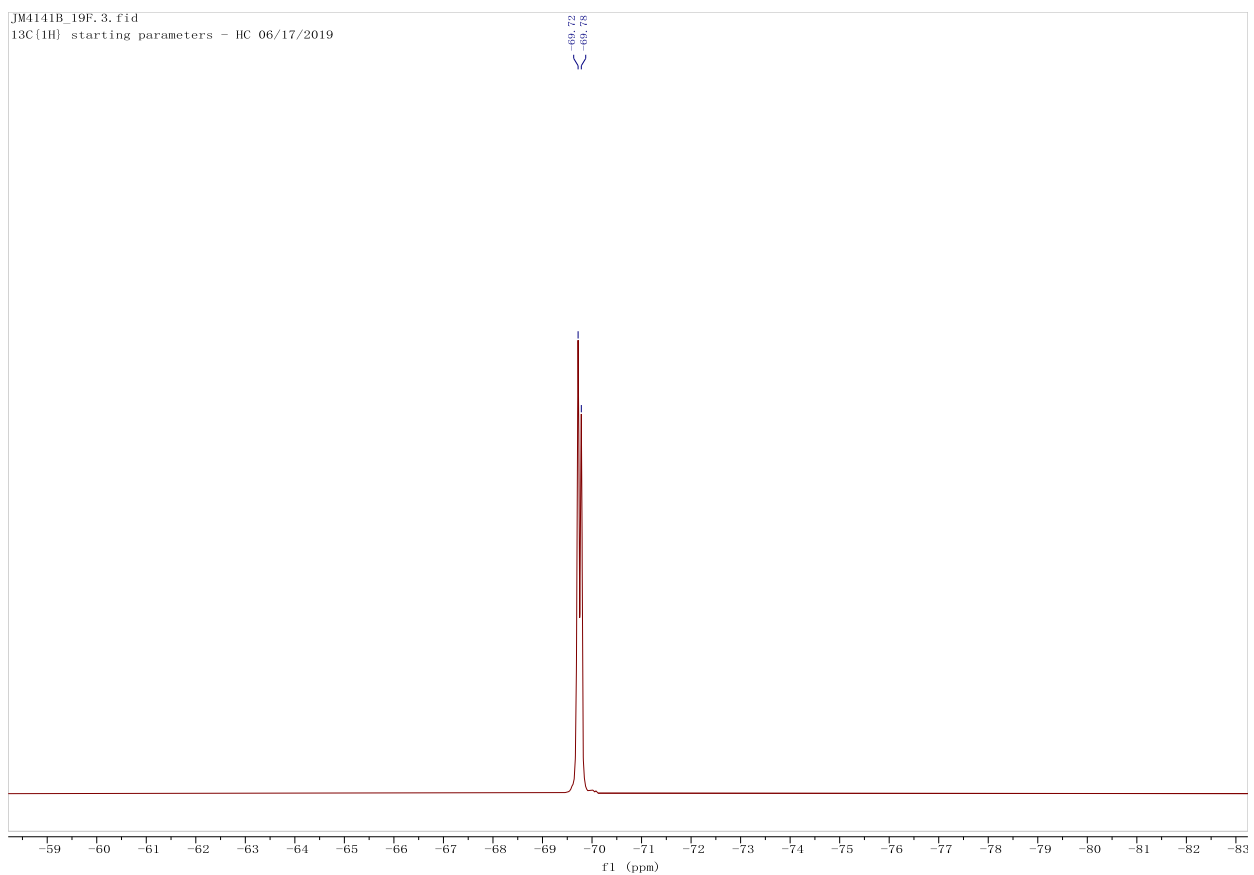

### Compound 3fb

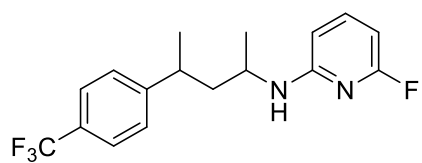

### <sup>1</sup>H NMR

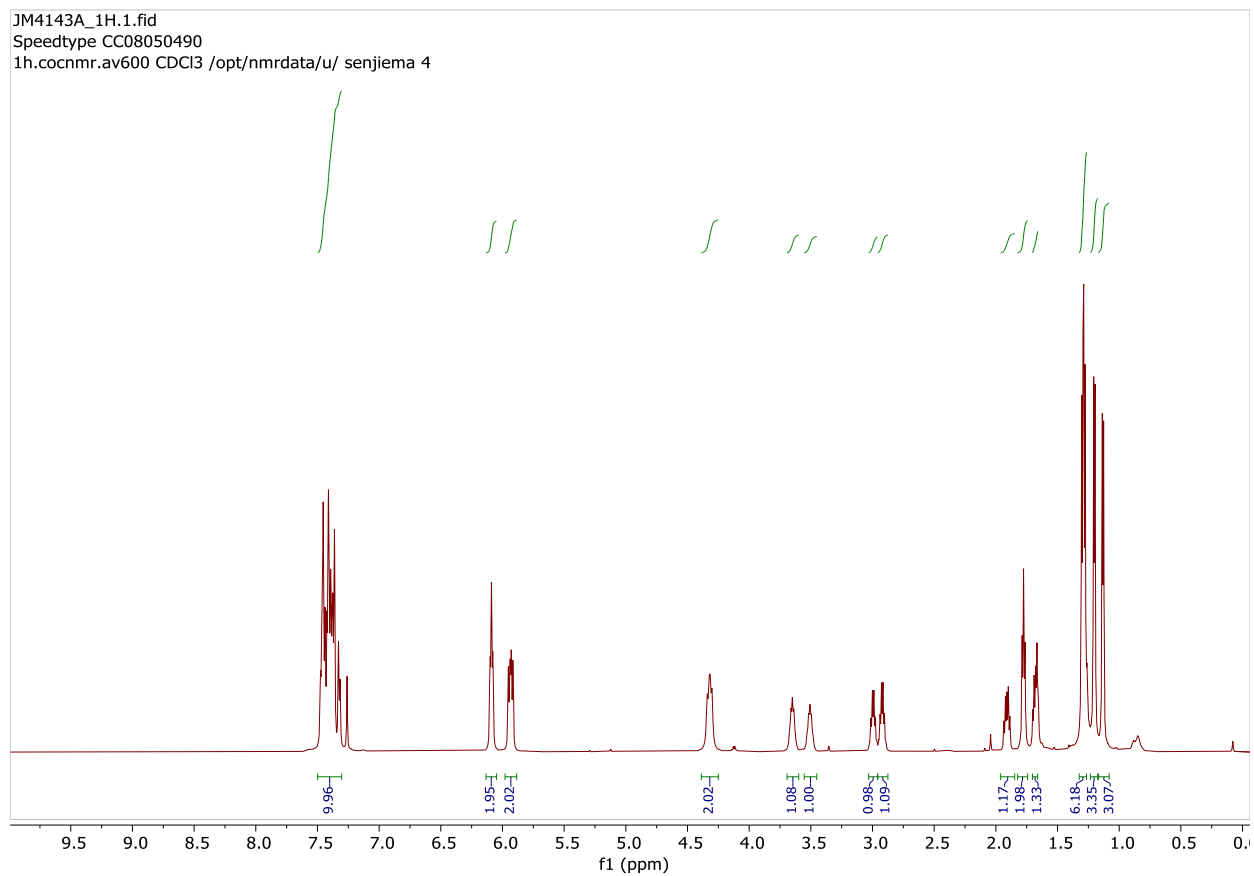

**<sup>13</sup>C NMR**

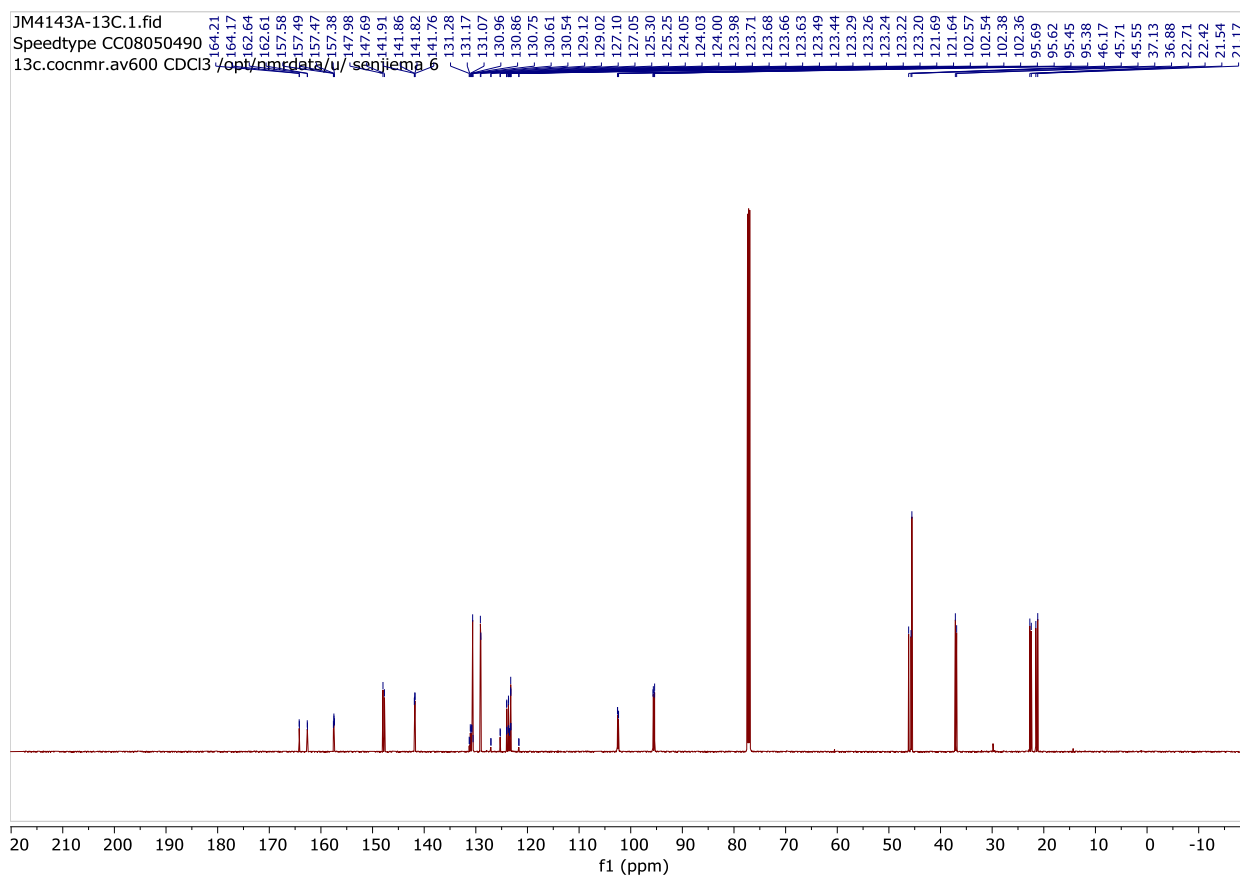

**<sup>19</sup>F NMR**

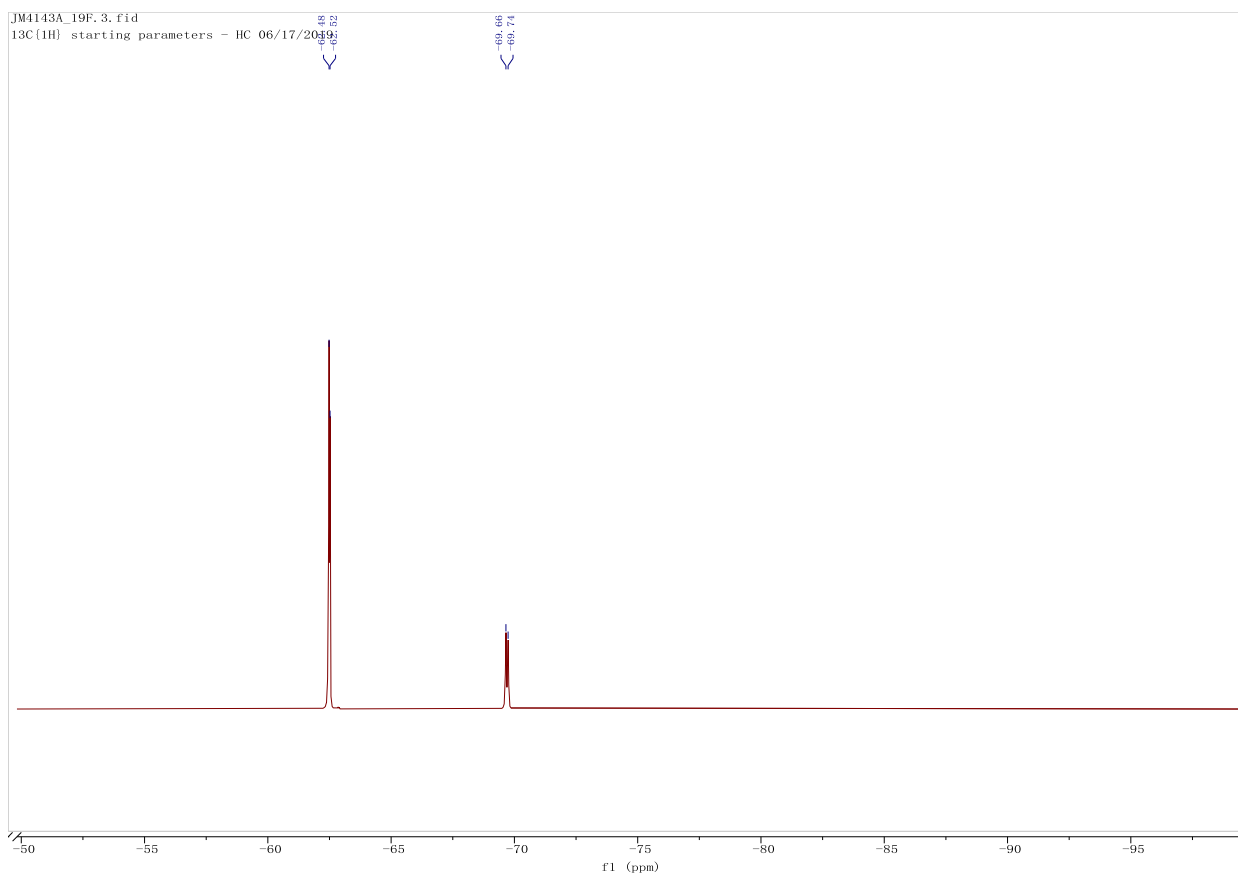

## Compound 3gb

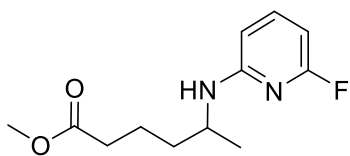

## <sup>1</sup>H NMR

JM4082F\_prod\_new\_1H.12.fid  
Speedtype CC08050490  
1h.cocnmr.av600 CDCl3 /opt/nmrdata/u/ senjiema 4

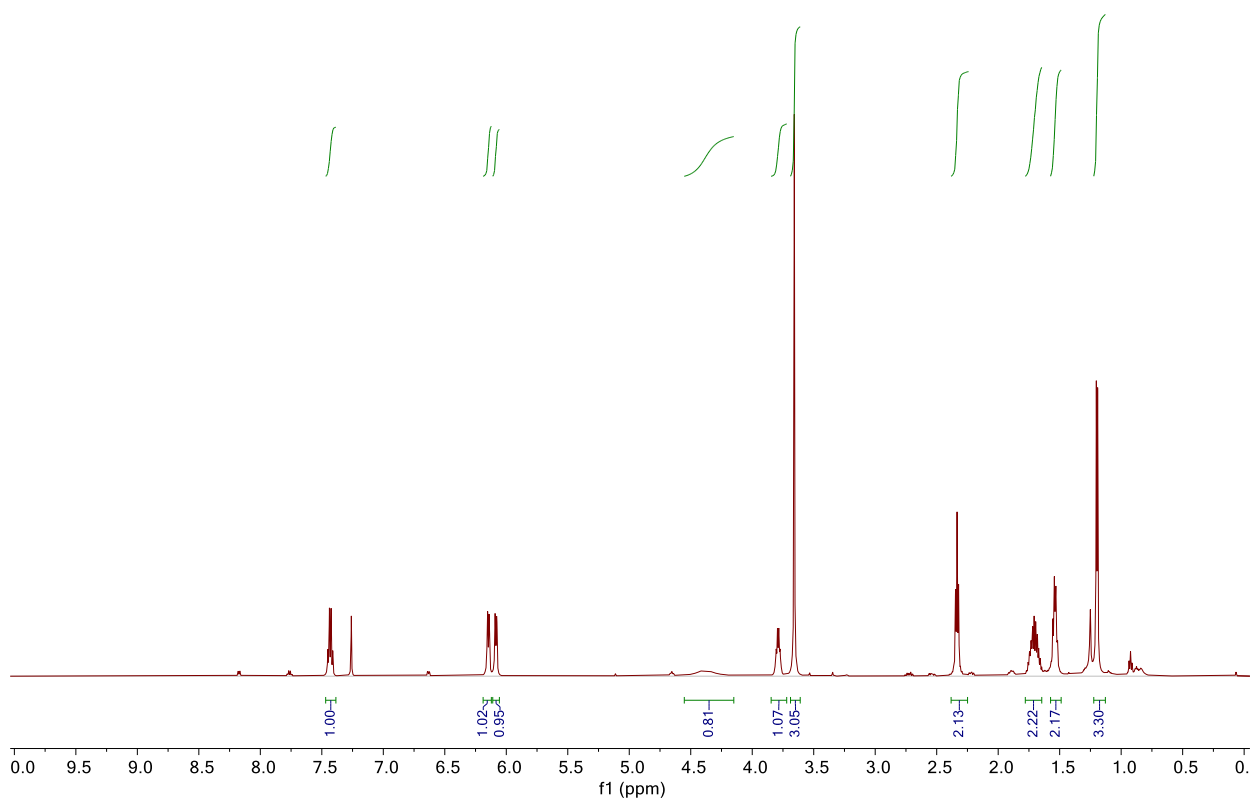

**<sup>13</sup>C NMR**

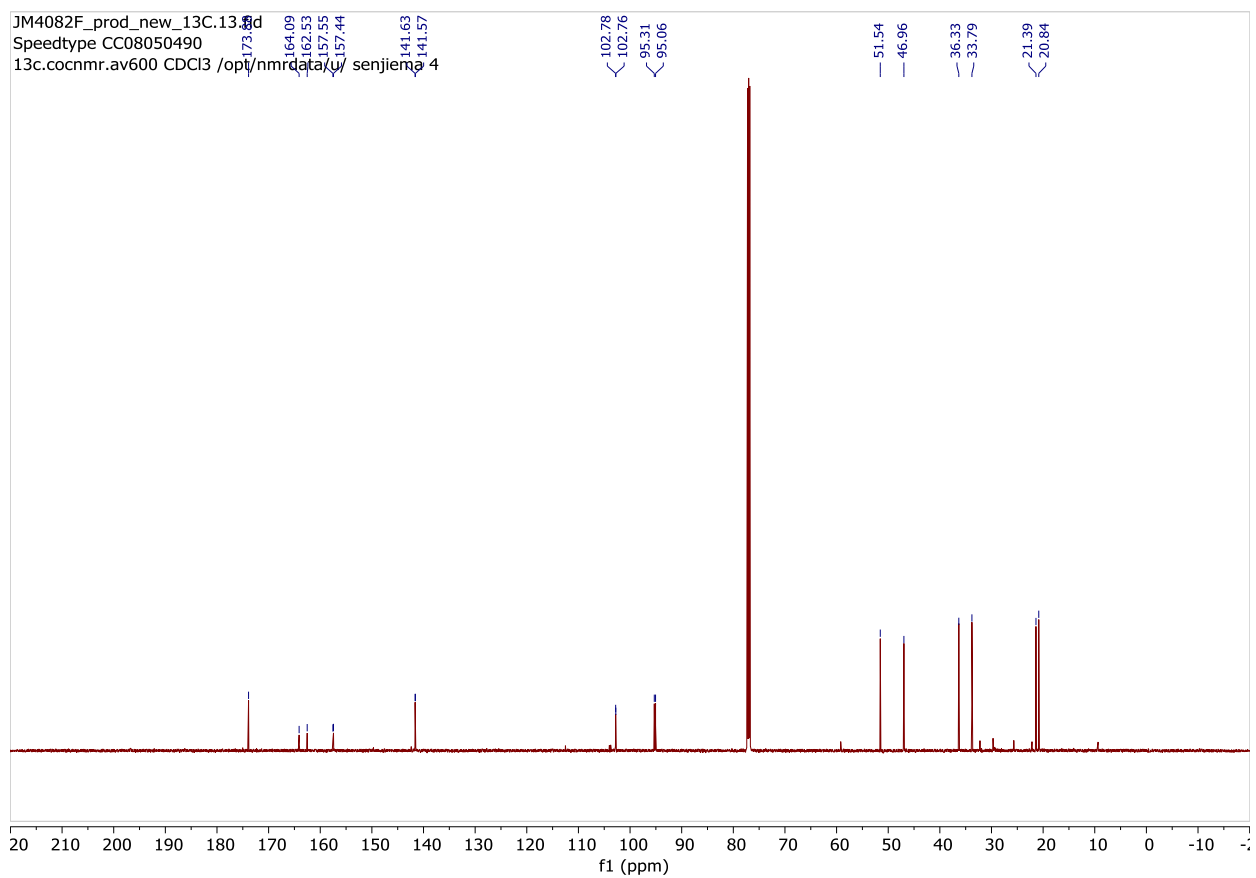

[Return to table of contents]

# <sup>19</sup>F NMR

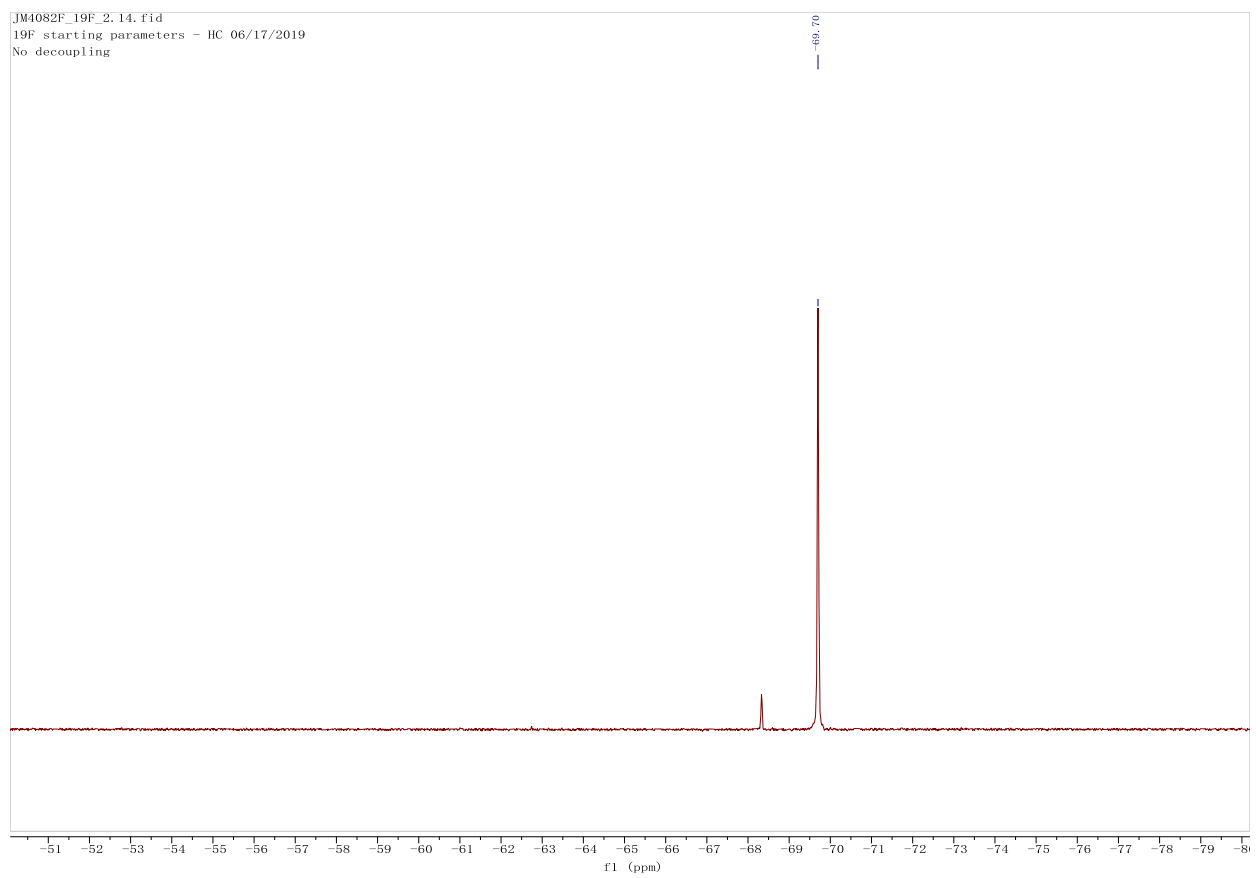



### Compound 3hb

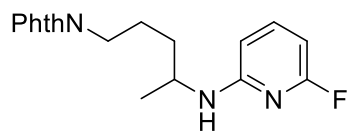

### <sup>1</sup>H NMR

JM4069E\_prod\_new\_1H.1.fid  
Speedtype CC08050490  
1h.cocnmr.av600 CDCl3 /opt/nmrdata/u/ senjiema 3

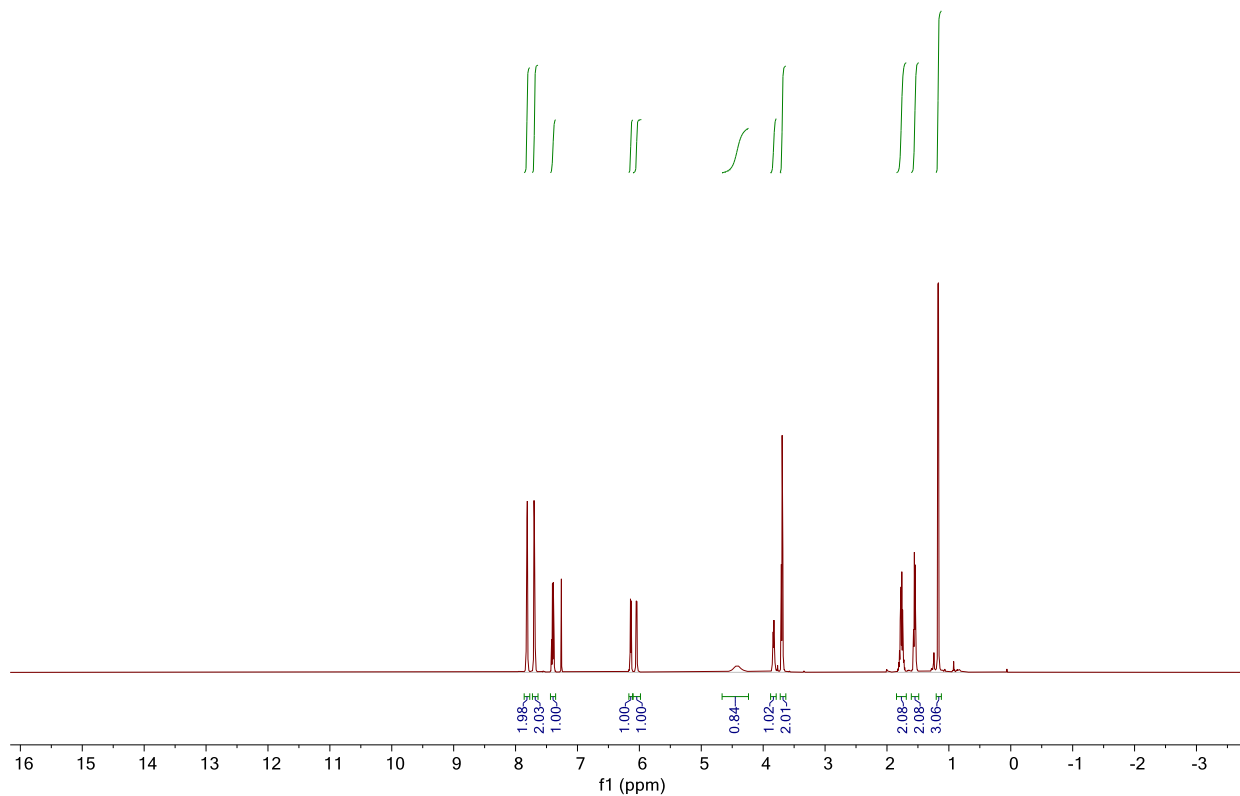

### <sup>13</sup>C NMR

JM4069E\_prod\_new\_13C.3.fid  
Speedtype CC08050490  
13c.cocnmr.av600 CDCl3 /opt/nmrdata/

senjiema3

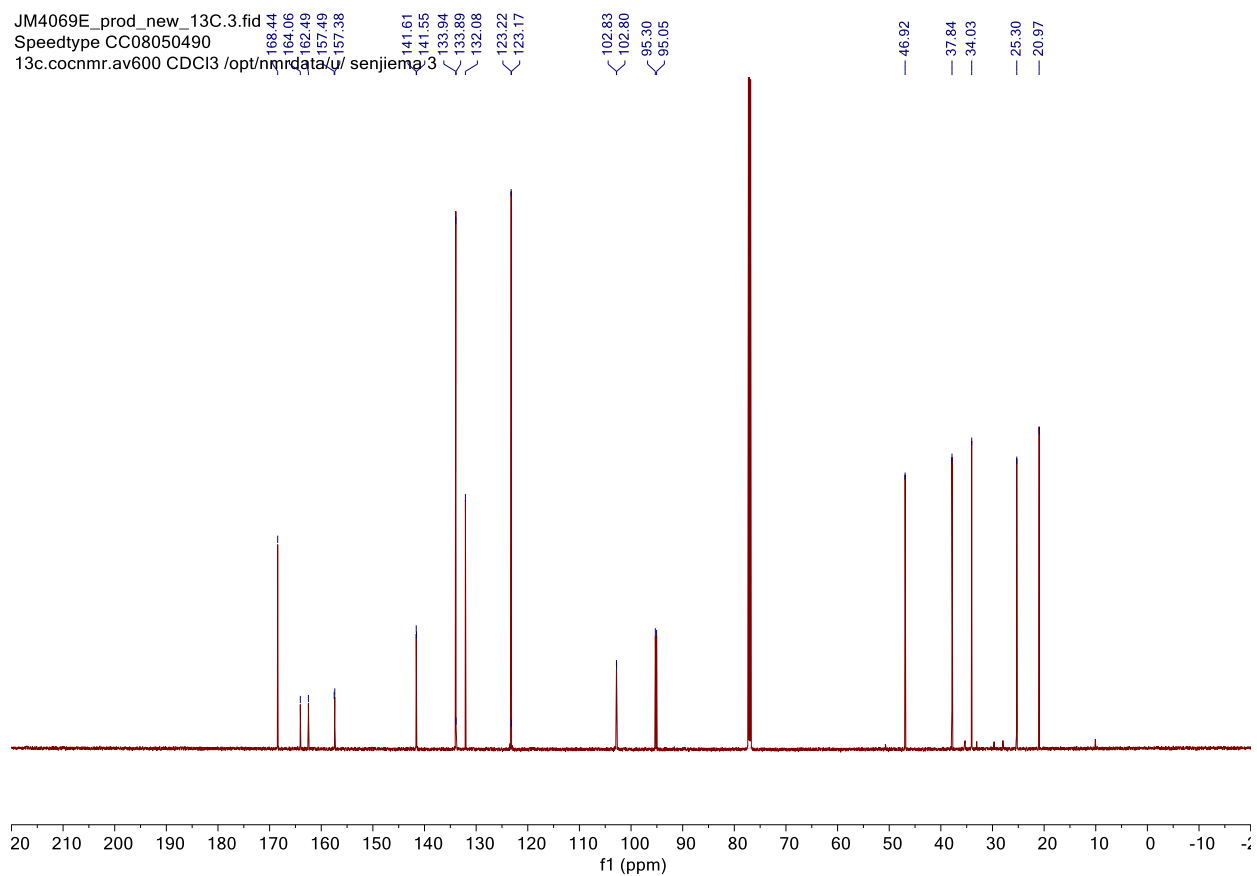

[Return to table of contents]

# <sup>19</sup>F NMR

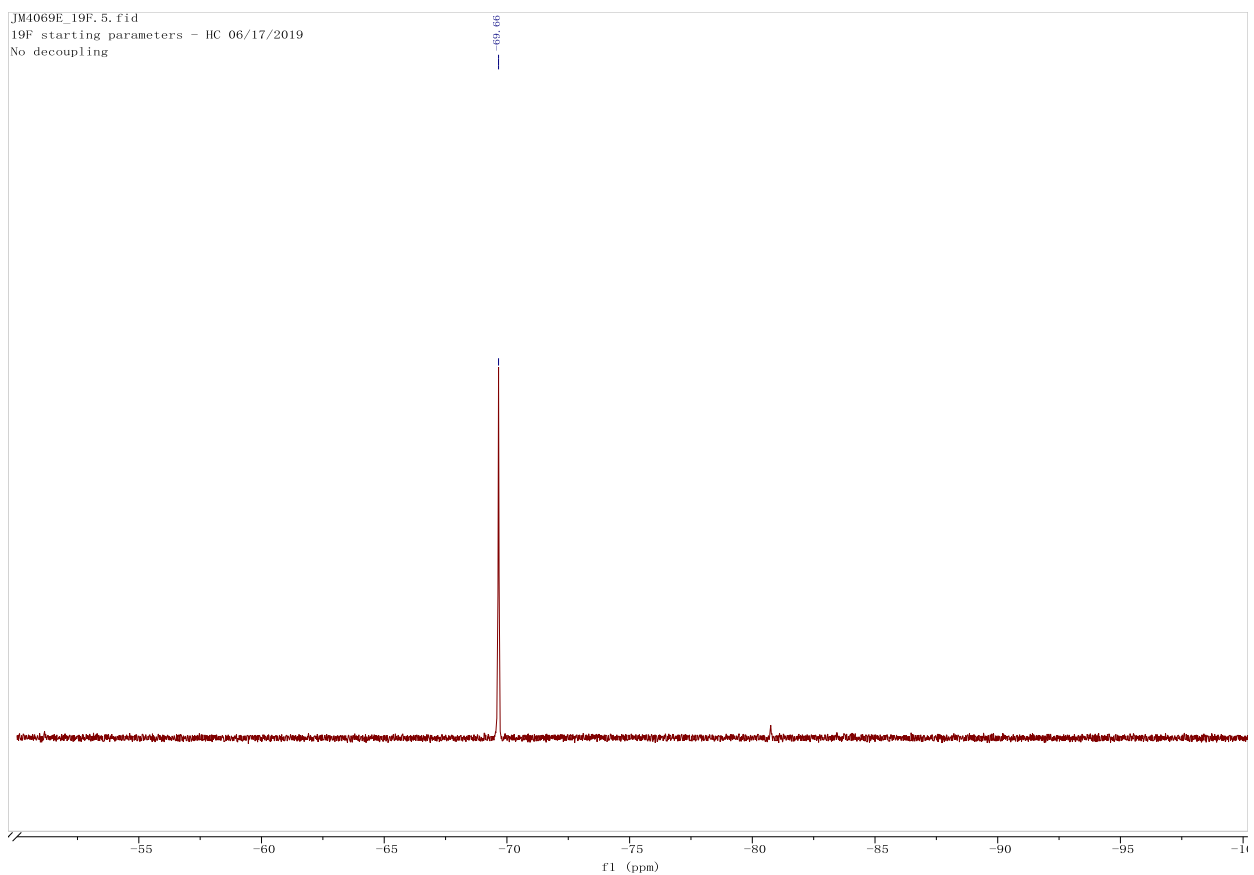

### Compound 3ib

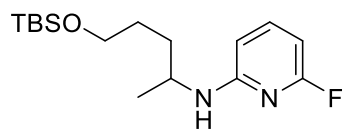

### <sup>1</sup>H NMR

JM4082B\_prod\_1H.1.fid  
Speedtype CC08050490  
1h.cocnmr.av600 CDCl3 /opt/nmrdata/u/ senjiema 8

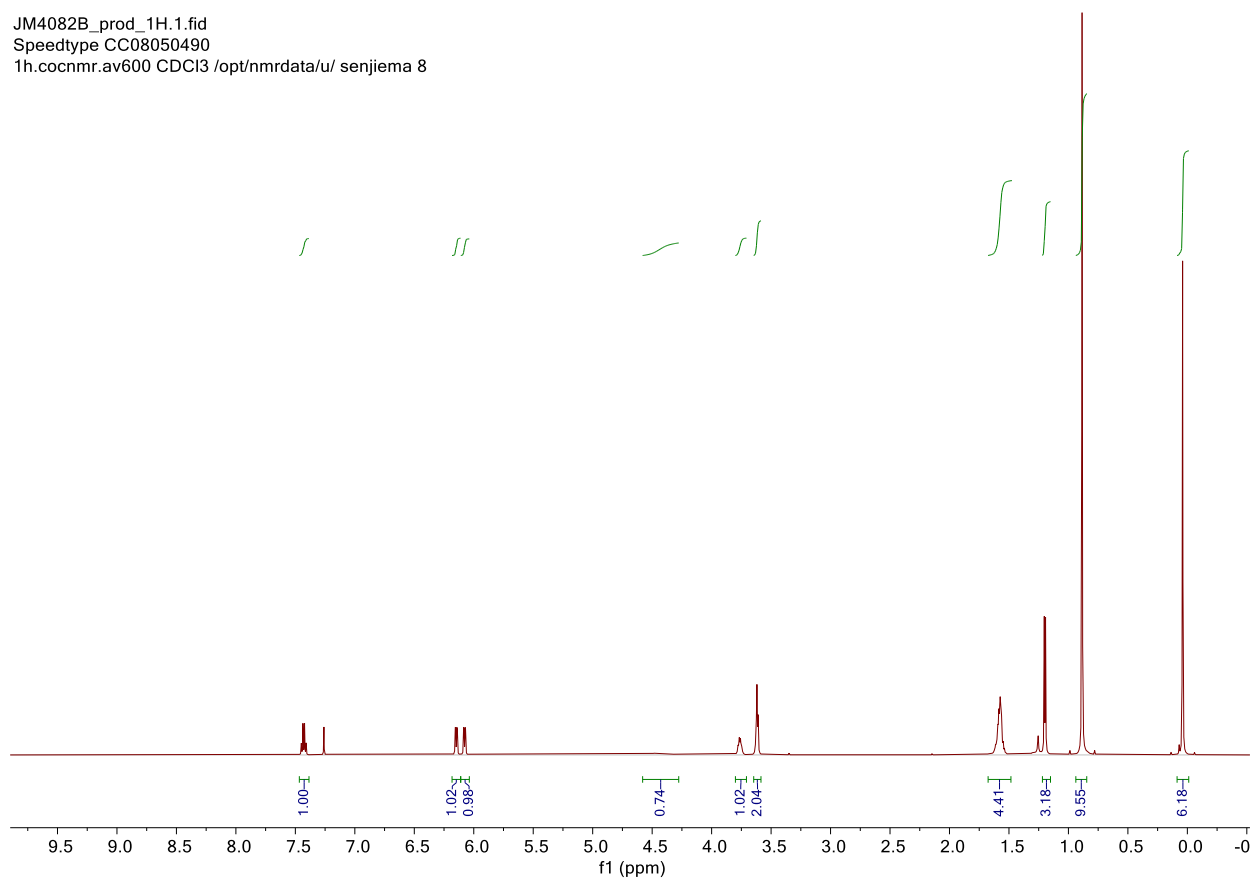

# <sup>13</sup>C NMR

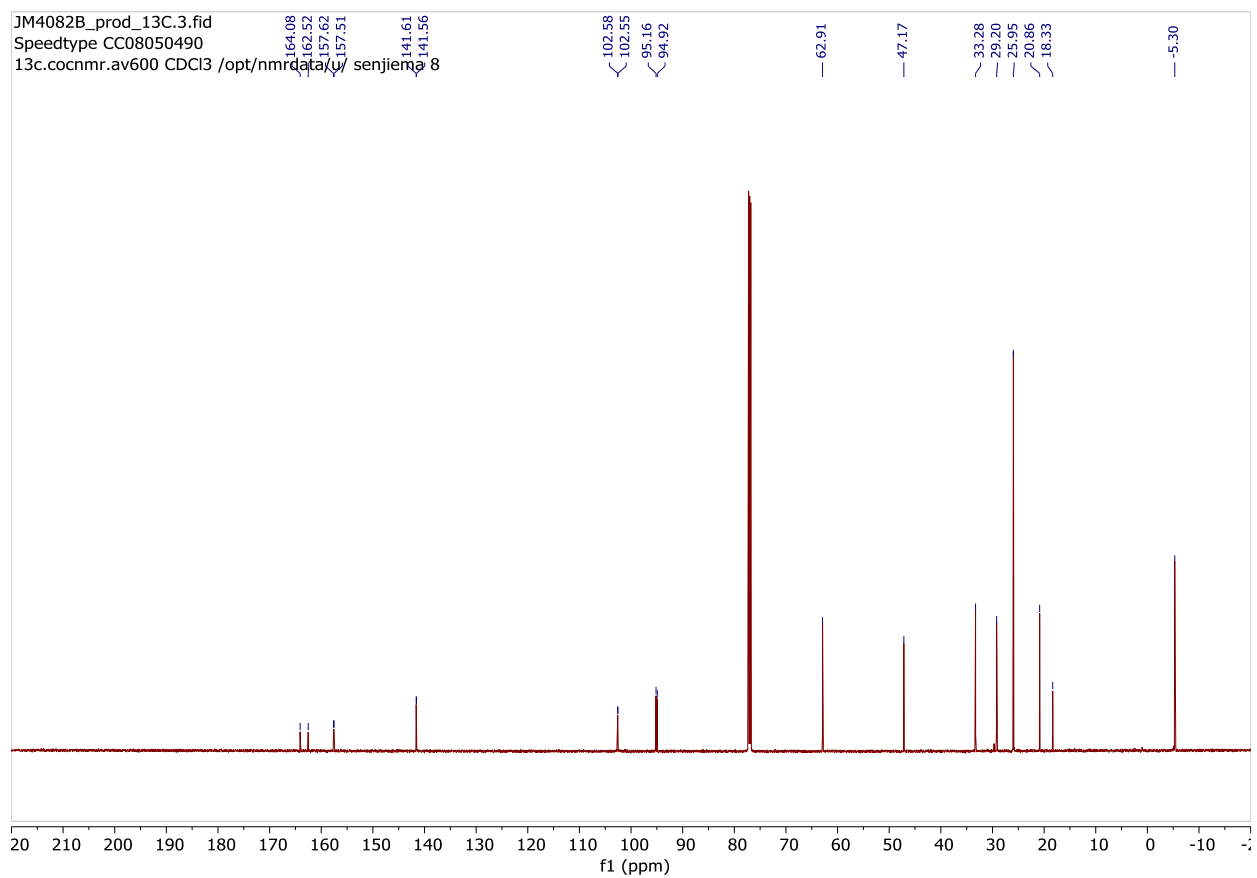

[Return to table of contents]

# <sup>19</sup>F NMR

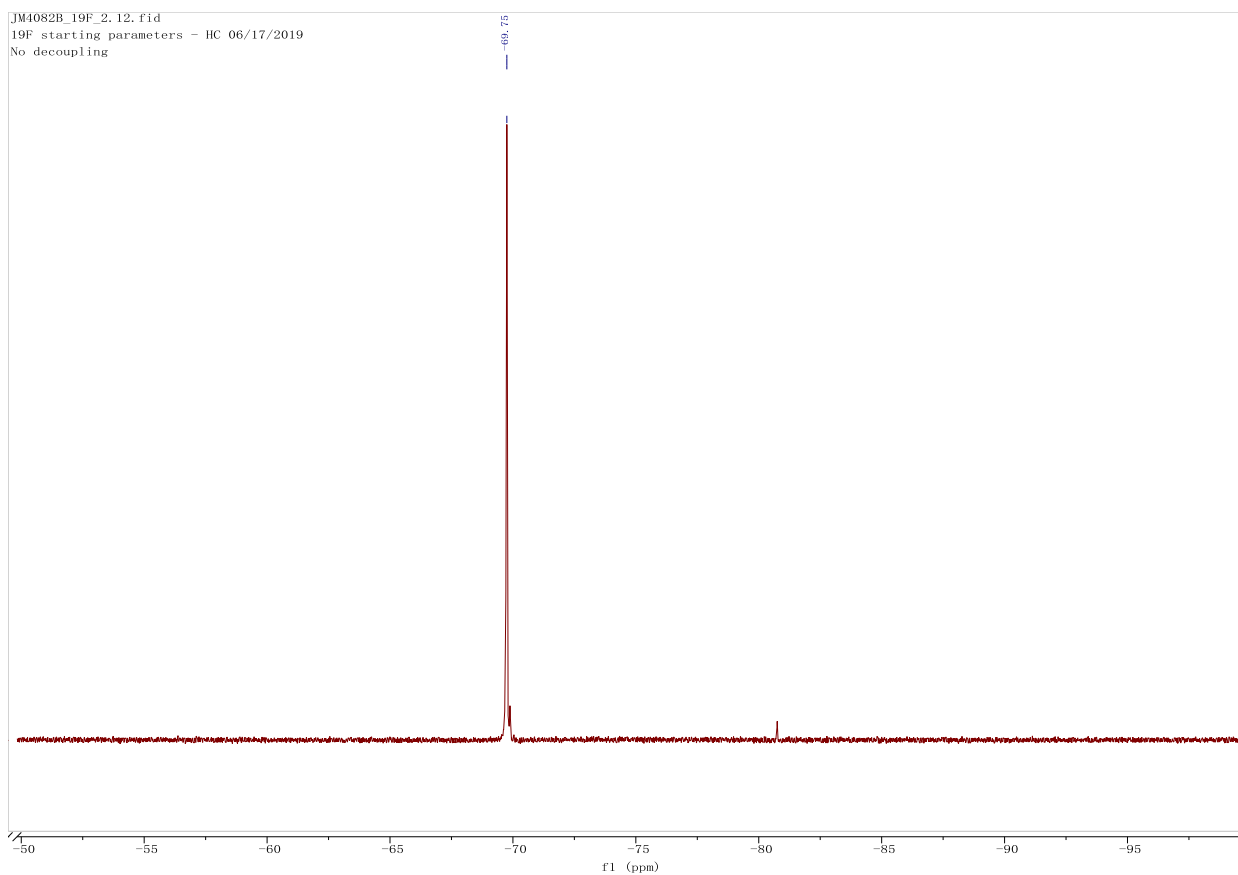

## Compound 3jb

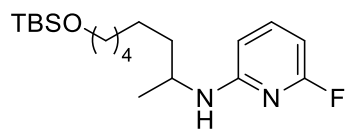

## <sup>1</sup>H NMR

JM4082C\_prod\_1H.1.fid  
Speedtype CC08050490  
1h.cocnmr.av600 CDCl3 /opt/nmrdata/u/ senjiema 9

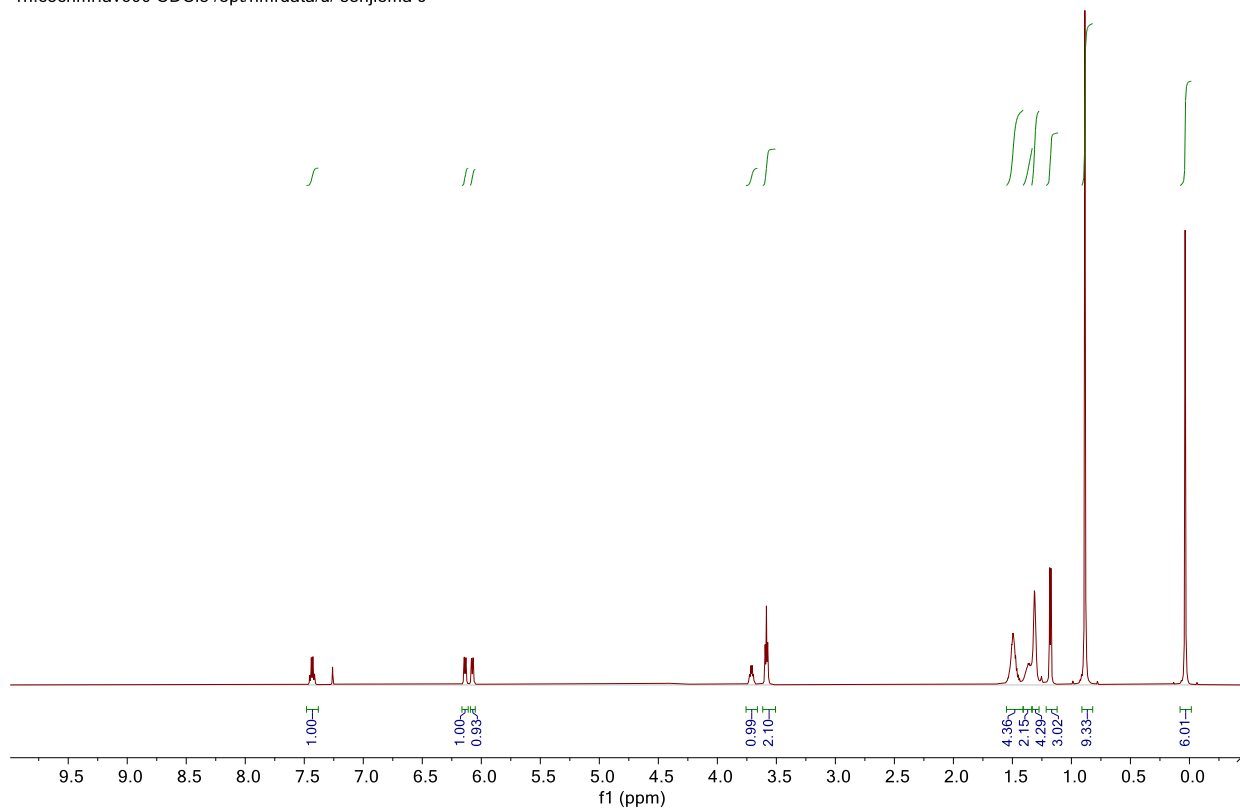

# <sup>13</sup>C NMR

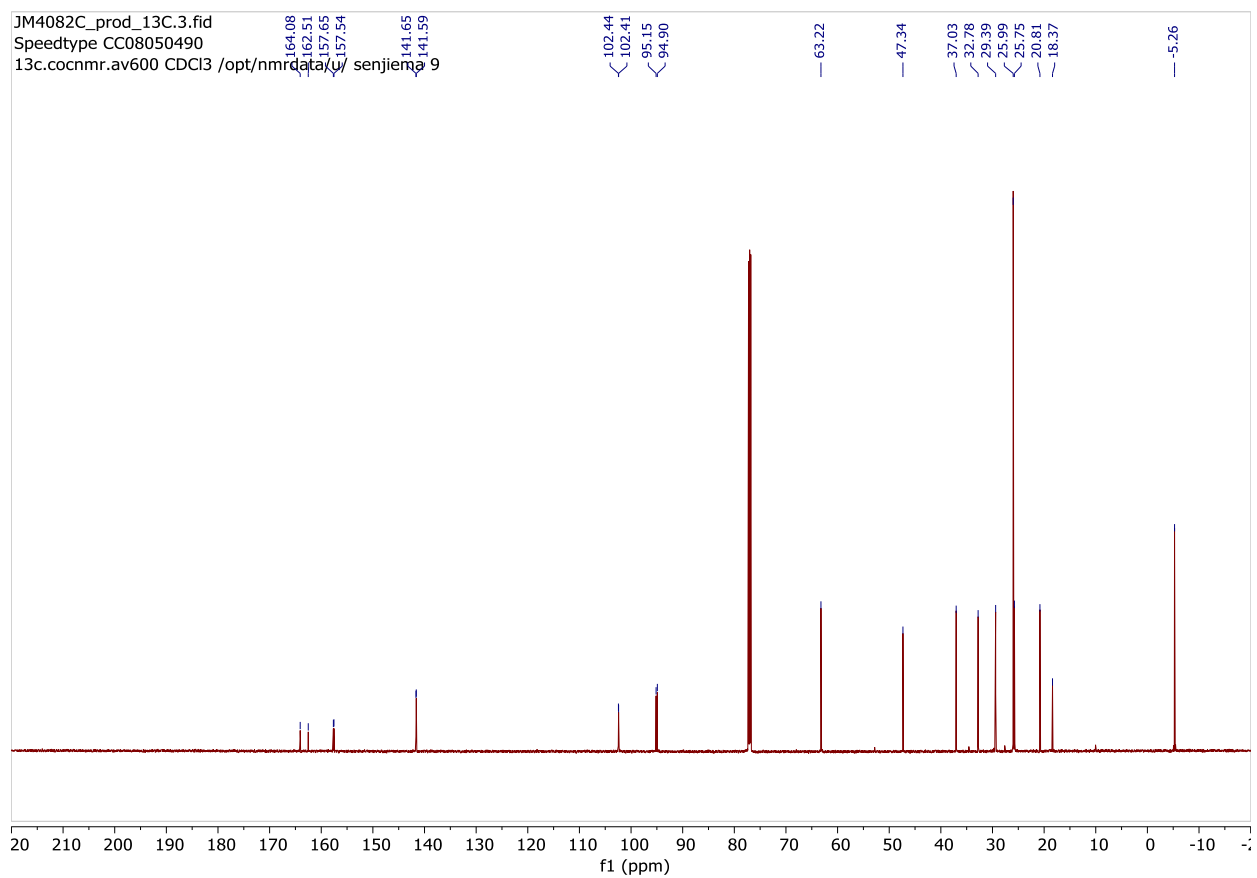



**<sup>19</sup>F NMR**

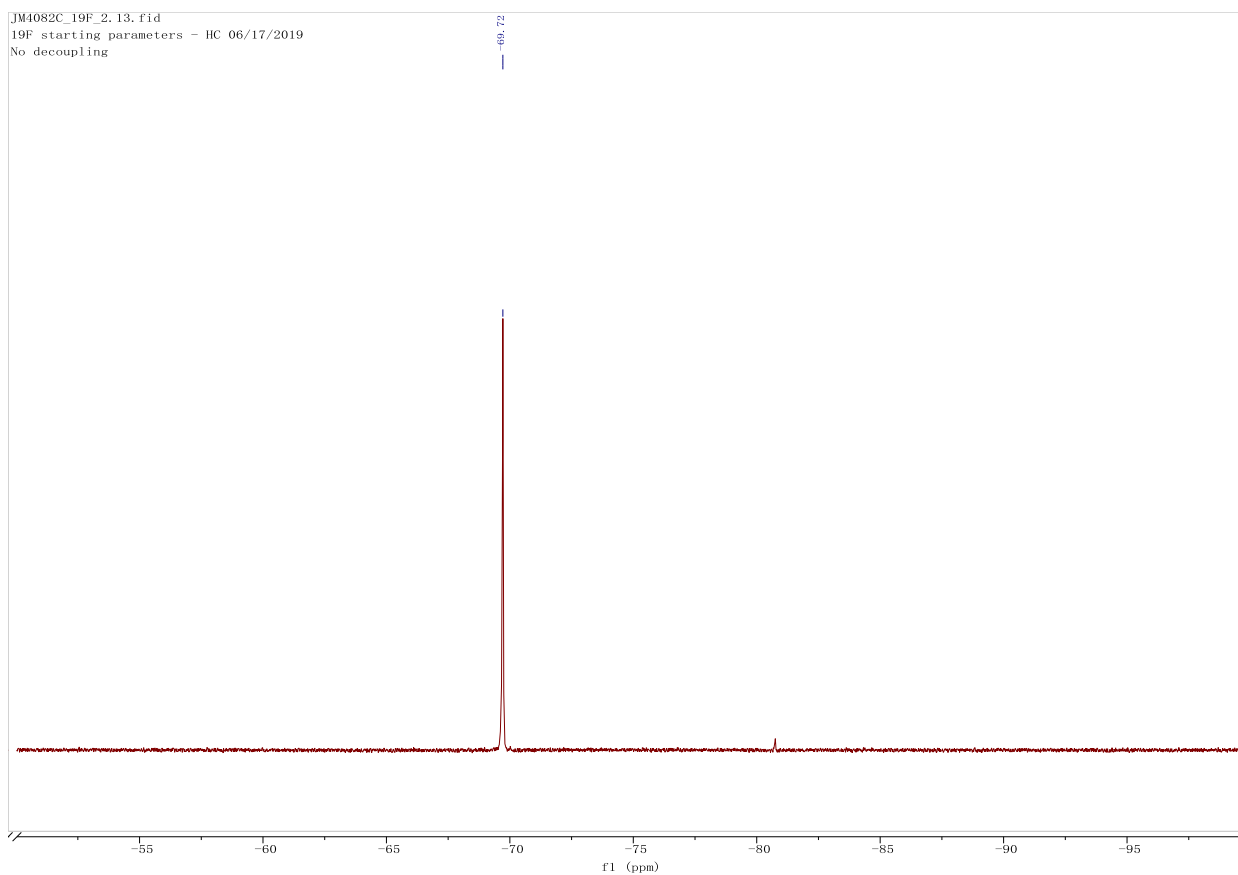

## Compound 3kb

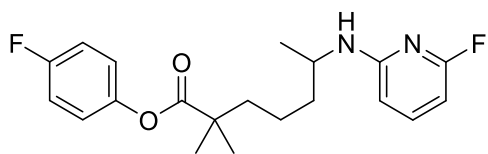

## <sup>1</sup>H NMR

JM4080A\_prod\_1H.1.fid  
1H starting parameters - HC 06/17/2019  
No decoupling

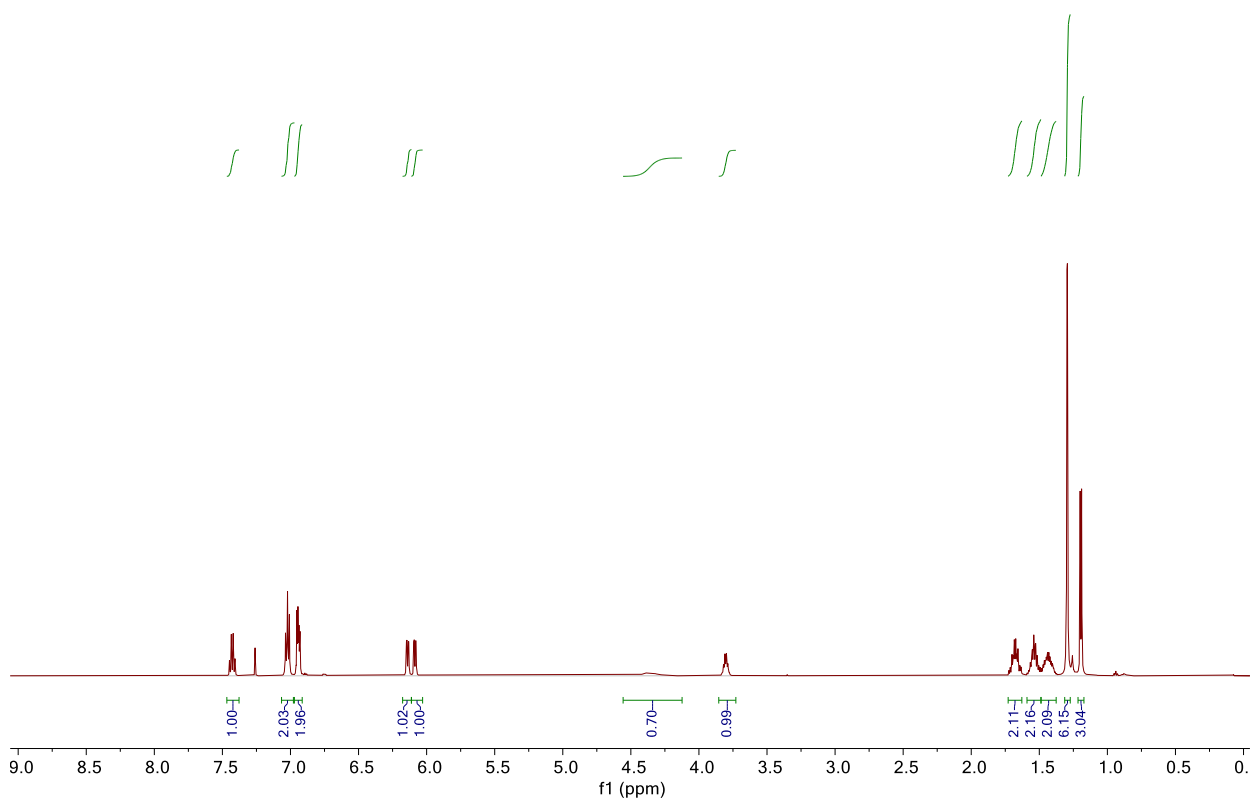

### <sup>13</sup>C NMR

JM4080A\_prod\_13C.2.f16  
1H starting parameters - 1H  
No decoupling

161.66  
160.08  
157.45  
157.22  
150.61  
146.92  
146.90  
141.78  
141.73

123.01  
122.95  
116.19  
116.04

102.82  
102.79  
95.43  
95.18

47.13  
42.73  
40.61  
37.58

25.25  
21.66  
21.04

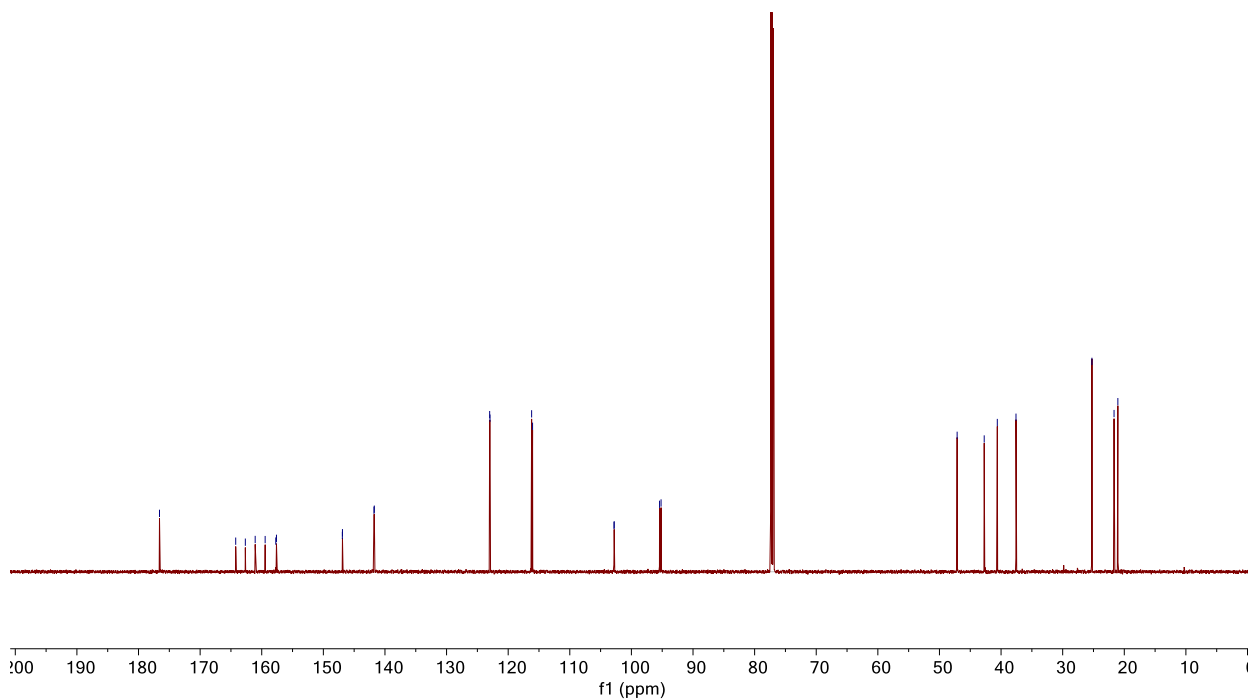

**<sup>19</sup>F NMR**

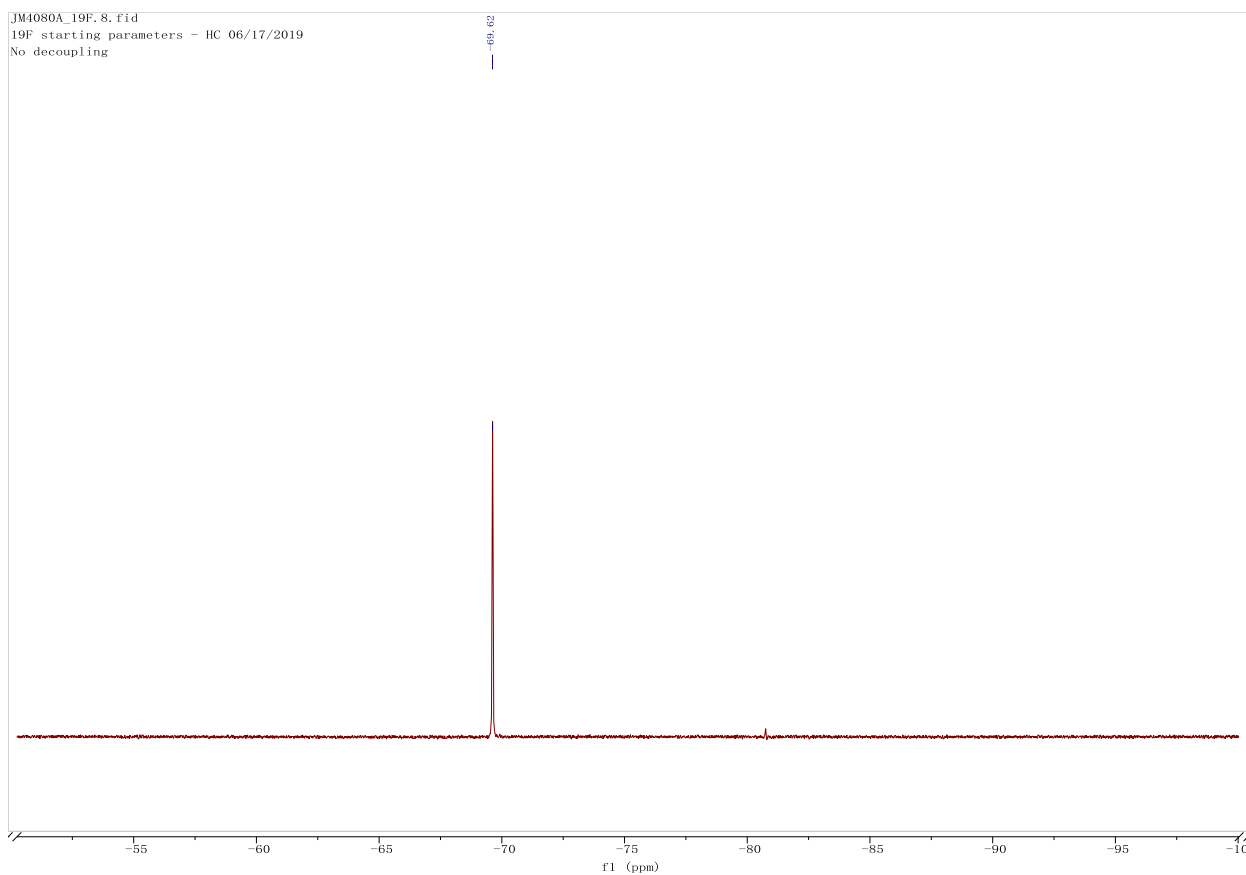

### Compound 3lb

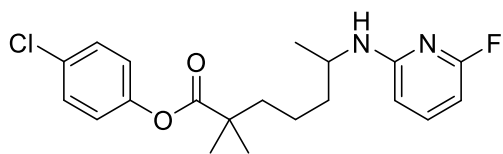

### <sup>1</sup>H NMR

JM4087A\_prod\_1H.3.fid  
1H starting parameters - HC 06/17/2019  
No decoupling

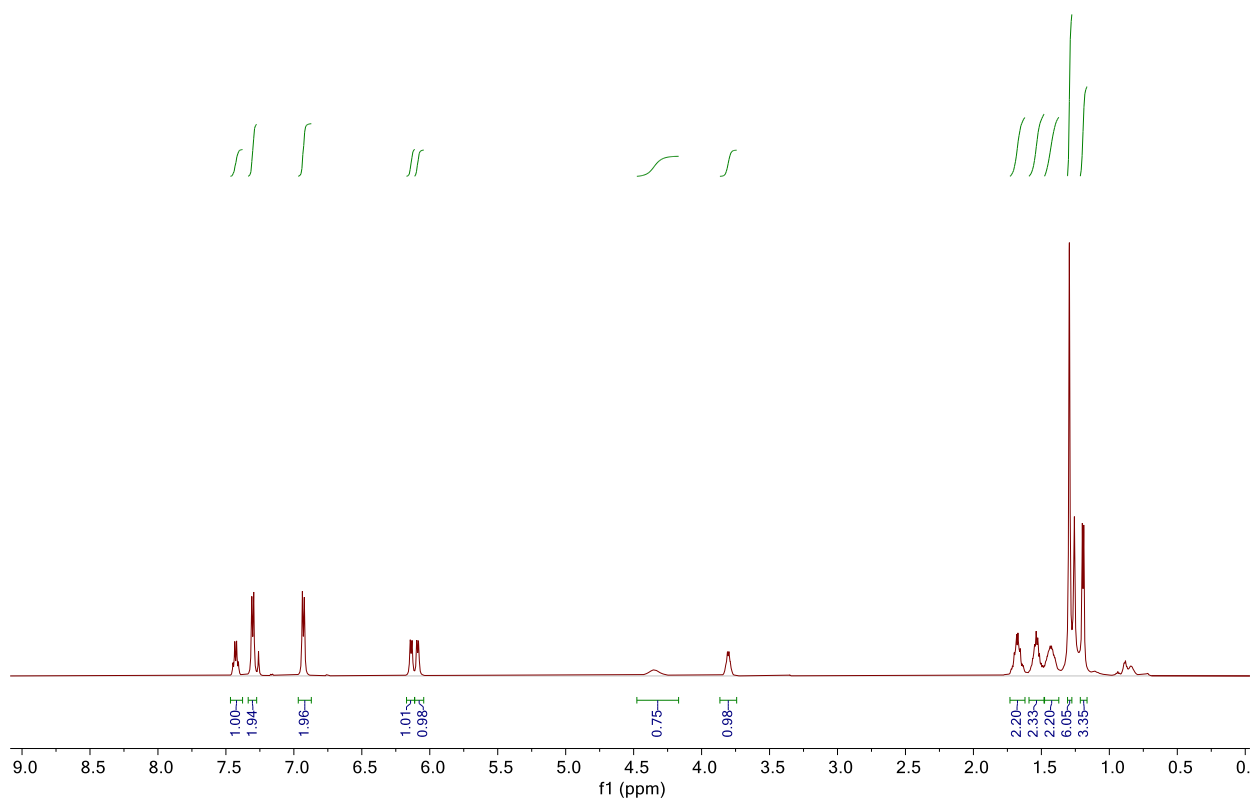

# <sup>13</sup>C NMR

JM4087A\_prod\_13C\_4.fid  
1H starting parameters - HC-06172019  
No decoupling

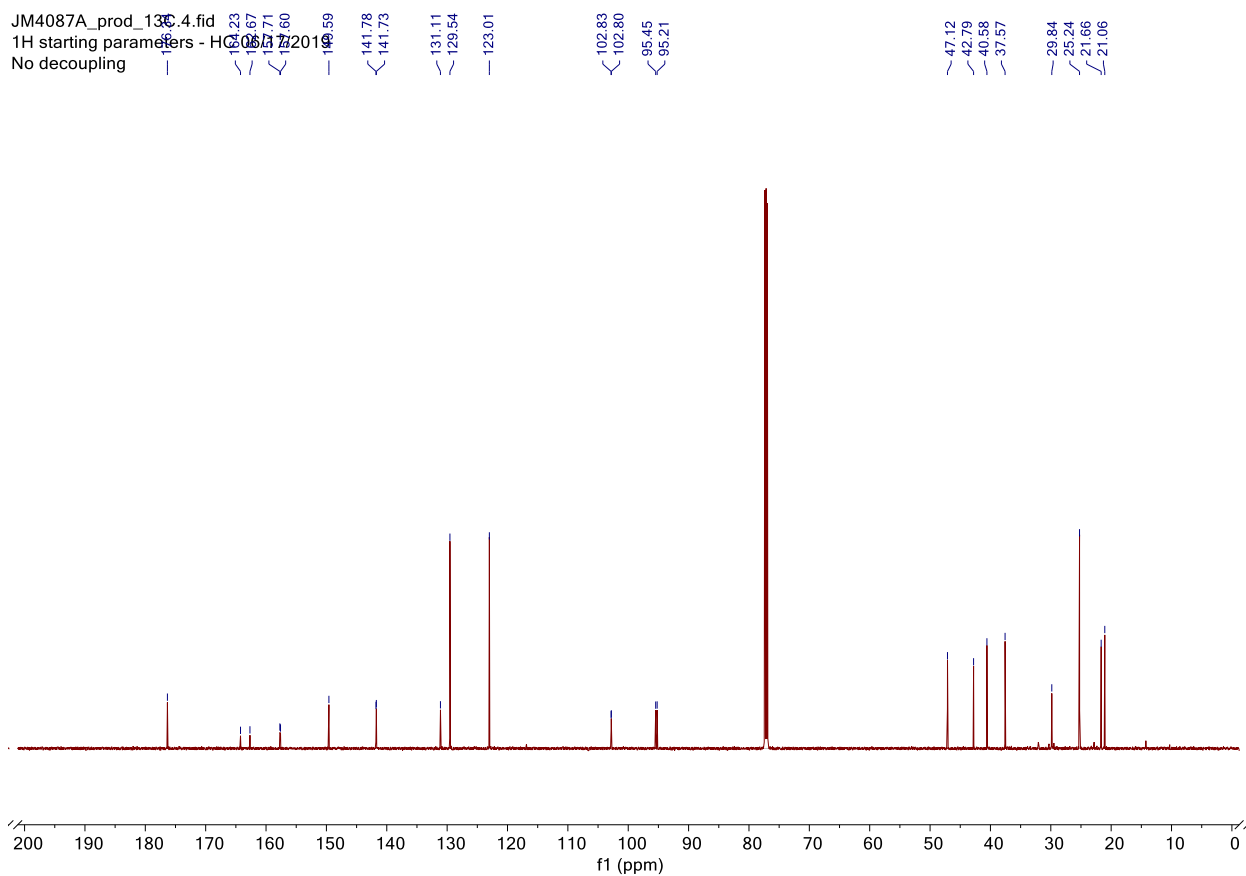

[Return to table of contents]

# <sup>19</sup>F NMR

JM4087A\_19F.3.fid  
1H starting parameters - HC 06/17/2019  
No decoupling

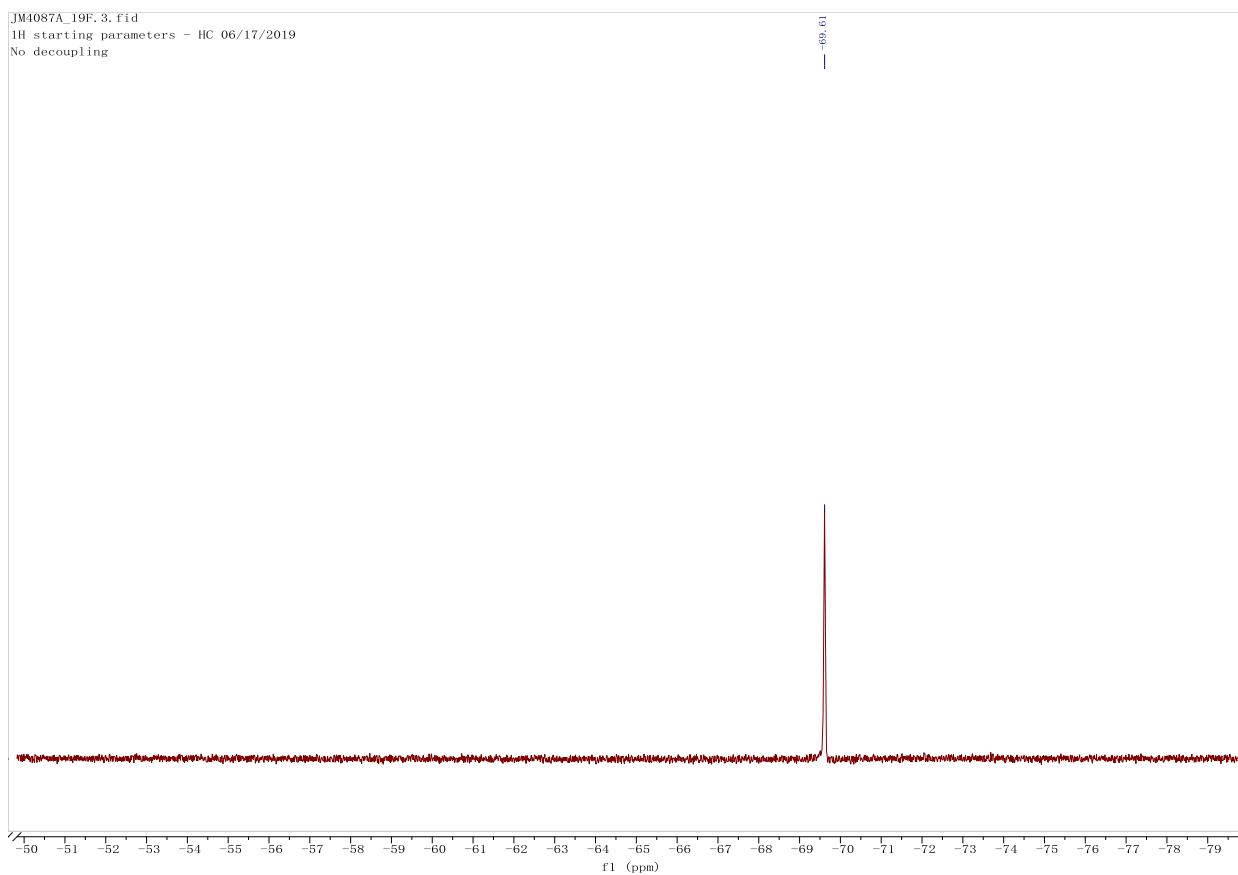

## Compound 3mb

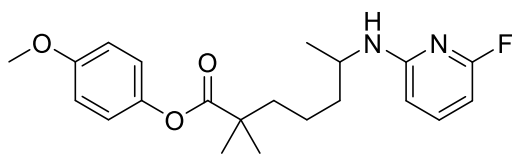

## <sup>1</sup>H NMR

JM4080B\_prod\_1H.1.fid  
Speedtype CC08050490  
1h.cocnmr.av600 CDCl3 /opt/nmrdata/u/ senjiema 6

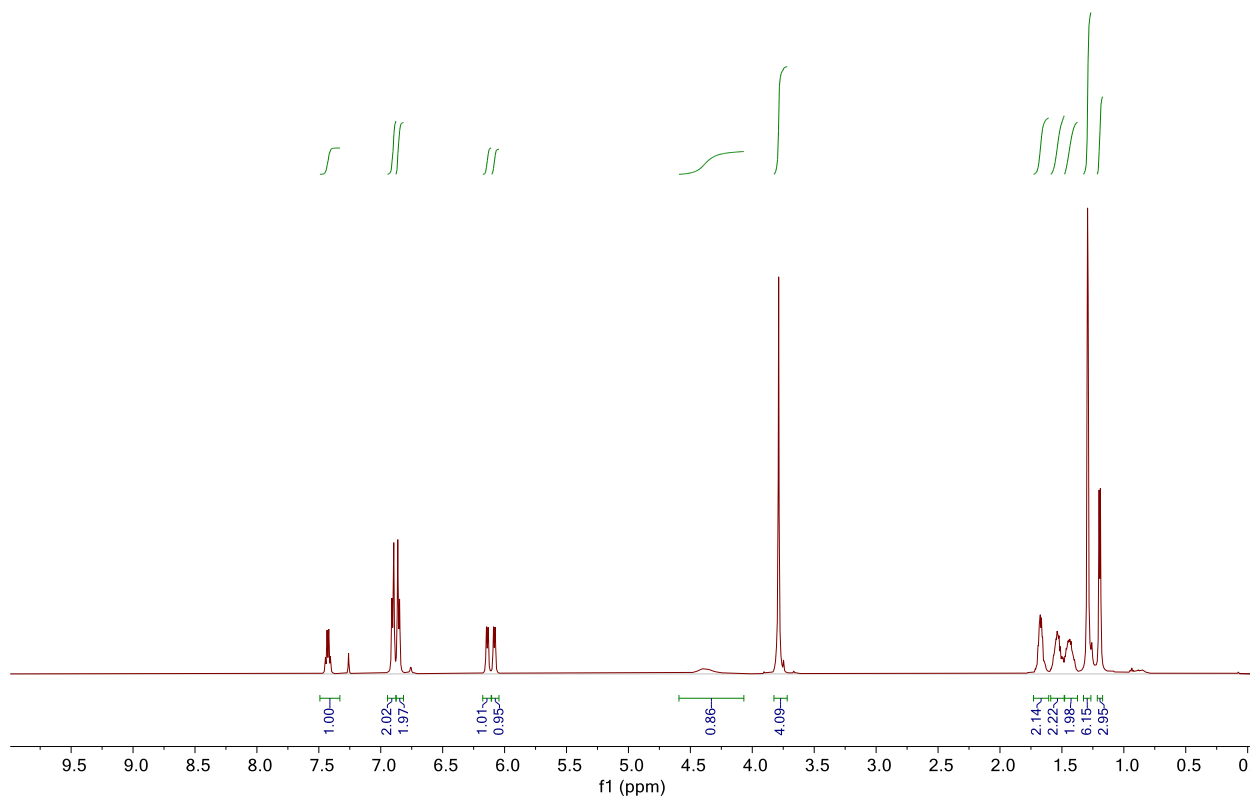



### <sup>13</sup>C NMR

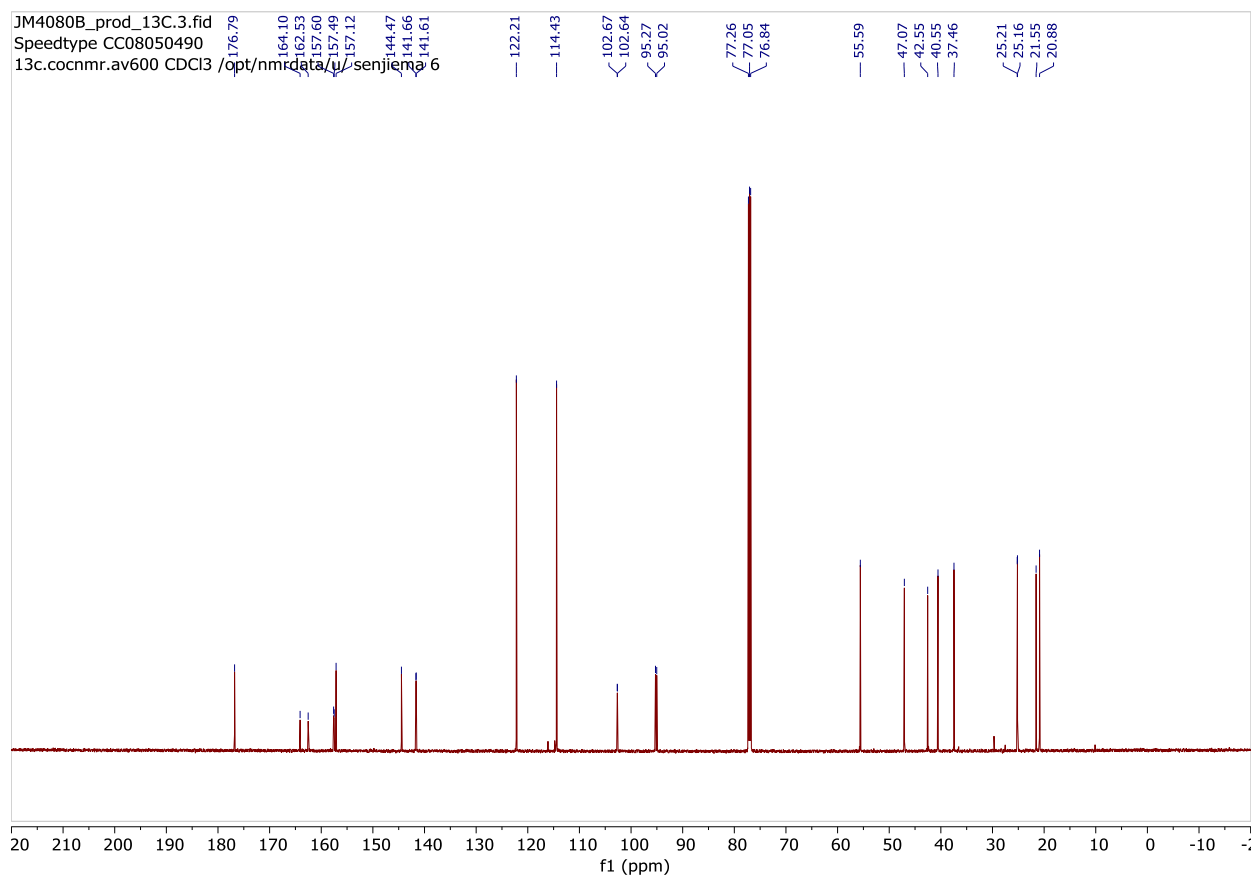

[Return to table of contents]

# <sup>19</sup>F NMR

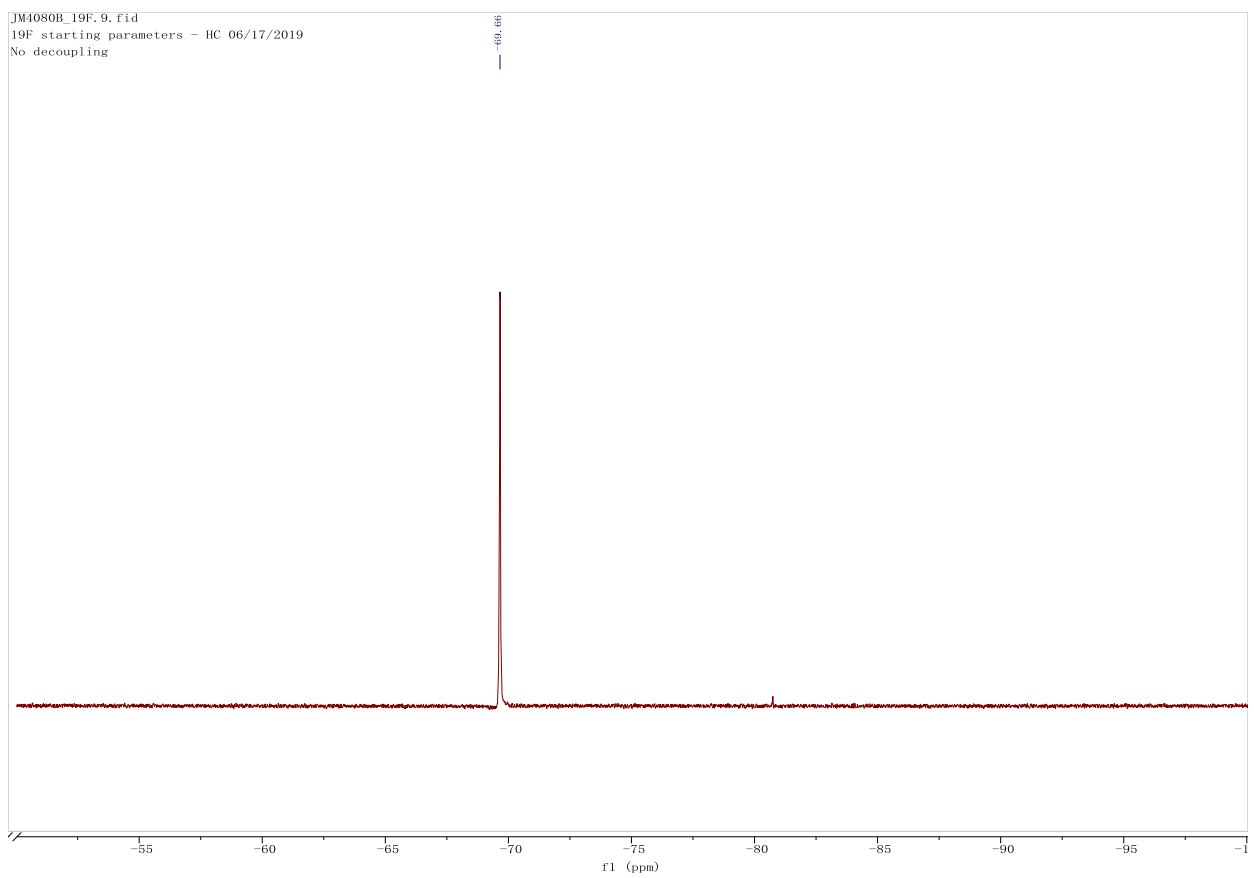

## Compound 3nb

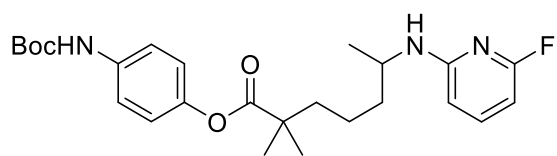

## <sup>1</sup>H NMR

JM4086A\_prod\_1H.1.fid  
Speedtype CC08050490  
1h.cocnmr.av600 CDCl3 /opt/nmrdata/u/ senjiema 11

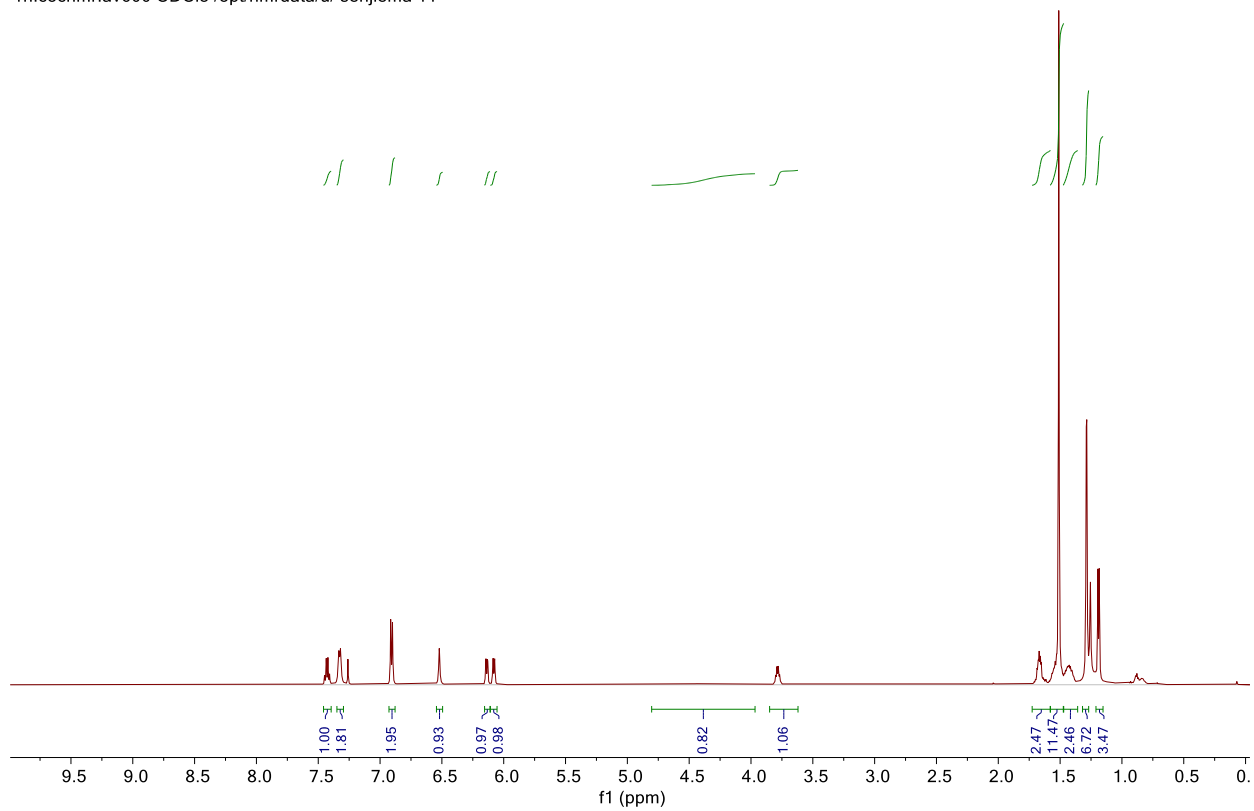

# <sup>13</sup>C NMR

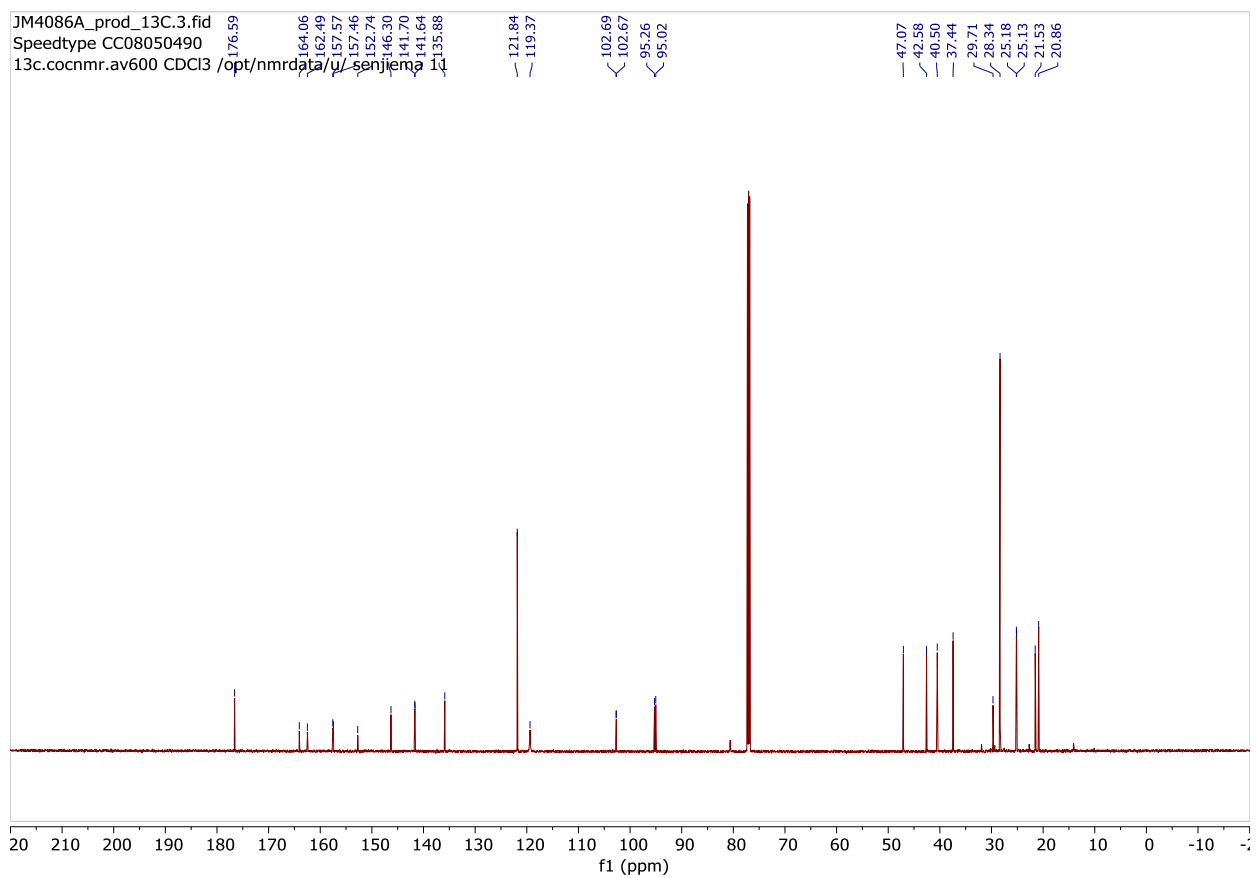

[Return to table of contents]

# <sup>19</sup>F NMR

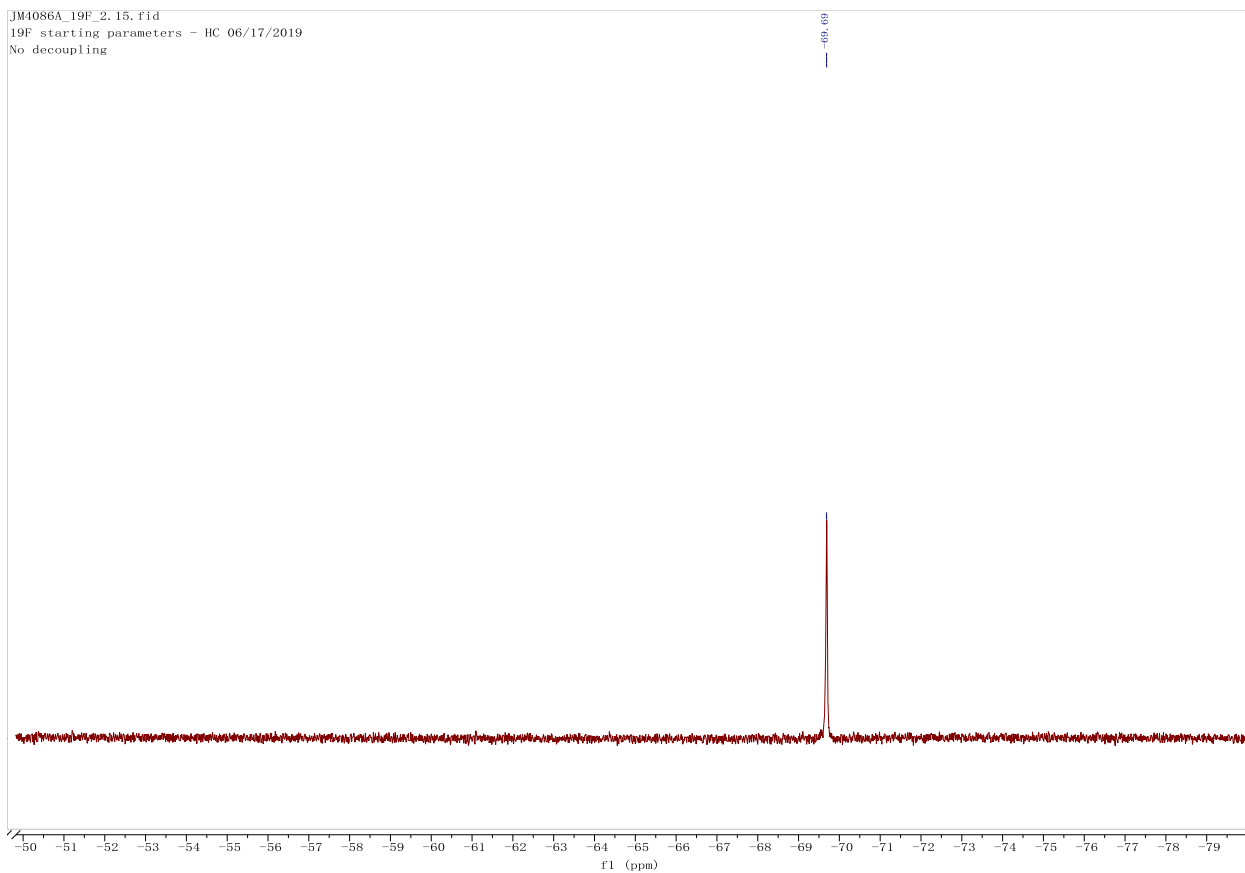

### Compound 3ob

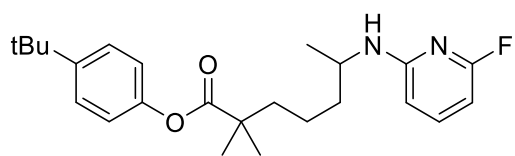

### <sup>1</sup>H NMR

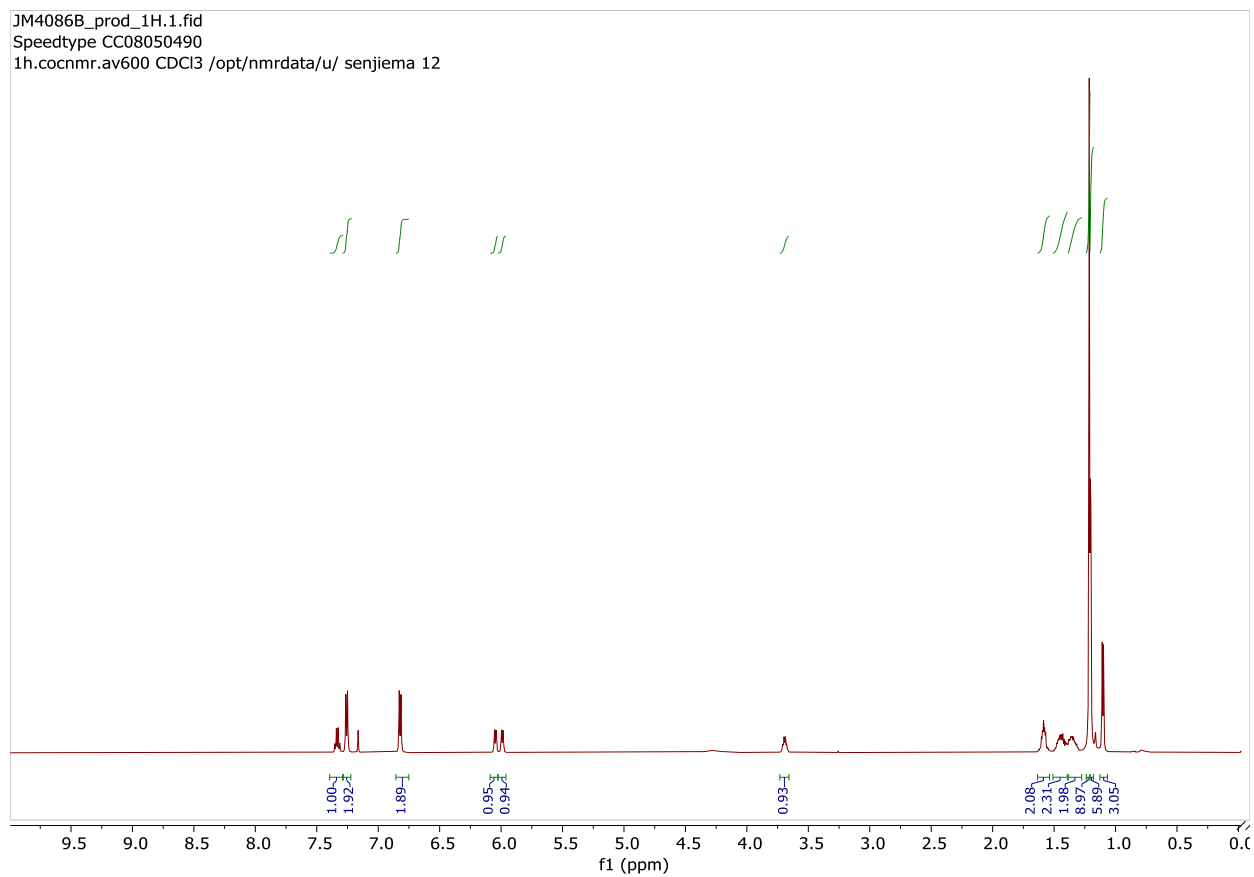

**<sup>13</sup>C NMR**

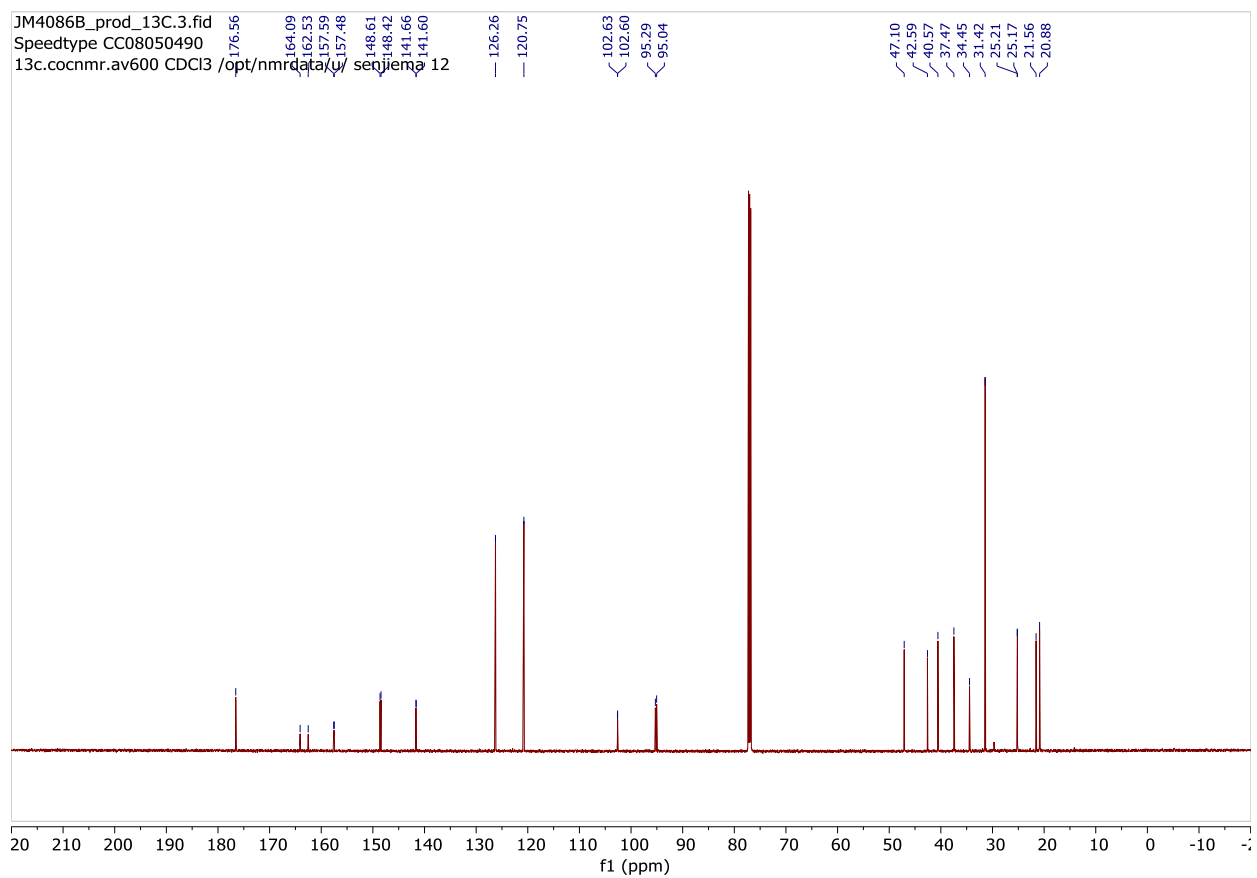

[Return to table of contents]

# <sup>19</sup>F NMR

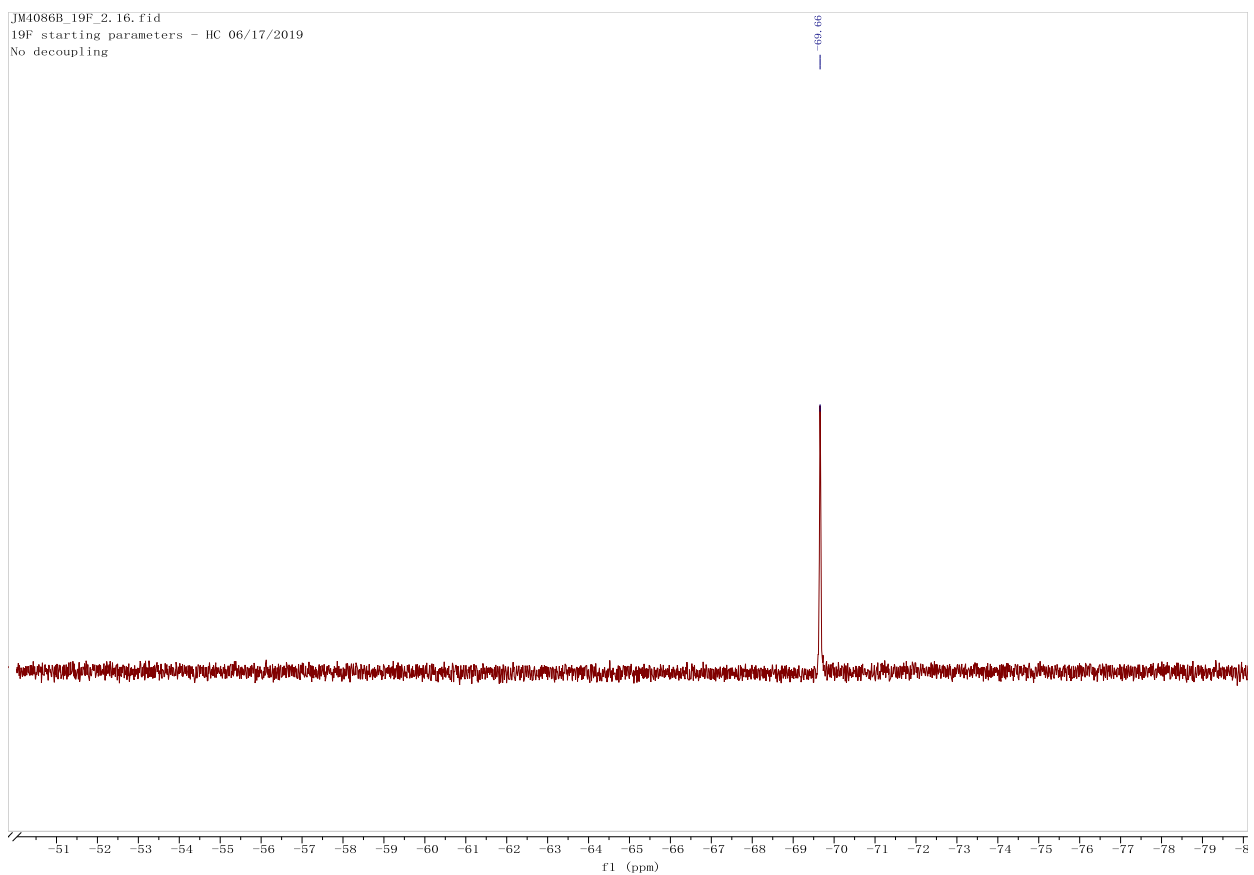



### Compound 3pb

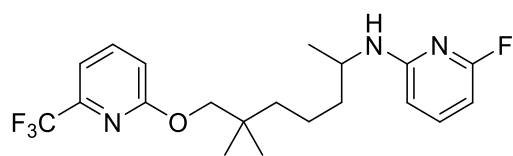

### <sup>1</sup>H NMR

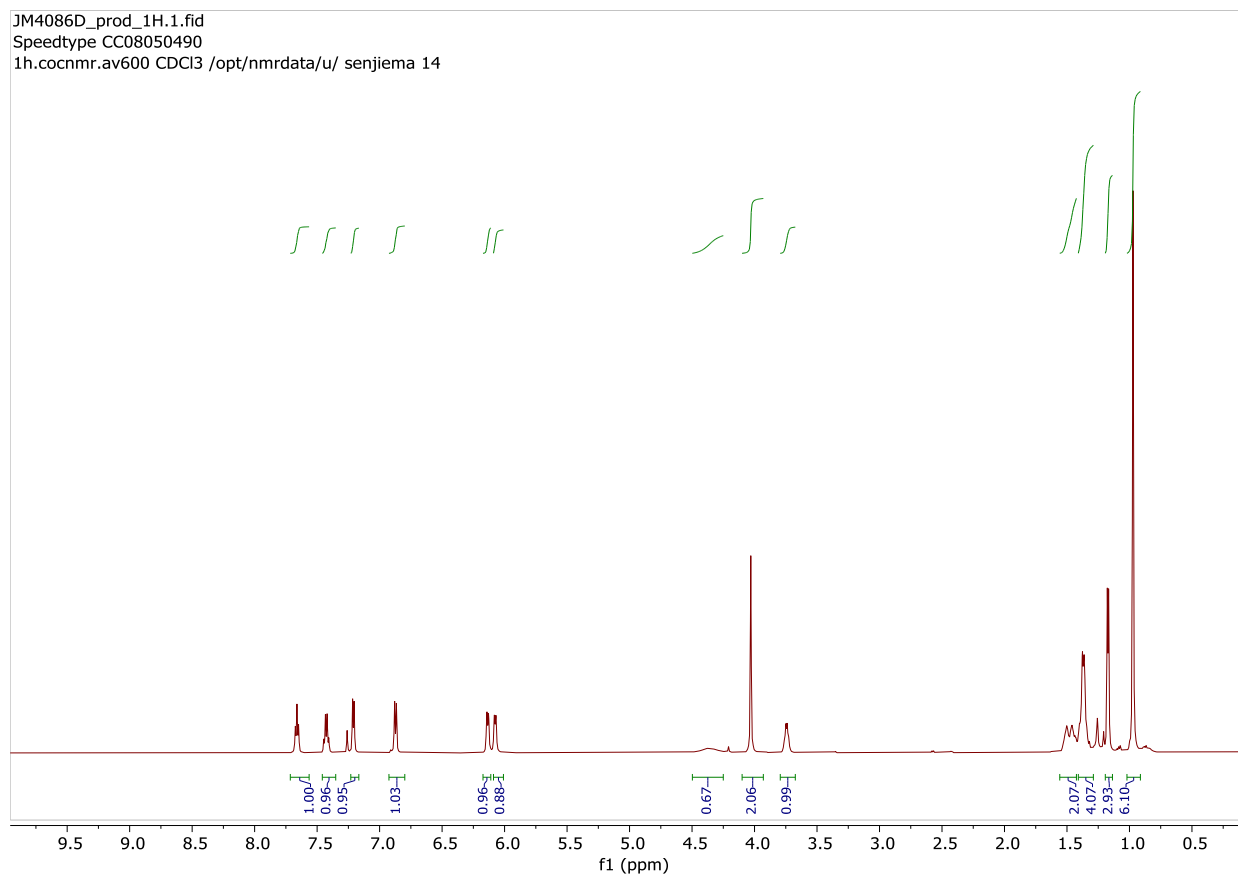

**<sup>13</sup>C NMR**

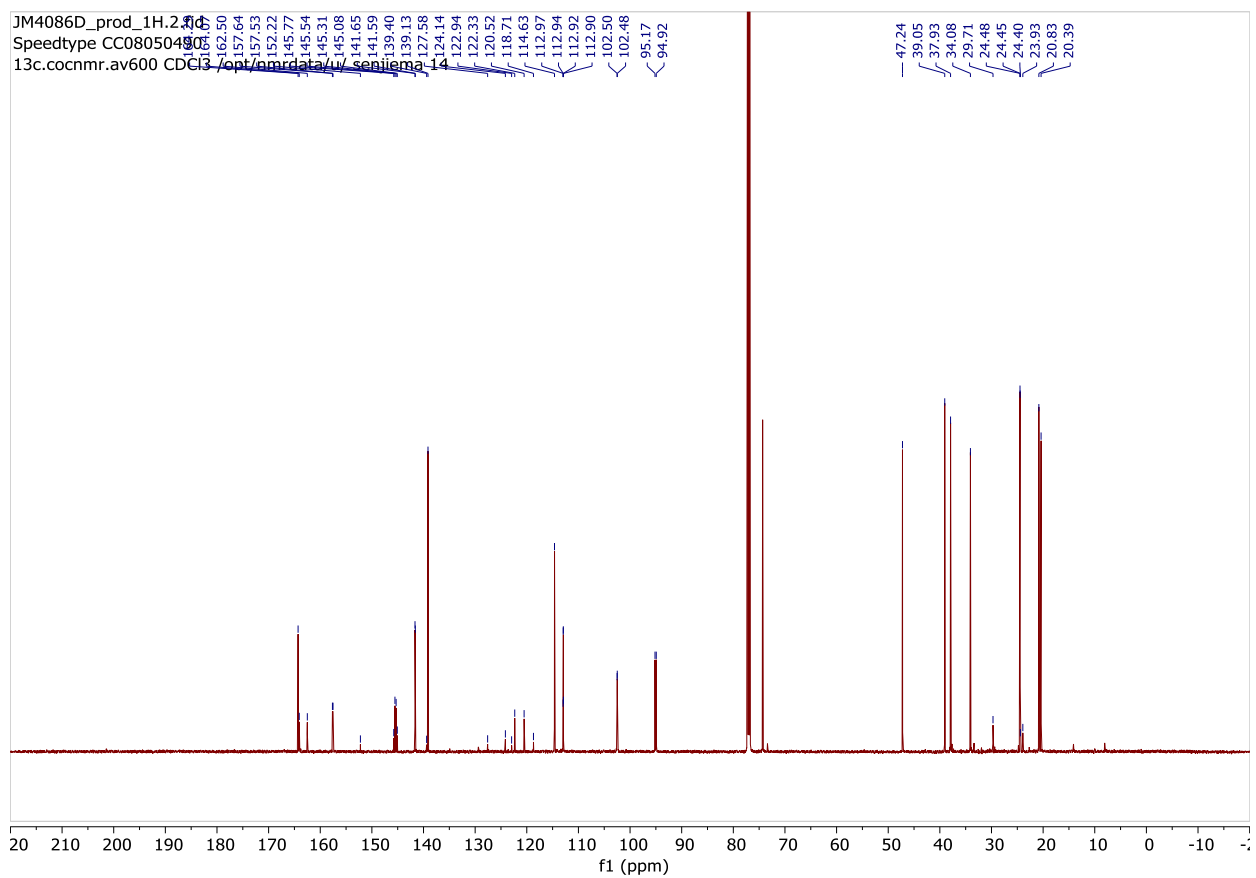

**<sup>19</sup>F NMR**

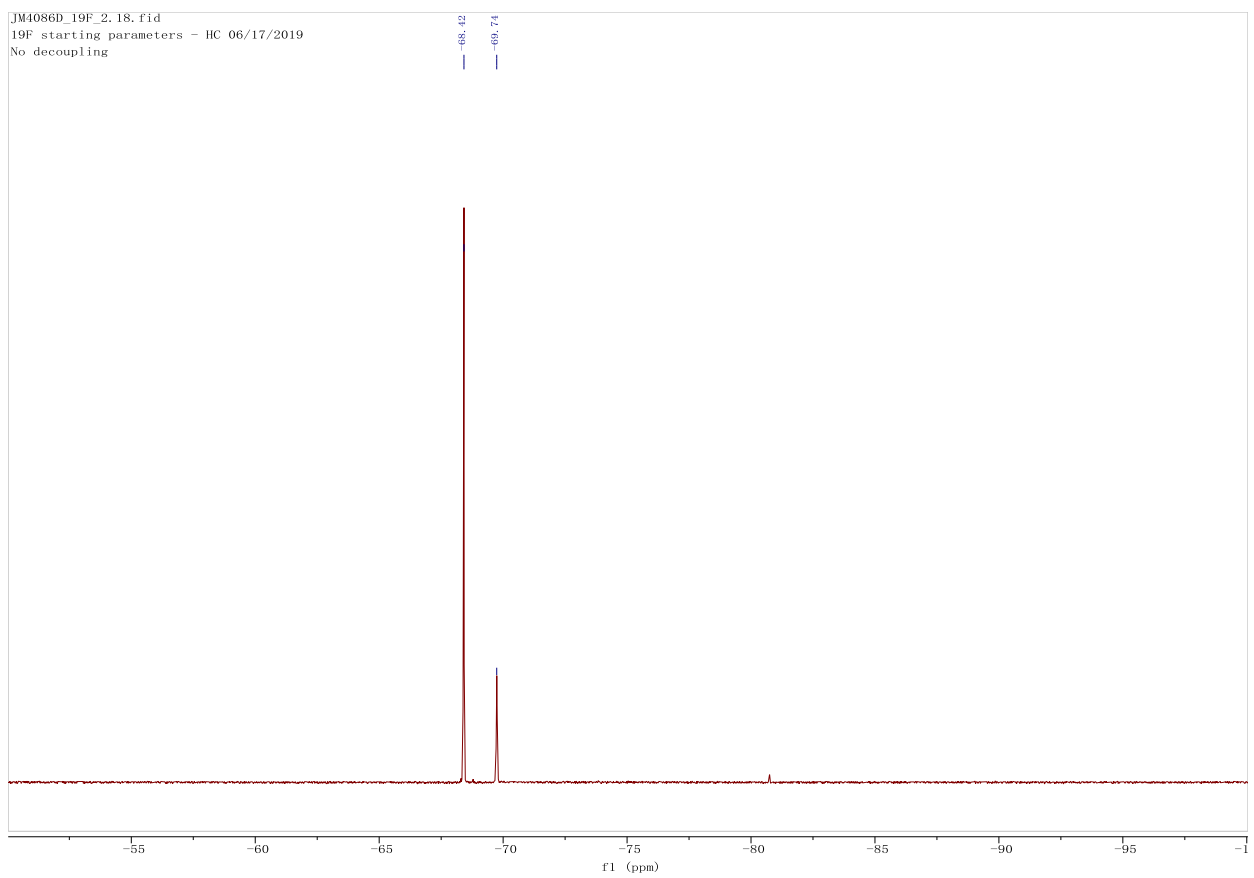

## Compound 3qb

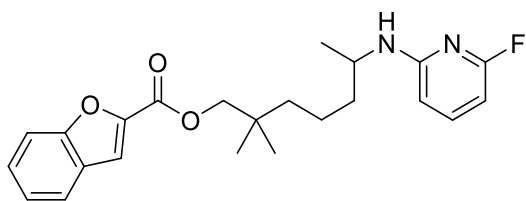

## <sup>1</sup>H NMR

JM4080E\_prod\_1H.1.fid  
Speedtype CC08050490  
1h.cocnmr.av600 CDCl3 /opt/nmrdata/u/ senjiema 7

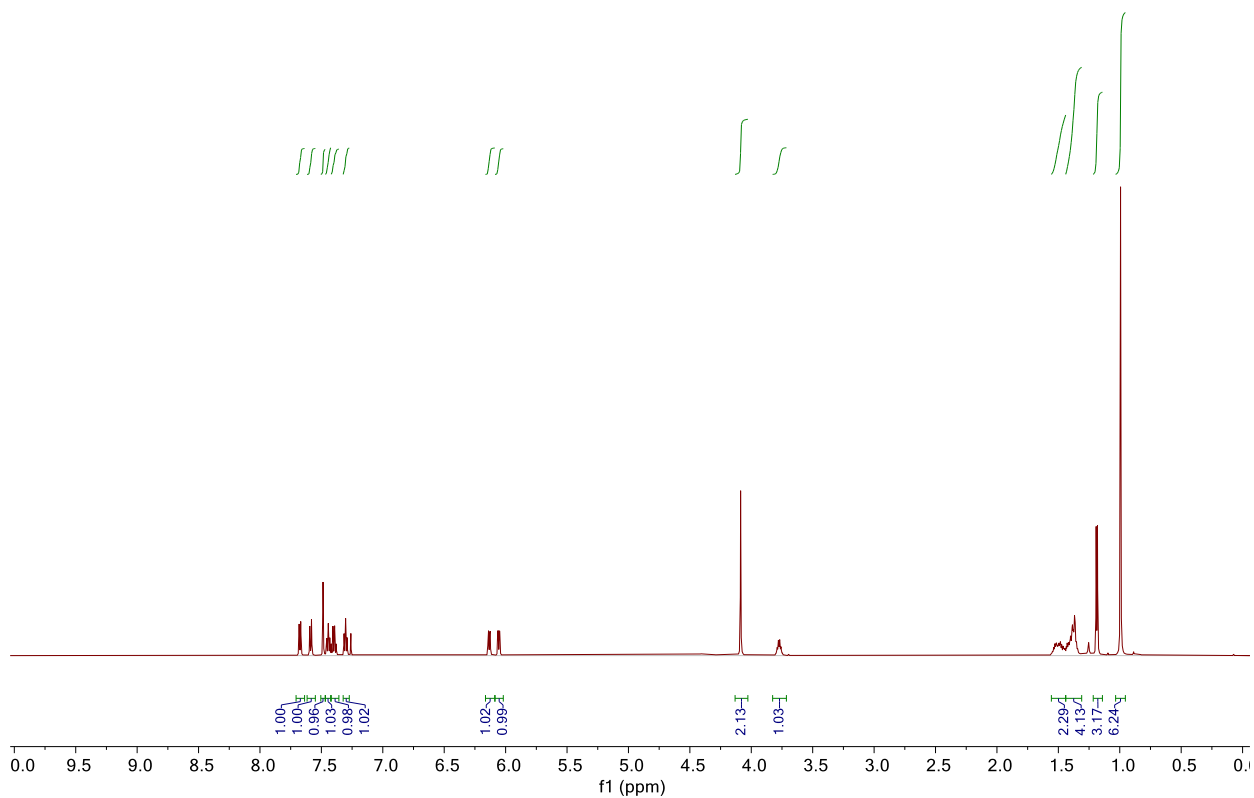

# <sup>13</sup>C NMR

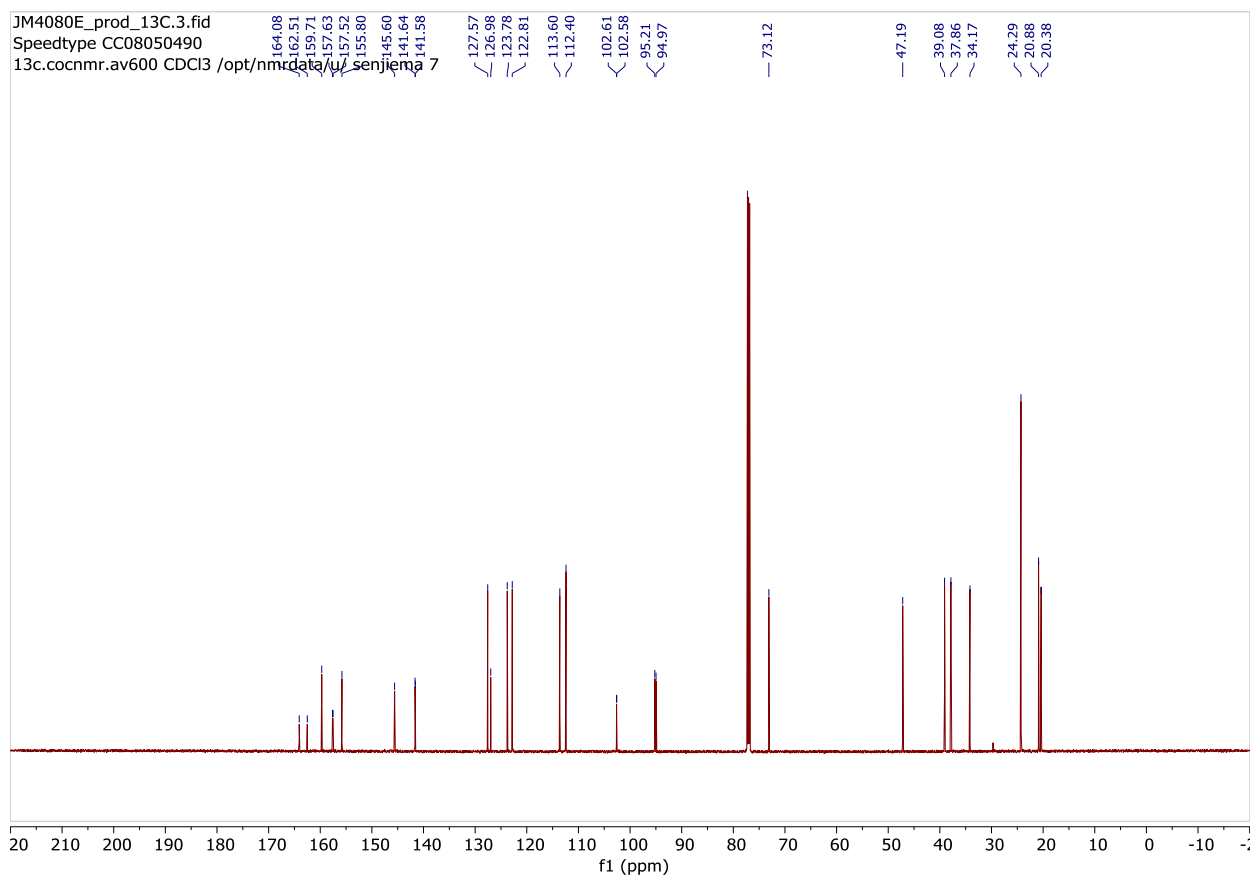

**<sup>19</sup>F NMR**

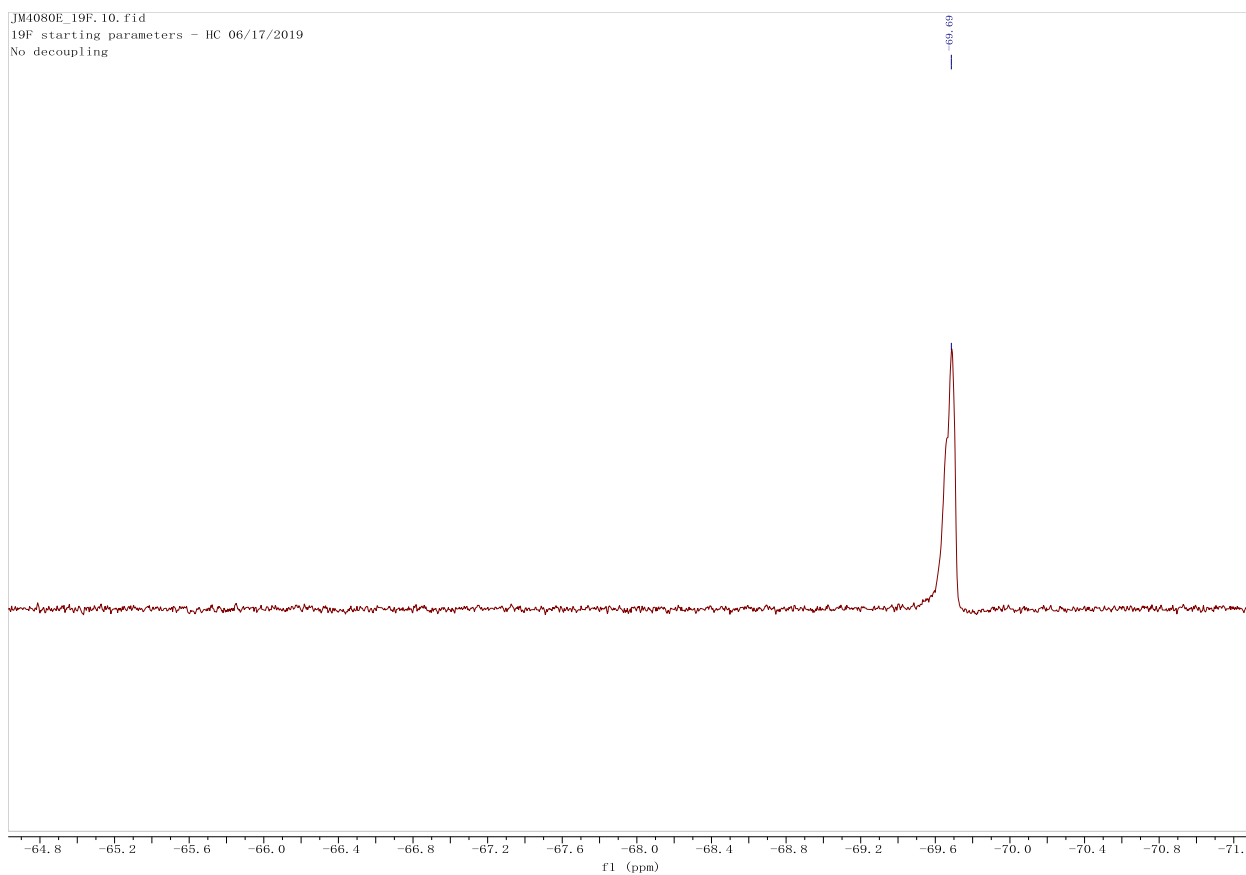

## Compound 3rb

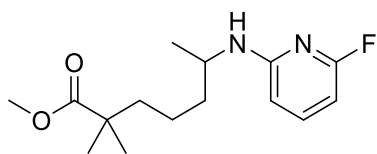

## <sup>1</sup>H NMR

JM4074A\_prod\_1H.1.fid  
Speedtype CC08050490  
1h.cocnmr.av600 CDCl<sub>3</sub> /opt/nmrdata/u/ senjiema 4

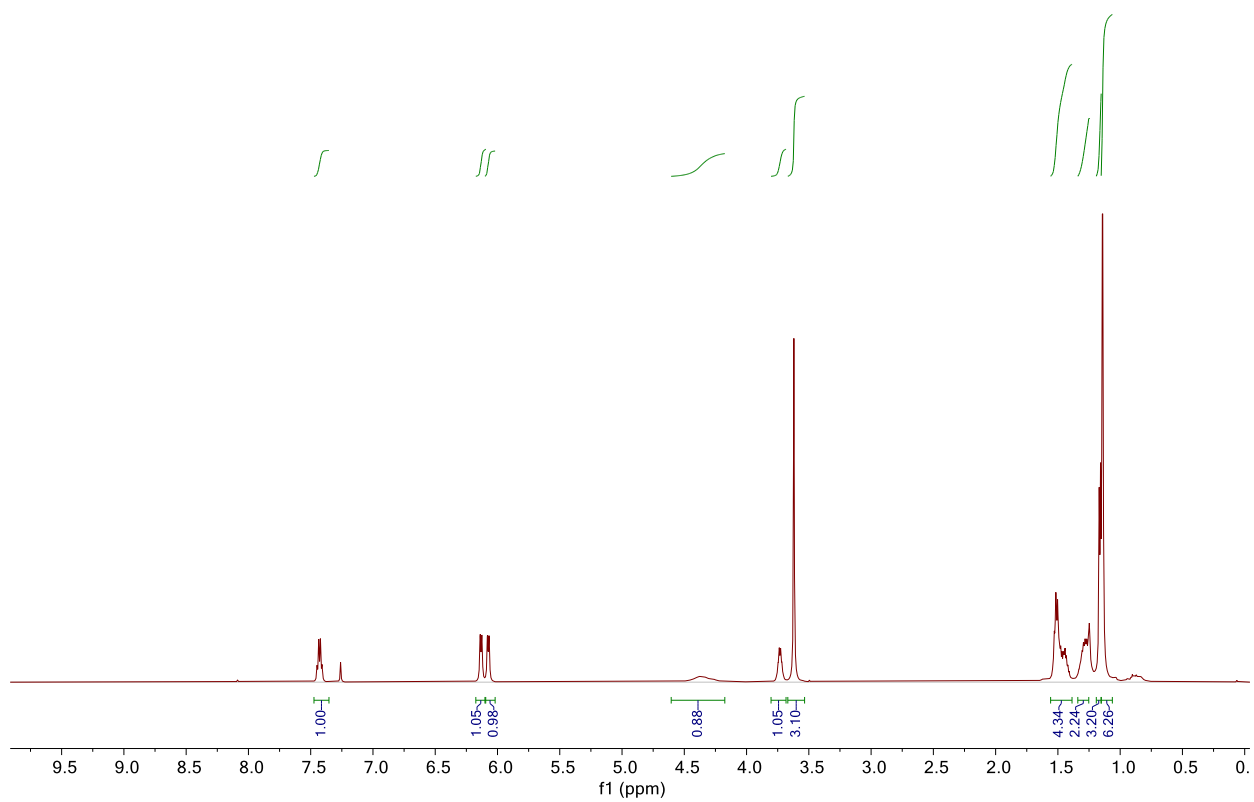

### <sup>13</sup>C NMR

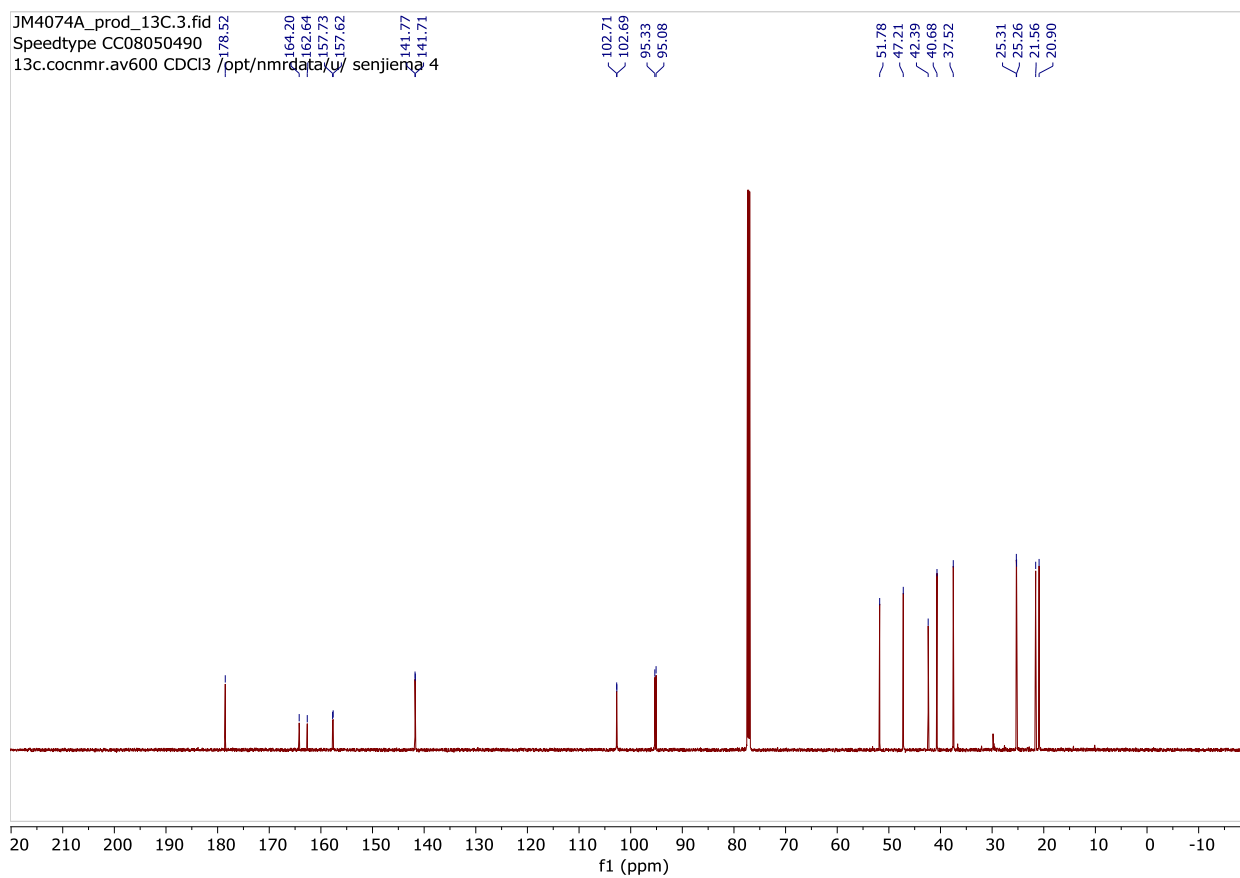



# <sup>19</sup>F NMR

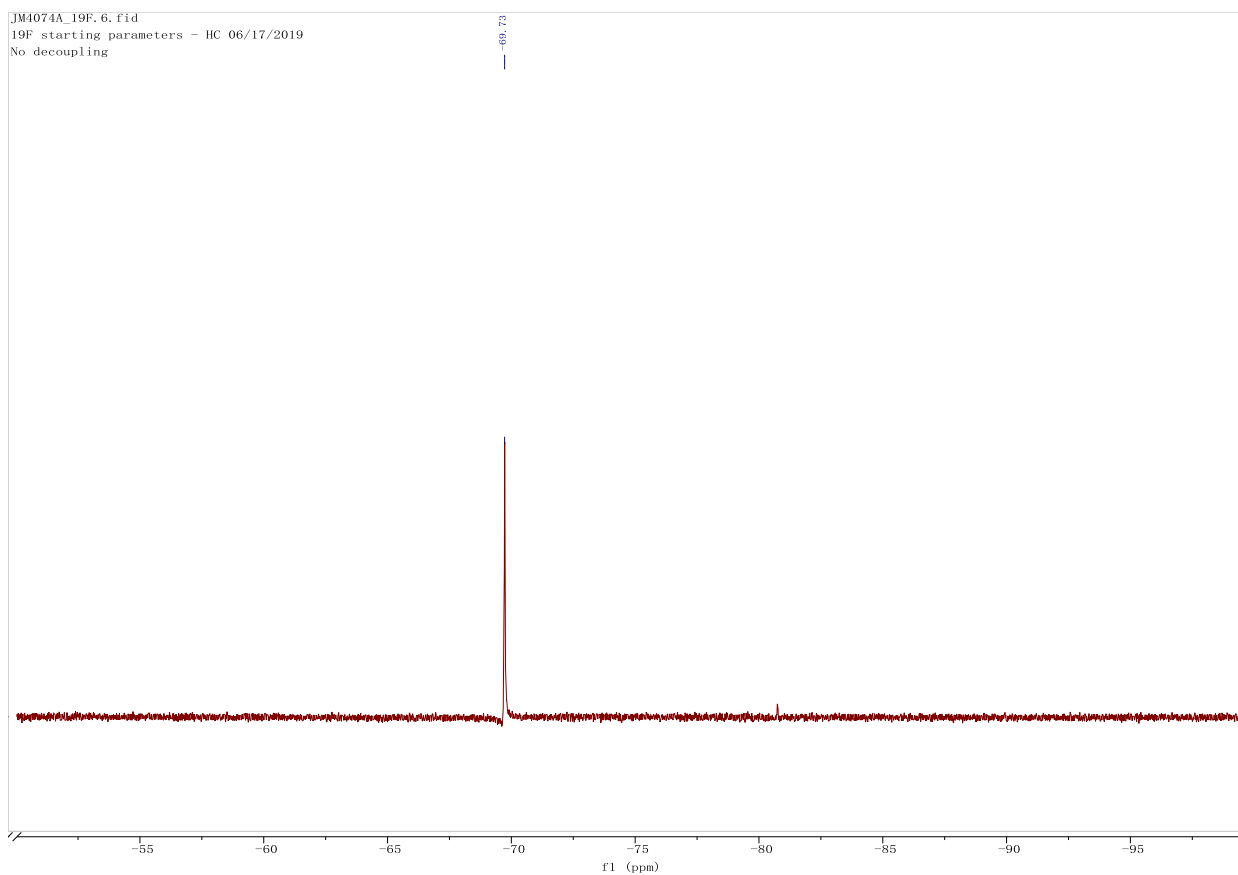

### Compound 3sb

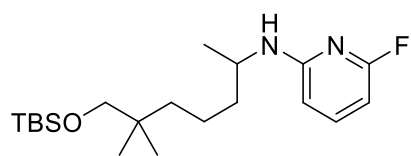

### <sup>1</sup>H NMR

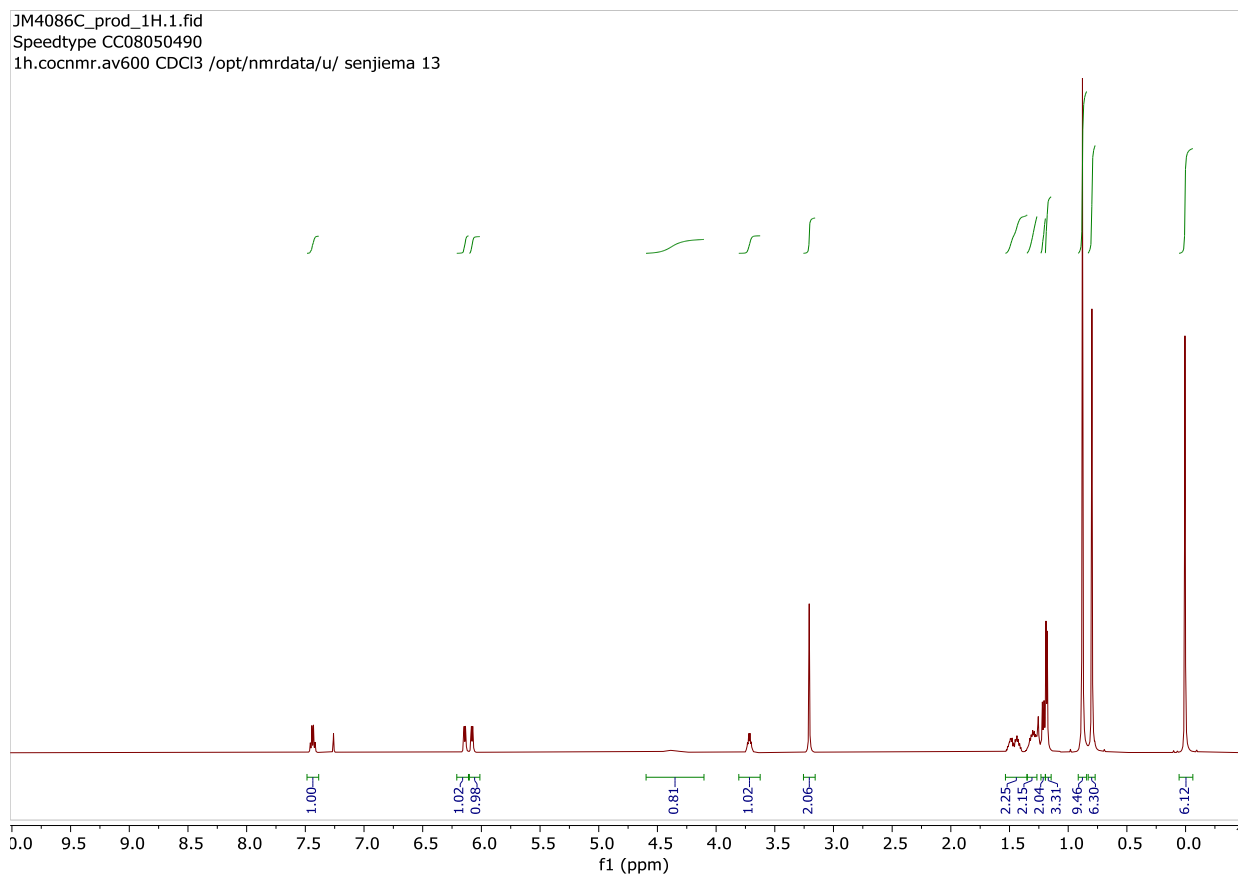

# <sup>13</sup>C NMR

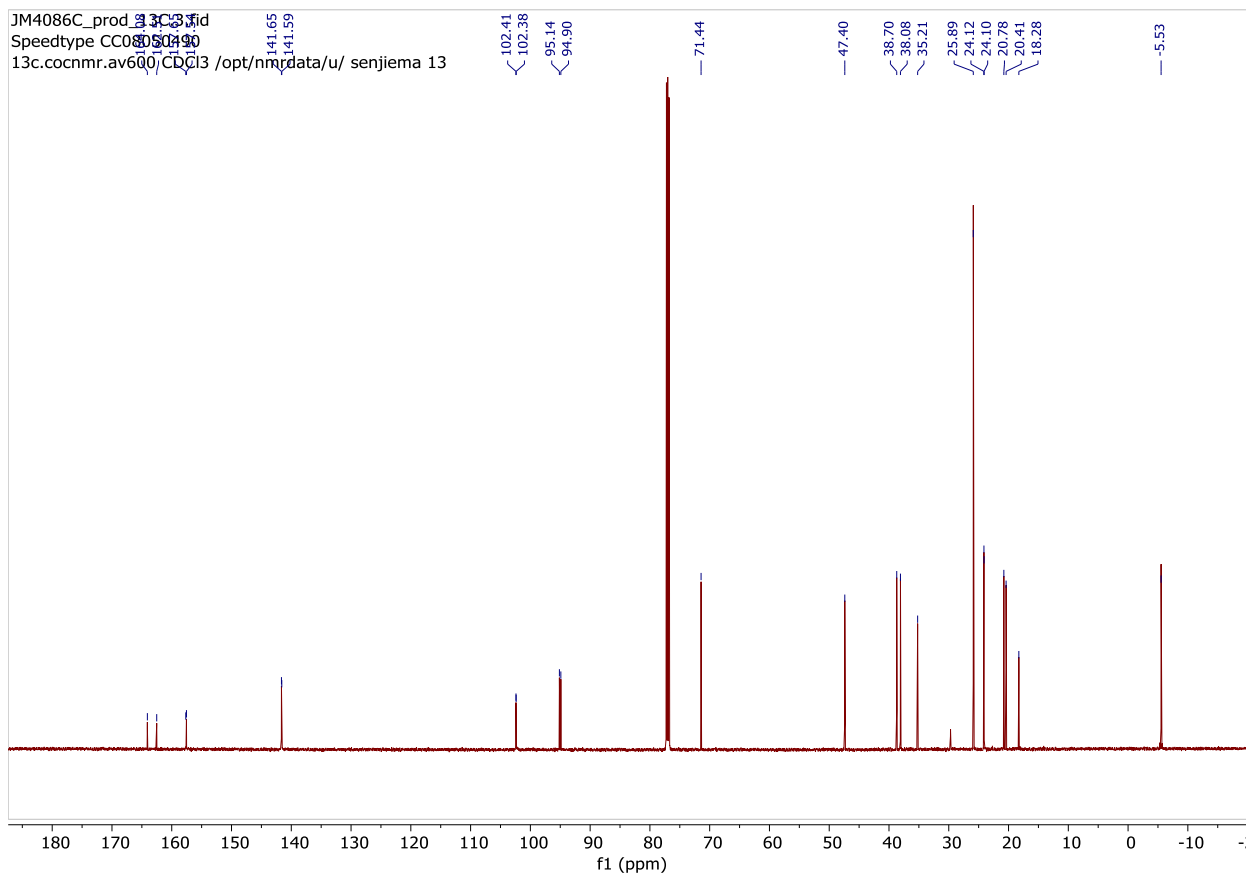

[Return to table of contents]

# <sup>19</sup>F NMR

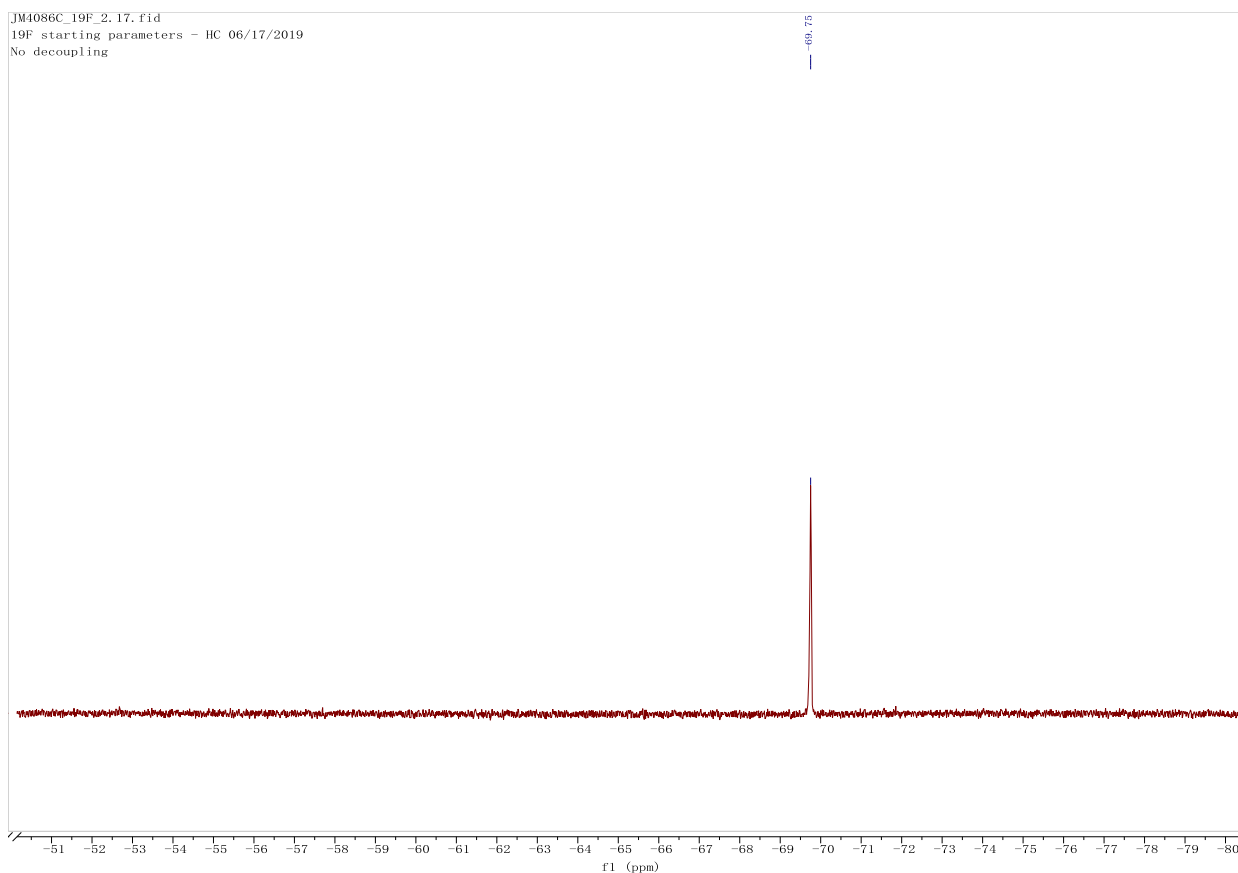

### Compound 3tb

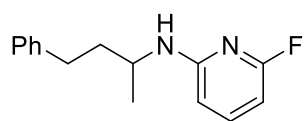

### <sup>1</sup>H NMR

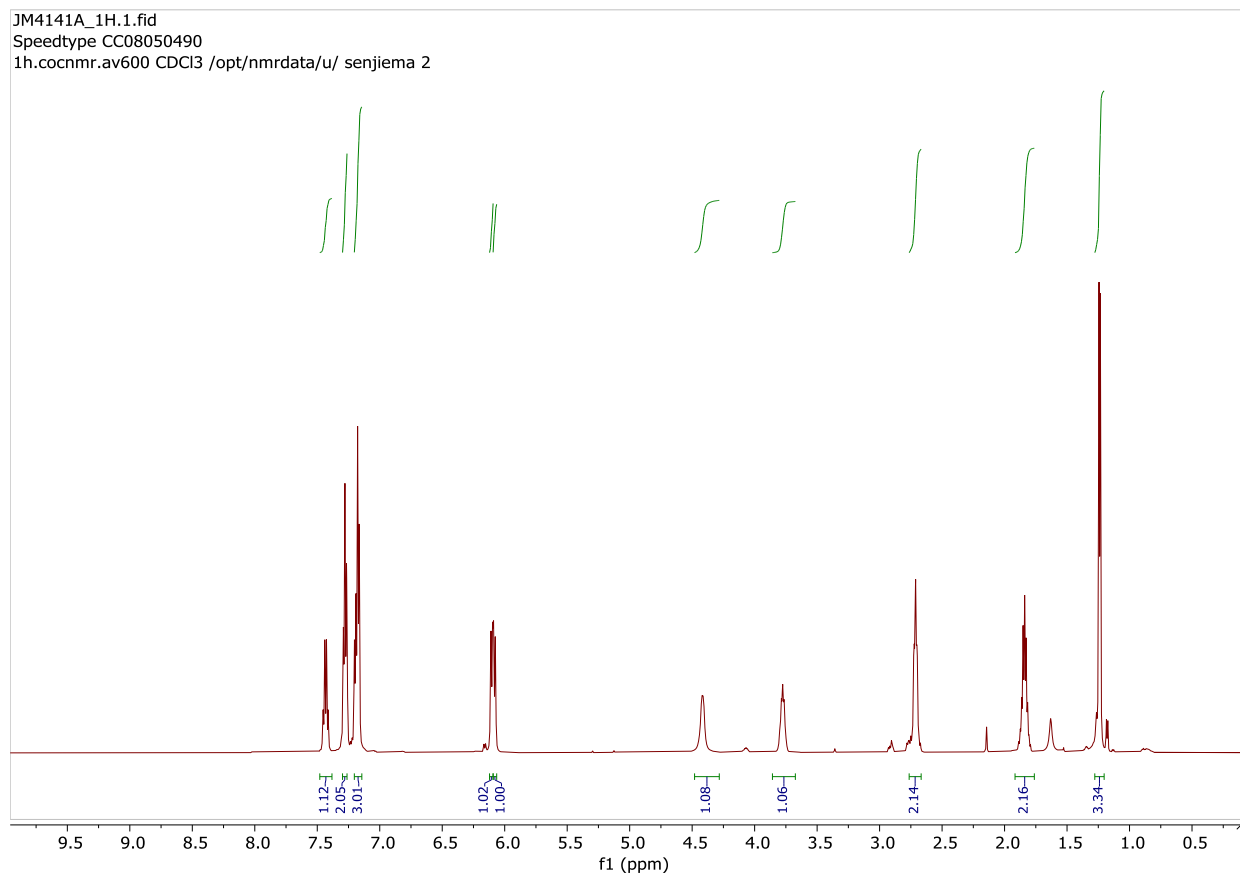

### <sup>13</sup>C NMR

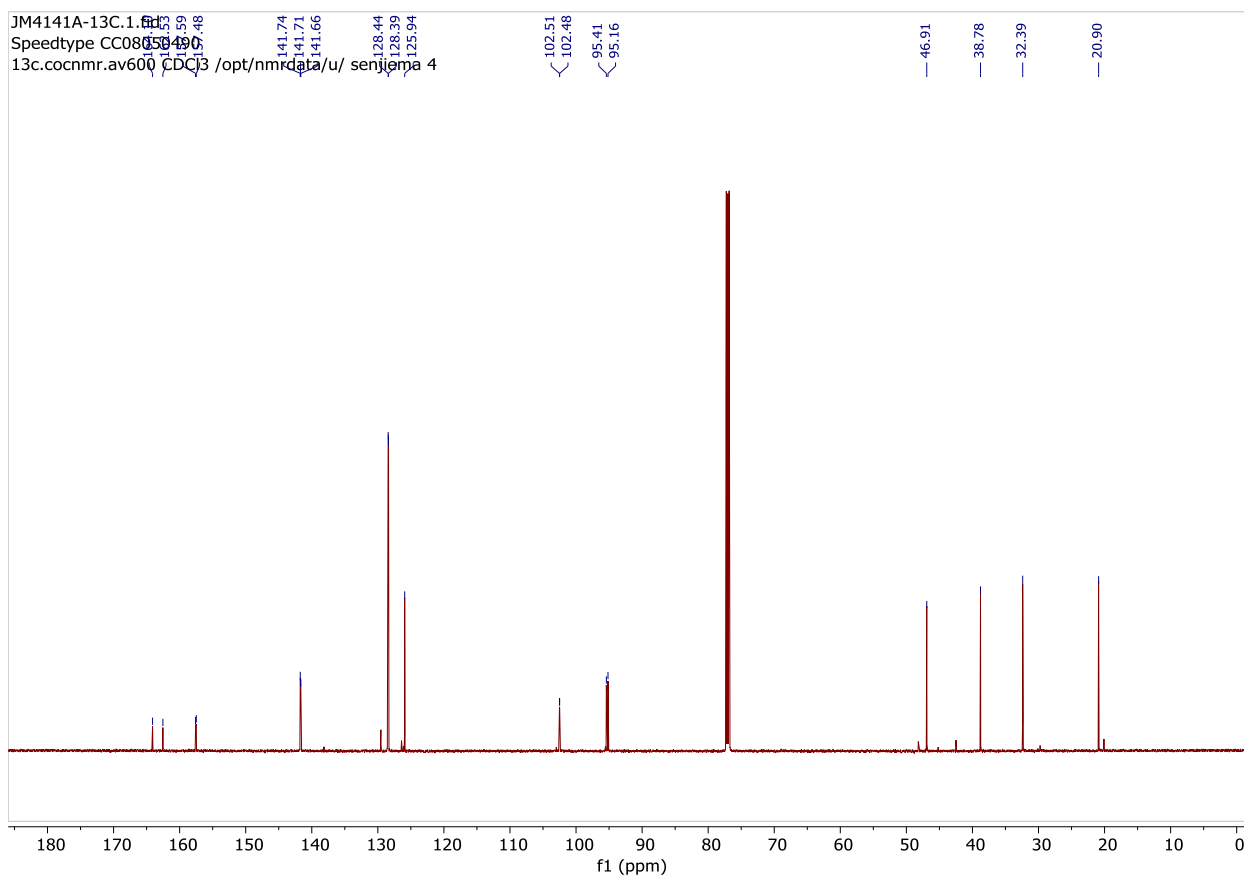

[Return to table of contents]

# <sup>19</sup>F NMR

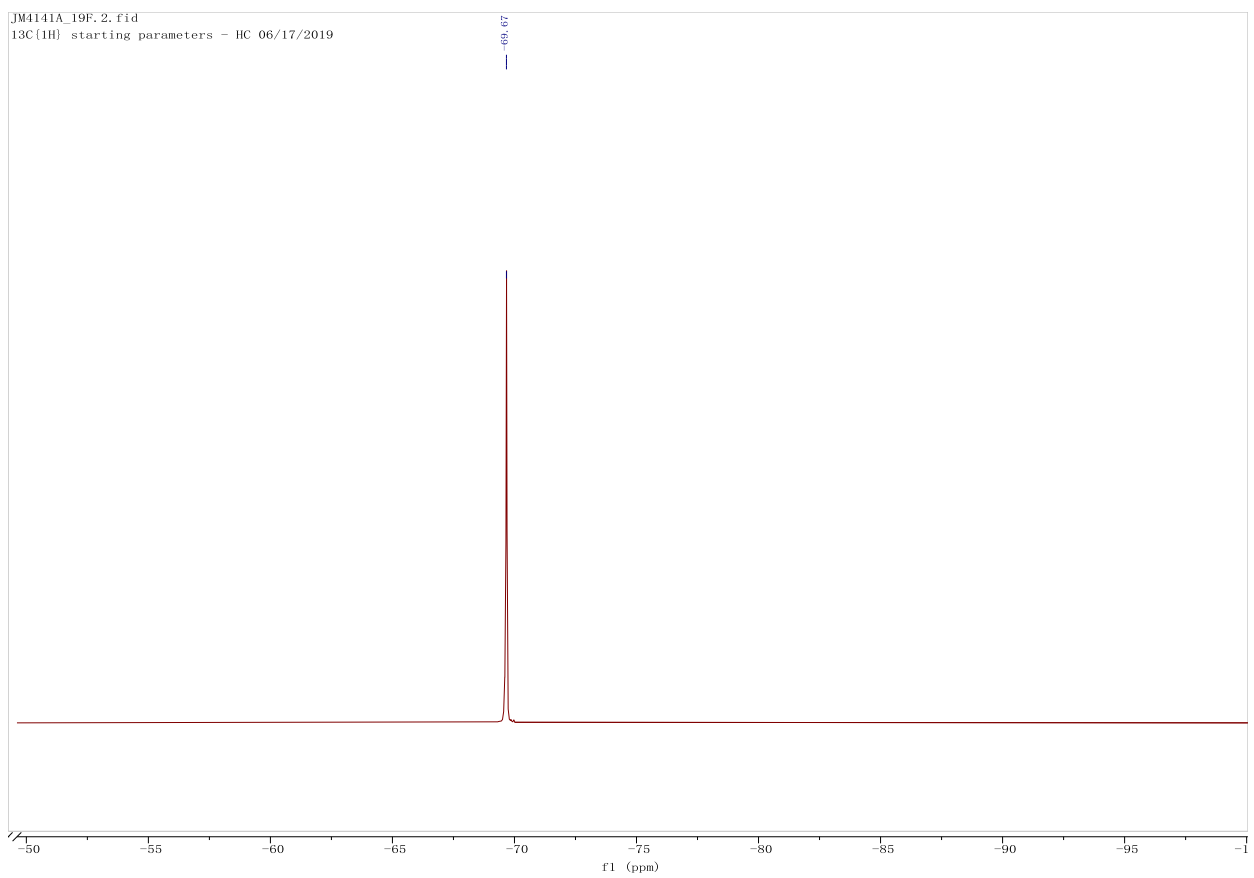

### Compound 3ub

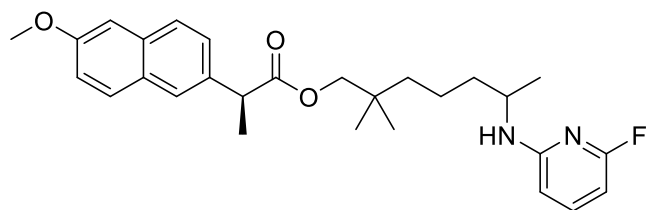

### <sup>1</sup>H NMR

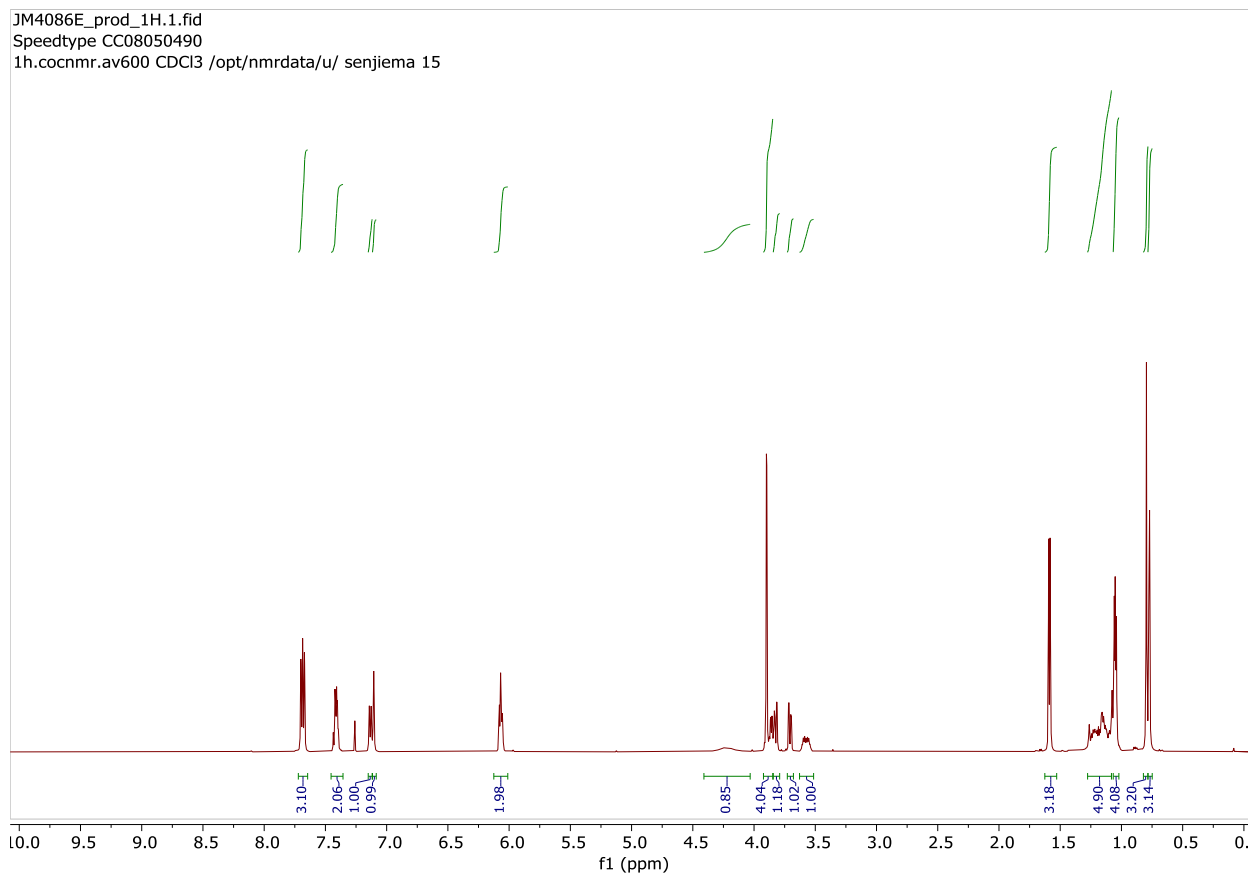



**<sup>13</sup>C NMR**

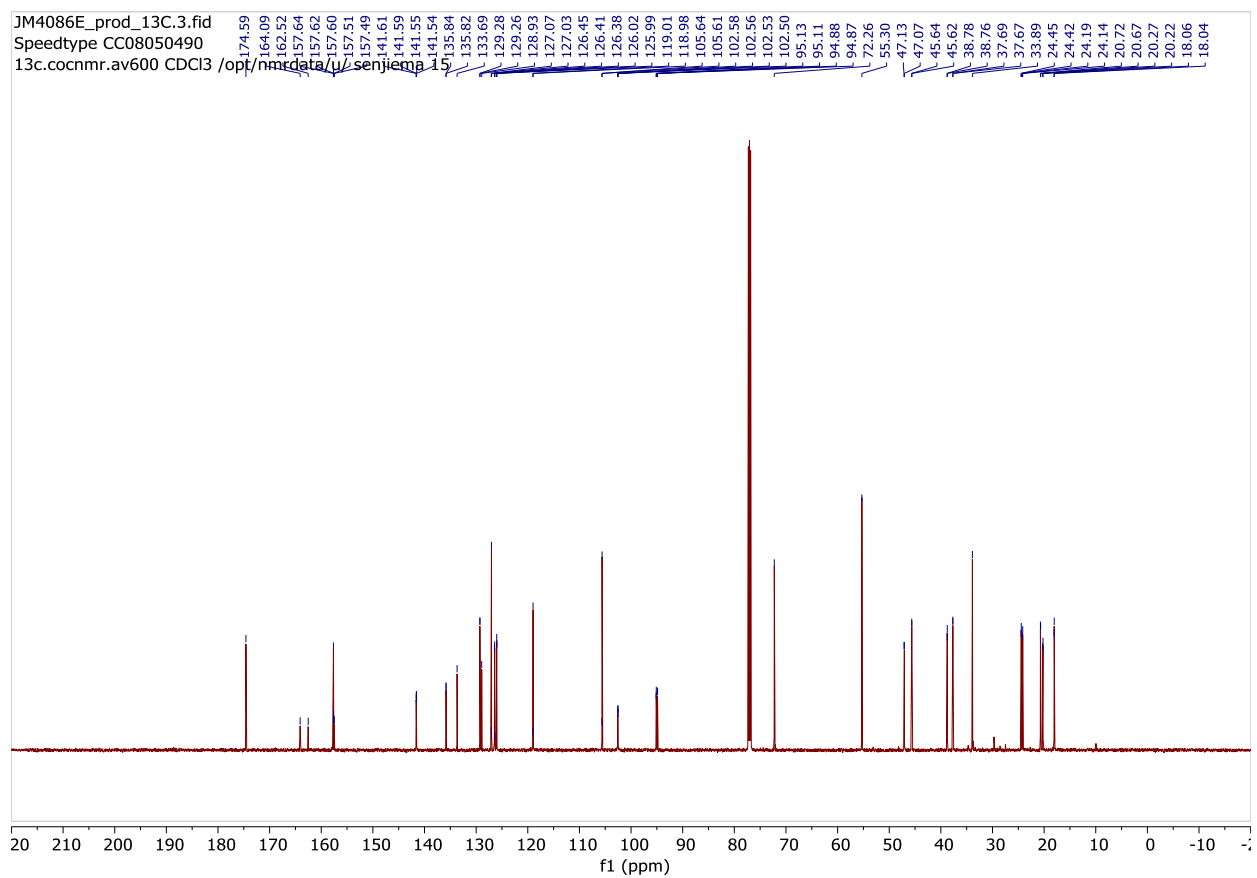

[Return to table of contents]

# <sup>19</sup>F NMR

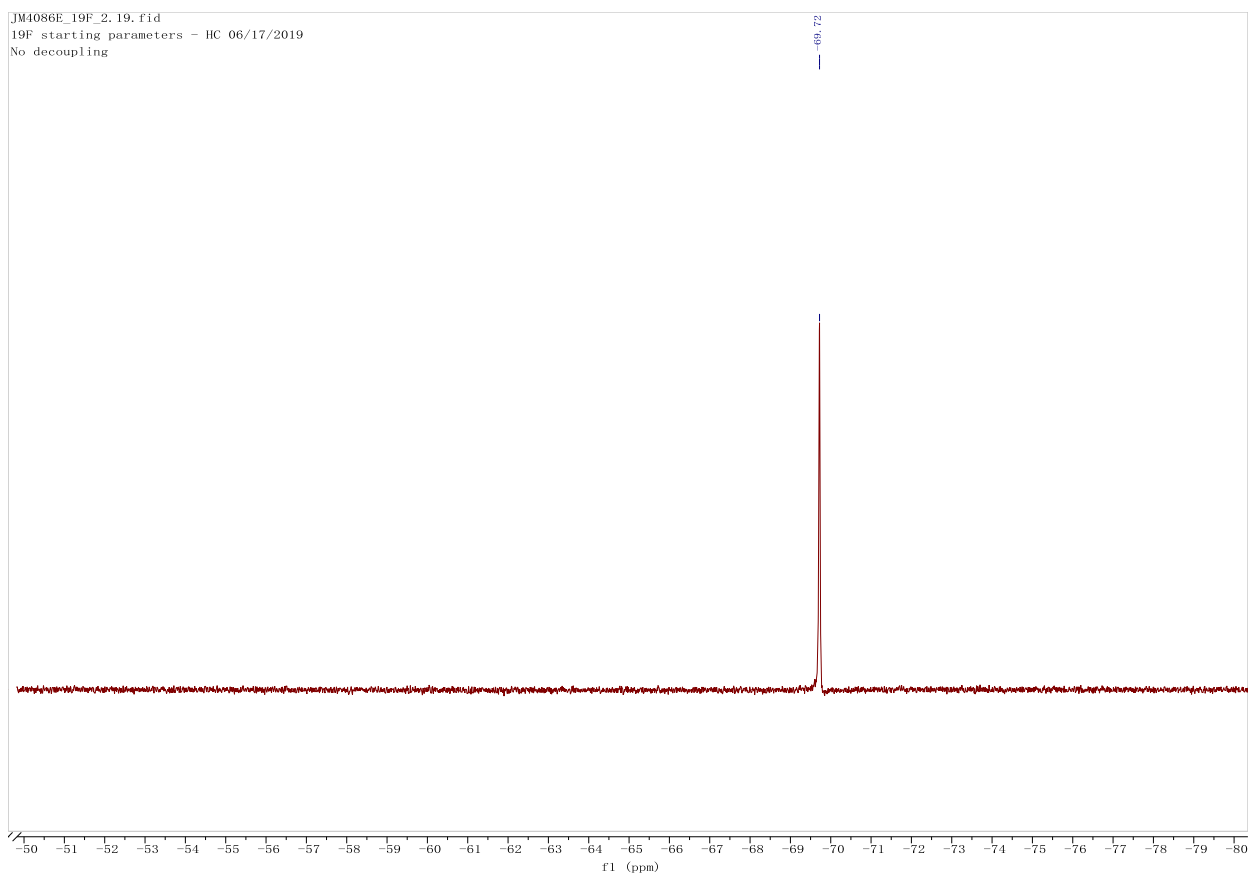

## Compound 3vb

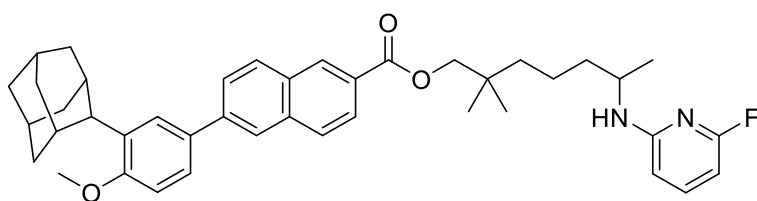

## <sup>1</sup>H NMR

JM4087C\_prod\_1H.1.fid  
Speedtype CC08050490  
1h.cocnmr.av600 CDCl<sub>3</sub> /opt/nmrdata/u/ senjiema 16

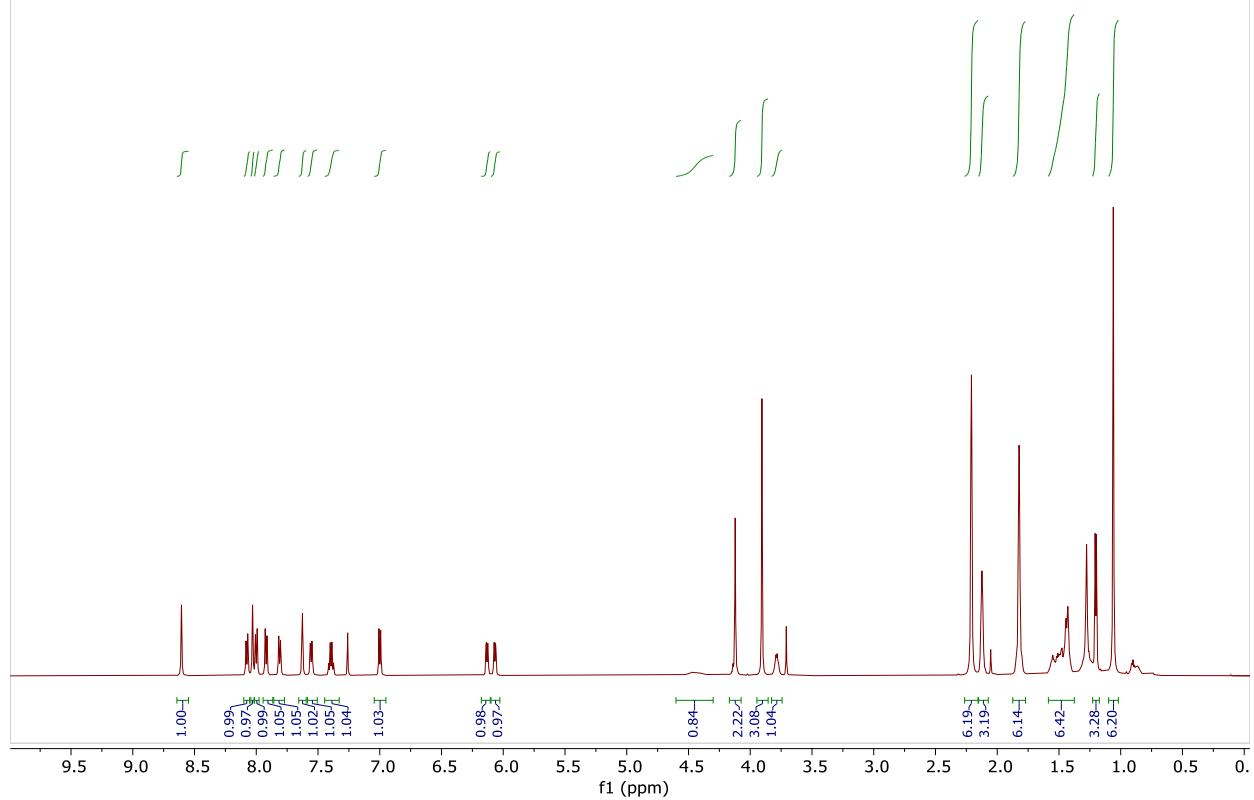

# <sup>13</sup>C NMR

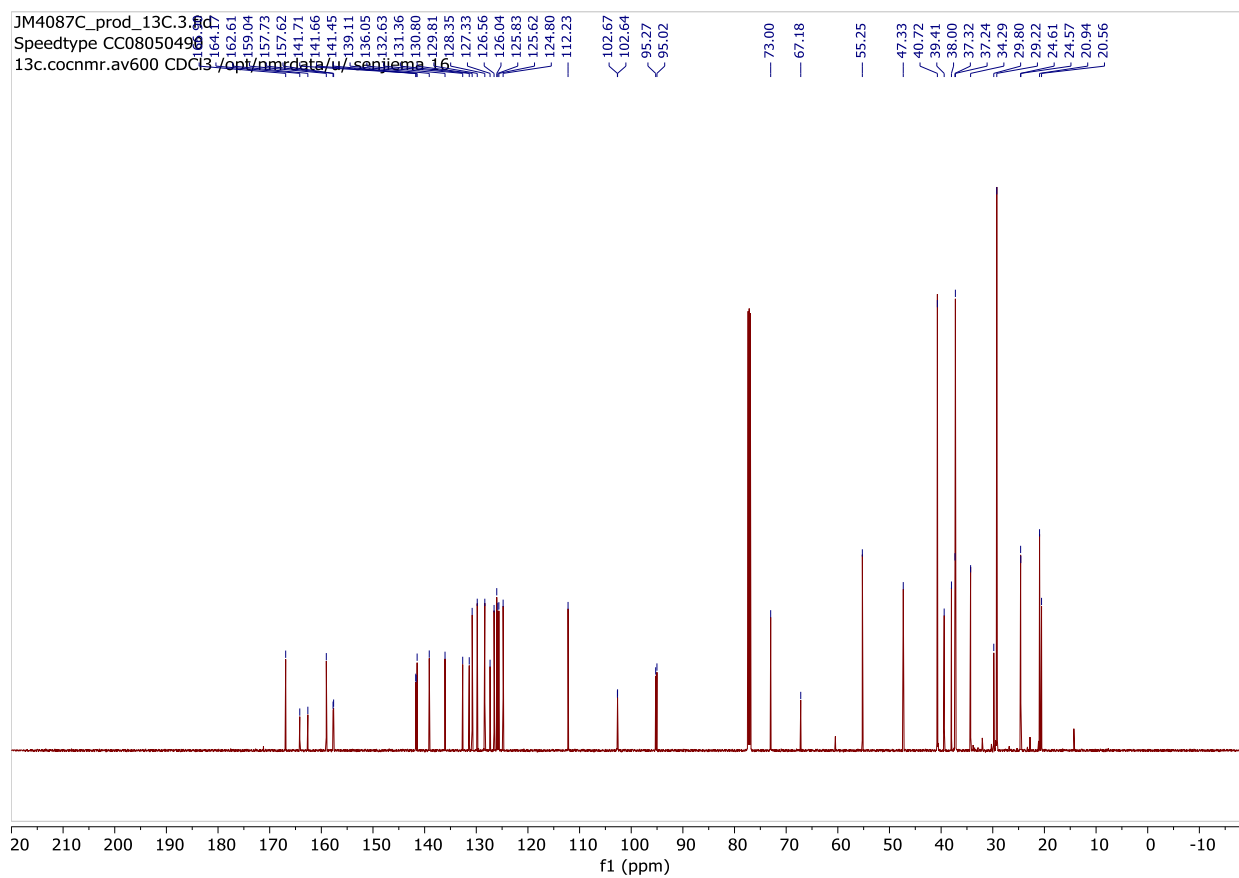

[Return to table of contents]

# <sup>19</sup>F NMR

JM4087C\_19F.4.fid  
1H starting parameters - HC 06/17/2019  
No decoupling

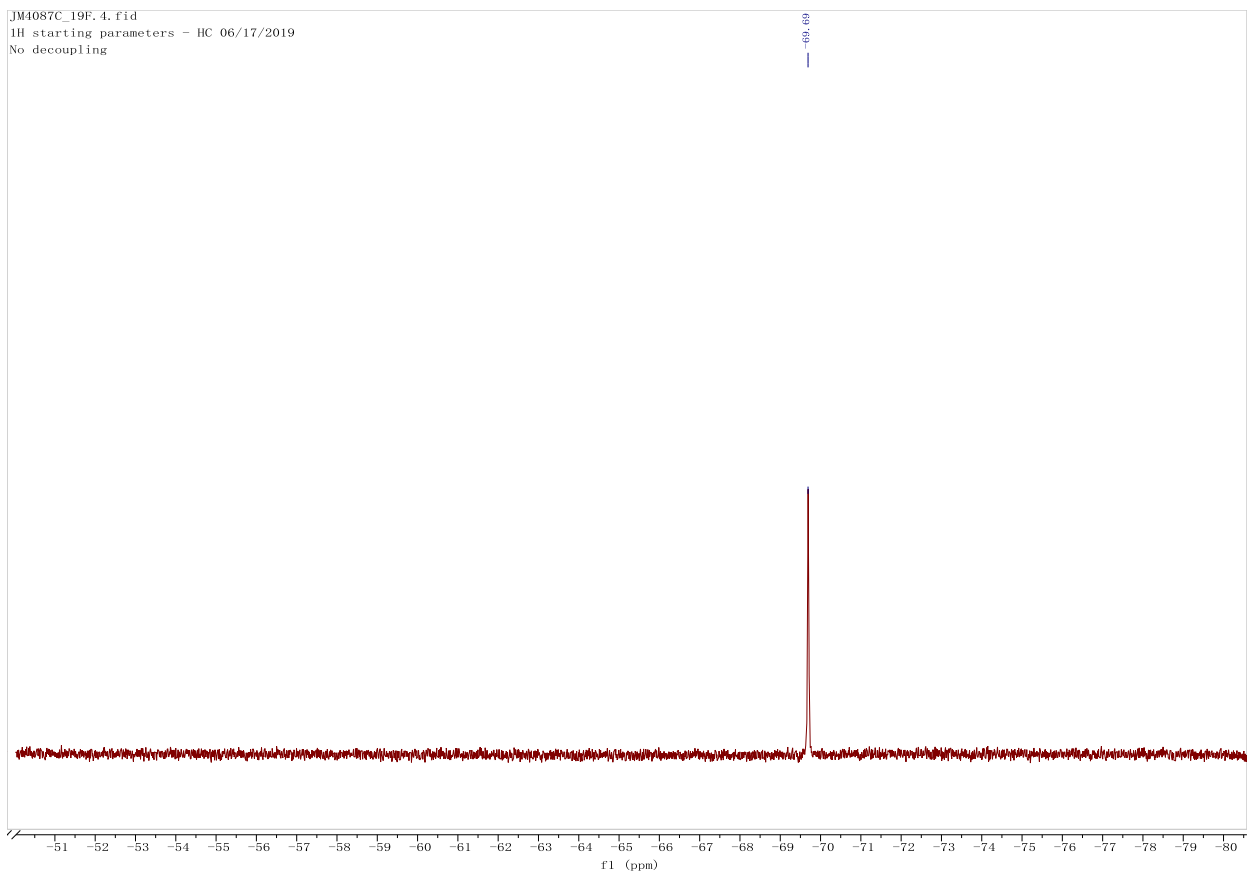



**<sup>13</sup>C NMR**

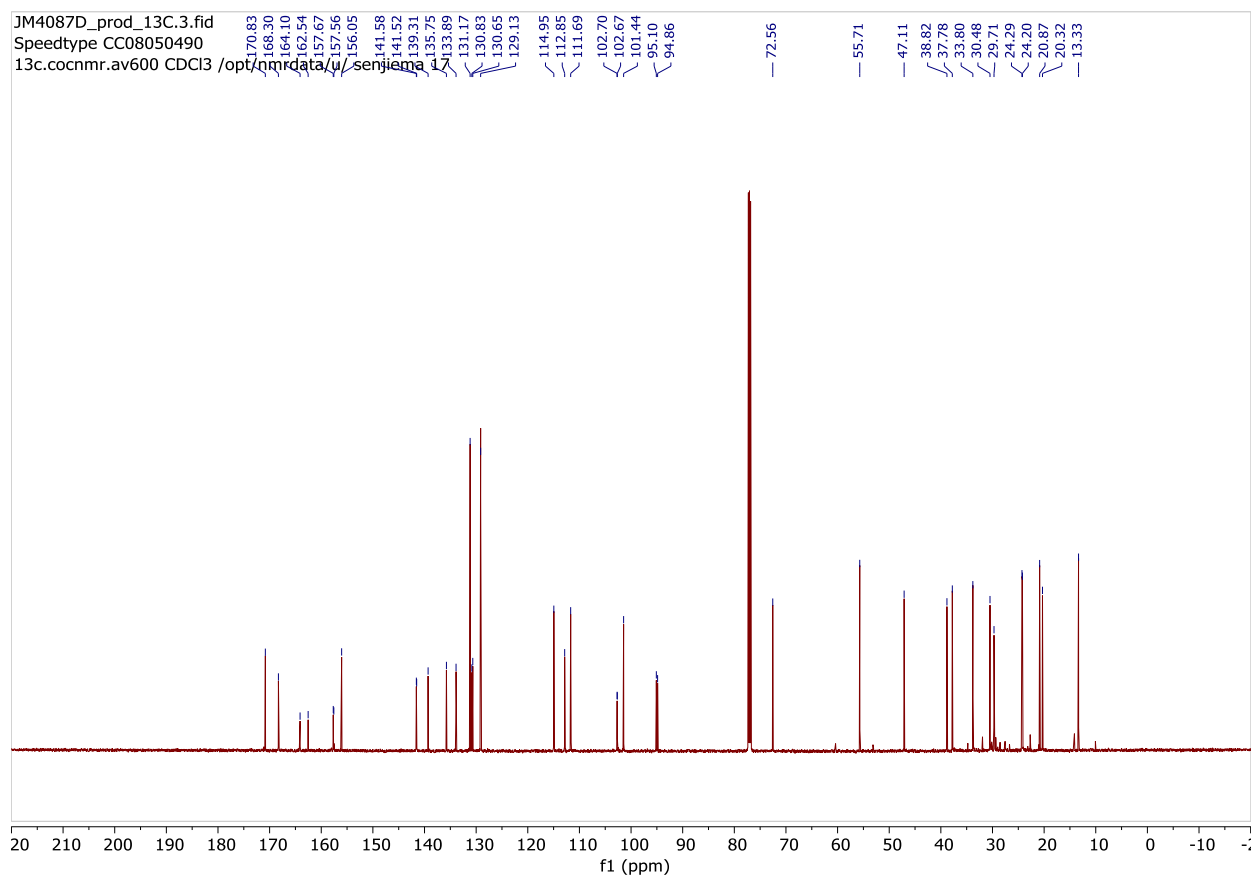

[Return to table of contents]

# <sup>19</sup>F NMR

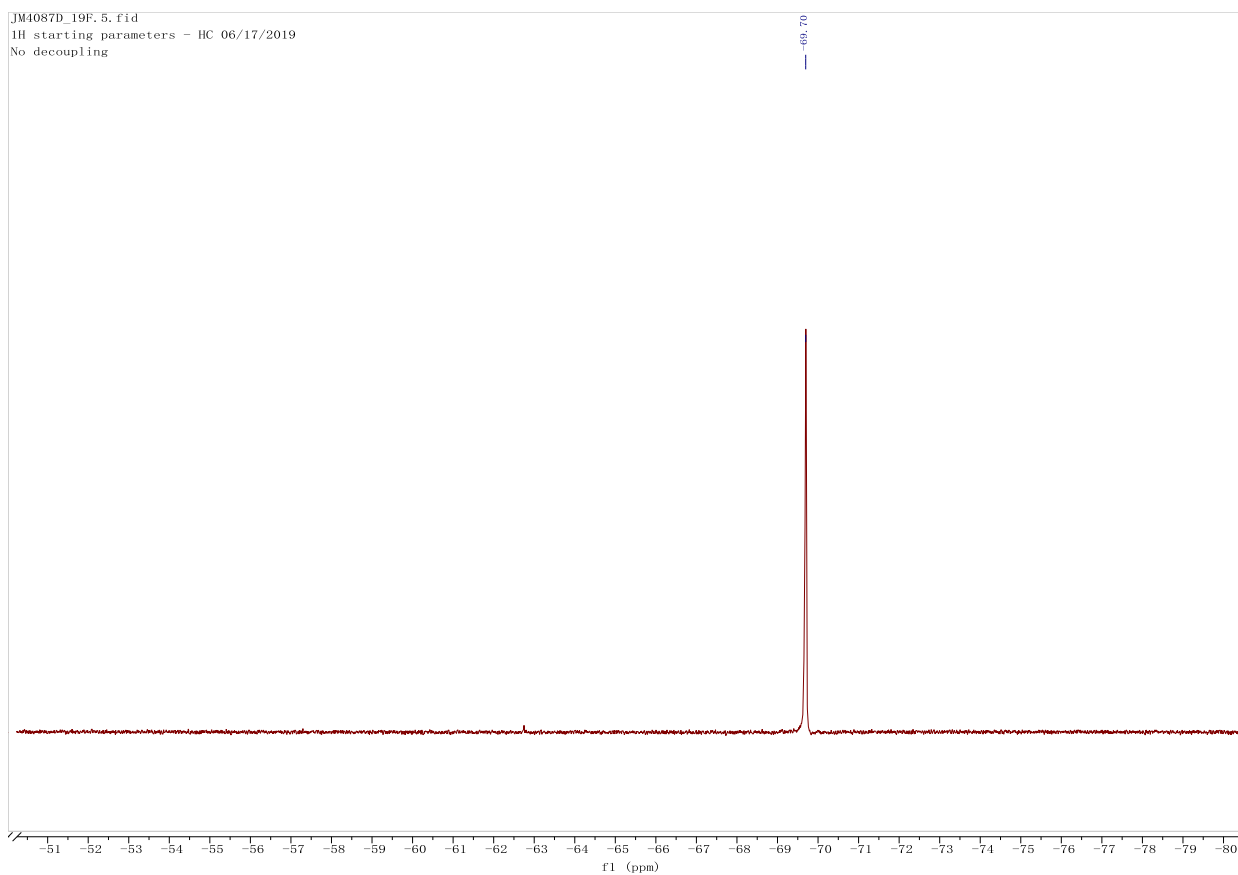



### Compound 3xb

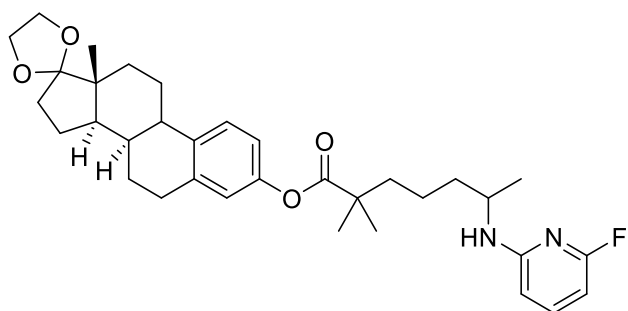

### <sup>1</sup>H NMR

JM4074E\_prod\_1H.1.fid  
Speedtype CC08050490  
1h.cocnmr.av600 CDCI3 /opt/nmrdata/u/ senjiema 5

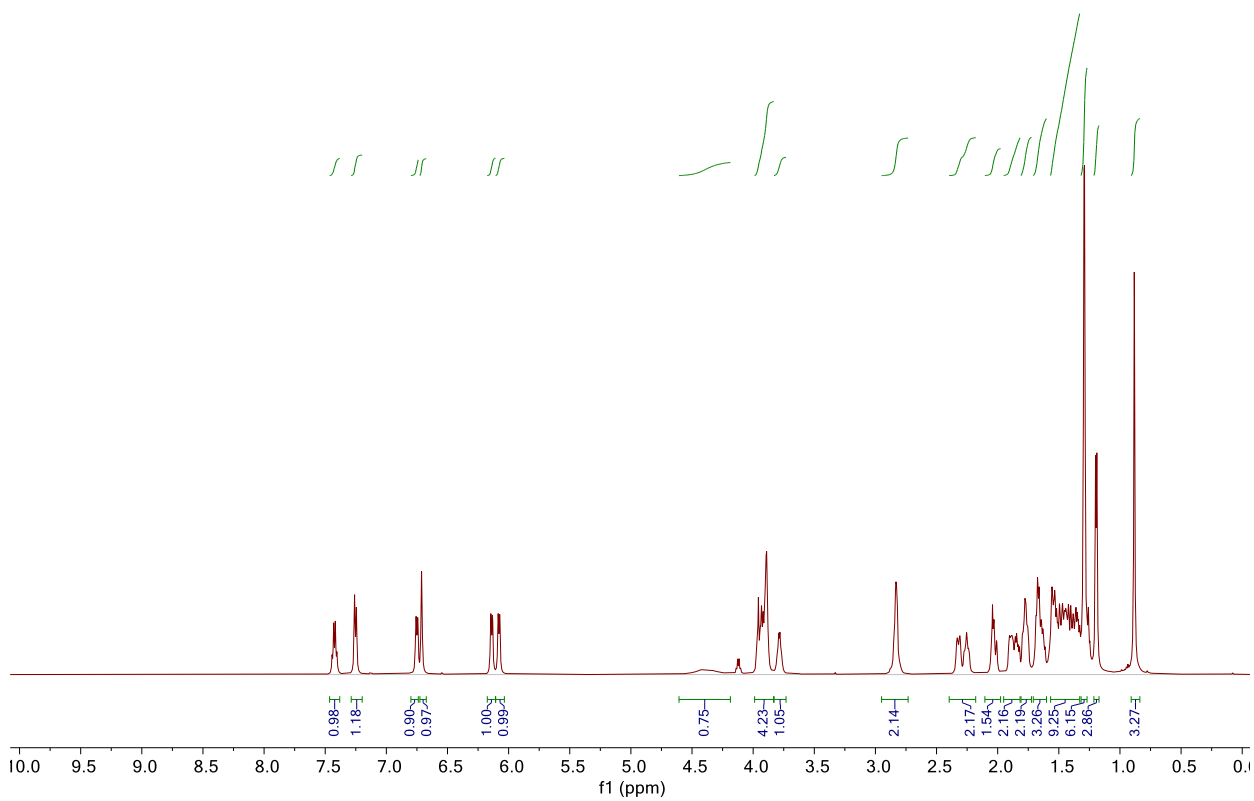

# <sup>13</sup>C NMR

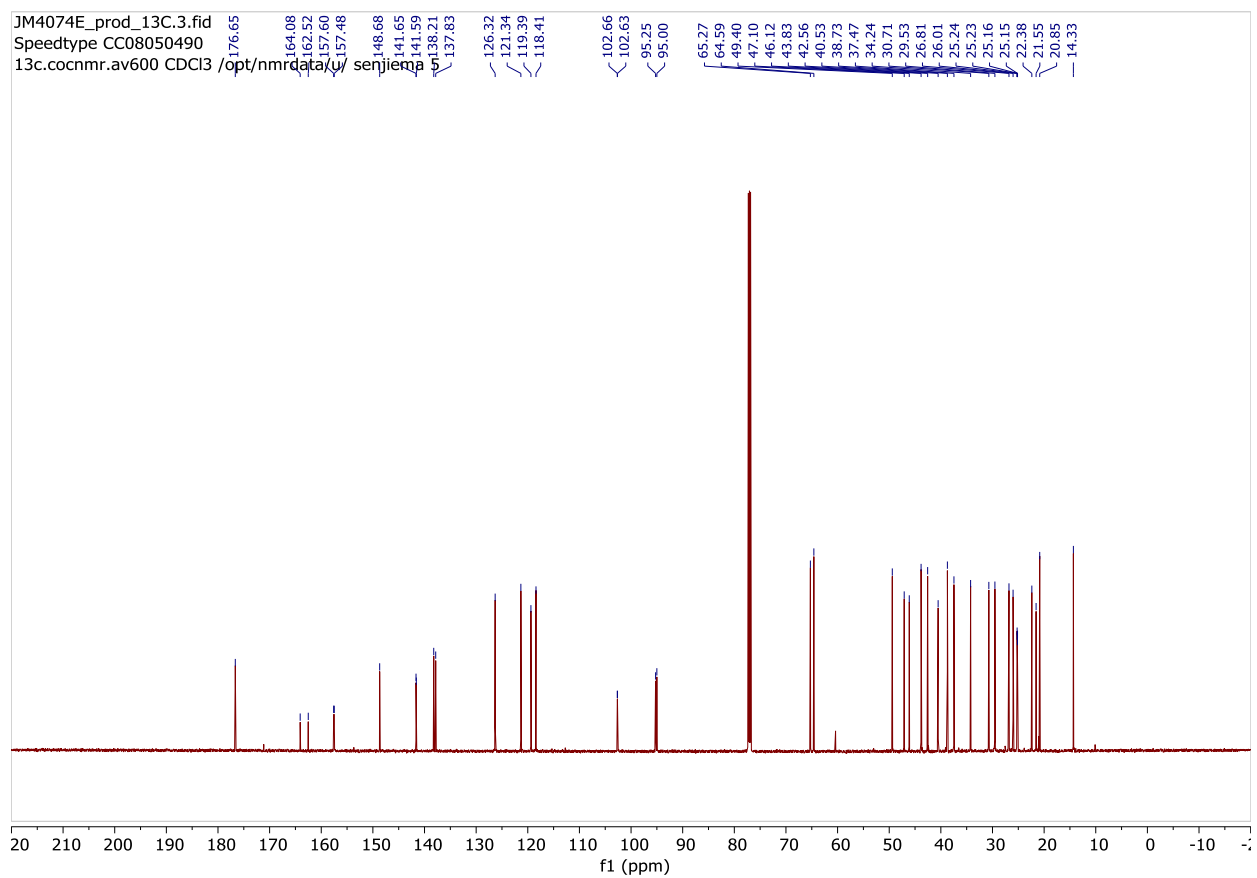

[Return to table of contents]

# <sup>19</sup>F NMR

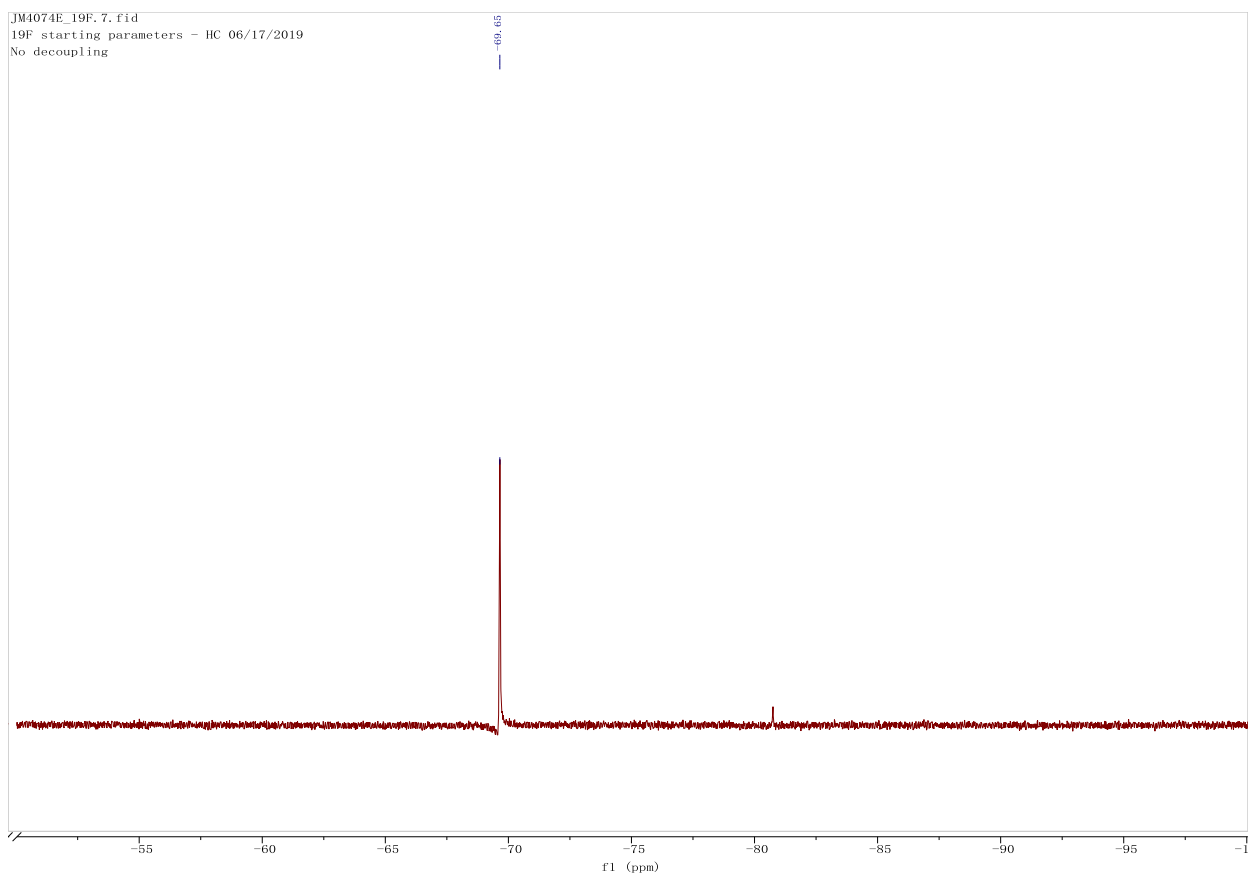

### Compound 3ac

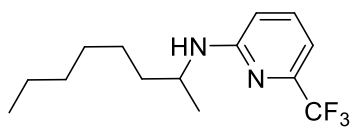

### <sup>1</sup>H NMR

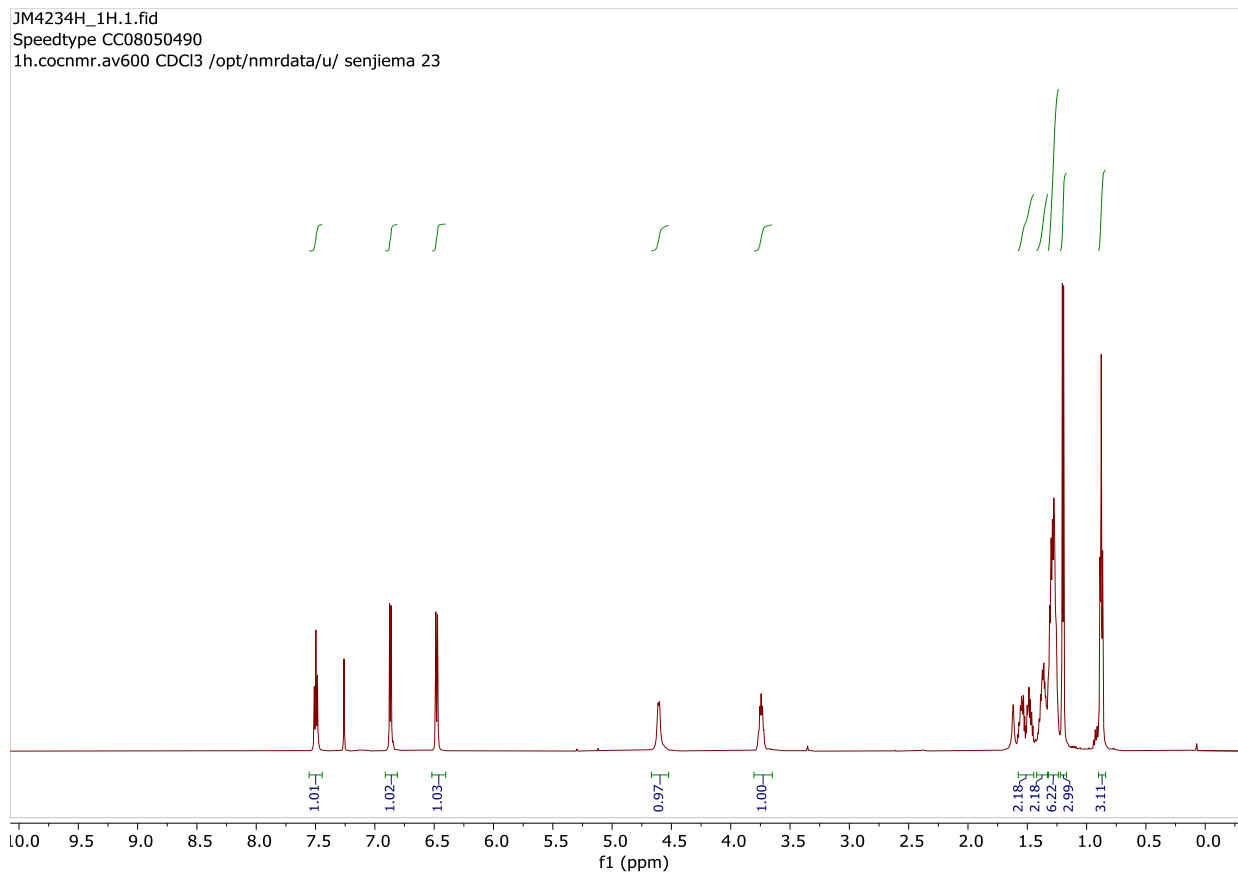

**<sup>13</sup>C NMR**

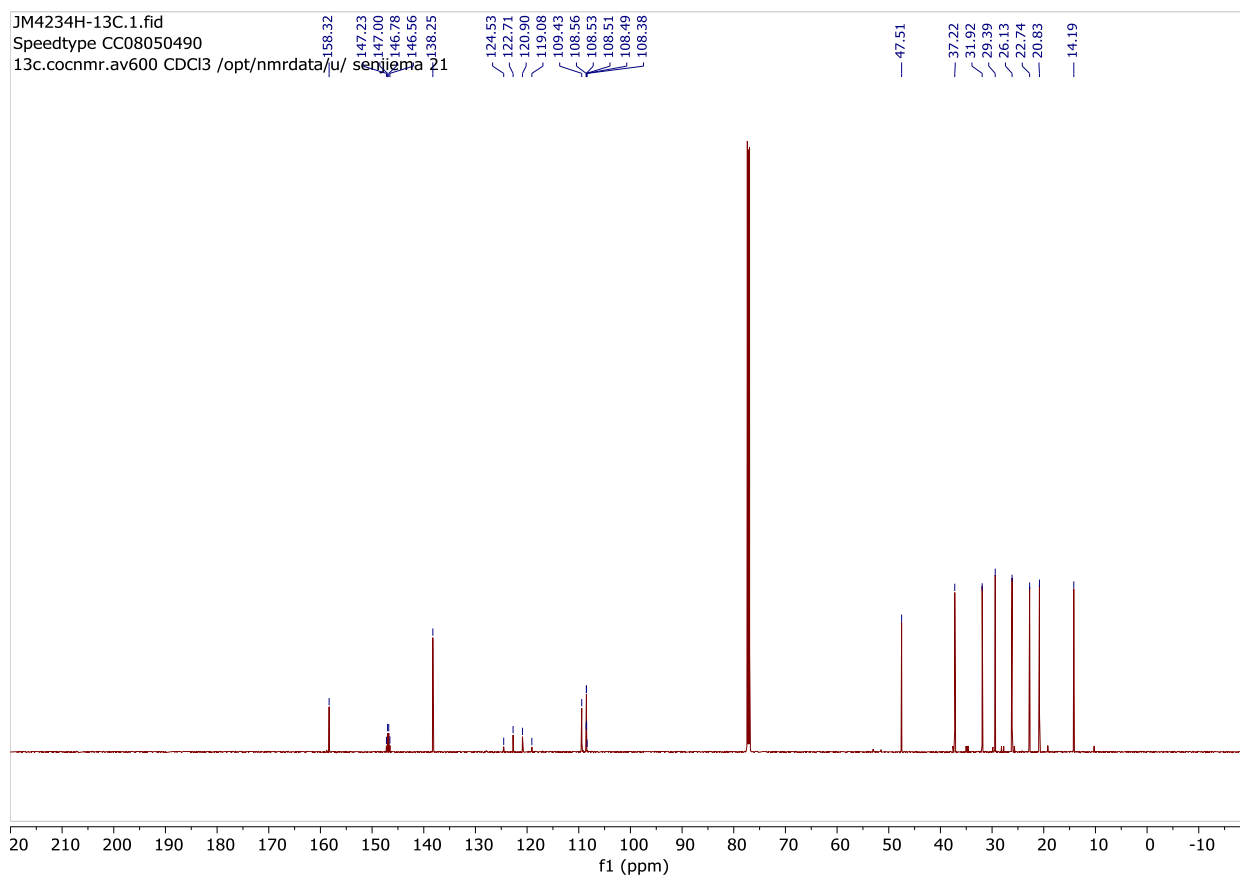

[Return to table of contents]

# <sup>19</sup>F NMR

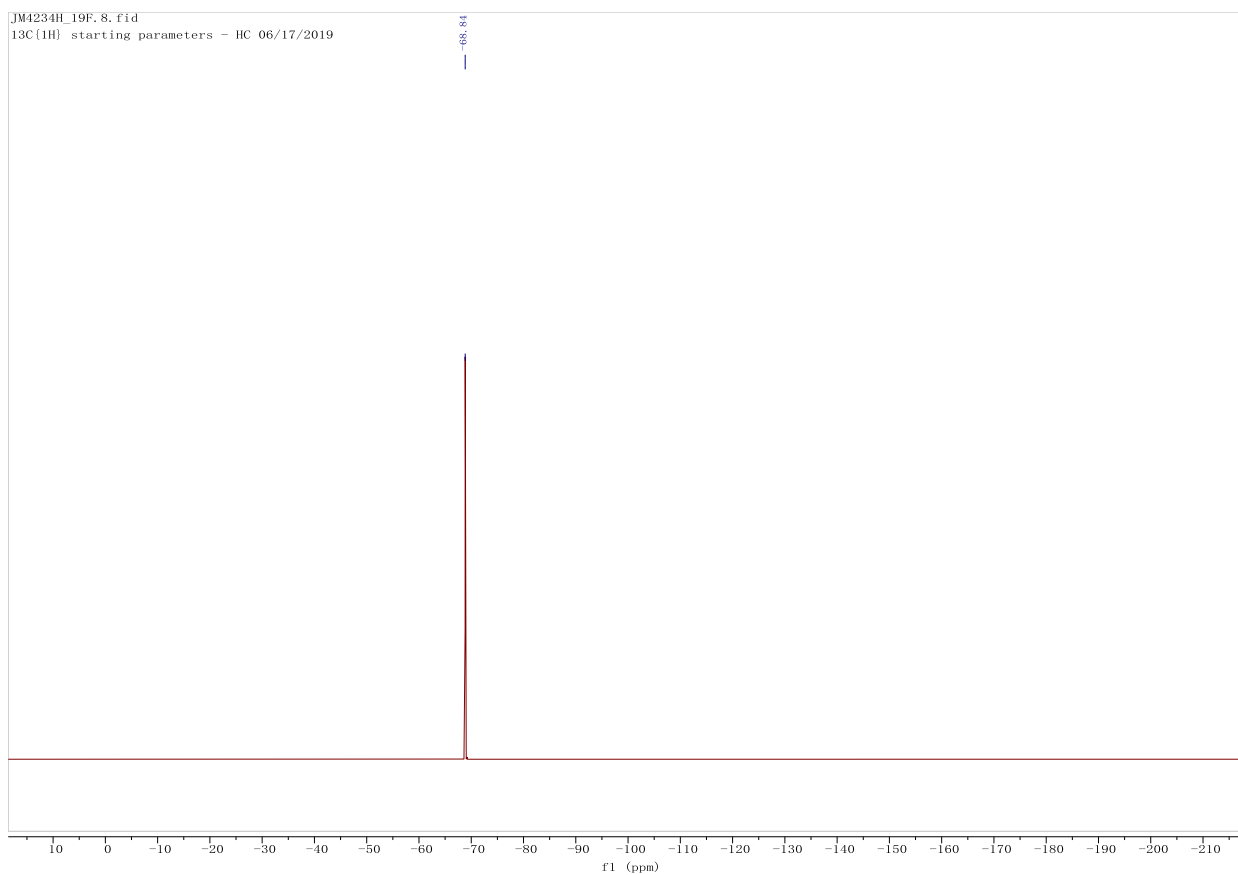

### Compound 3ad

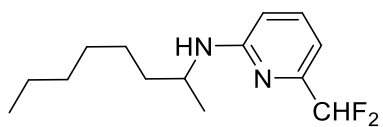

### <sup>1</sup>H NMR

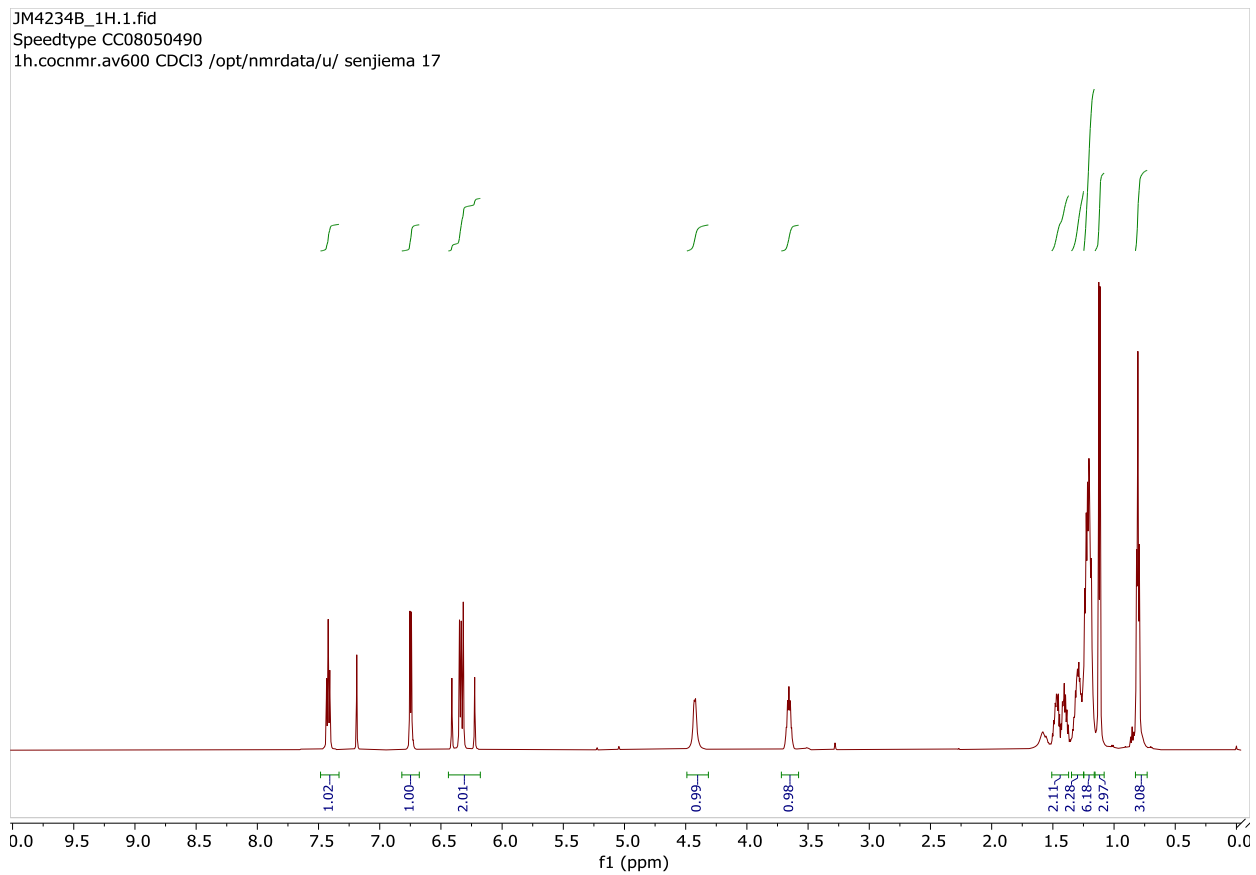

### <sup>13</sup>C NMR

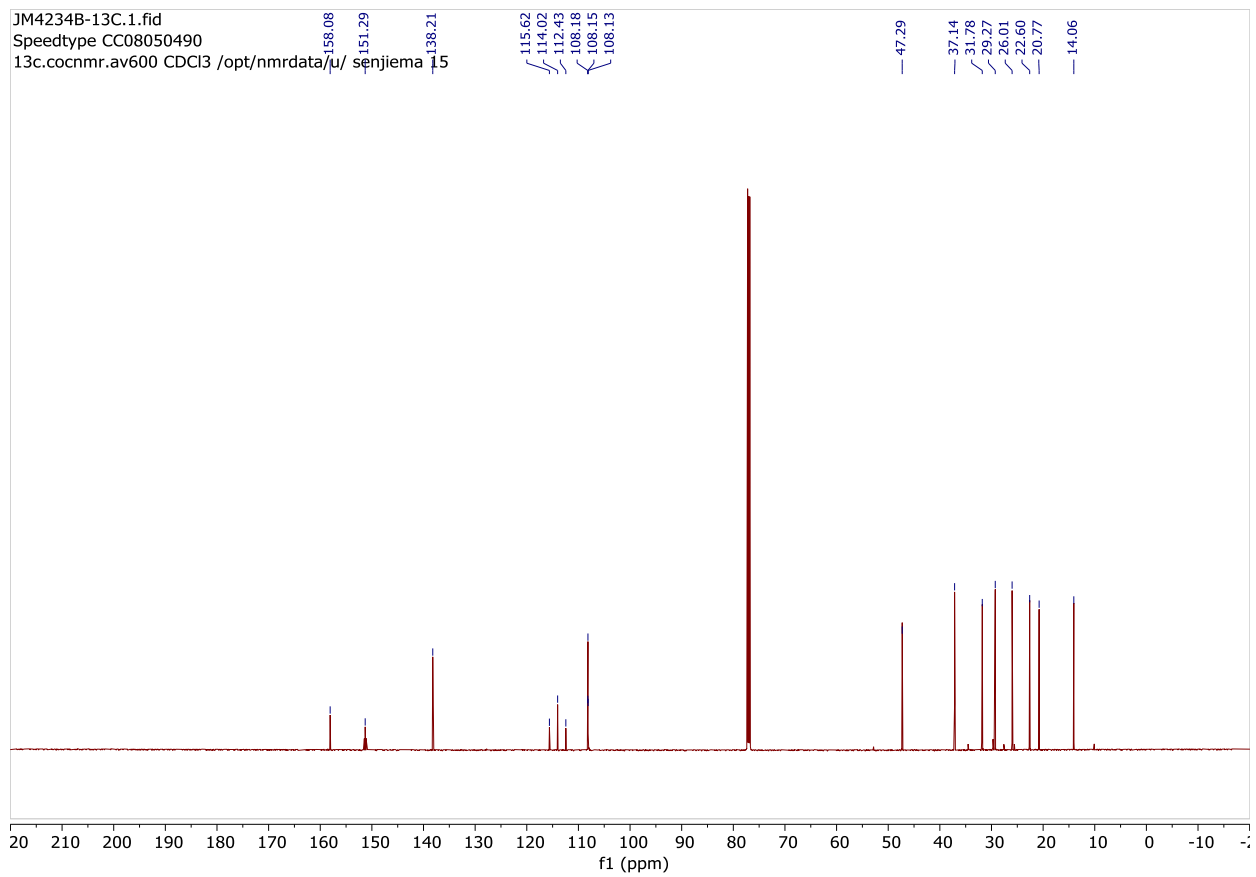



**$^{19}\text{F}$  NMR**

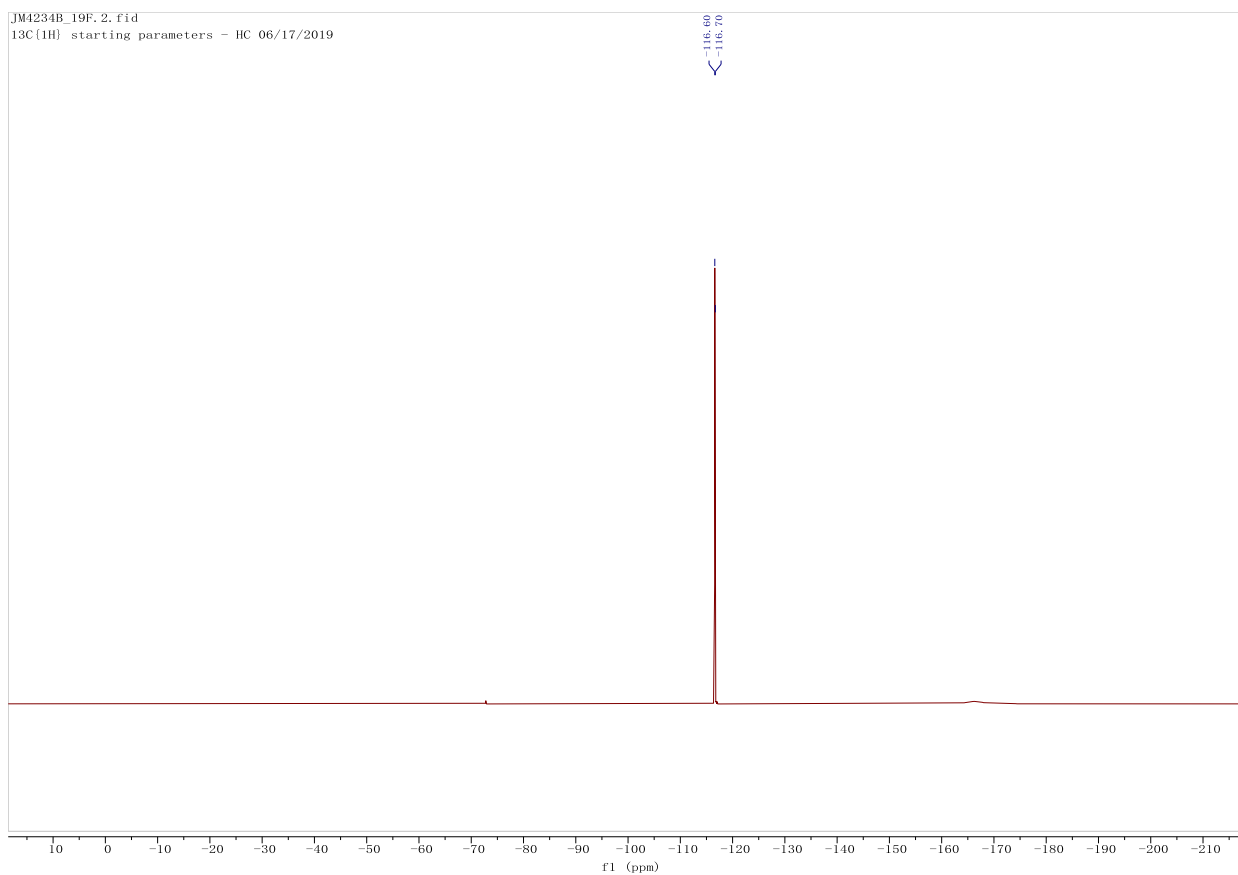

### Compound 3ae

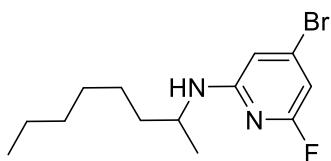

### <sup>1</sup>H NMR

JM4234E\_1H.1.fid  
Speedtype CC08050490  
1h.cocnmr.av600 CDCl3 /opt/nmrdata/u/ senjiema 20

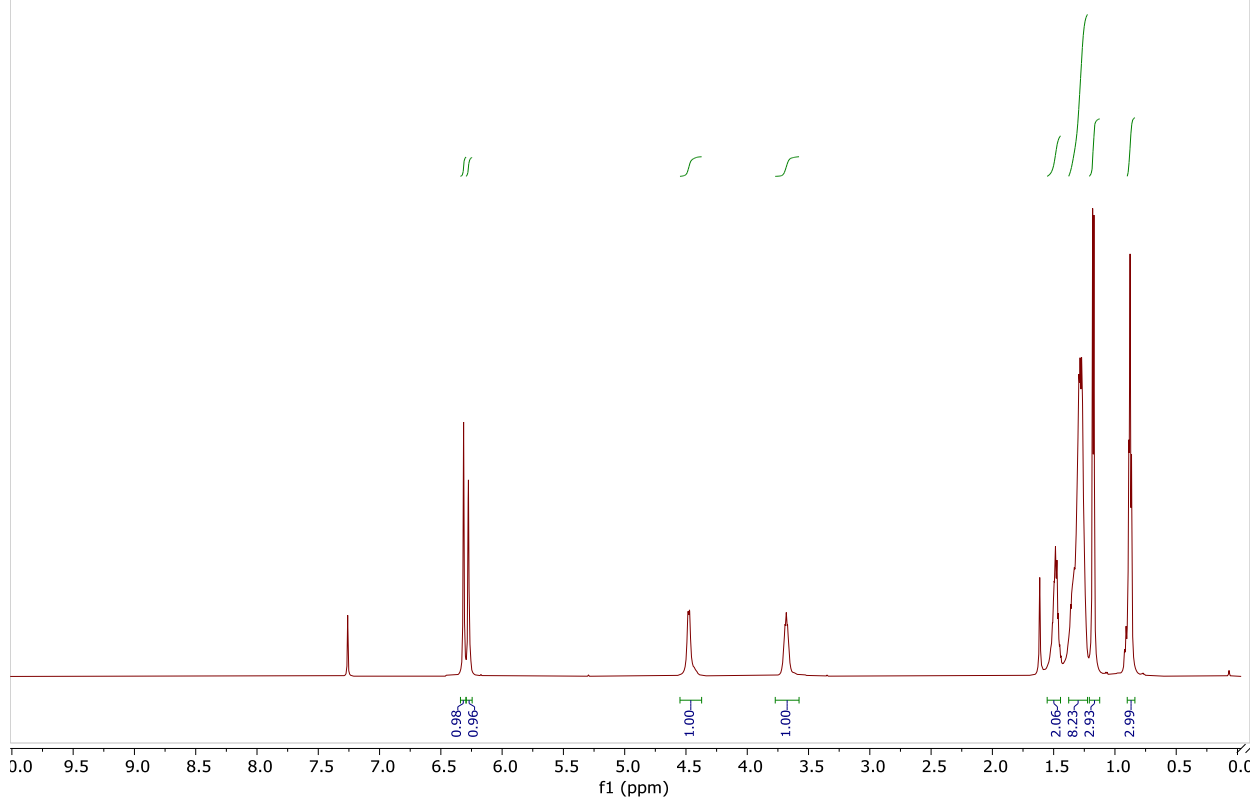

### <sup>13</sup>C NMR

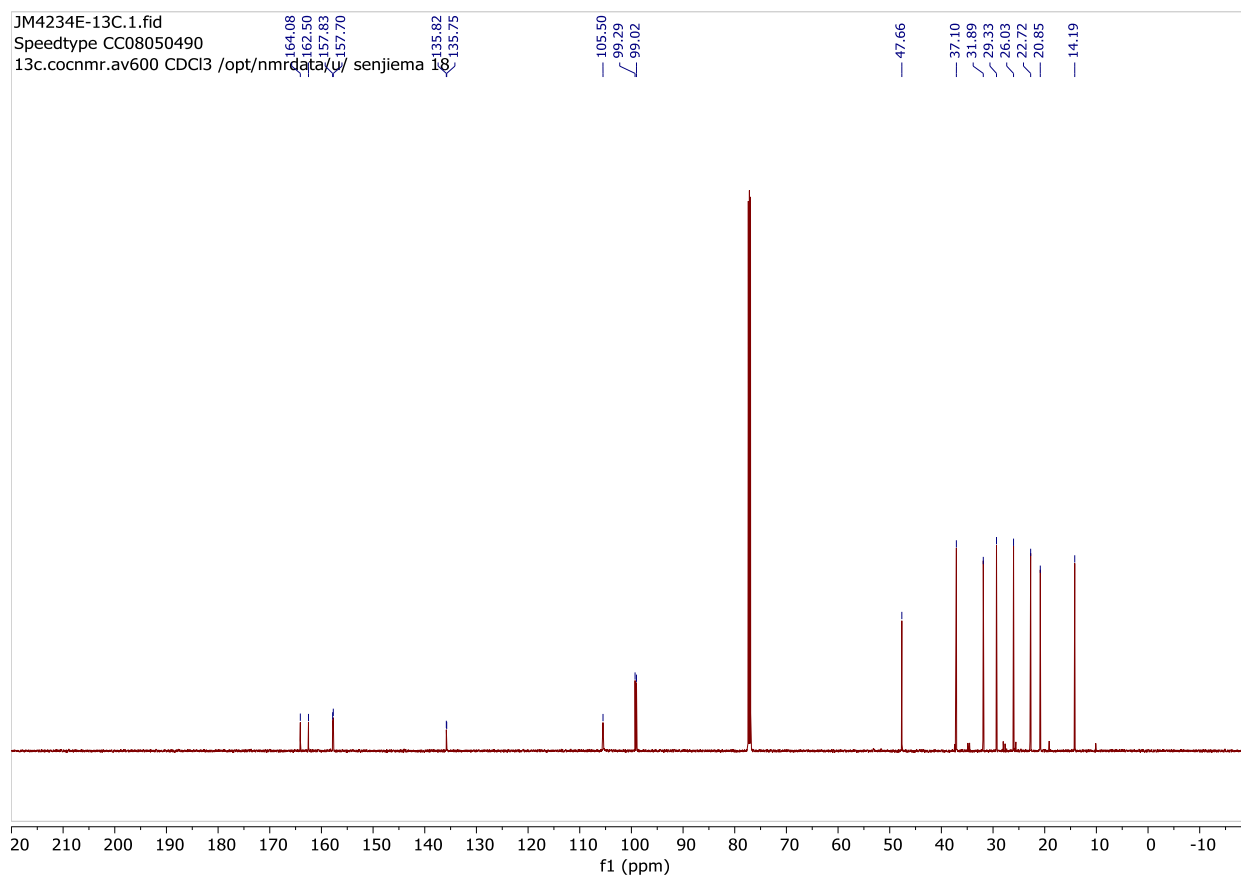

[Return to table of contents]

# <sup>19</sup>F NMR

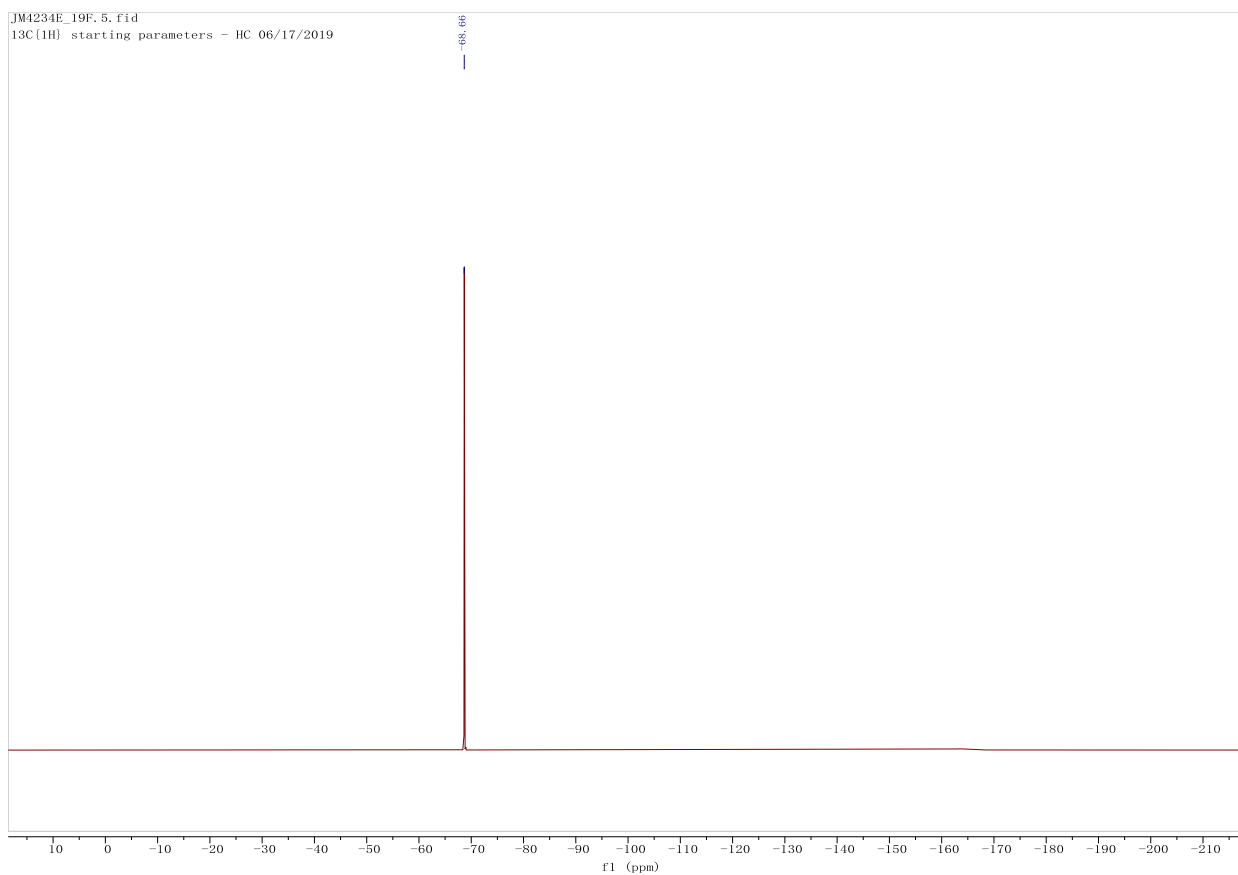

### Compound 3af

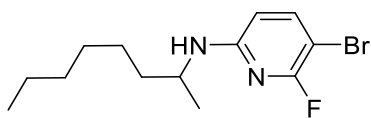

### <sup>1</sup>H NMR

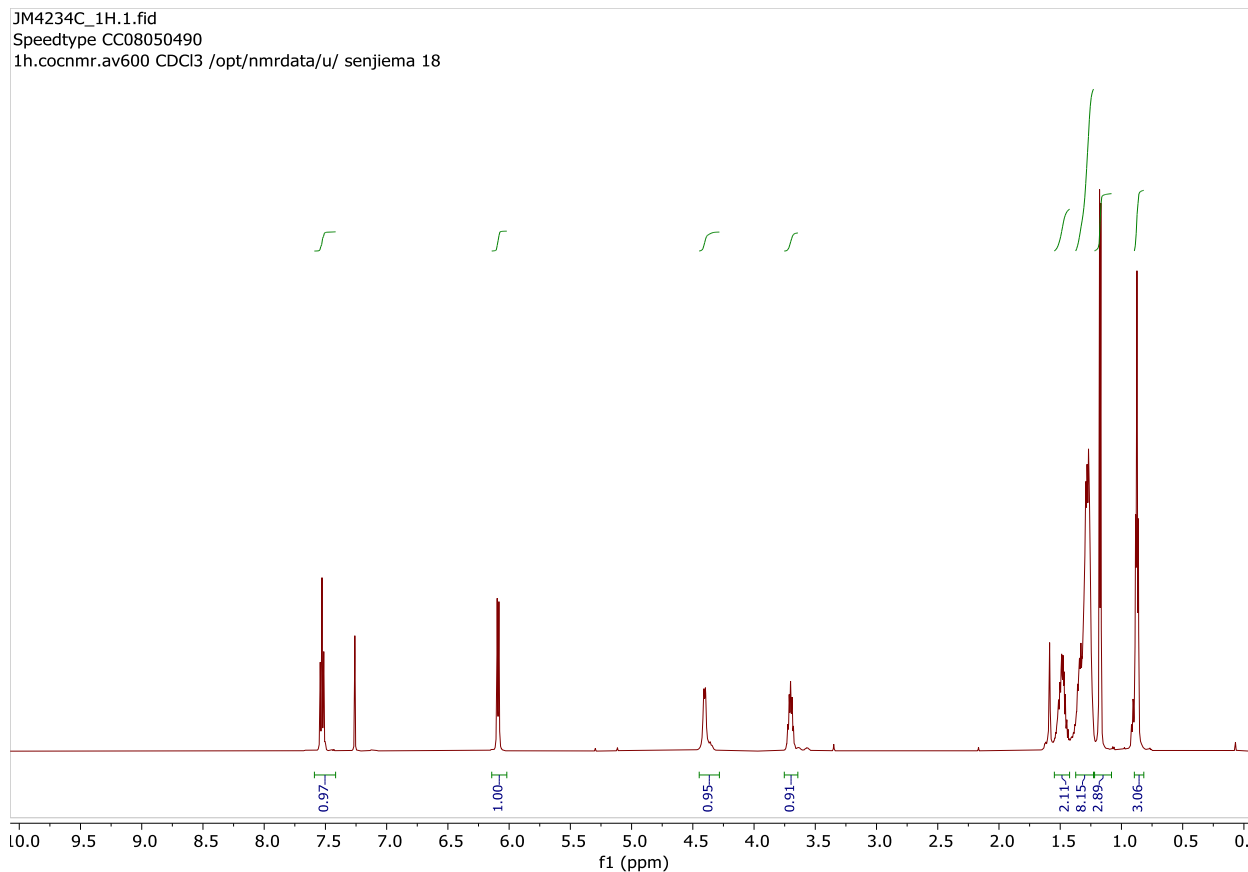

**<sup>13</sup>C NMR**

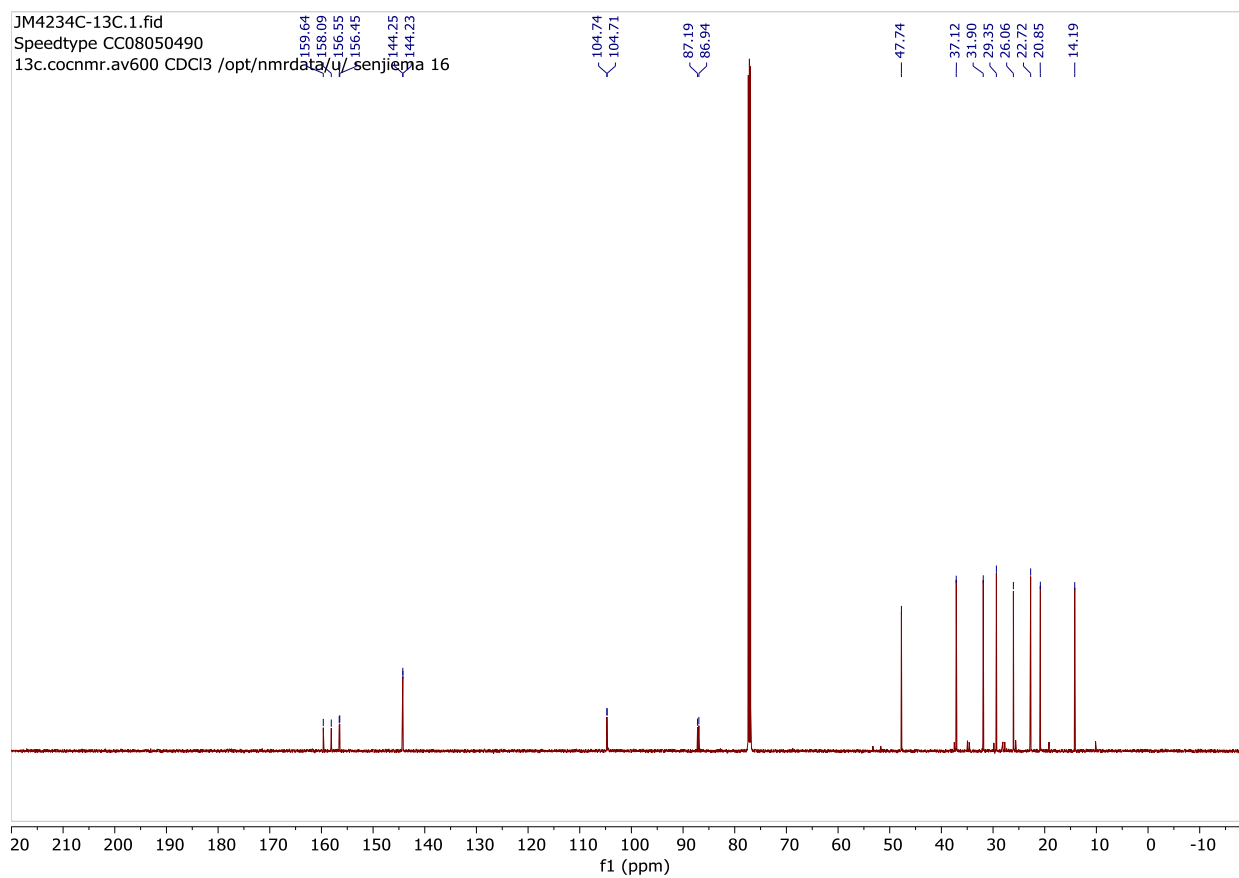

[Return to table of contents]

# <sup>19</sup>F NMR

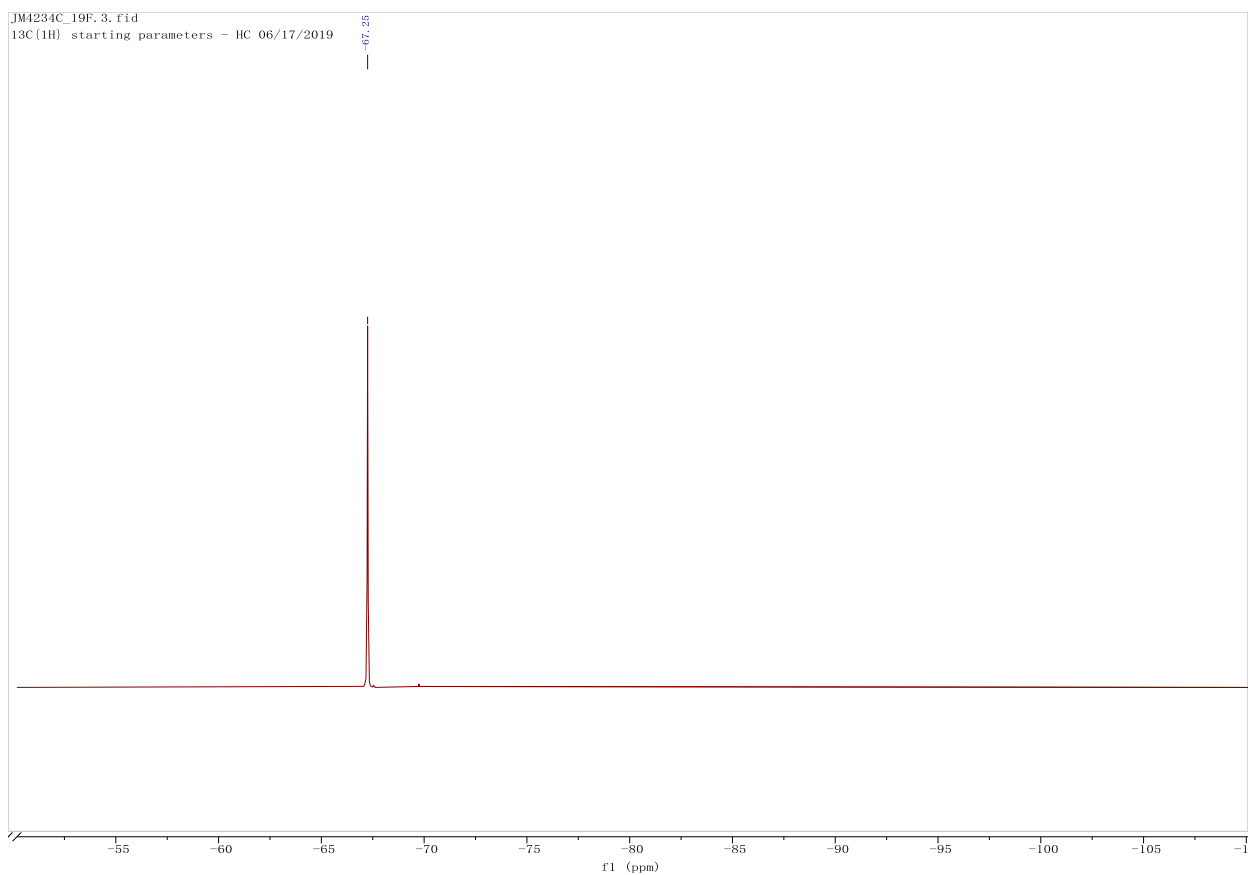

### Compound 3ag

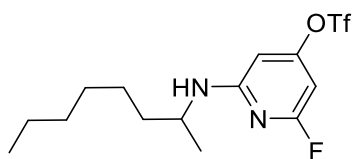

### <sup>1</sup>H NMR

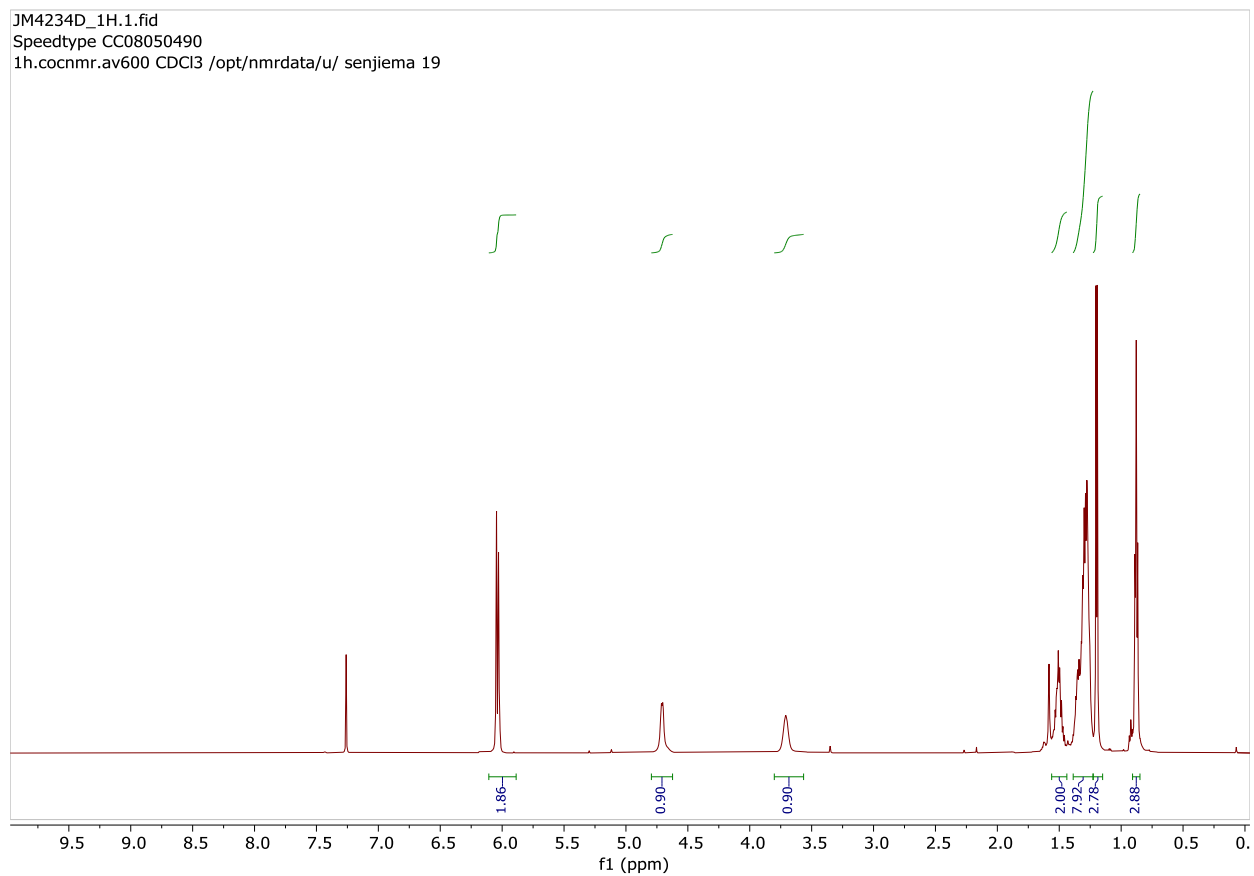



# <sup>13</sup>C NMR

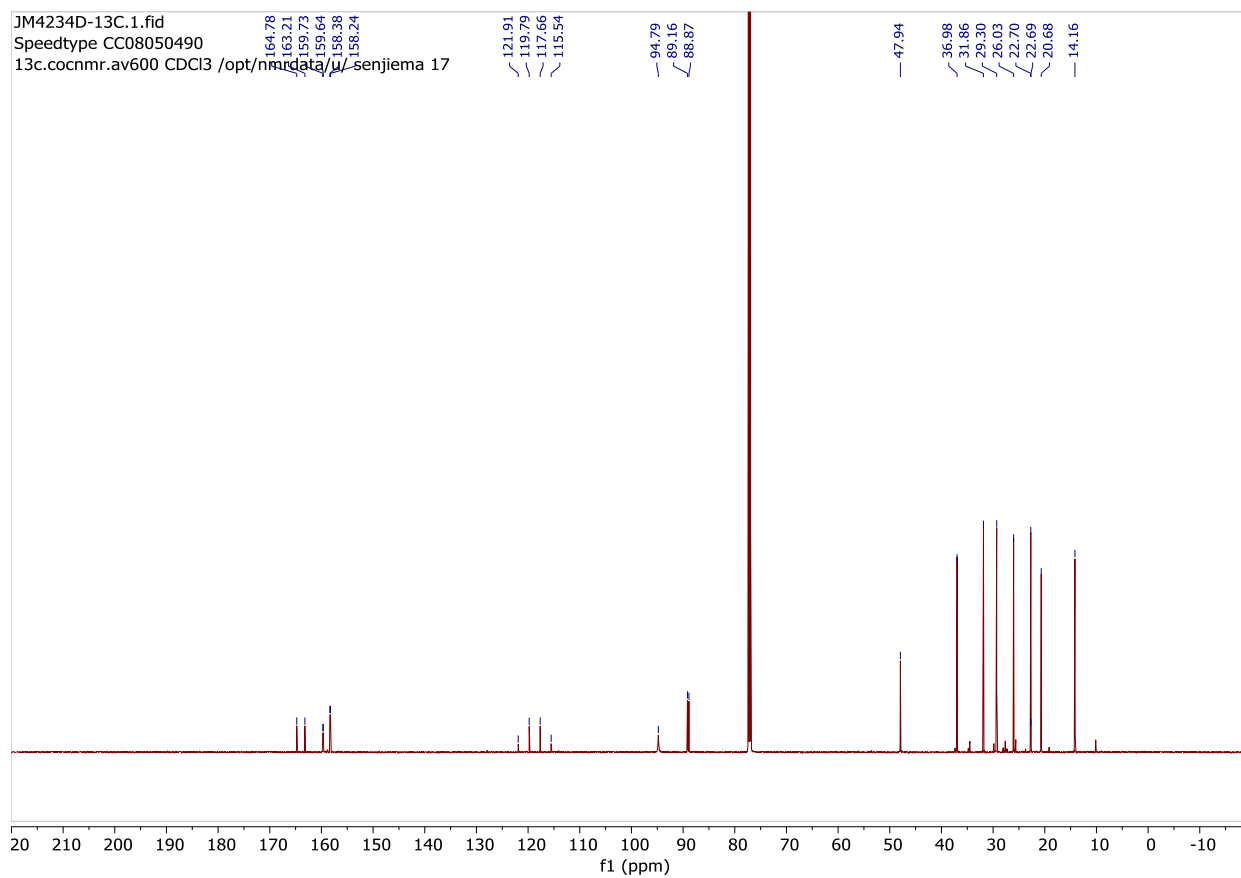

[Return to table of contents]

# <sup>19</sup>F NMR

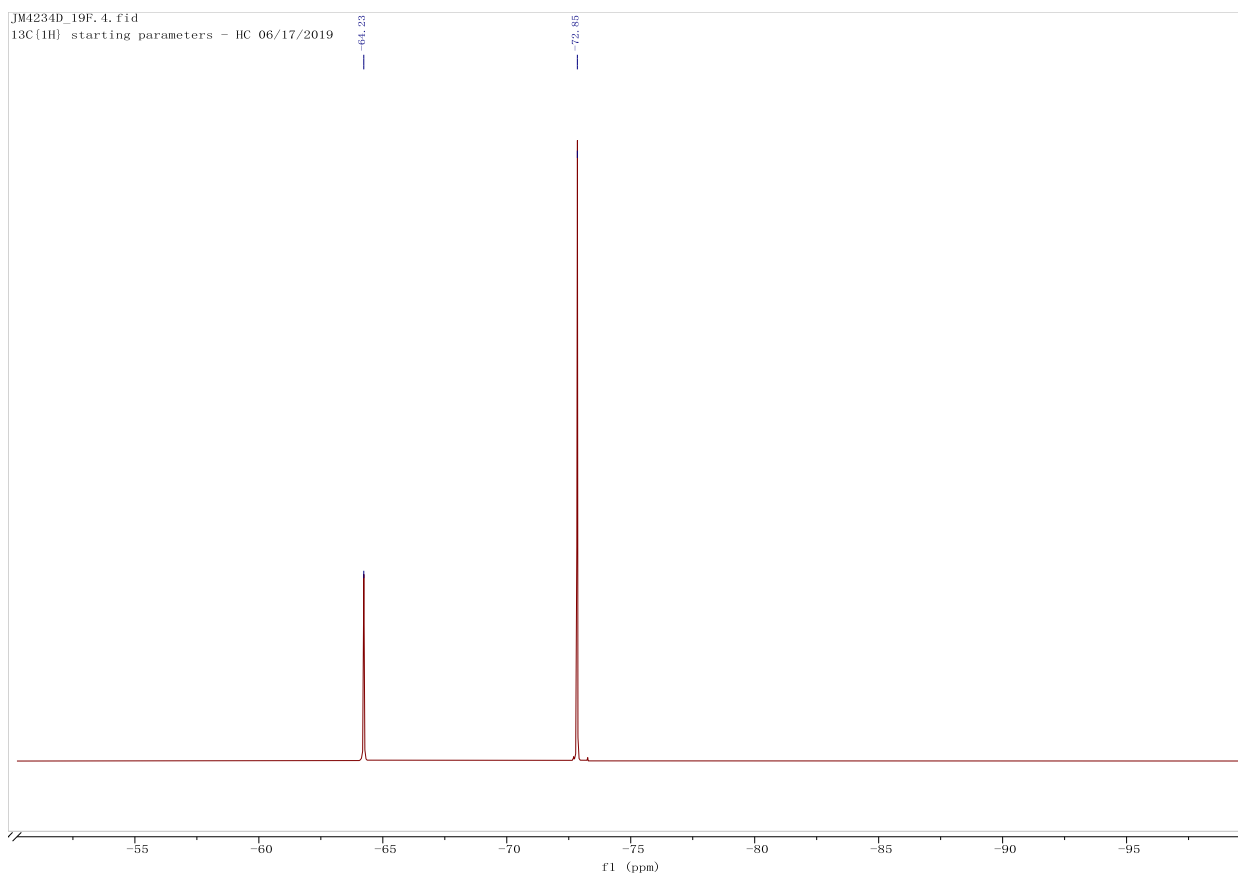

### Compound 3ah

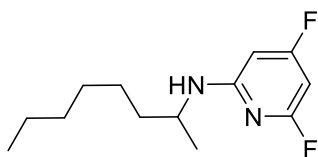

### <sup>1</sup>H NMR

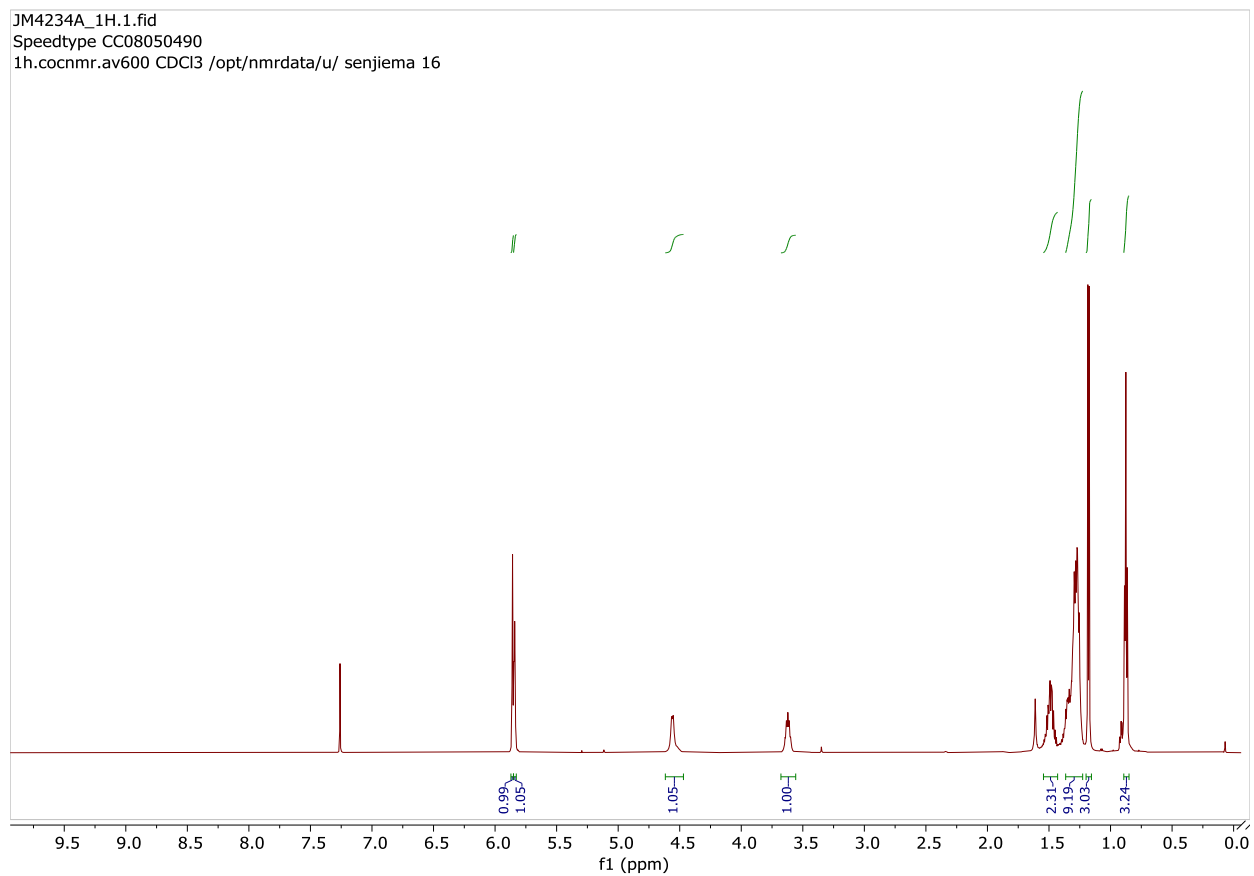

# <sup>13</sup>C NMR

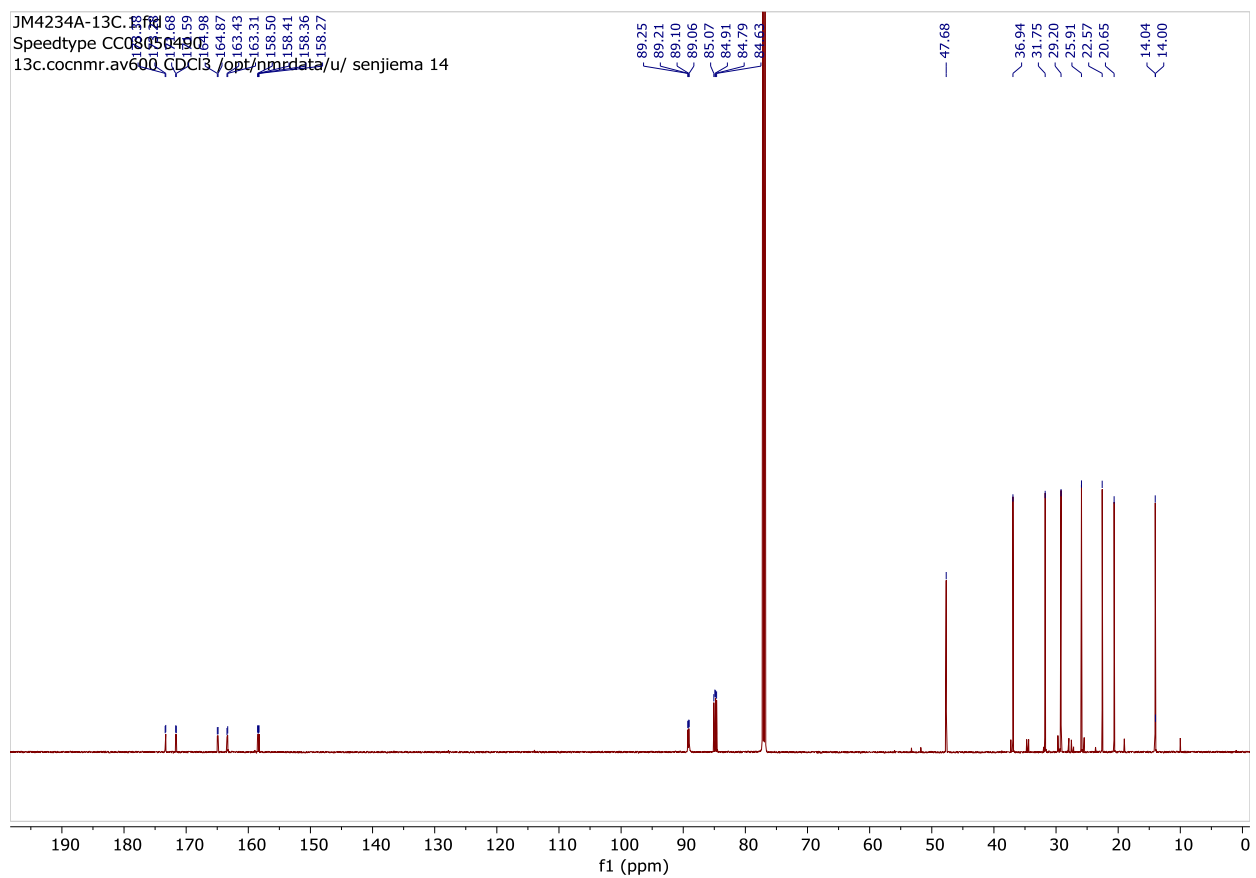

**<sup>19</sup>F NMR**

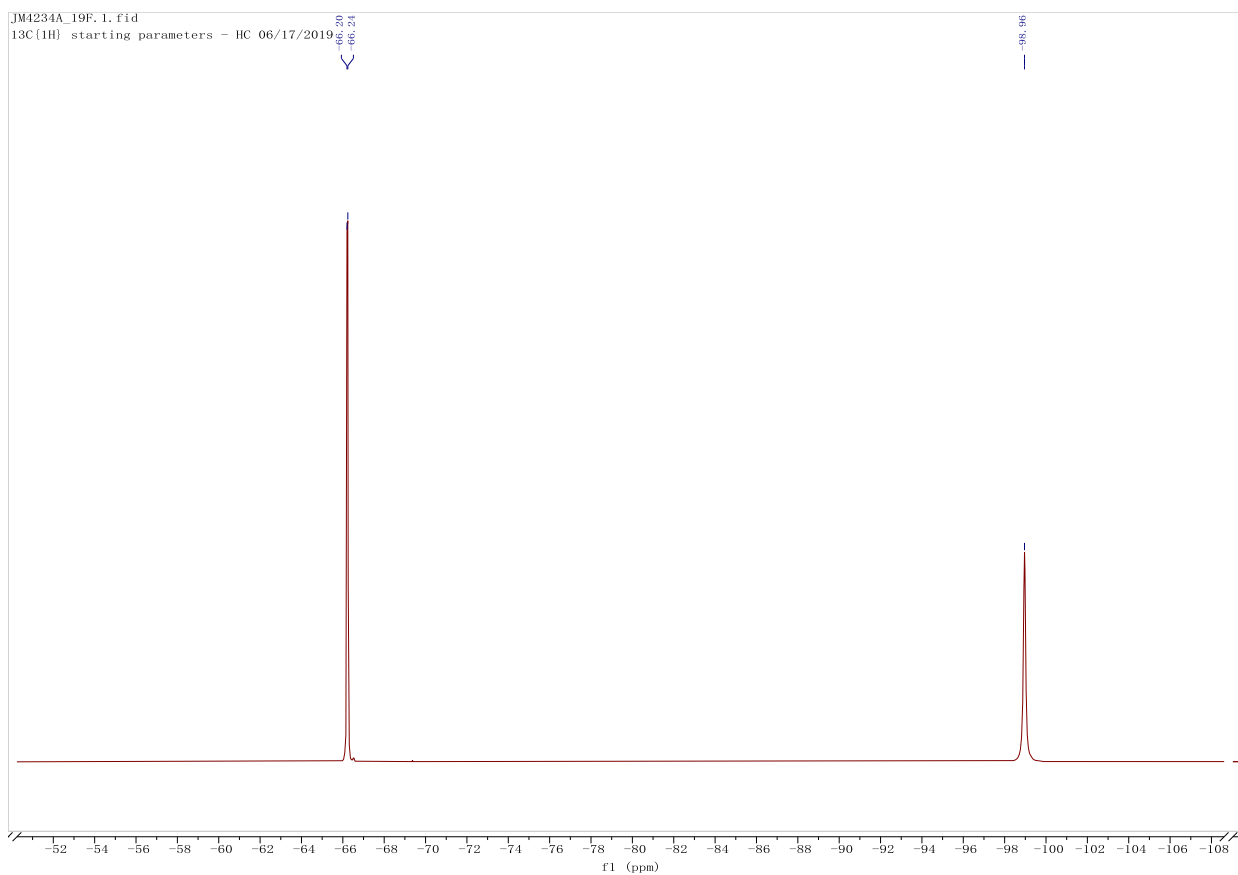

### Compound 3ai

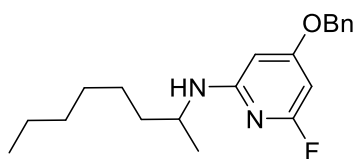

### <sup>1</sup>H NMR

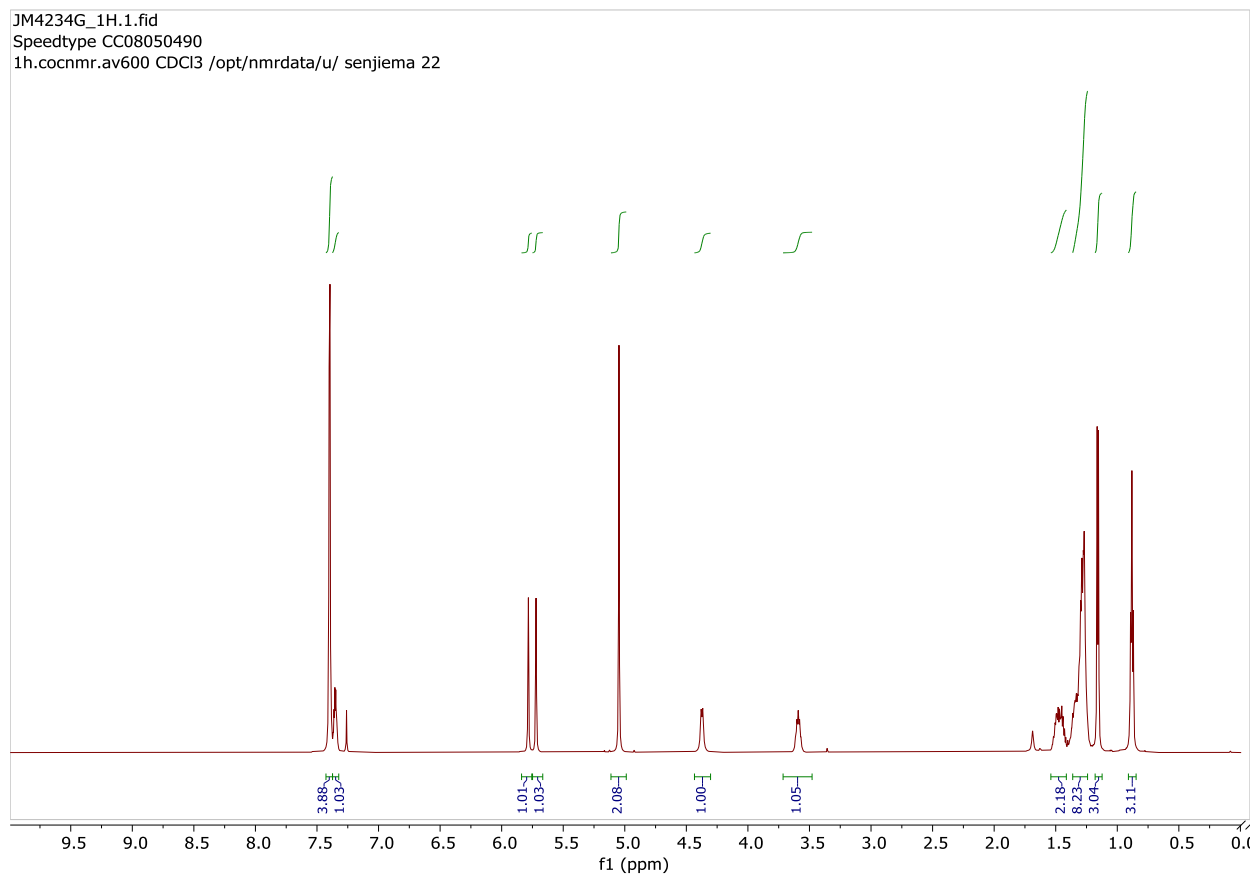

# <sup>13</sup>C NMR

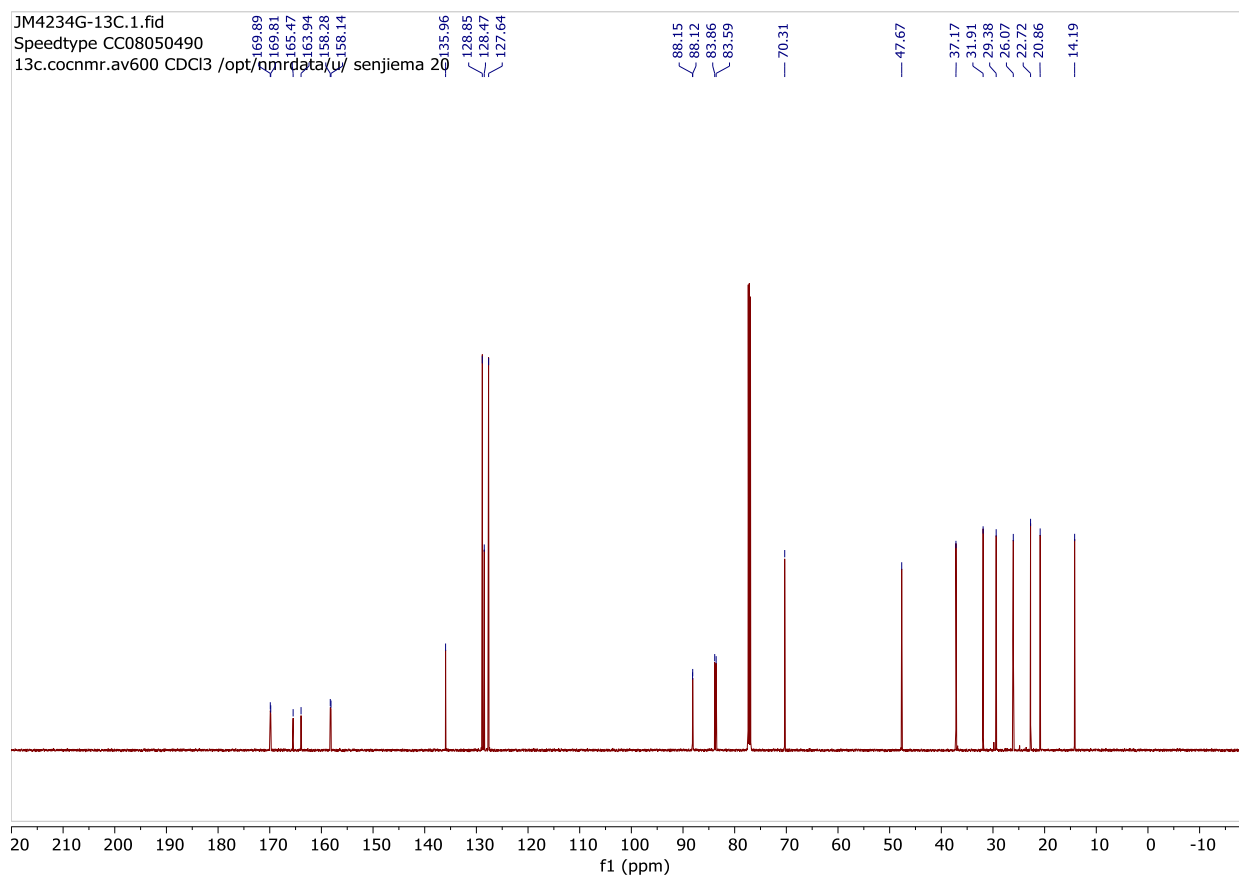

[Return to table of contents]

# <sup>19</sup>F NMR

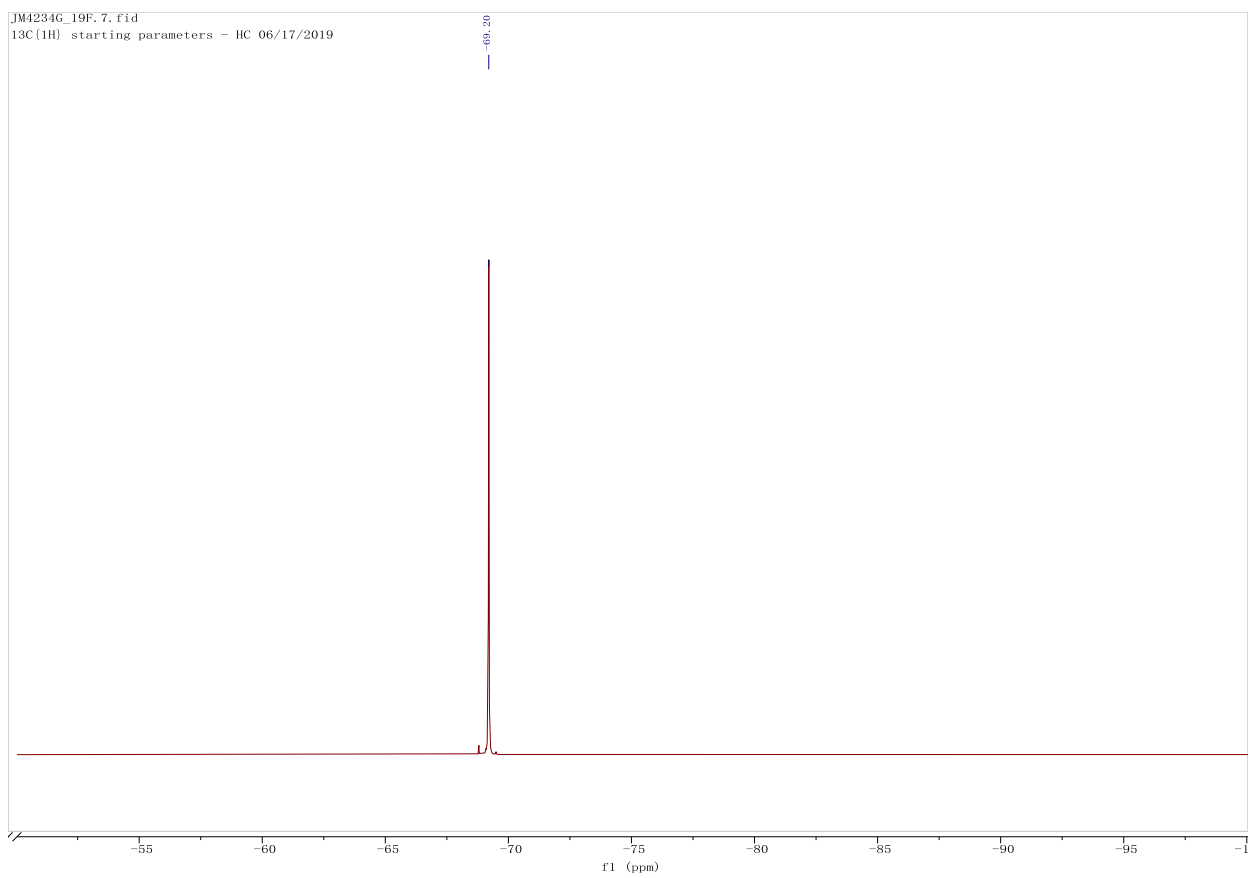



### Compound 3aj

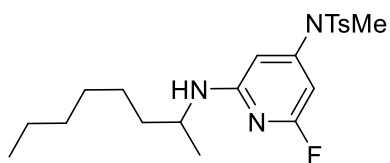

### <sup>1</sup>H NMR

JM4245H\_1H.1.fid  
Speedtype CC08050490  
1h.cocnmr.av600 CDCl3 /opt/nmrdata/u/ senjiema 13

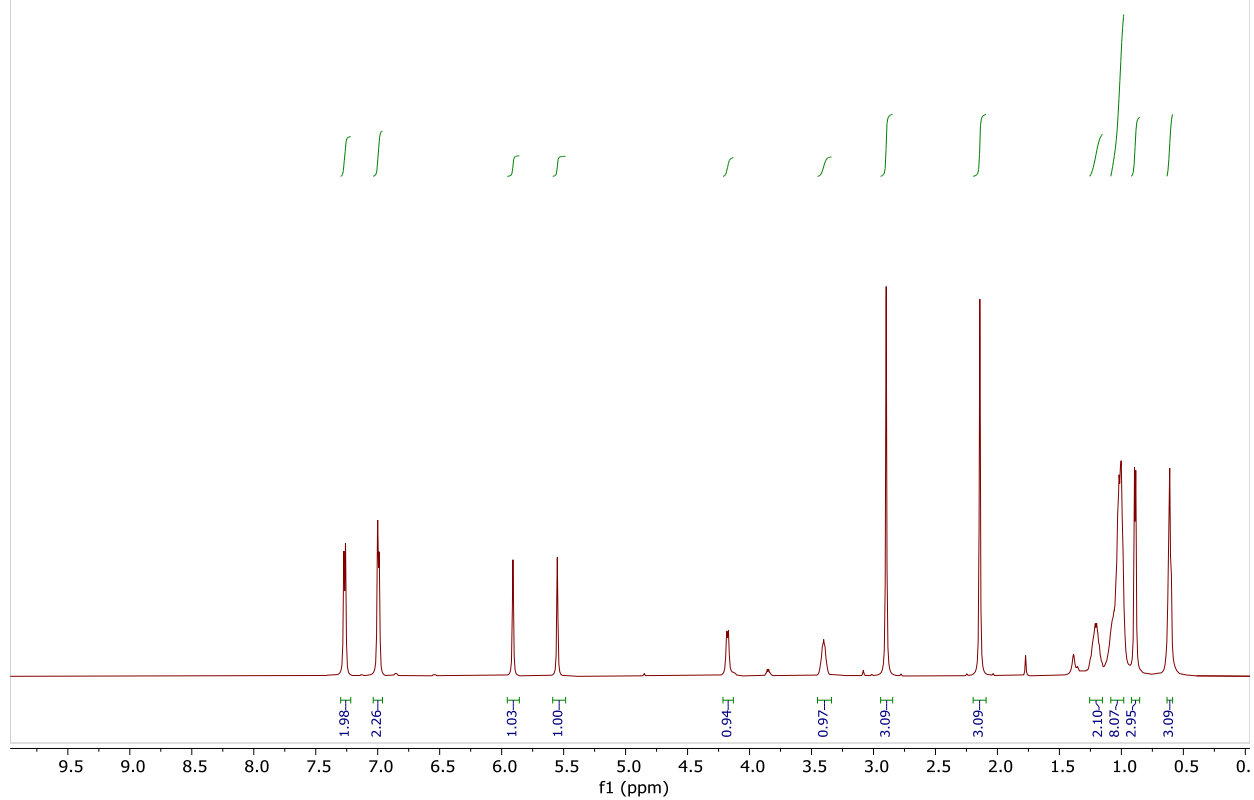

# <sup>13</sup>C NMR

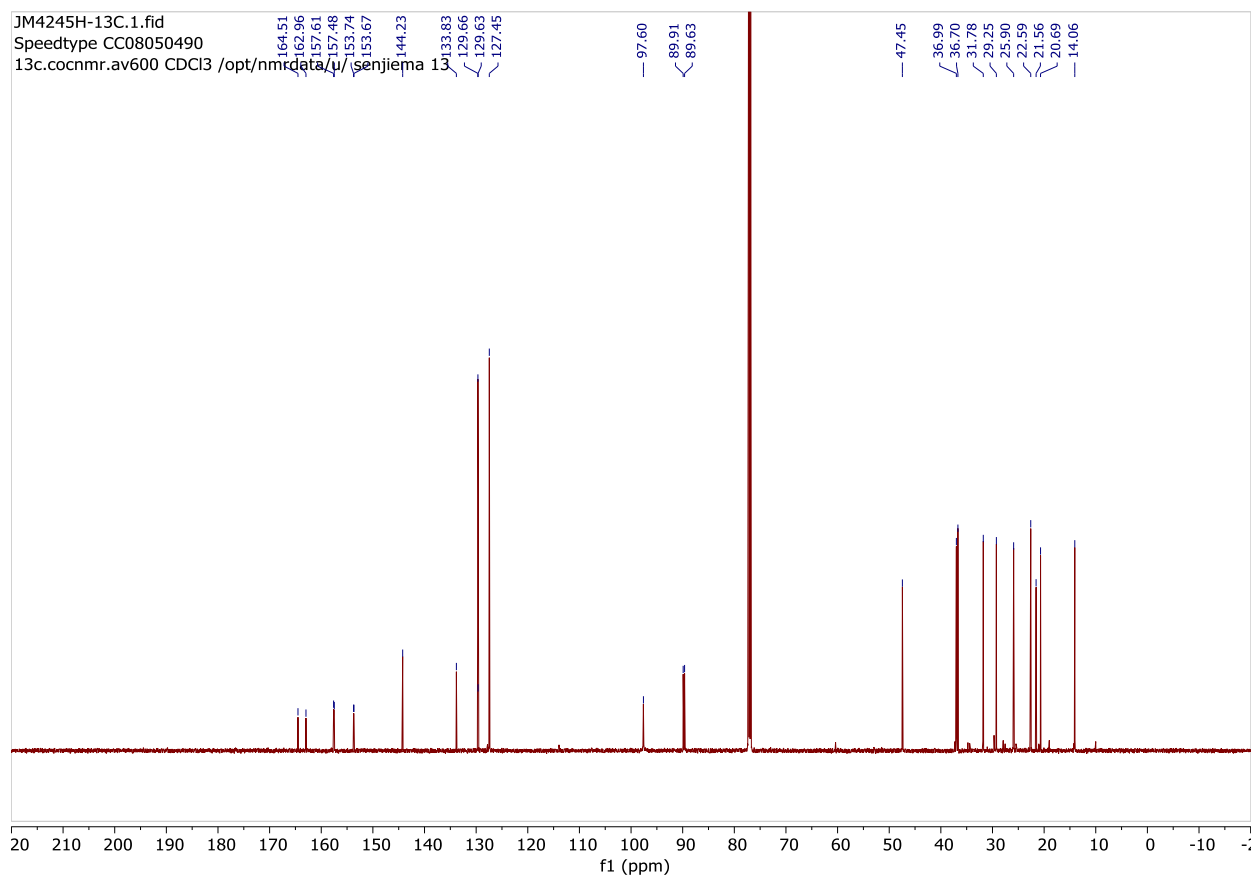

**<sup>19</sup>F NMR**

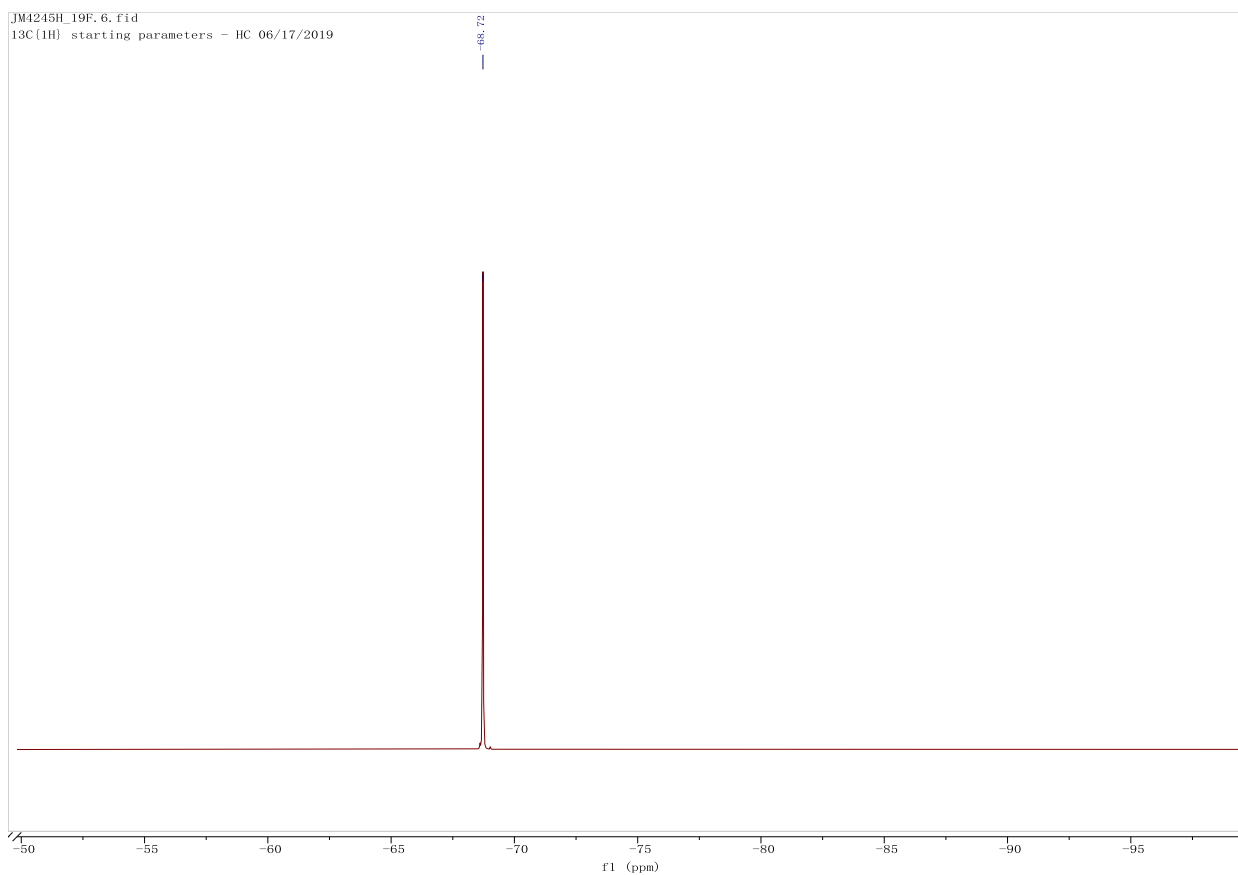

## Compound 3ak

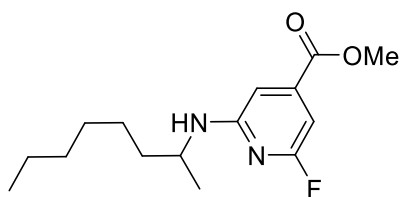

## <sup>1</sup>H NMR

JM4234F\_1H.1.fid  
Speedtype CC08050490  
1h.cocnmr.av600 CDCl<sub>3</sub> /opt/nmrdata/u/ senjiema 21

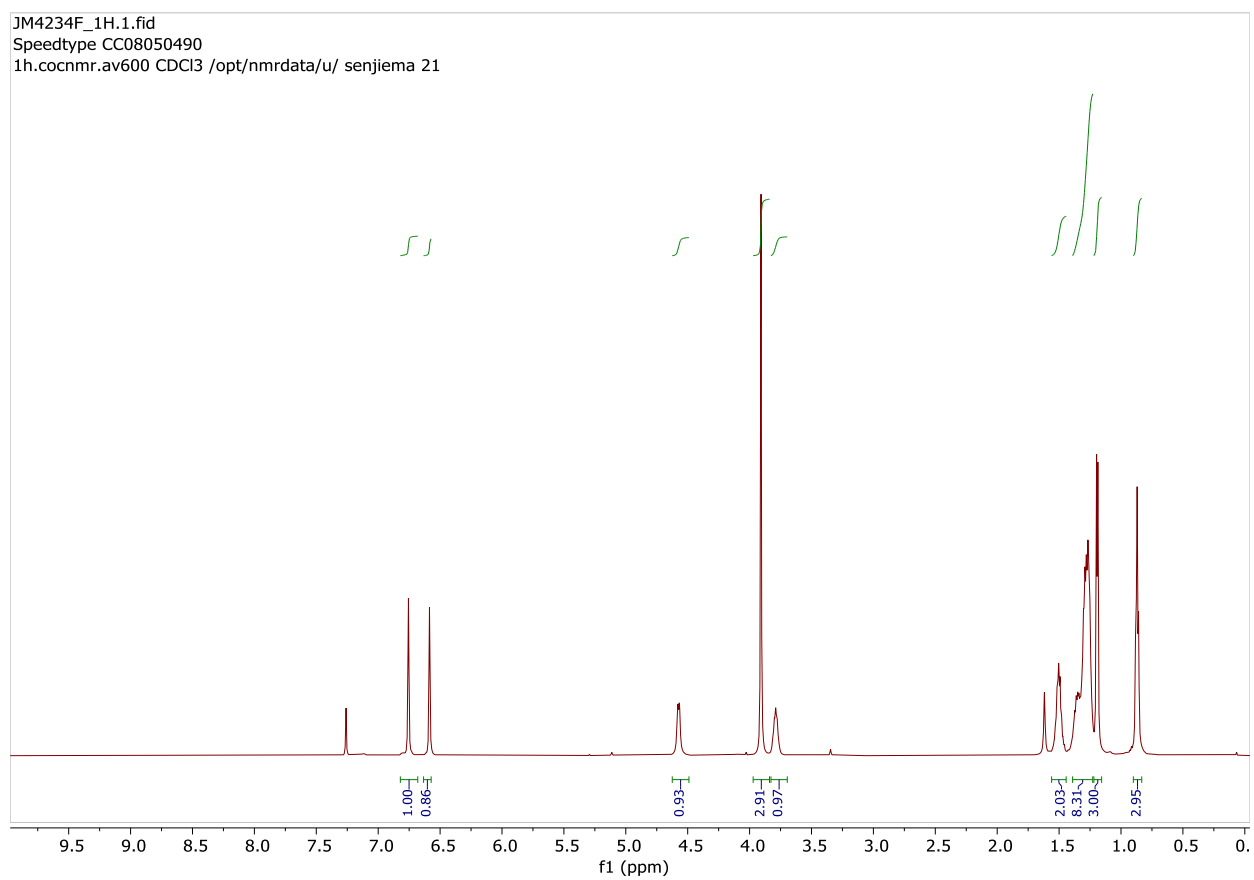

### <sup>13</sup>C NMR

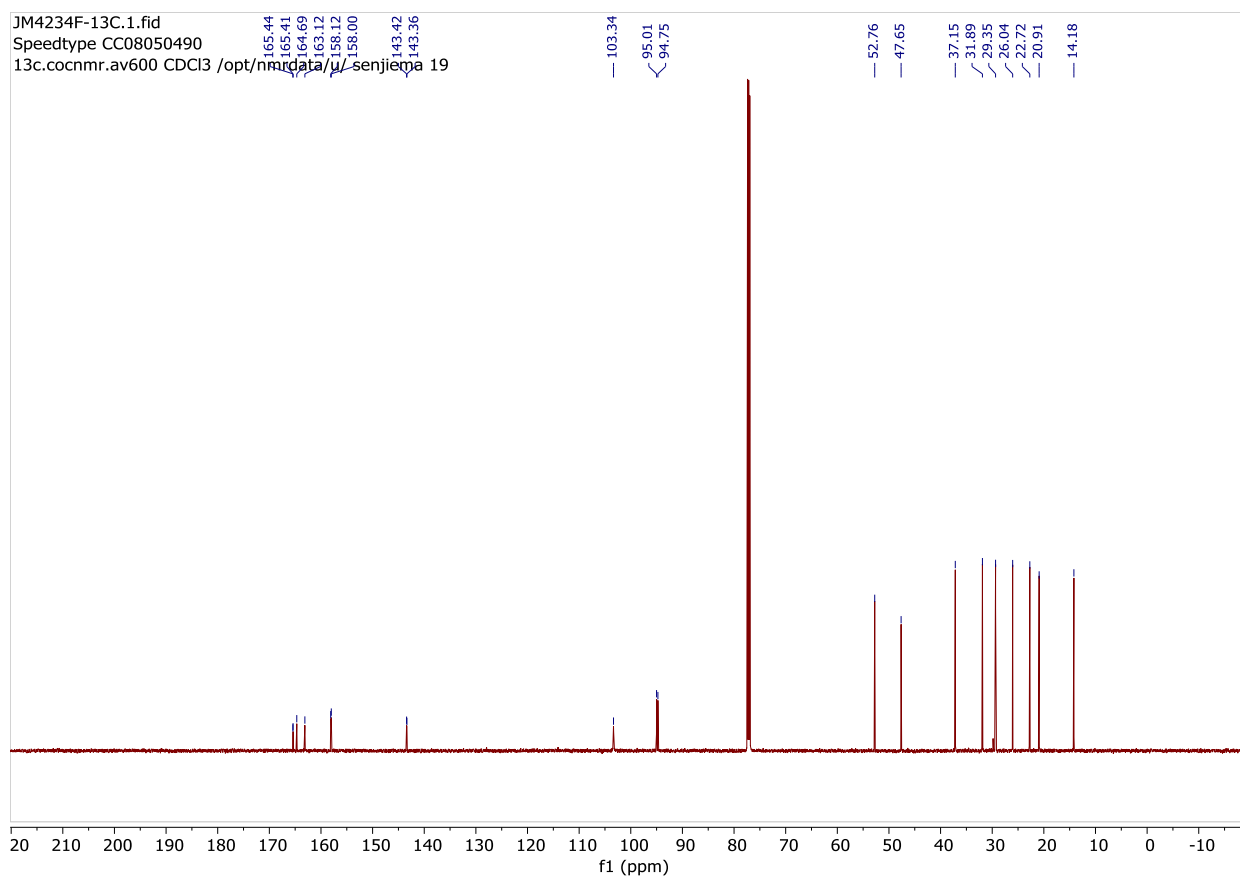

[Return to table of contents]

## <sup>19</sup>F NMR

JM4234F\_19F.6.fid

13C(1H) starting parameters - HC 06/17/2019

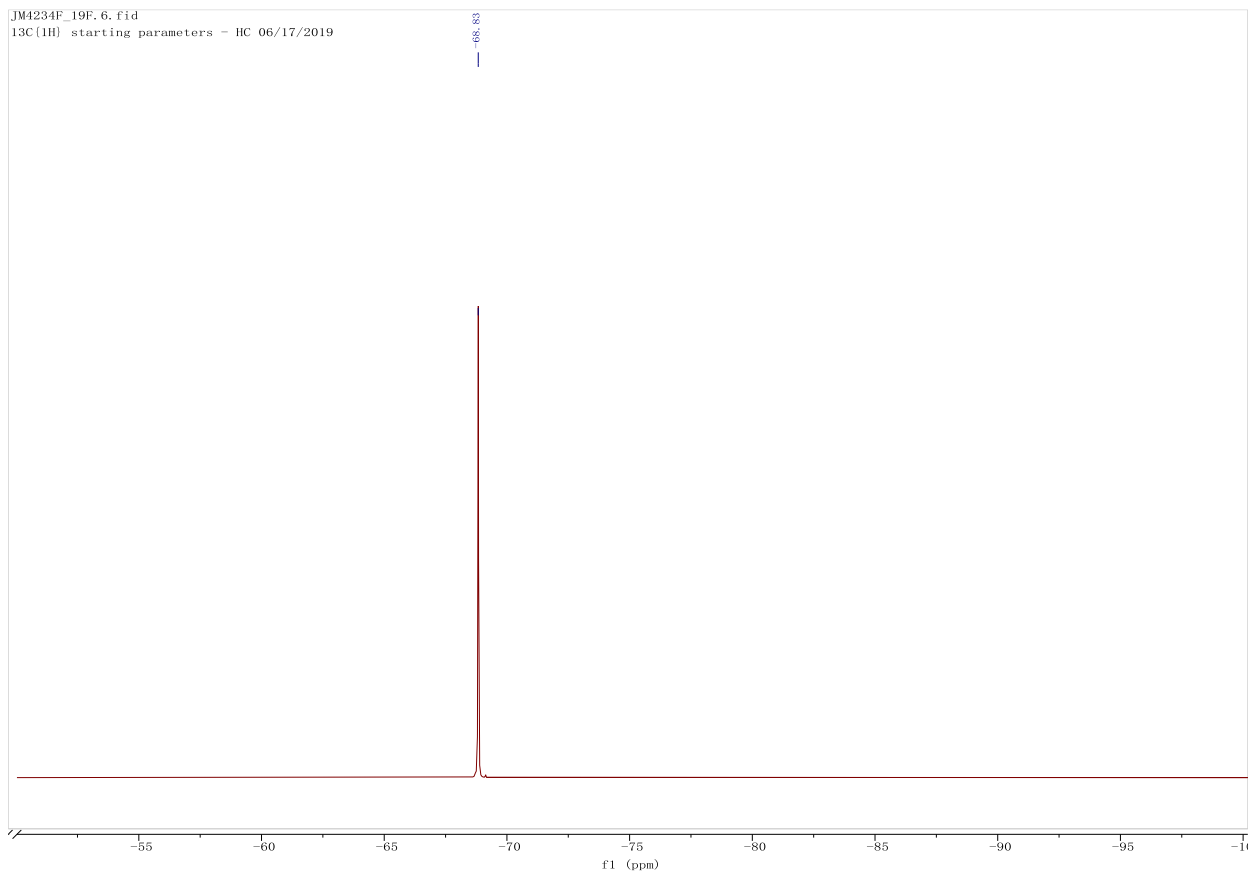

### Compound 3al

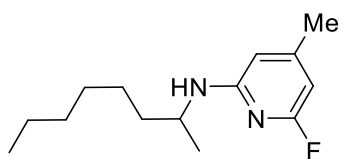

### <sup>1</sup>H NMR

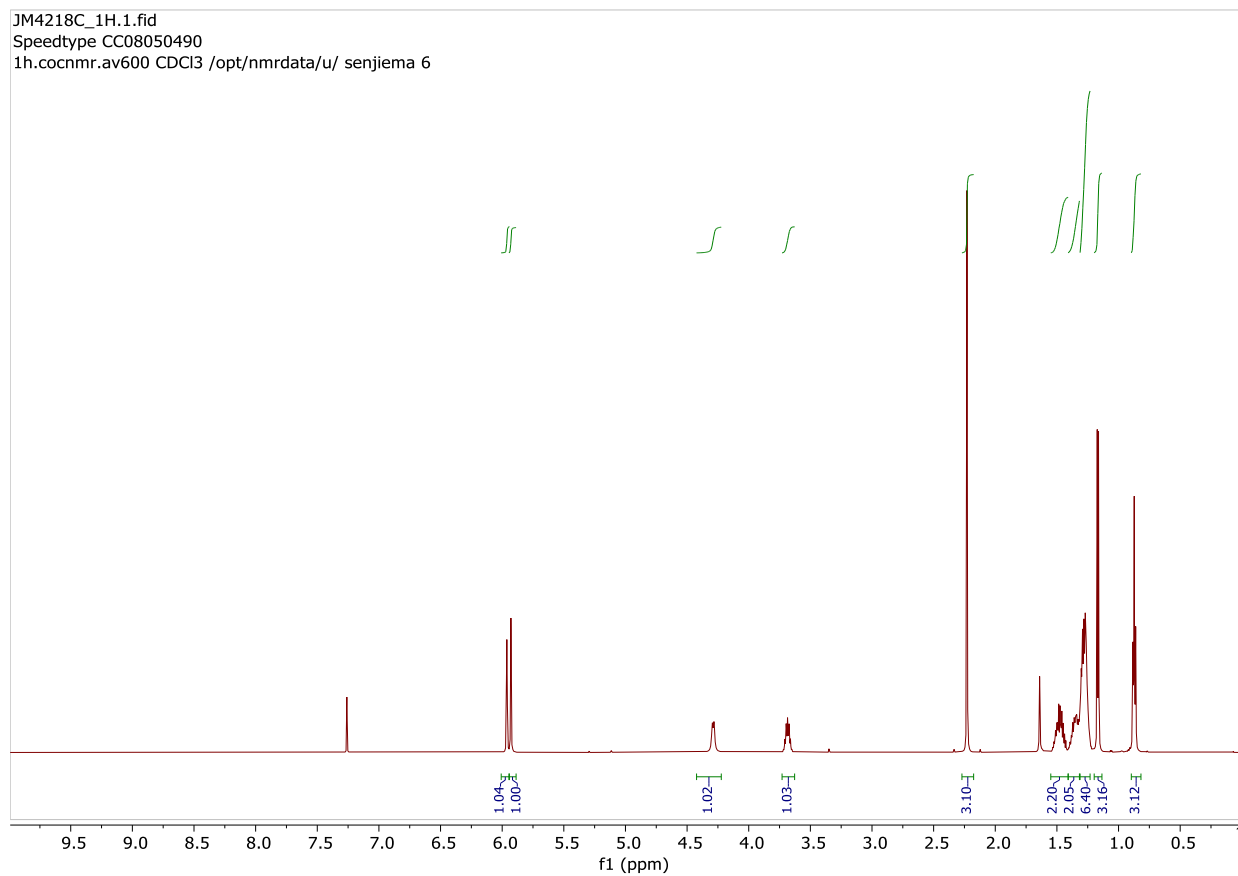

# <sup>13</sup>C NMR

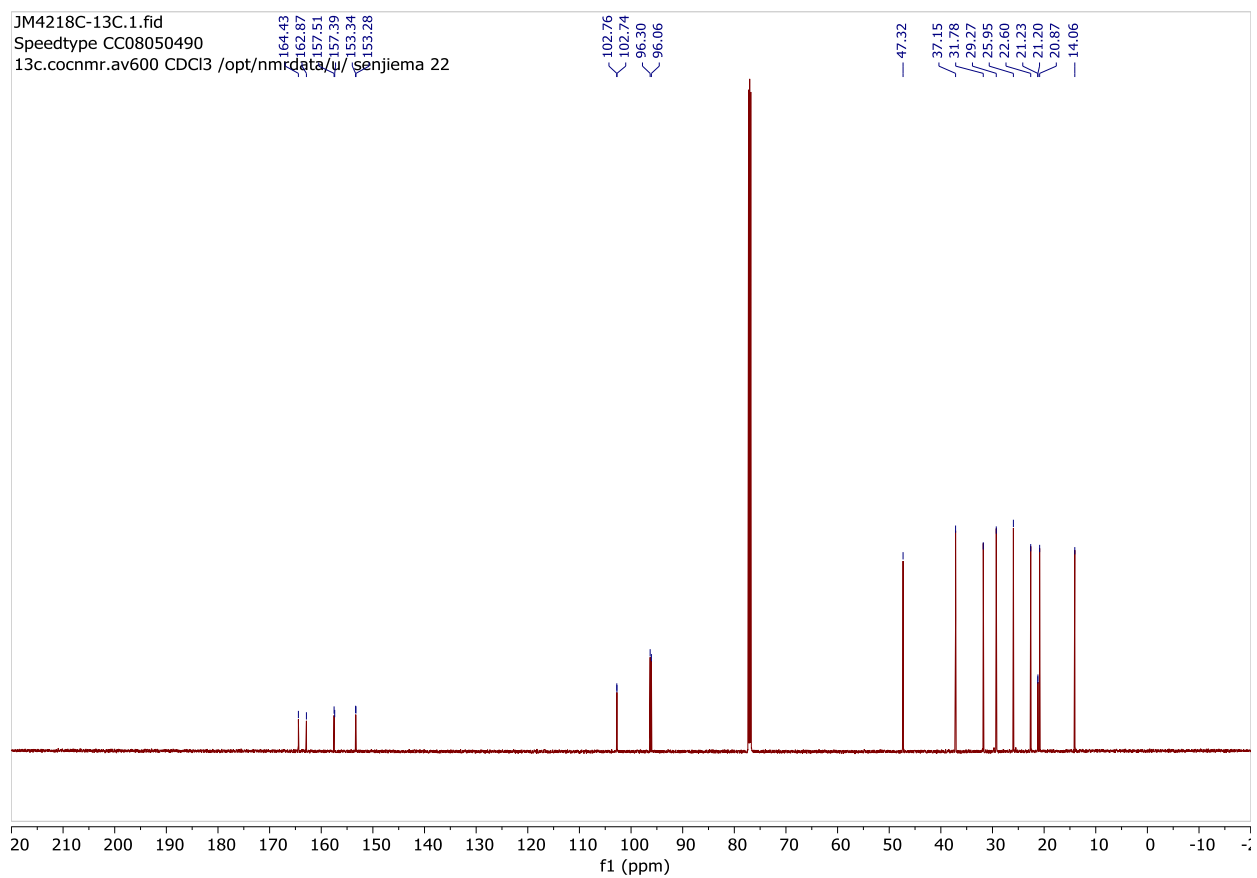



[Return to table of contents]

# <sup>19</sup>F NMR

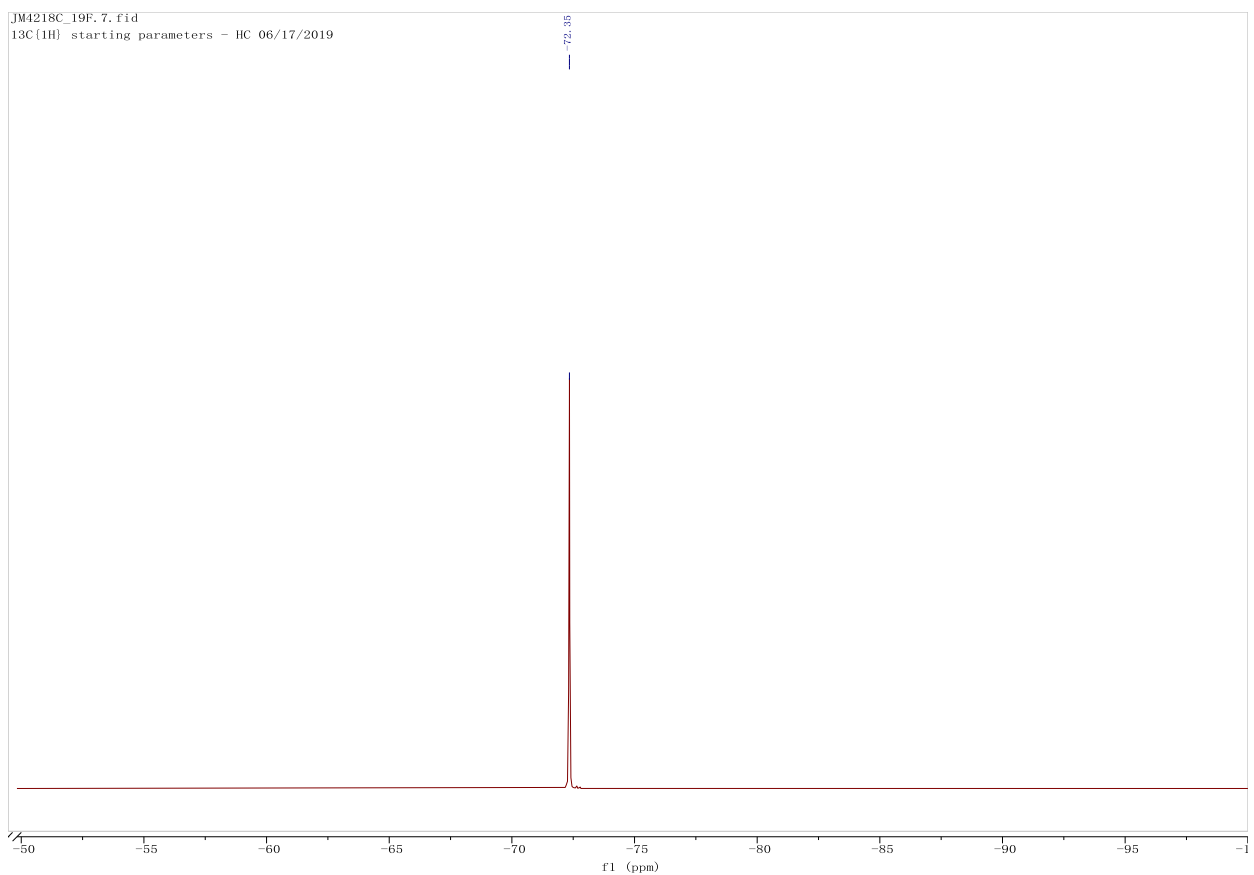

### Compound 3am

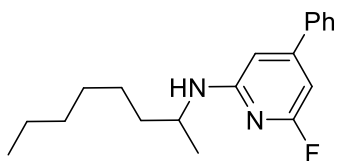

### <sup>1</sup>H NMR

JM4245A\_1H.1.fid  
Speedtype CC08050490  
1h.cocnmr.av600 CDCl3 /opt/nmrdata/u/ senjiema 8

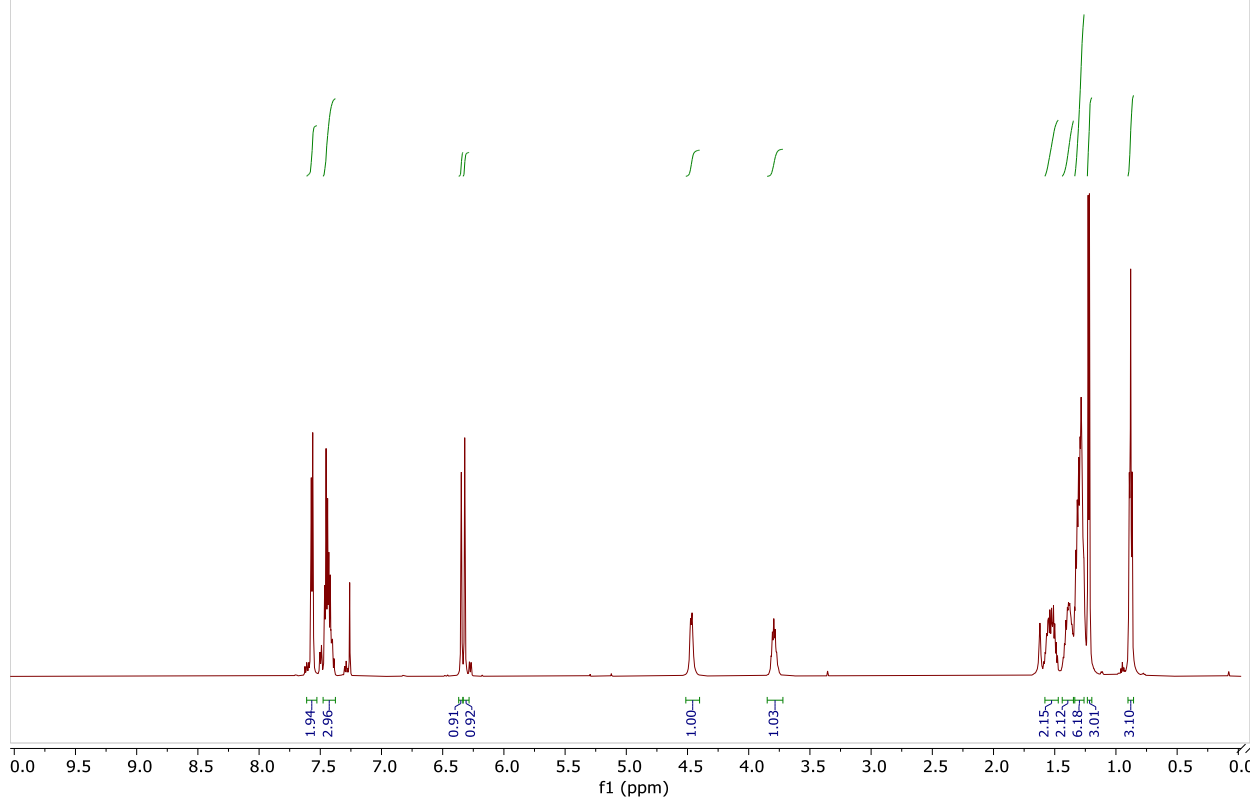

**<sup>13</sup>C NMR**

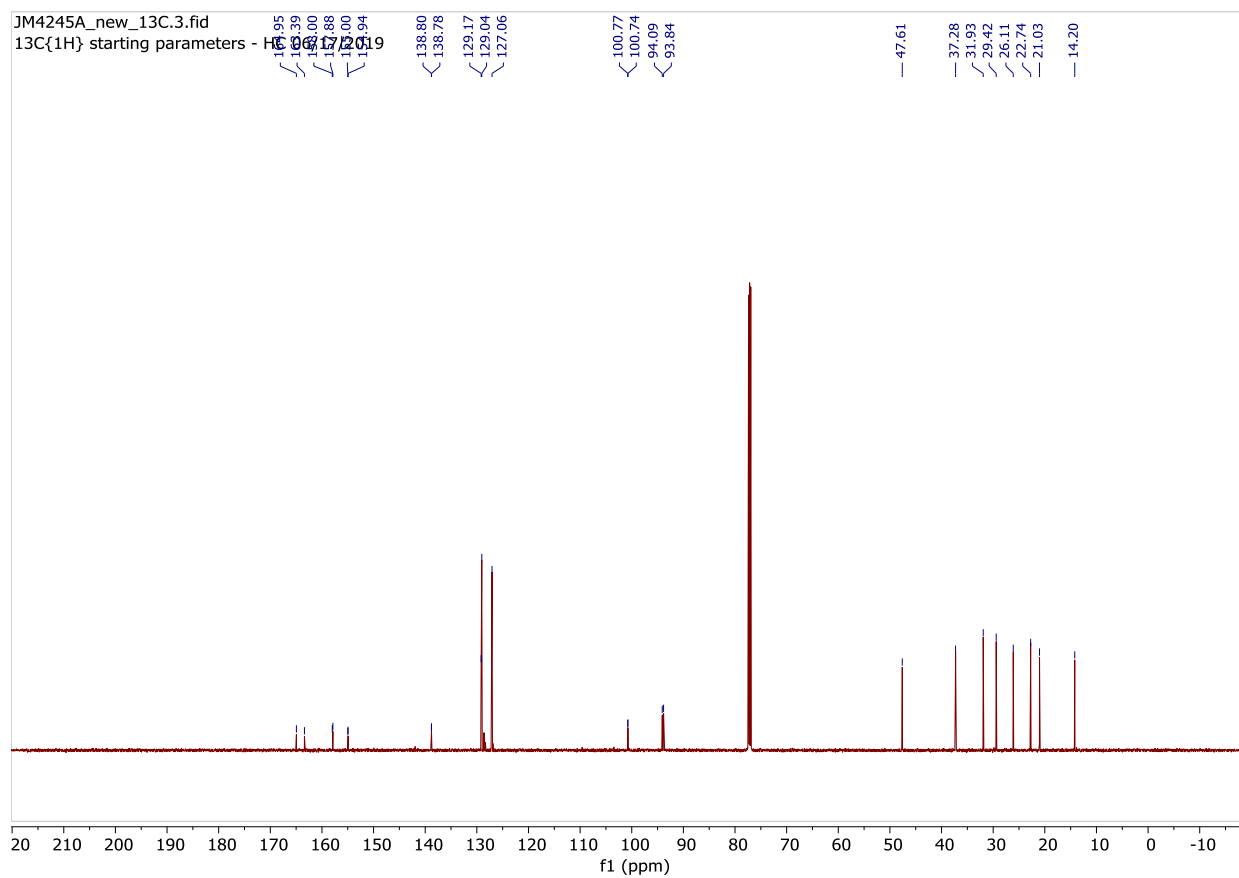

[Return to table of contents]

# <sup>19</sup>F NMR

JM4245A\_19F.10.fid  
Speedtype CC08050715

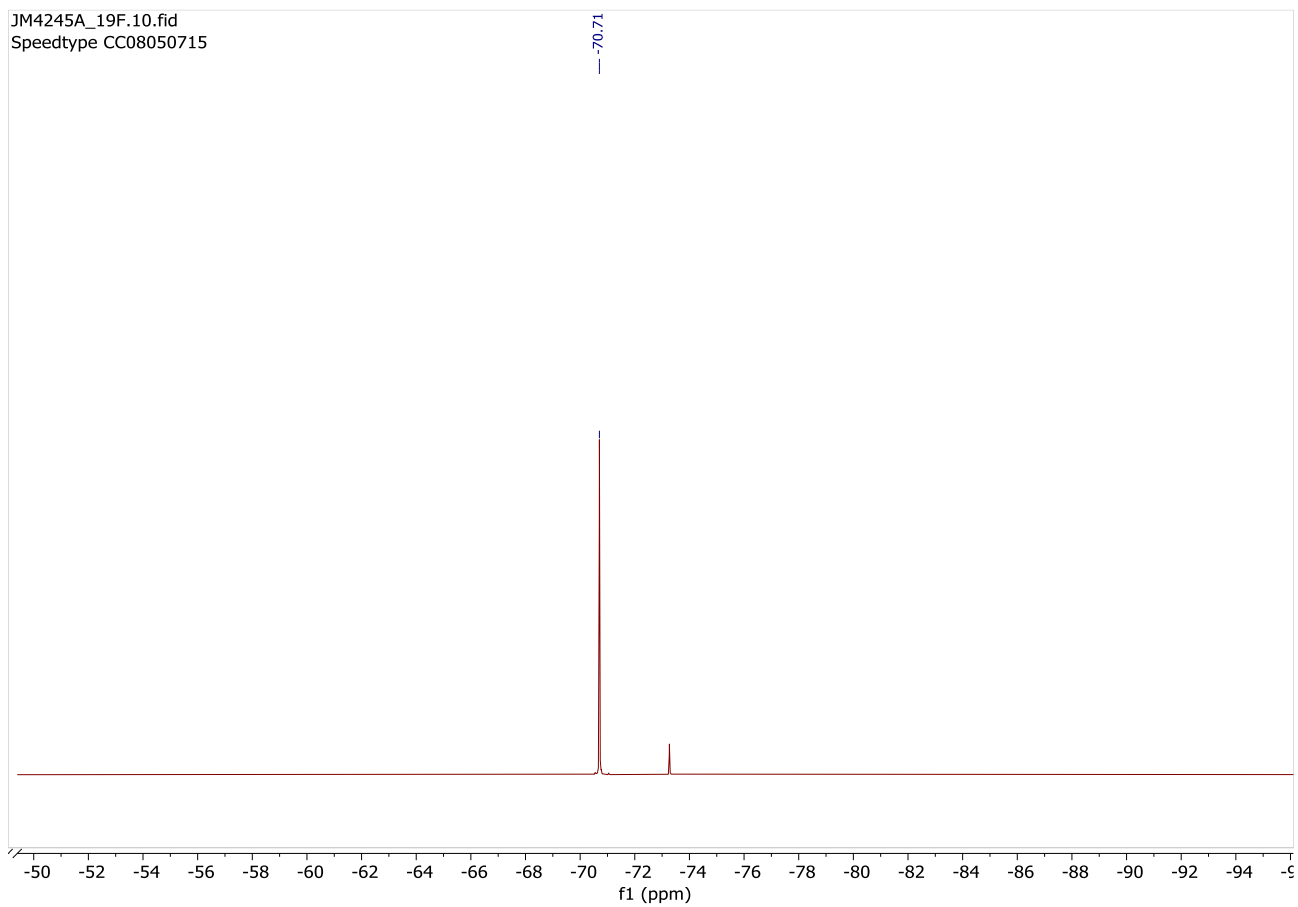

### Compound 3an

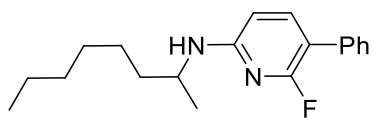

### <sup>1</sup>H NMR

JM4245B\_new\_1H.3.fid

13C{1H} starting parameters - HC 06/17/2019

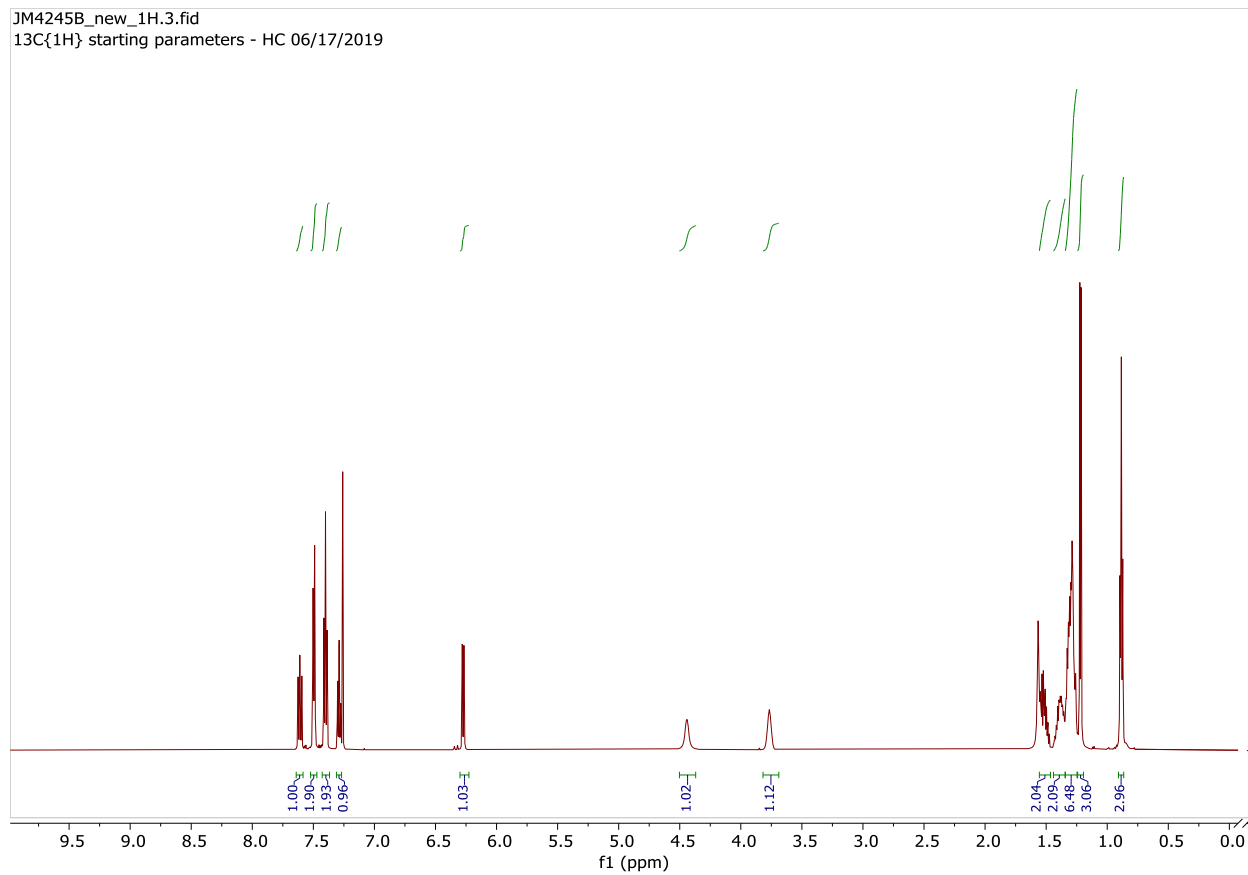

**<sup>13</sup>C NMR**

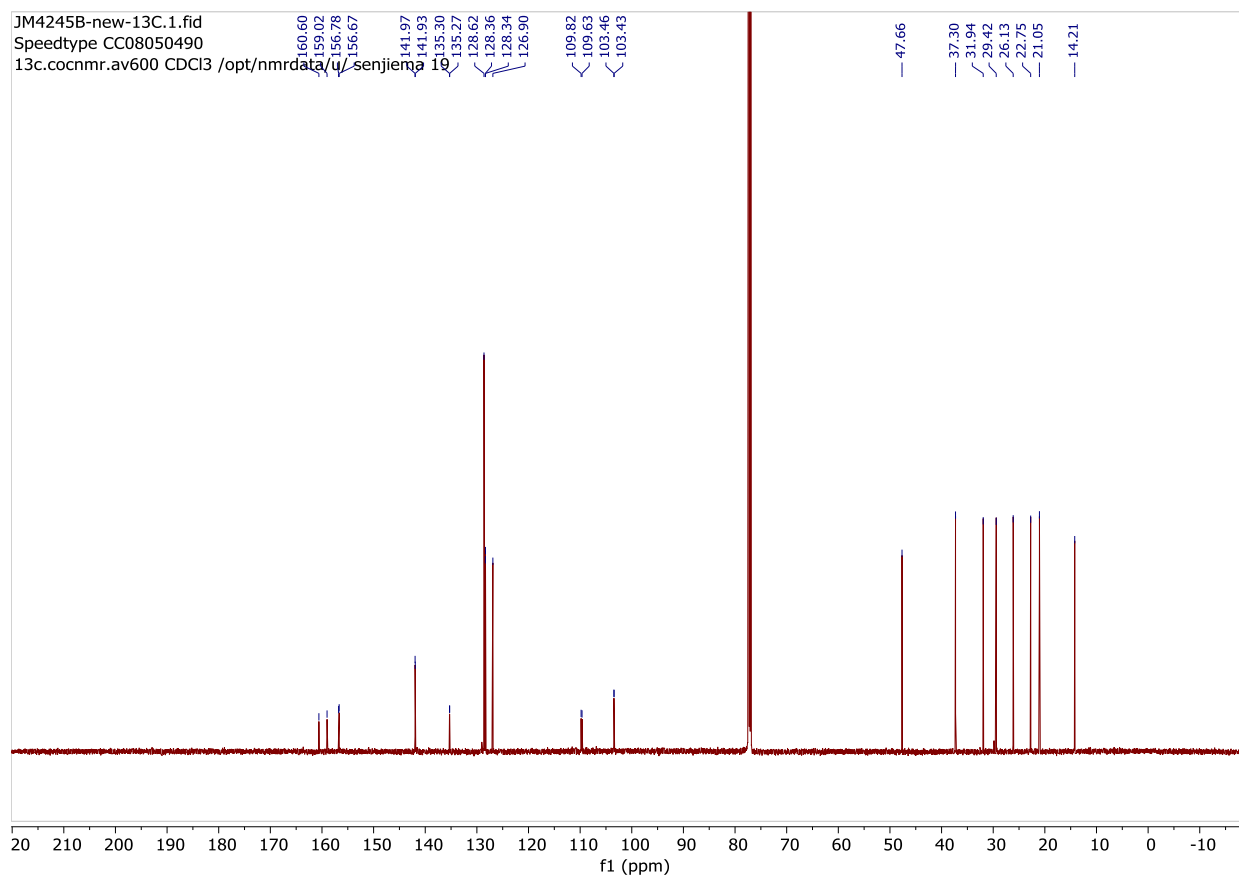

[Return to table of contents]

# <sup>19</sup>F NMR

JM4245B\_19F.10.fid  
Speedtype CC08050715

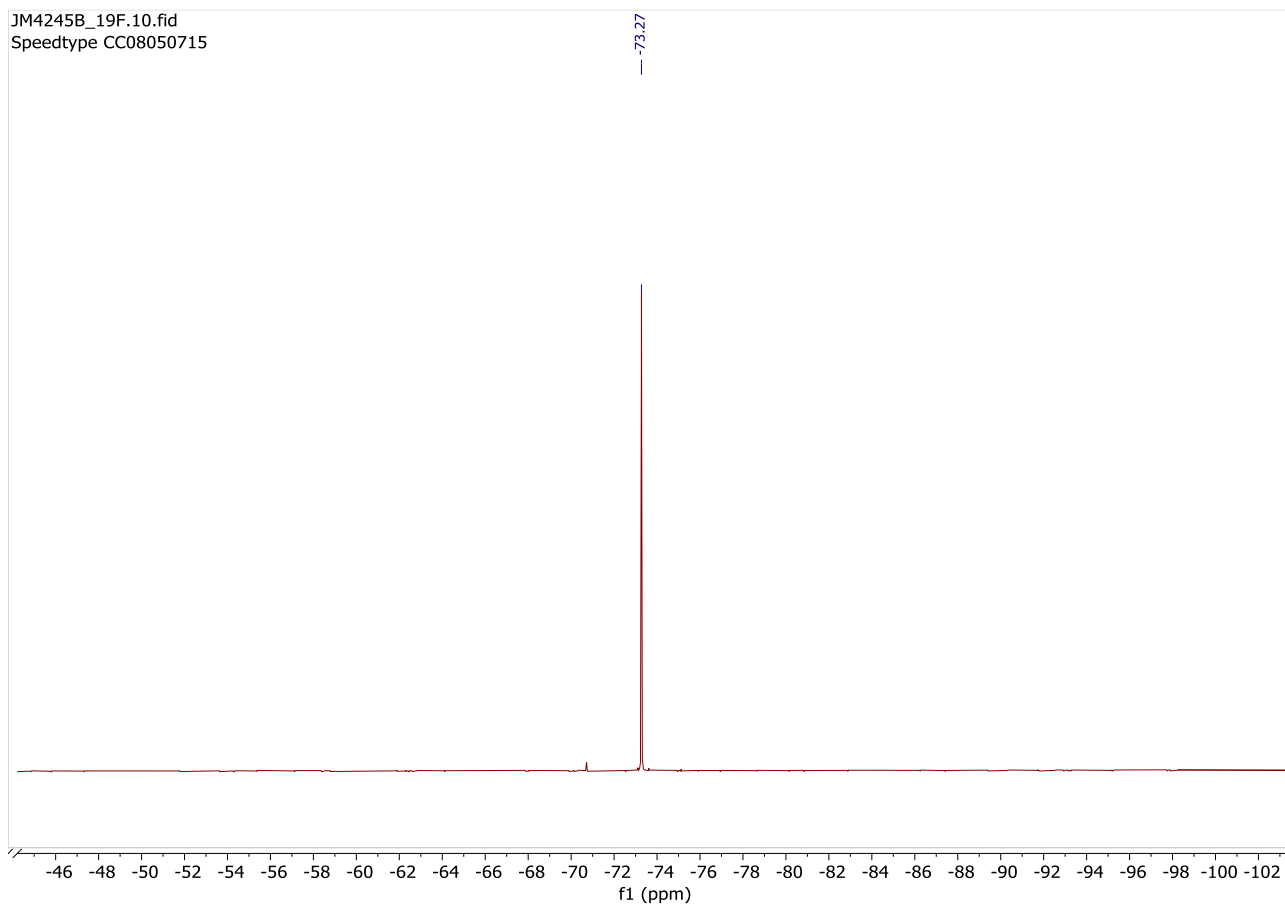

## Compound 3ao

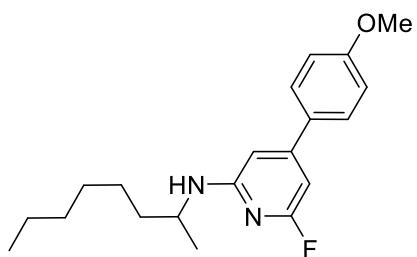

## <sup>1</sup>H NMR

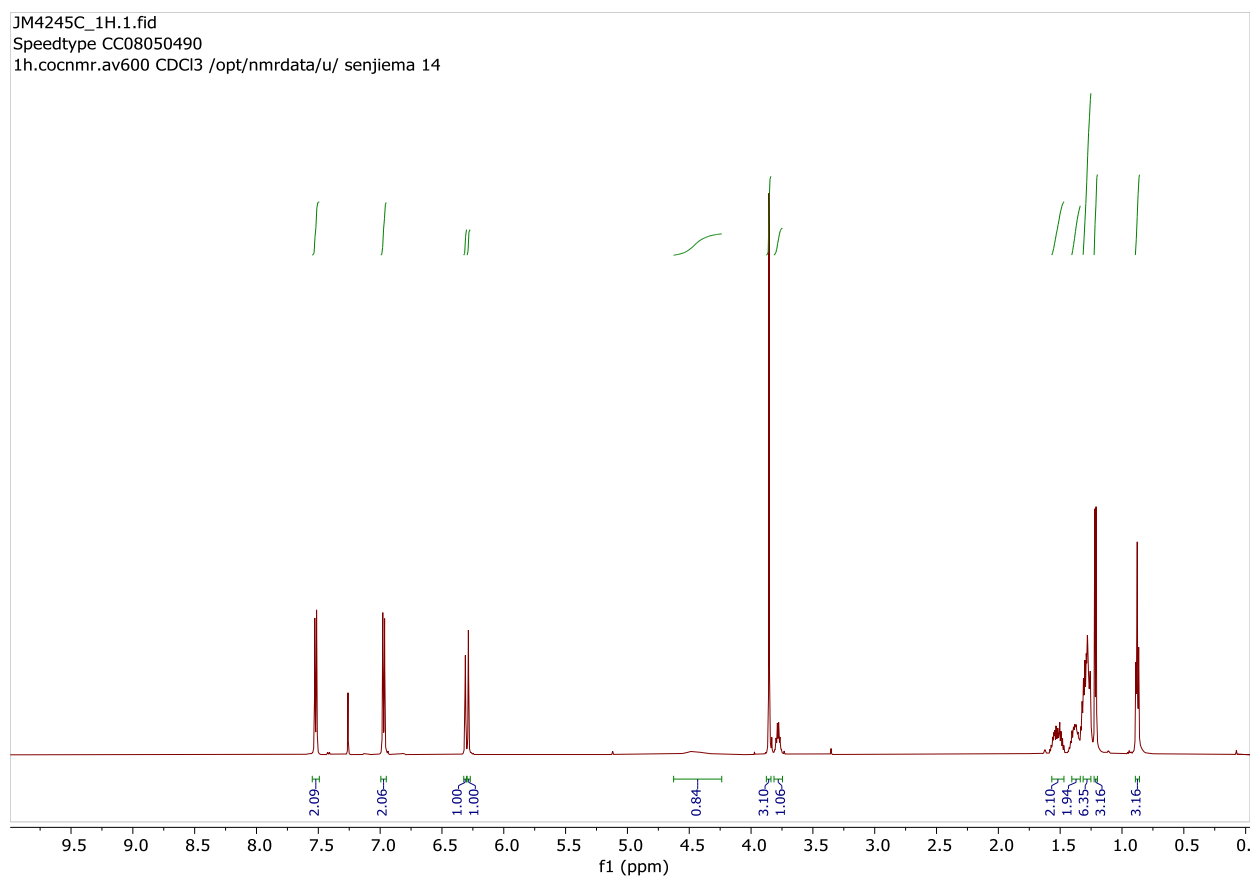



# <sup>13</sup>C NMR

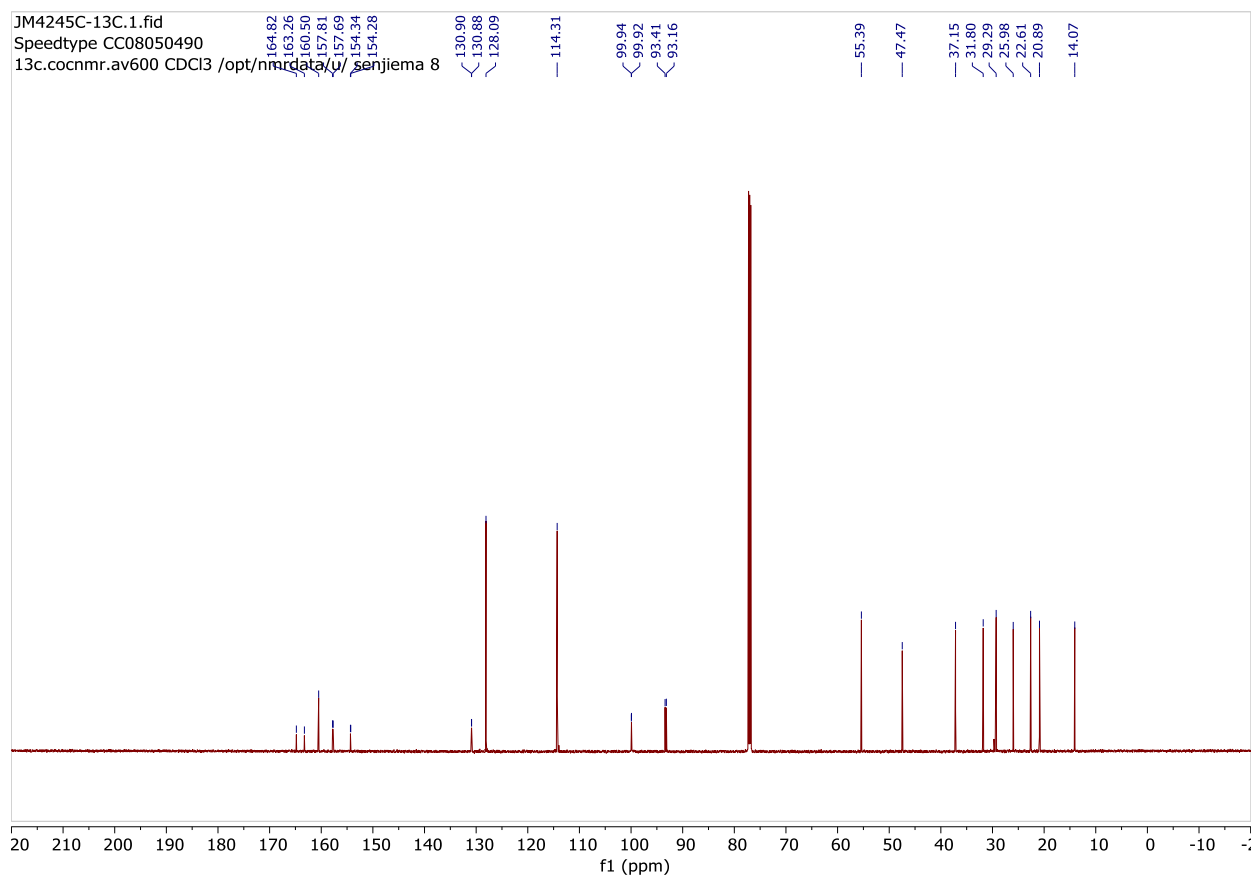

[Return to table of contents]

# <sup>19</sup>F NMR



### Compound 3ap

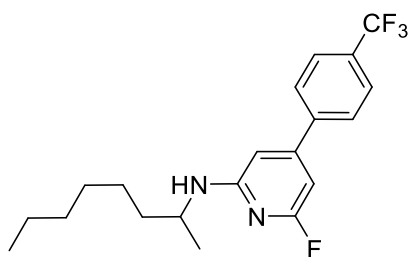

### <sup>1</sup>H NMR

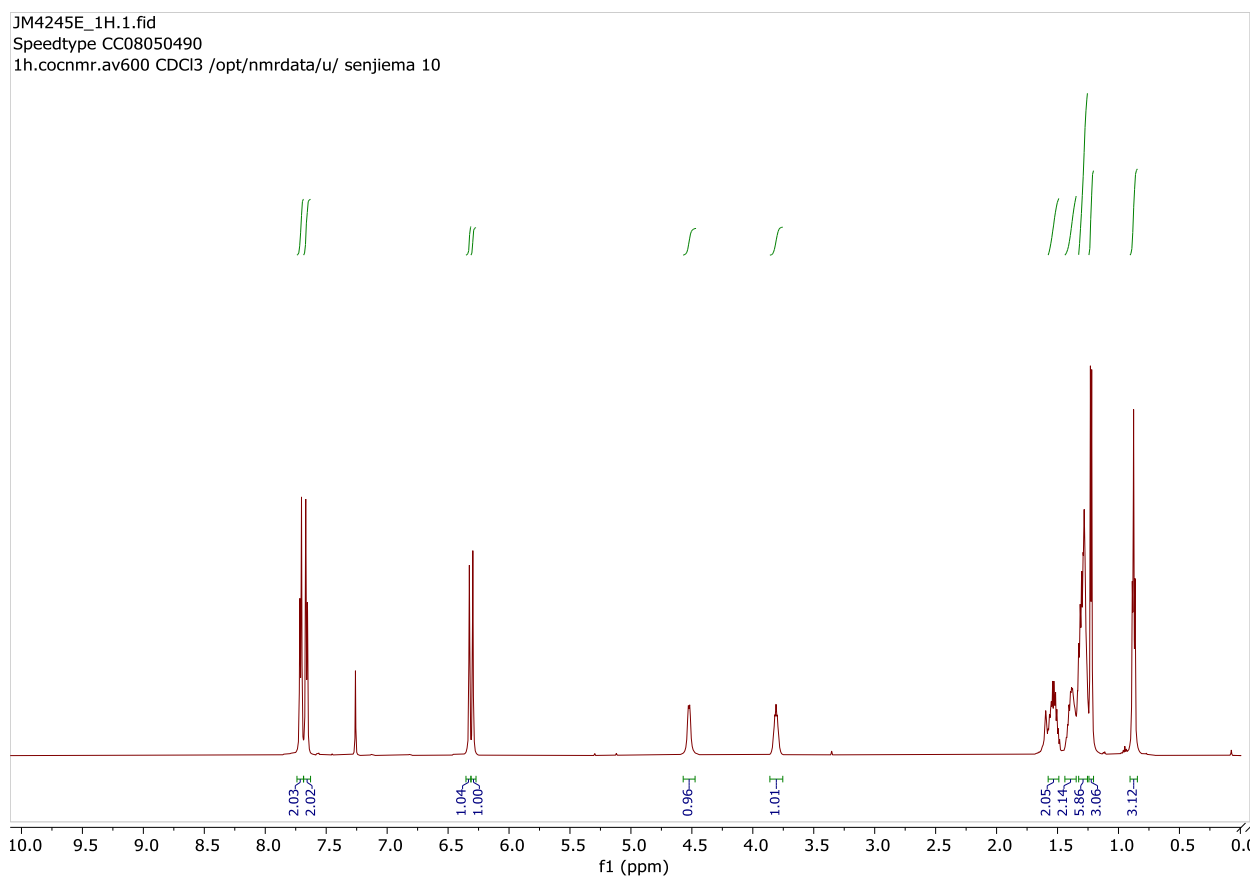

### <sup>13</sup>C NMR

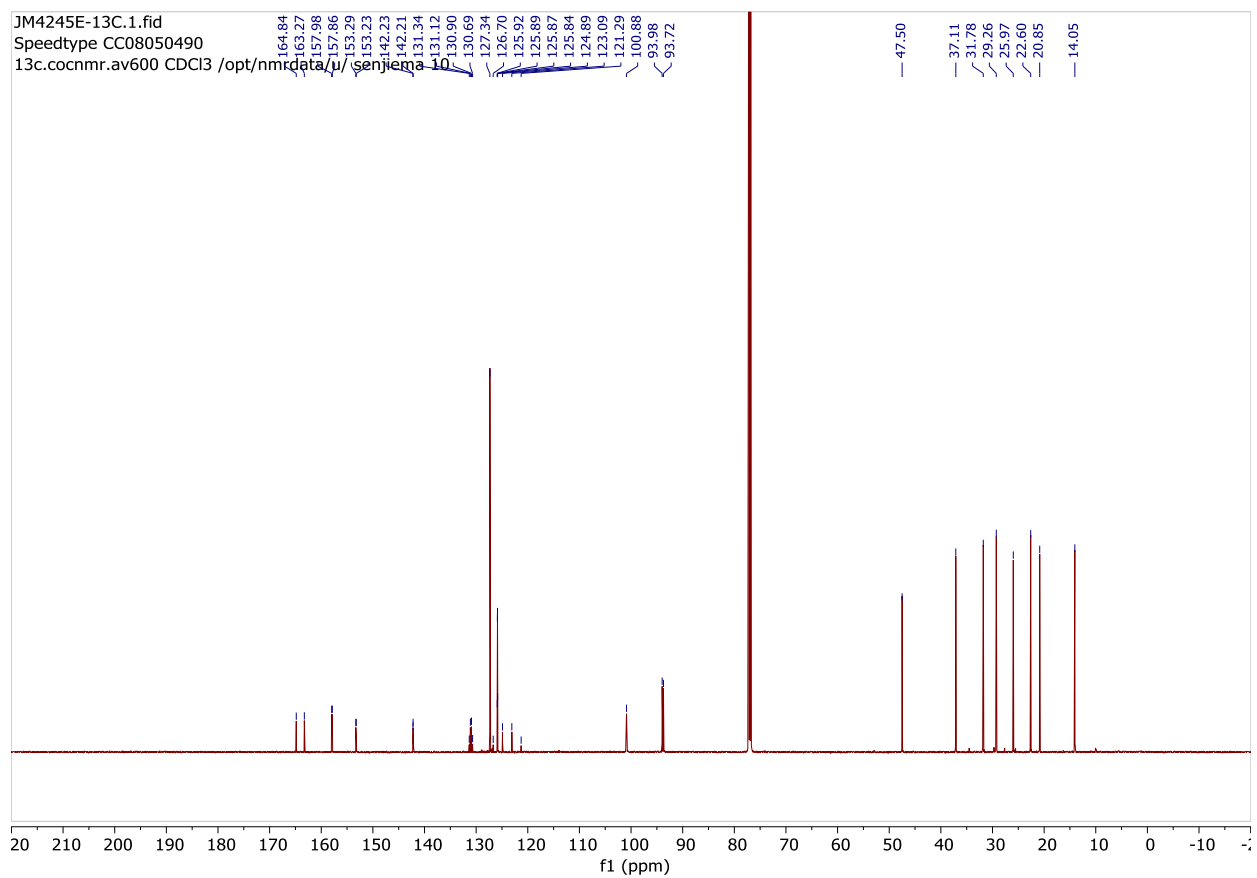

**<sup>19</sup>F NMR**

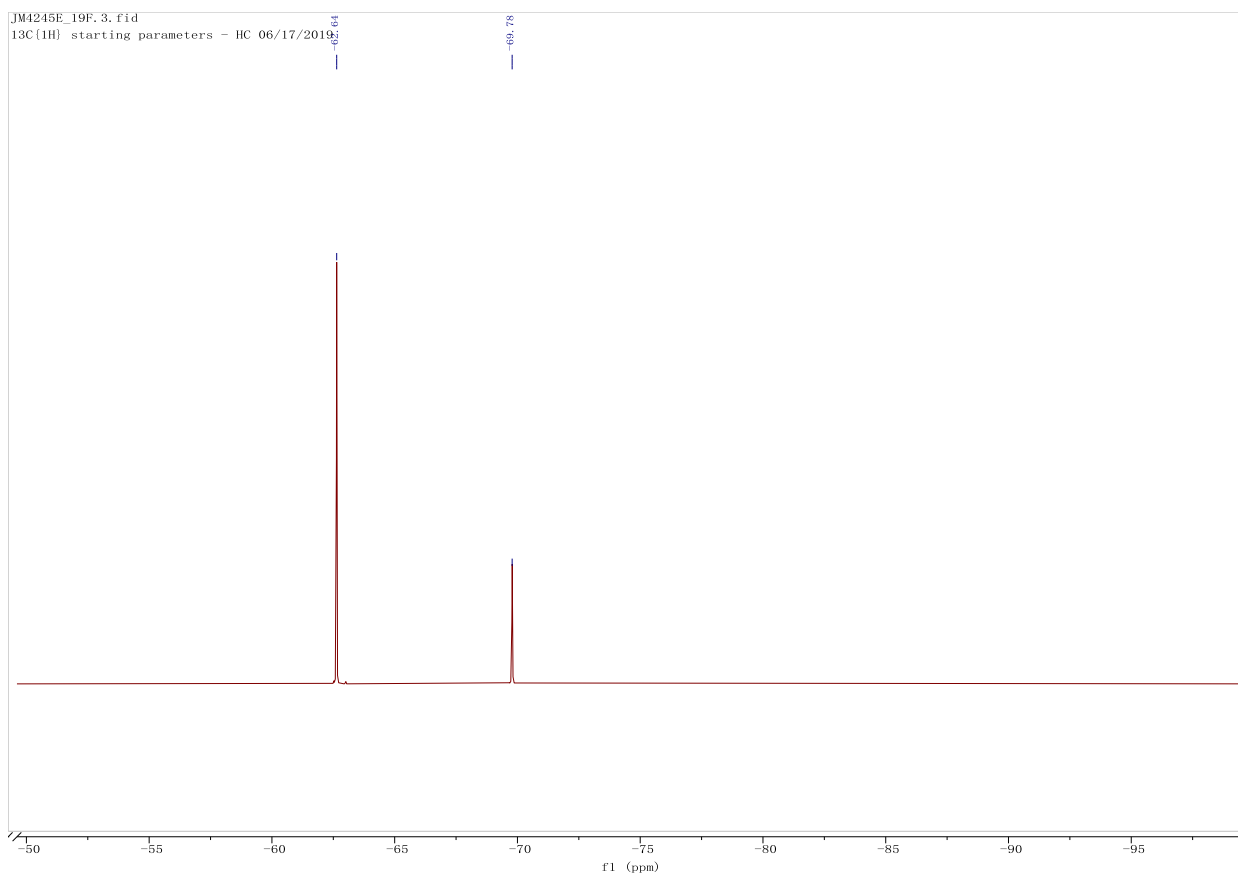

## Compound 3aq

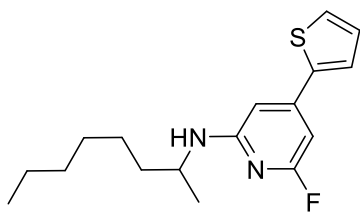

## <sup>1</sup>H NMR

JM4245G\_1H.1.fid  
Speedtype CC08050490  
1h.cocnmr.av600 CDCl3 /opt/nmrdata/u/ senjiema 12

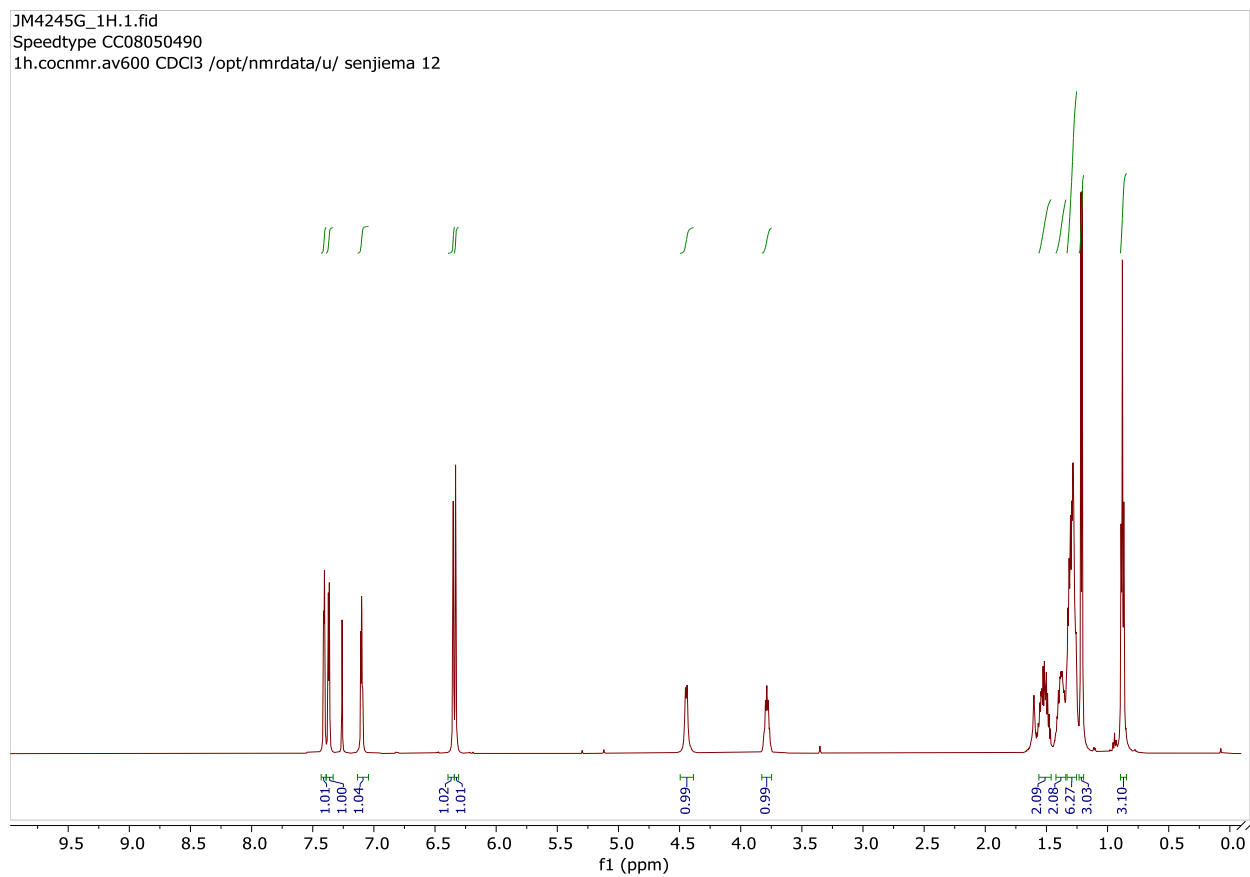

# <sup>13</sup>C NMR

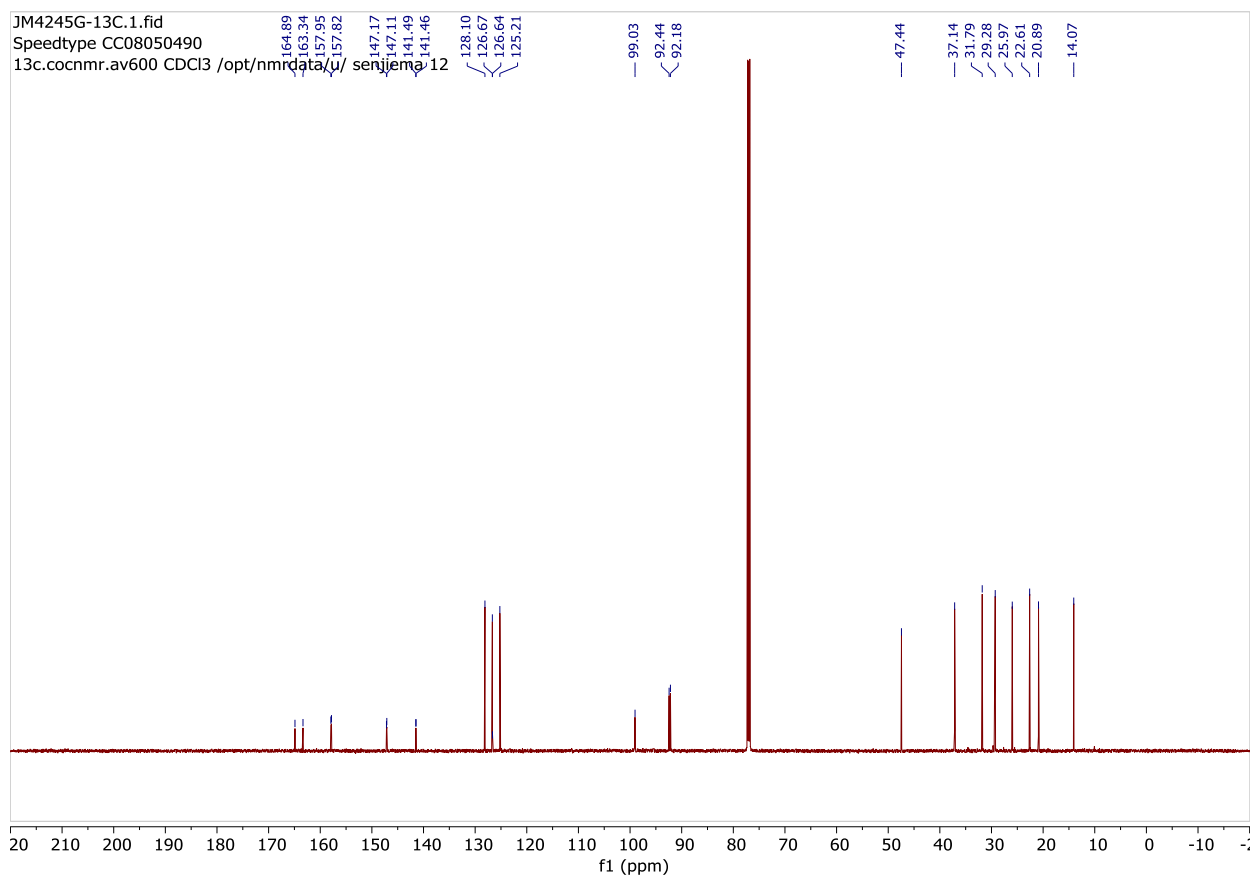

[Return to table of contents]

# <sup>19</sup>F NMR

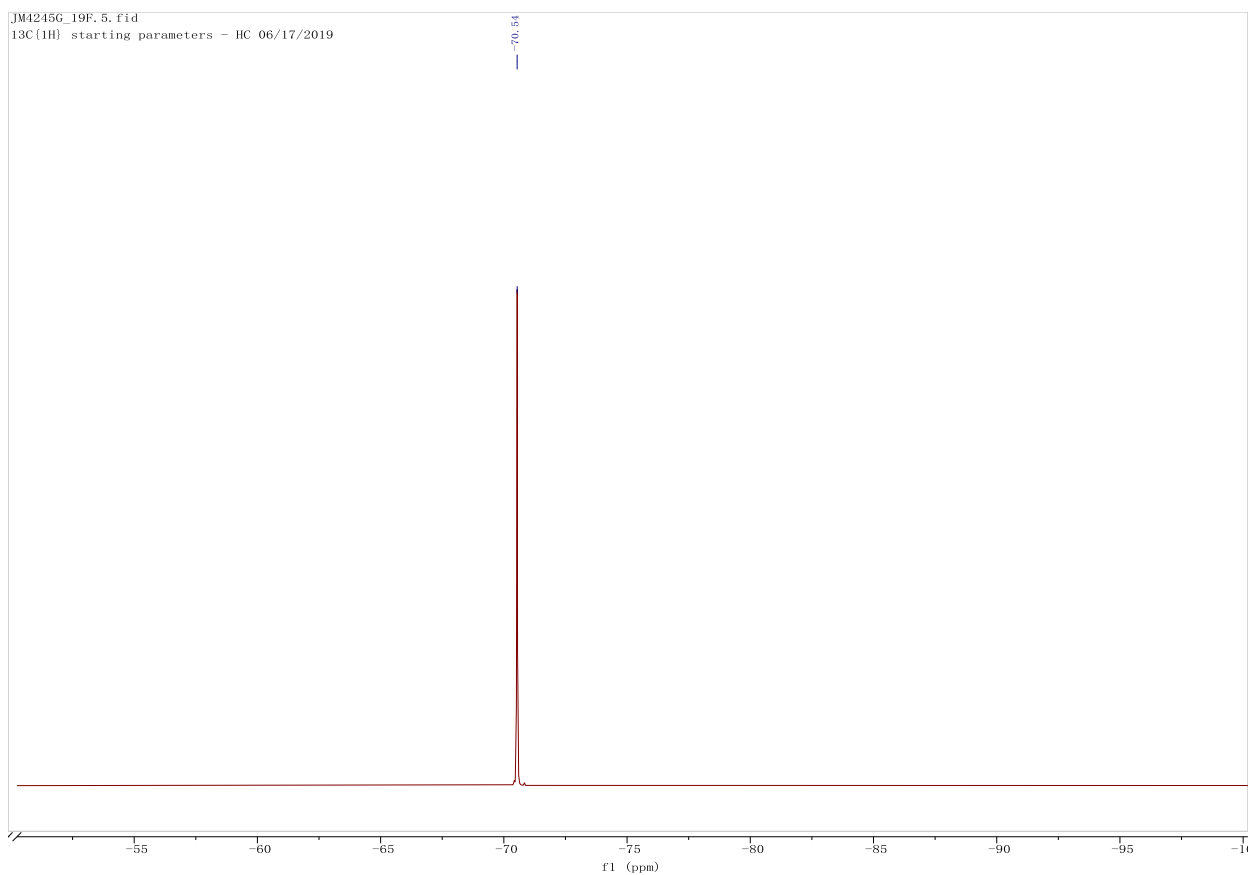



### Compound 3ar

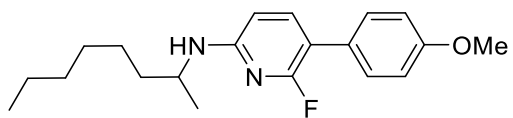

### <sup>1</sup>H NMR

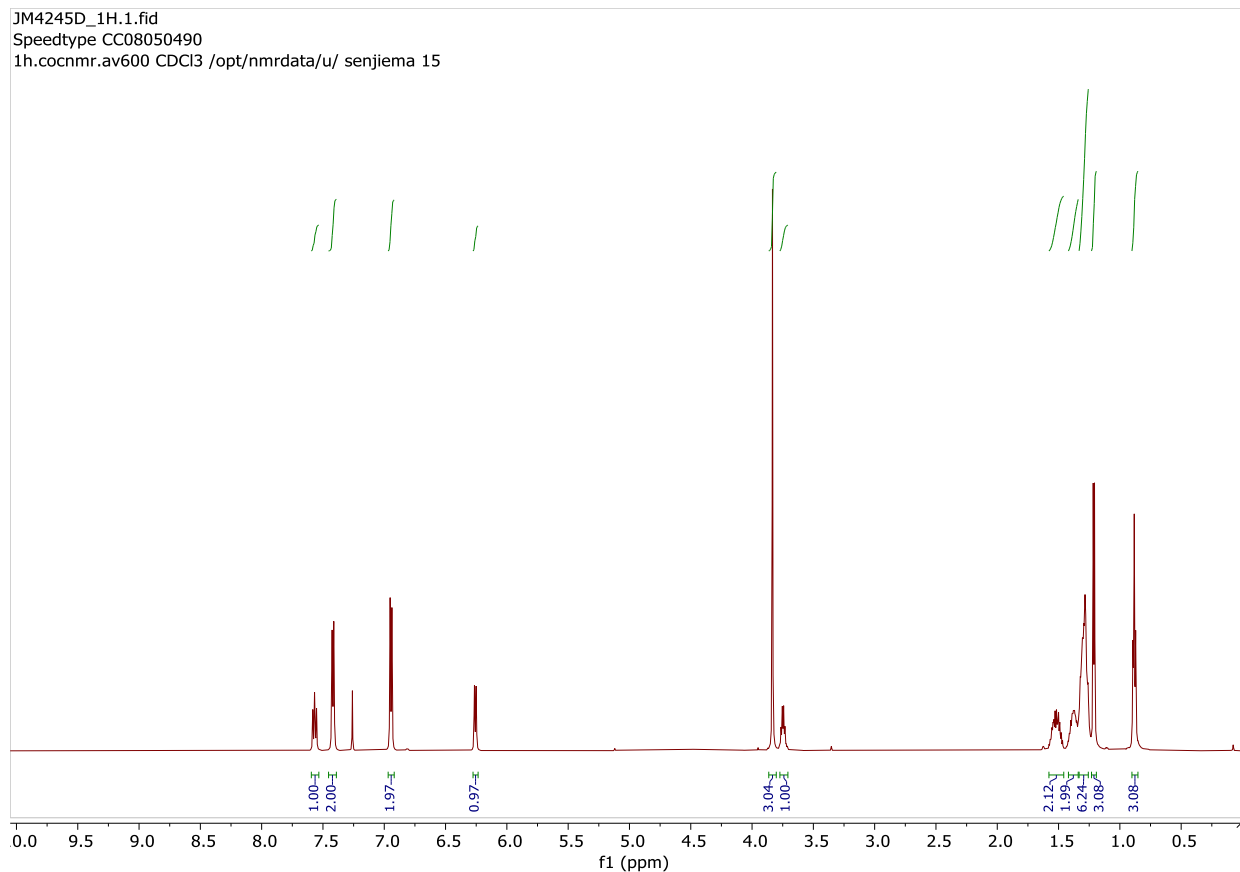

### <sup>13</sup>C NMR

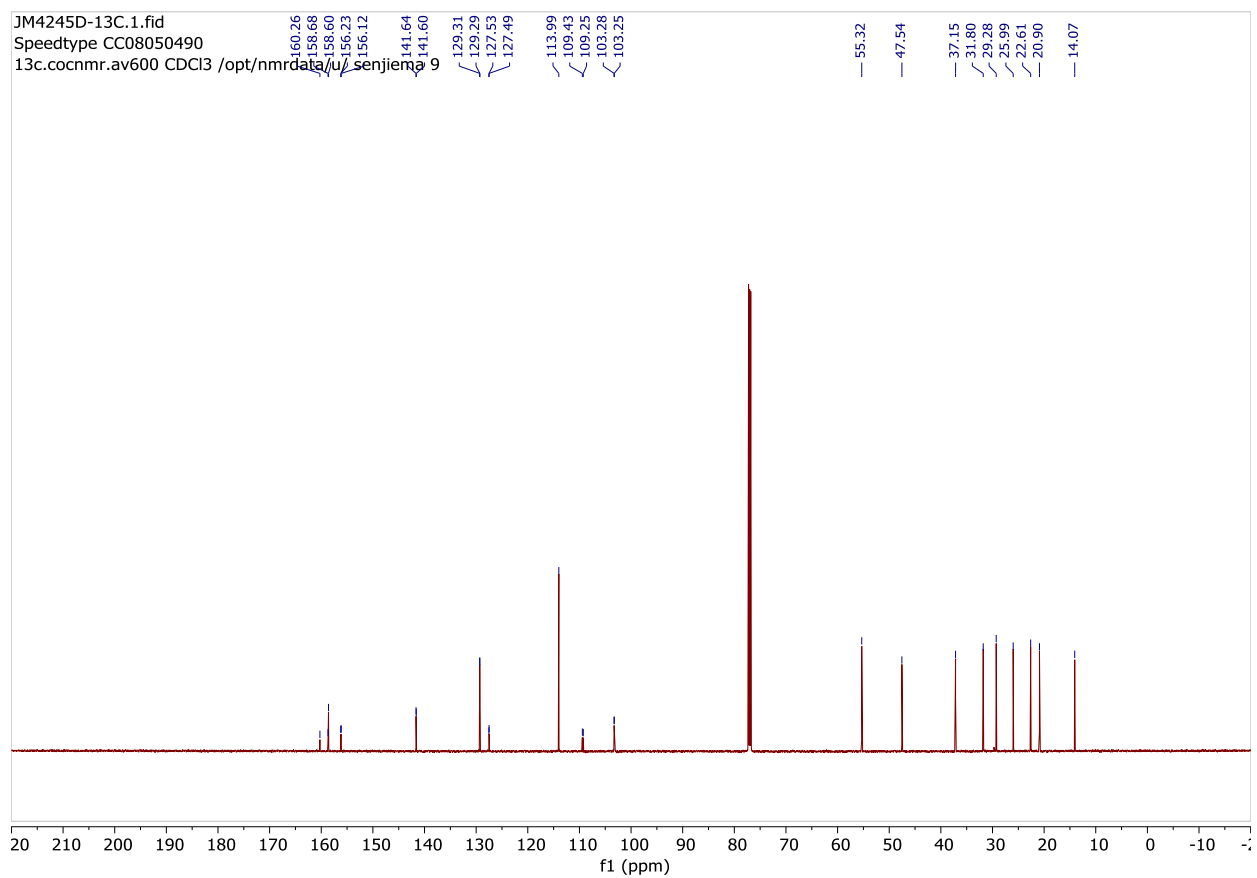

[Return to table of contents]

# <sup>19</sup>F NMR

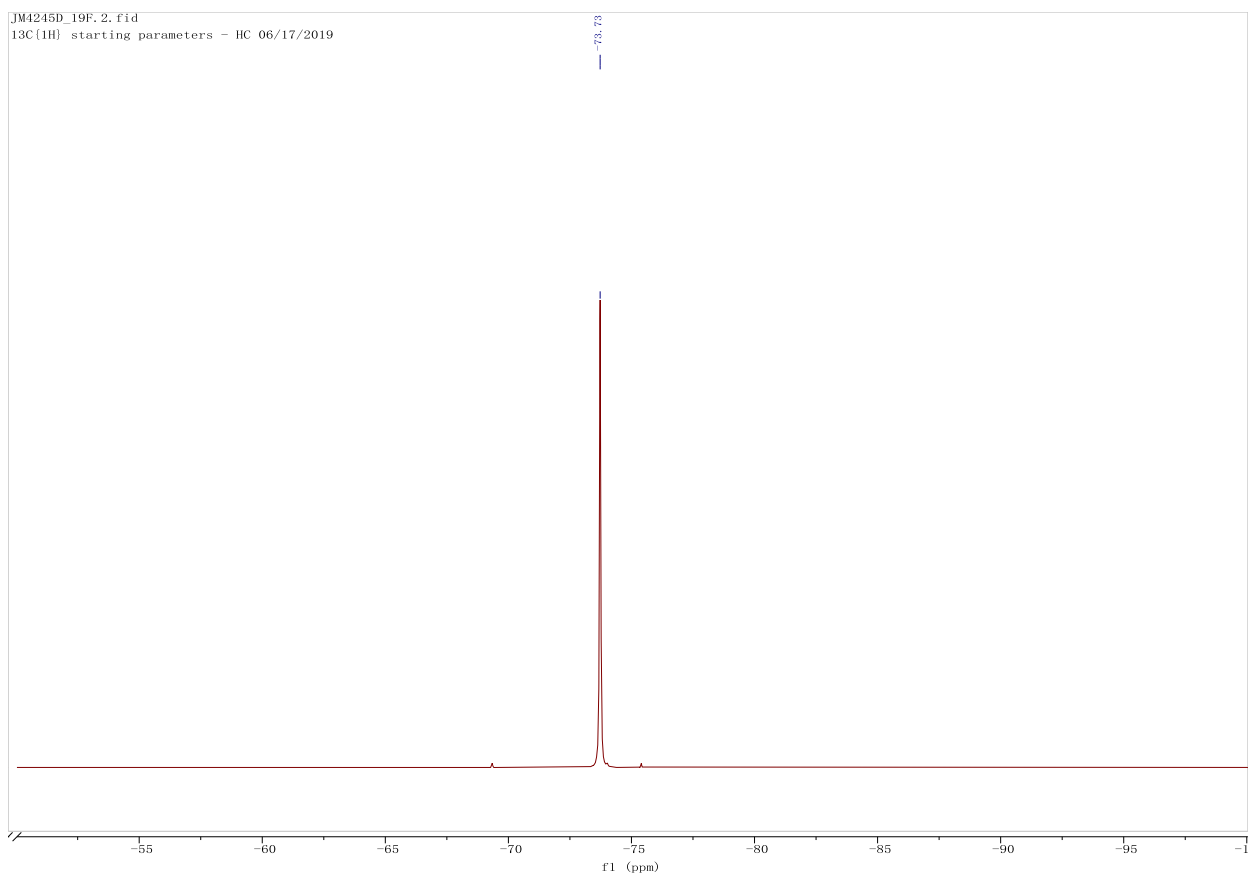

### Compound 3as

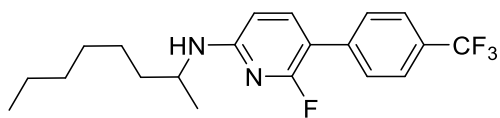

### <sup>1</sup>H NMR

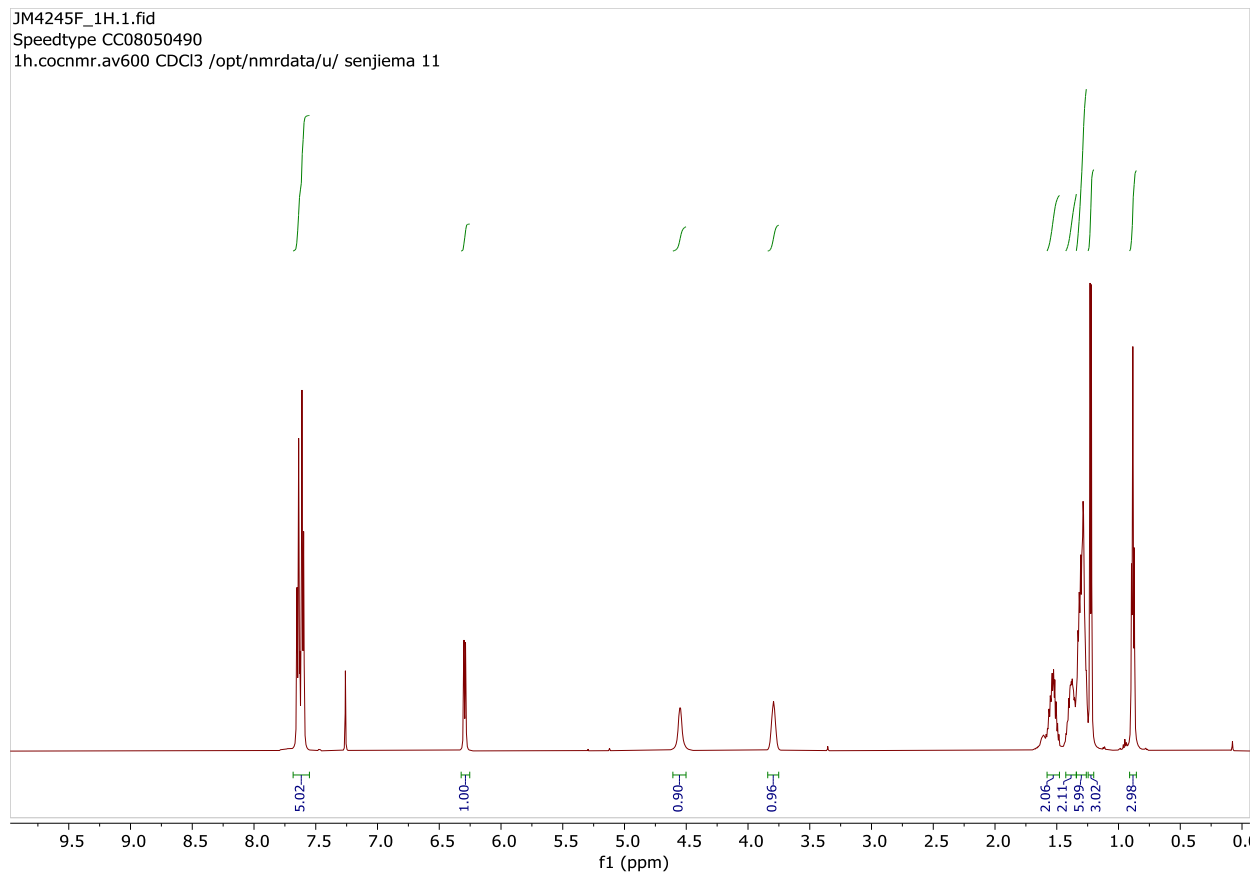

**<sup>13</sup>C NMR**

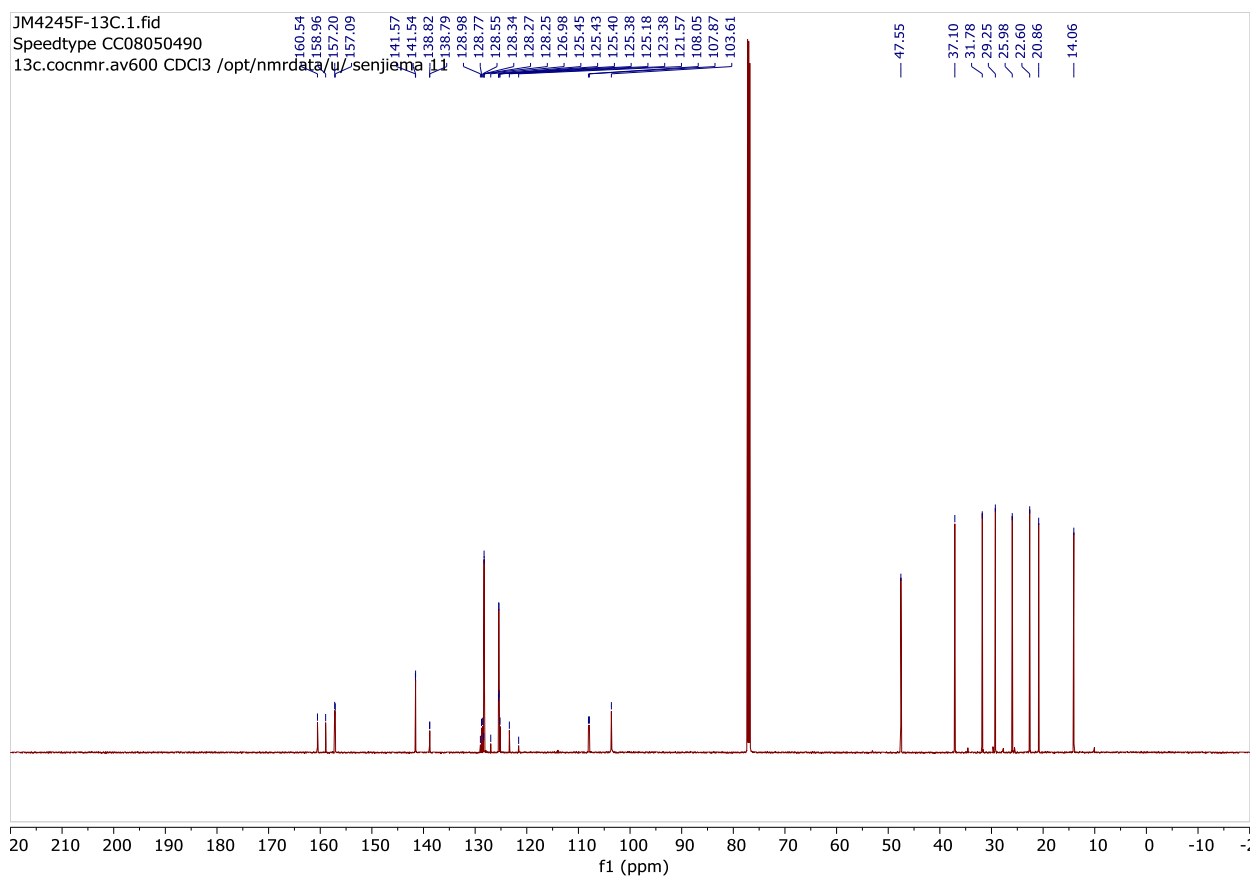

# <sup>19</sup>F NMR

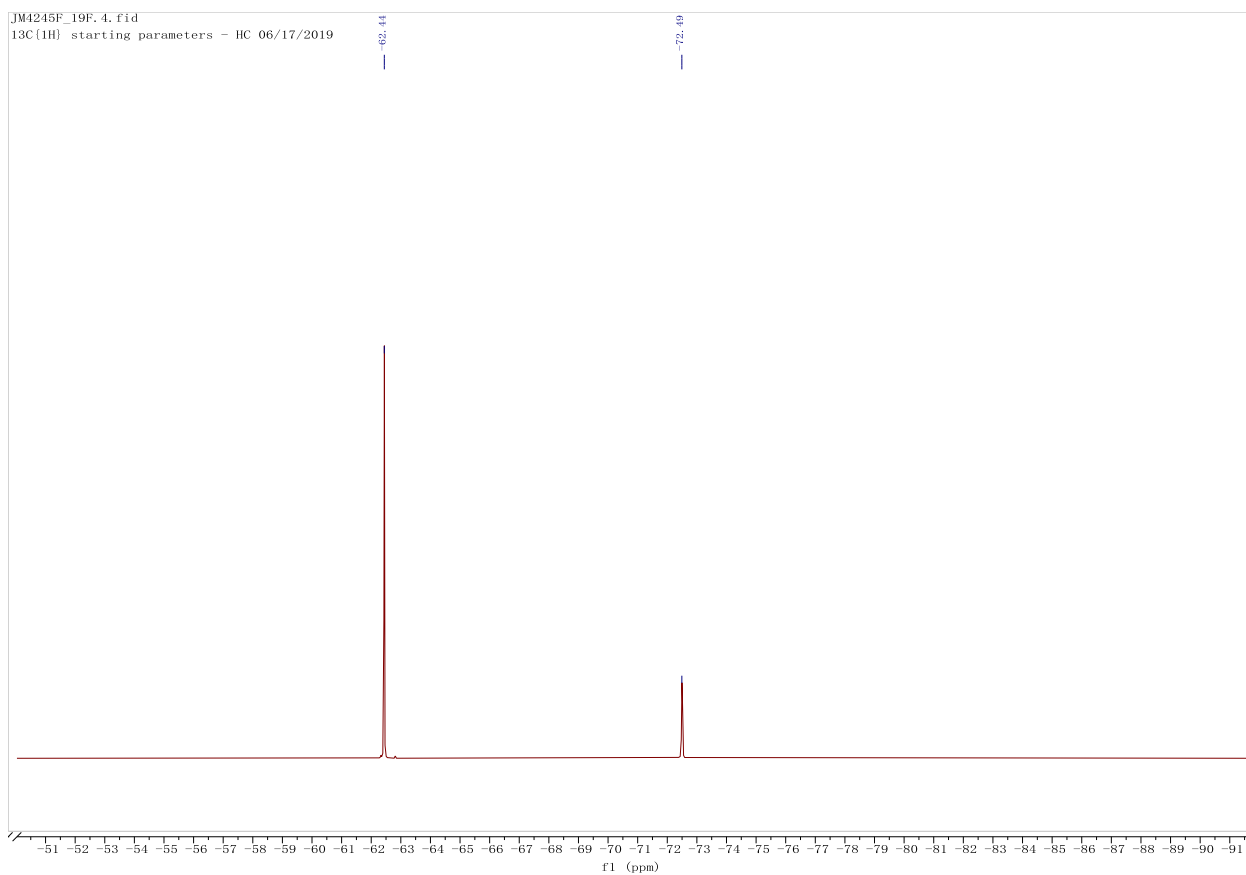

## Compound 4ab

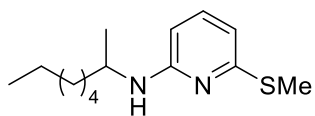

## <sup>1</sup>H NMR

JM4244A\_1H.3.fid

13C{1H} starting parameters - HC 06/17/2019

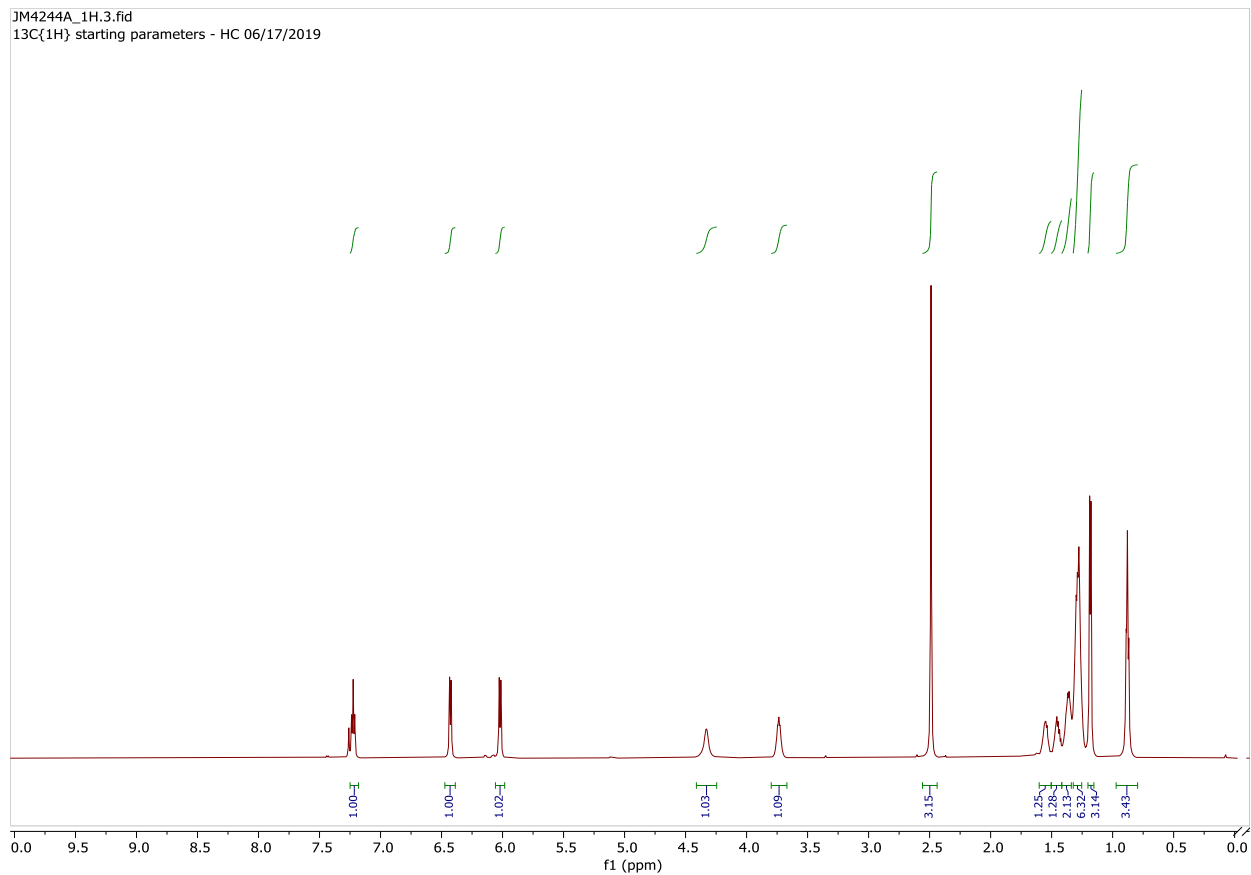

# <sup>13</sup>C NMR

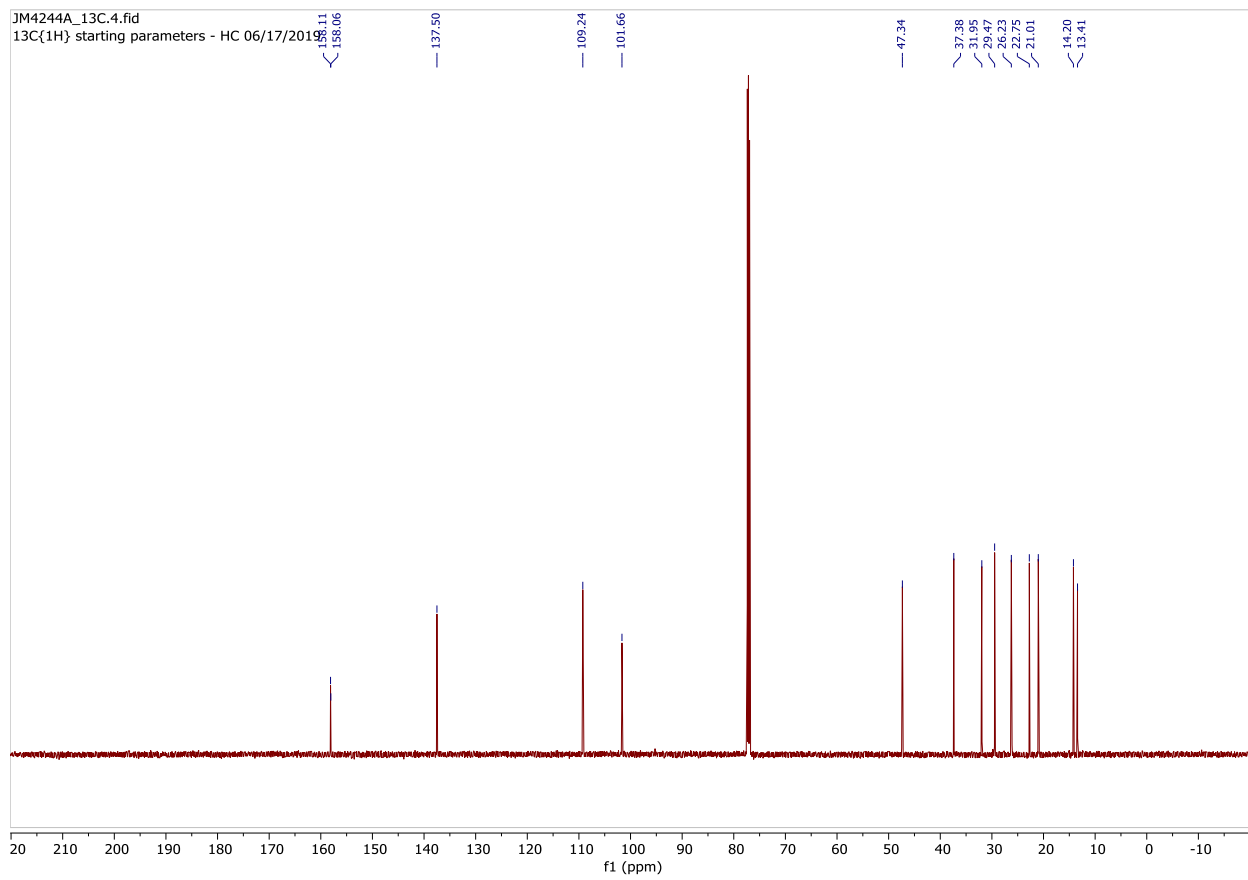



## Compound 5ab

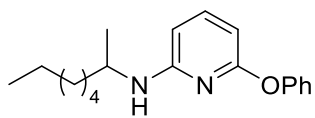

## <sup>1</sup>H NMR

JM4244B\_1H.4.fid

13C{1H} starting parameters - HC 06/17/2019

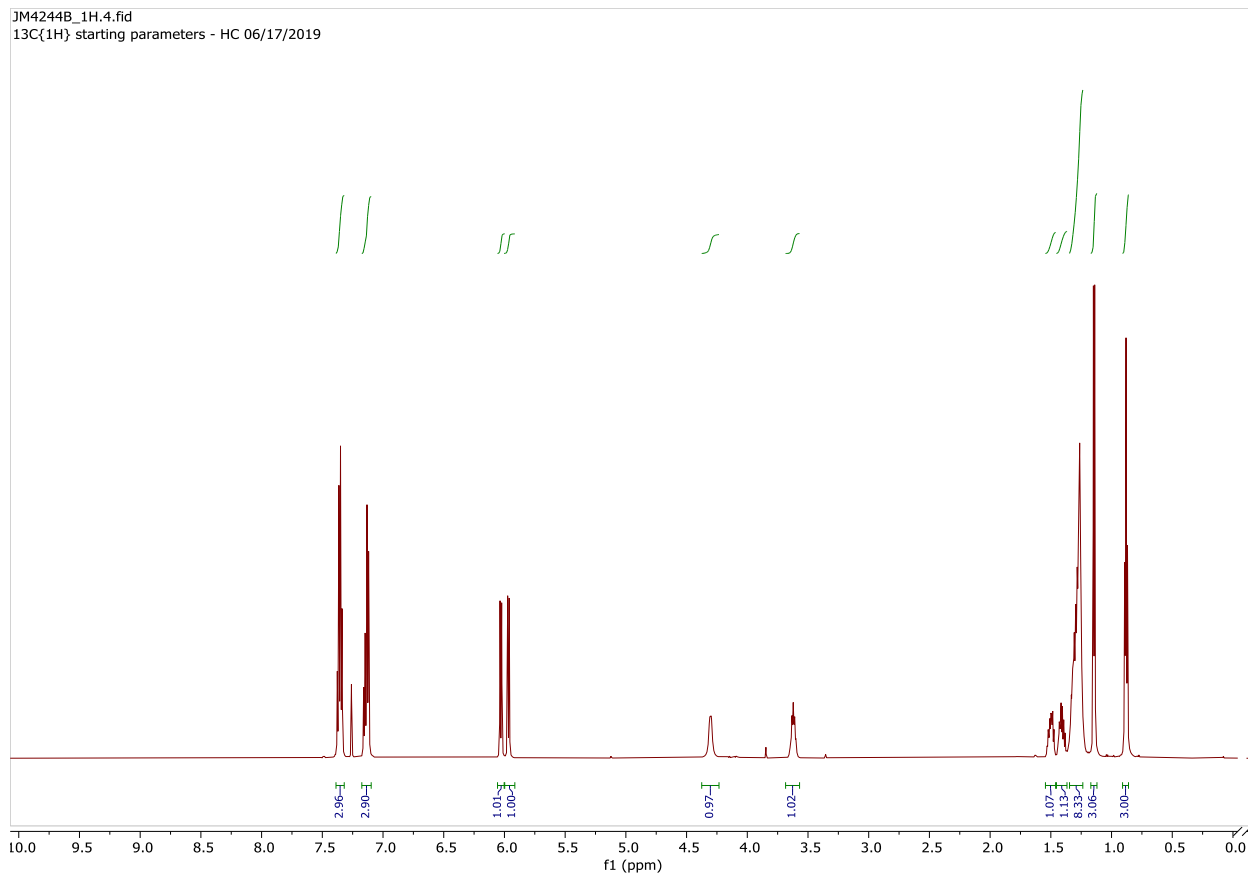

# <sup>13</sup>C NMR

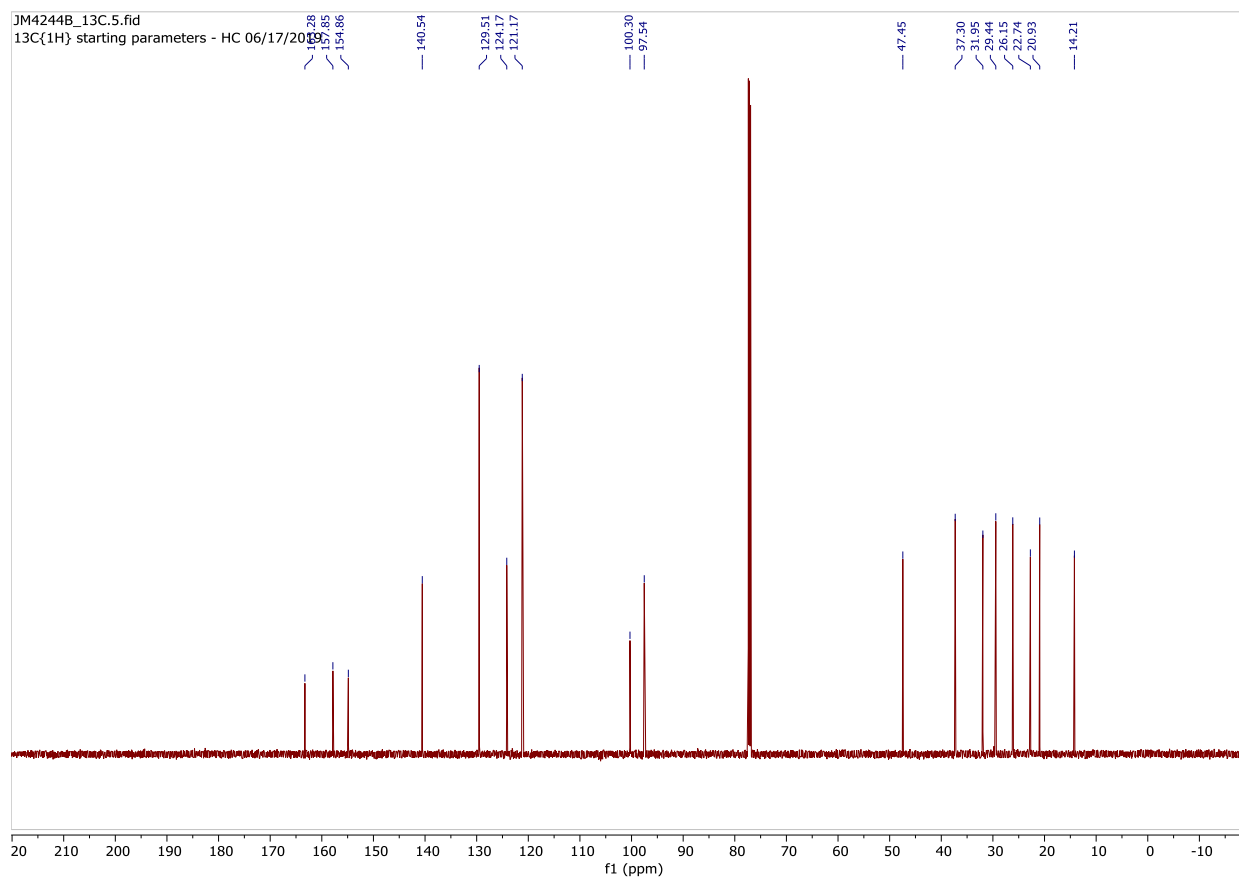

## Compound 6ab

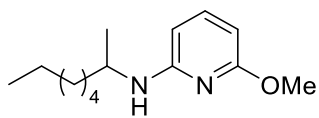

## <sup>1</sup>H NMR

JM4244C\_1H.5.fid

13C(1H) starting parameters - HC 06/17/2019

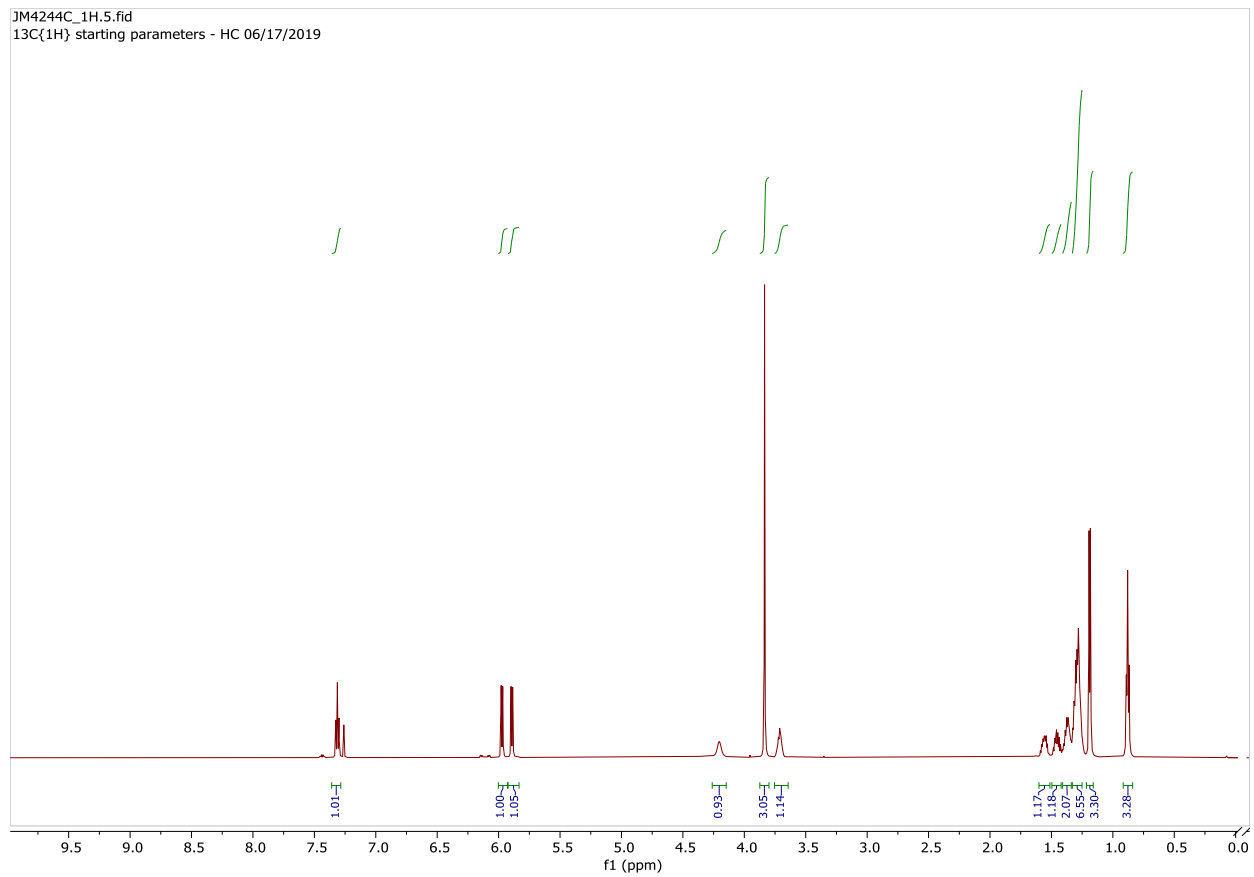

# <sup>13</sup>C NMR

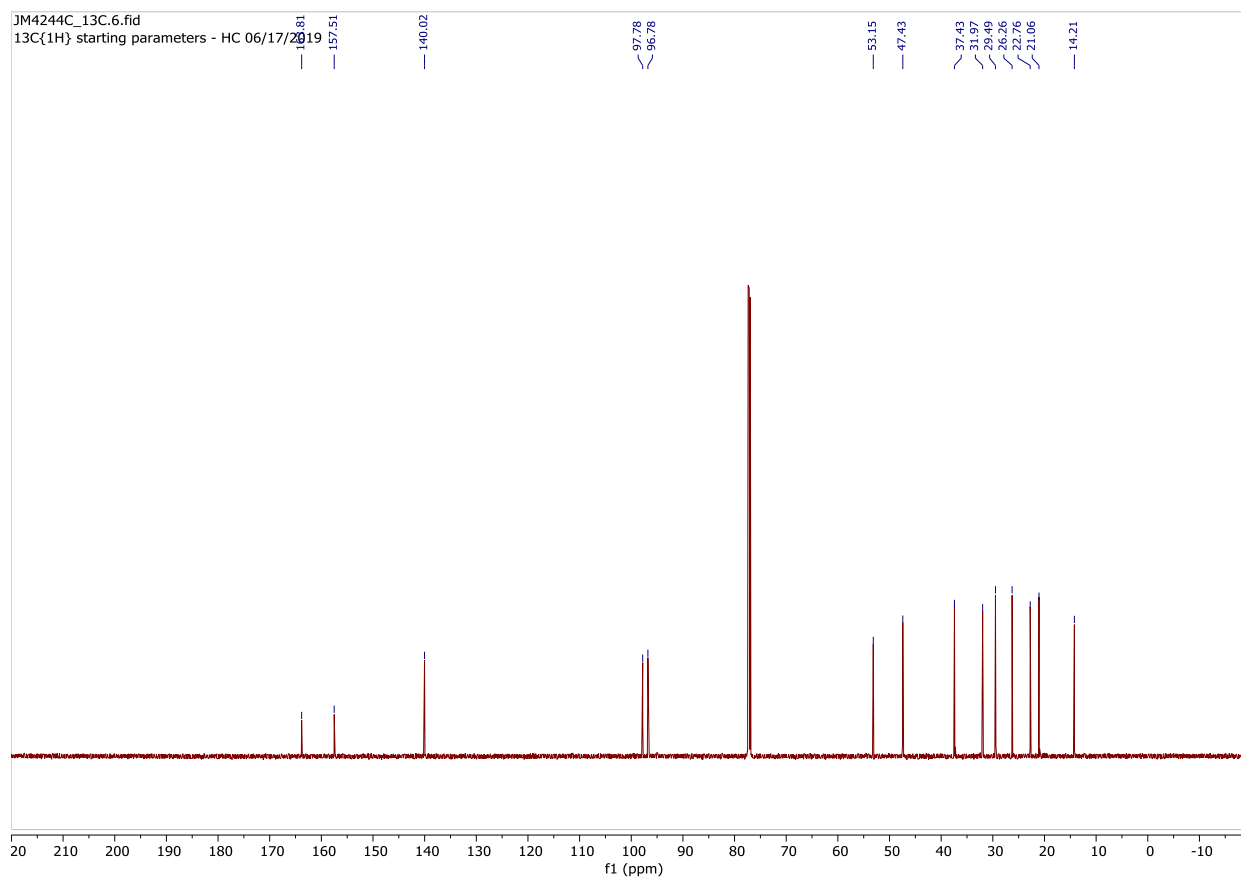

### Compound 7ab

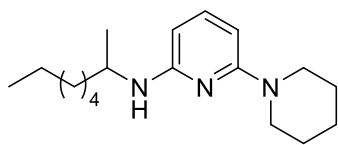

### <sup>1</sup>H NMR

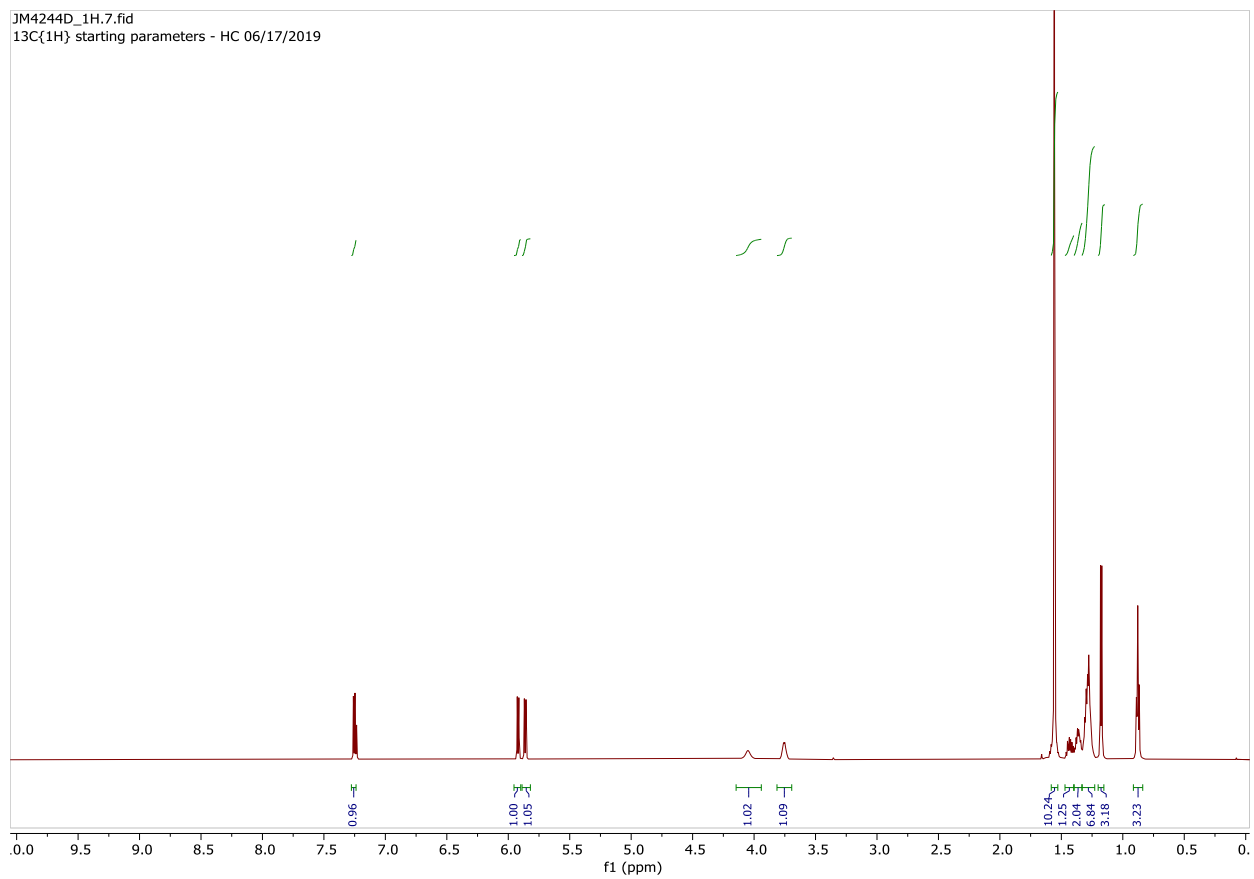

# <sup>13</sup>C NMR

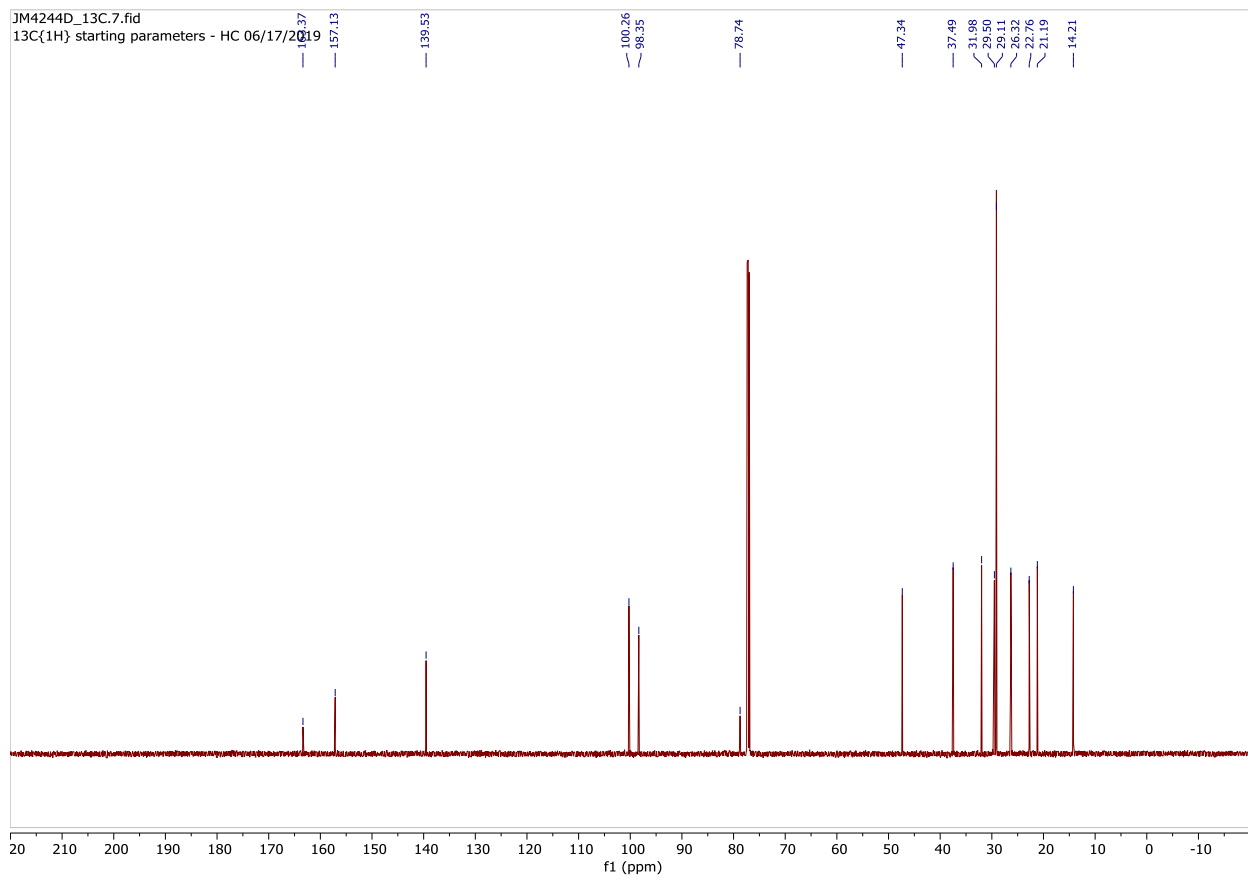

[Return to table of contents]

## Compound 8ab

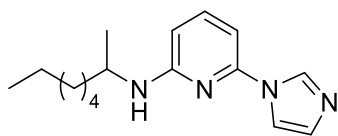

## <sup>1</sup>H NMR

JM4258A\_prod\_1H.10.fid  
Speedtype CC08050715

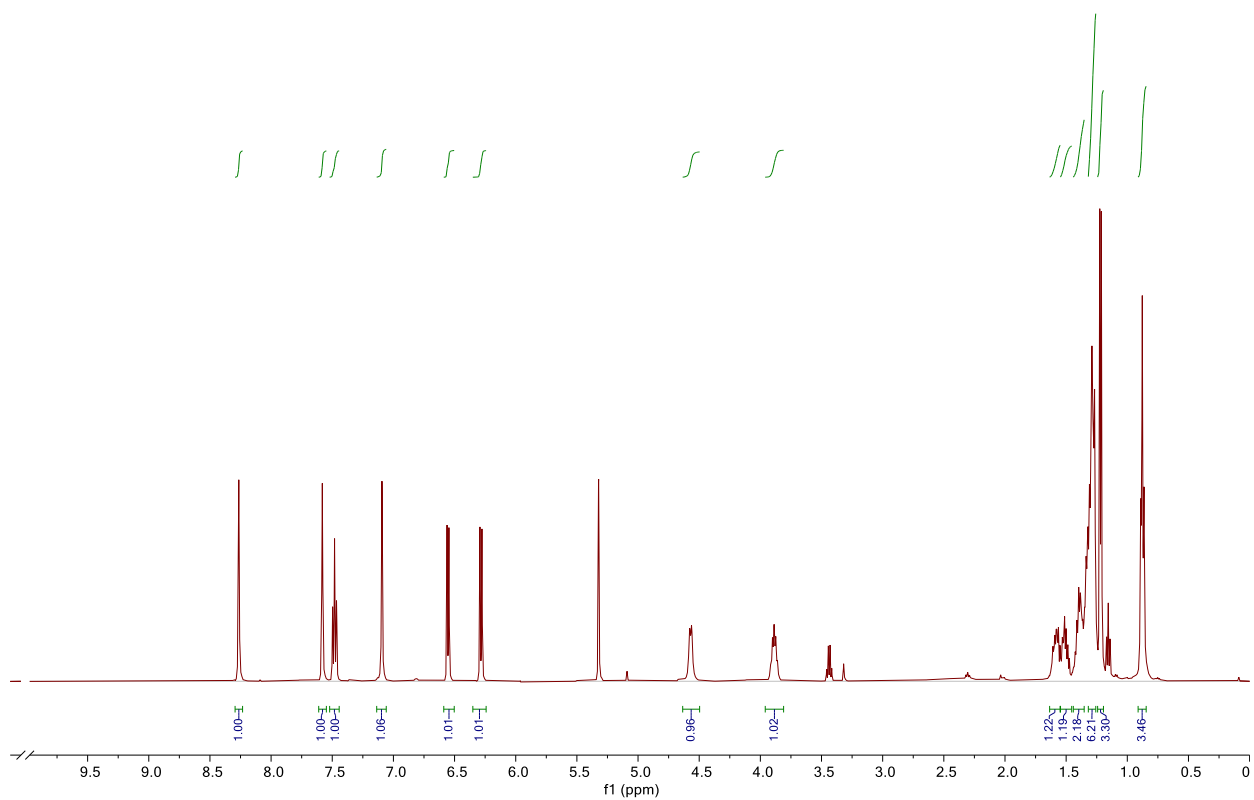

[Return to table of contents]

### <sup>13</sup>C NMR

JM4258A\_prod\_13C.12.fid  
Speedtype CC08050715

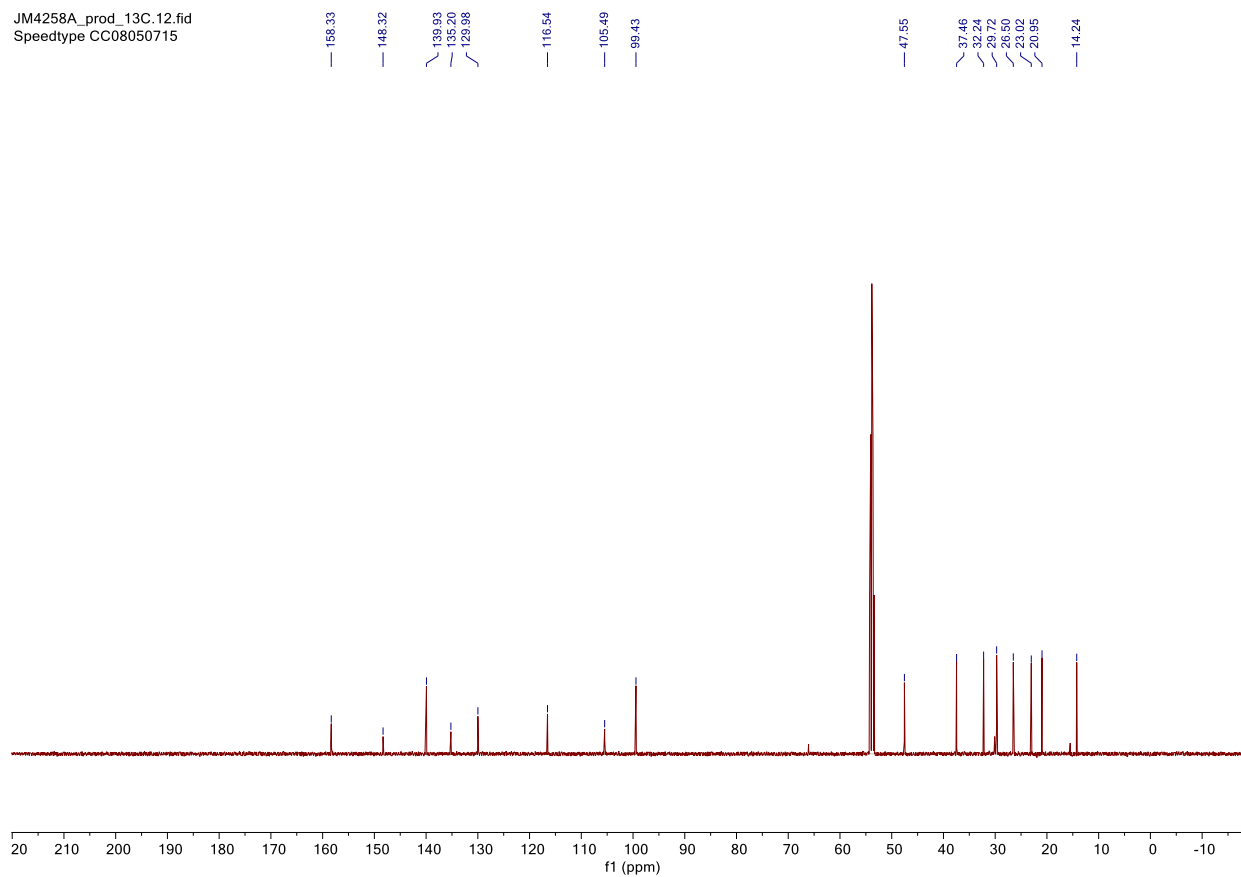



## Compound 9ab

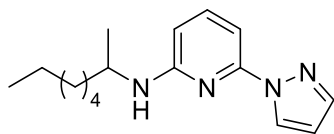

## <sup>1</sup>H NMR

JM4258B\_prod\_1H.10.fid  
Speedtype CC08050715

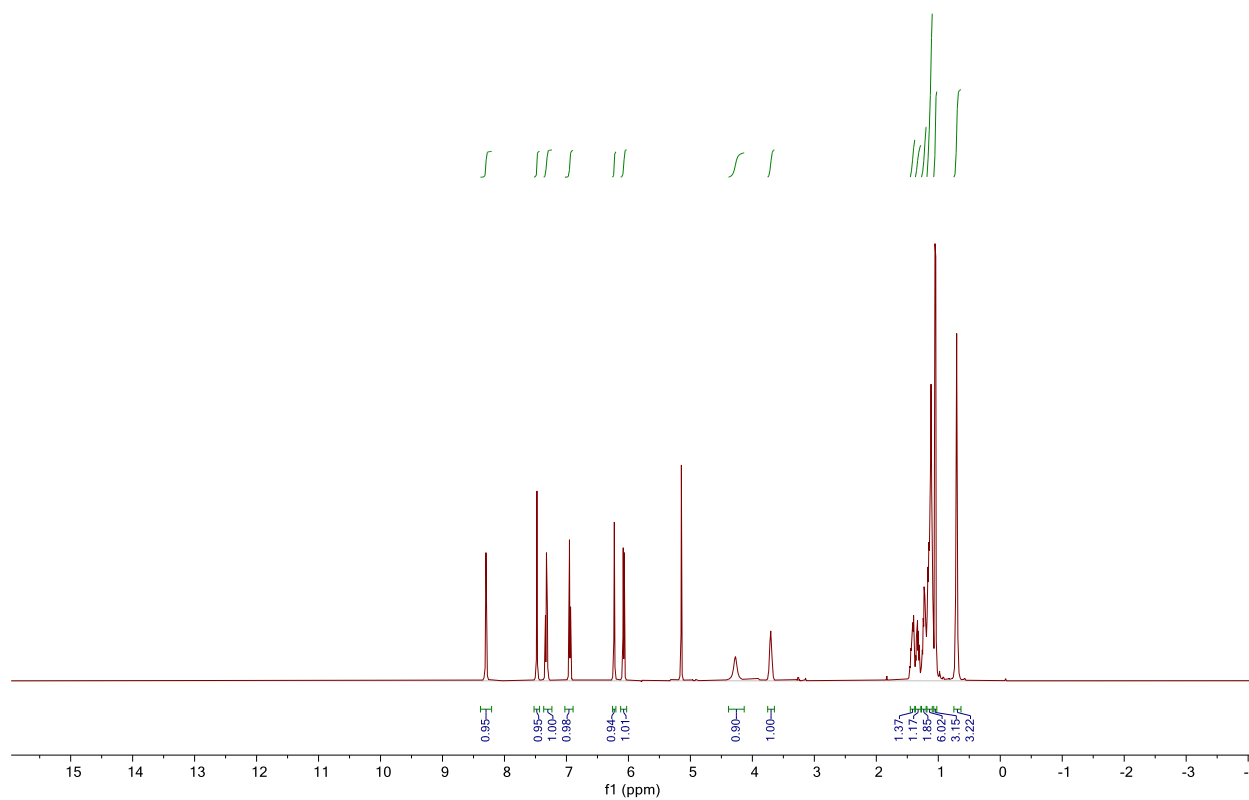

# <sup>13</sup>C NMR

JM4254C\_13\_13C.3.fid

13C(1H) starting parameters -

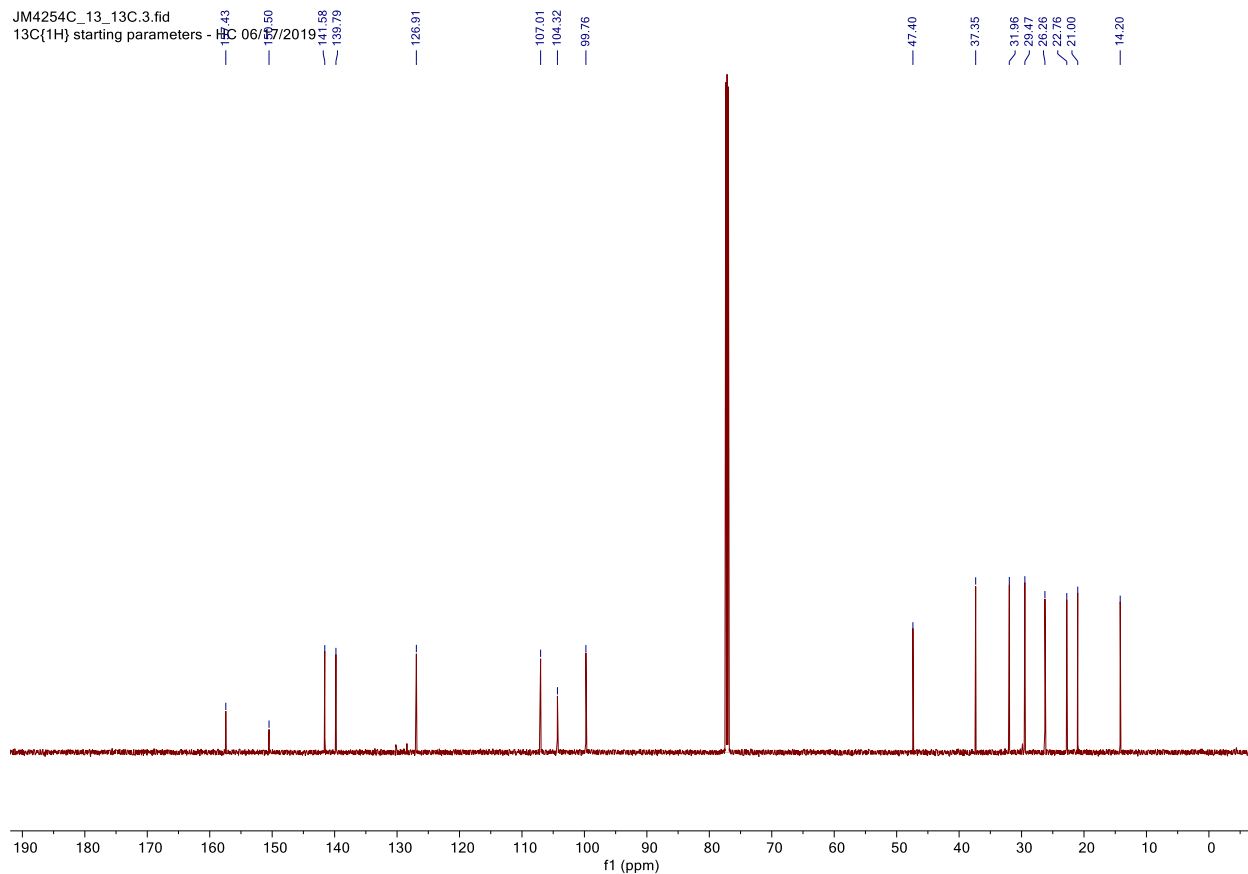

## 10. References

1. Shen, K.; Wang, Q., Copper-Catalyzed Alkene Aminoazidation as a Rapid Entry to 1,2-Diamines and Installation of an Azide Reporter onto Azaheterocycles. *J. Am. Chem. Soc.* **2017**, *139* (37), 13110-13116.
2. Robbins, D. W.; Hartwig, J. F., A C–H Borylation Approach to Suzuki–Miyaura Coupling of Typically Unstable 2–Heteroaryl and Polyfluorophenyl Boronates. *Org. Lett.* **2012**, *14* (16), 4266-4269.
3. Berhal, F.; Esseiva, O.; Martin, C.-H.; Tone, H.; Genet, J.-P.; Ayad, T.; Ratovelomanana-Vidal, V., (R)-3,5-diCF<sub>3</sub>-SYNPHOS and (R)-p-CF<sub>3</sub>-SYNPHOS, Electron-Poor Diphosphines for Efficient Room Temperature Rh-Catalyzed Asymmetric Conjugate Addition of Arylboronic Acids. *Org. Lett.* **2011**, *13* (11), 2806-2809.
4. Cincinelli, R.; Dallavalle, S.; Nannei, R.; Merlini, L.; Penco, S.; Giannini, G.; Pisano, C.; Vesci, L.; Ferrara, F. F.; Zuco, V.; Zanchi, C.; Zunino, F., Synthesis and structure–activity relationships of new antiproliferative and proapoptotic retinoid-related biphenyl-4-yl-acrylic acids. *Biorg. Med. Chem.* **2007**, *15* (14), 4863-4875.
5. Zuo, Z.; Kim, R. S.; Watson, D. A., Synthesis of Axially Chiral 2,2'-Bisphosphobiarenes via a Nickel-Catalyzed Asymmetric Ullmann Coupling: General Access to Privileged Chiral Ligands without Optical Resolution. *J. Am. Chem. Soc.* **2021**, *143* (3), 1328-1333.
6. Sevov, C. S.; Hartwig, J. F., Iridium-Catalyzed Oxidative Olefination of Furans with Unactivated Alkenes. *J. Am. Chem. Soc.* **2014**, *136* (30), 10625-10631.
